# Supplementary material for: Comprehensive Researcher Achievement Model (CRAM): a framework for measuring researcher achievement, impact and influence derived from a systematic literature review of metrics and models
Source: PubMed Central journal article supplement — BMJ Open. 2019 Mar 30;9(3):e025320. doi: 10.1136/bmjopen-2018-025320 (PMC6475357; doi:10.1136/bmjopen-2018-025320), 2019-03-30
Supplement: bmjopen-2018-025320.draft_revisions.pdf [file bmjopen-2018-025320.draft_revisions.pdf]

# BMJ Open

BMJ Open is committed to open peer review. As part of this commitment we make the peer review history of every article we publish publicly available.

When an article is published we post the peer reviewers' comments and the authors' responses online. We also post the versions of the paper that were used during peer review. These are the versions that the peer review comments apply to.

The versions of the paper that follow are the versions that were submitted during the peer review process. They are not the versions of record or the final published versions. They should not be cited or distributed as the published version of this manuscript.

BMJ Open is an open access journal and the full, final, typeset and author-corrected version of record of the manuscript is available on our site with no access controls, subscription charges or pay-per-view fees (<http://bmjopen.bmj.com>).

If you have any questions on BMJ Open's open peer review process please email [editorial.bmjopen@bmj.com](mailto:editorial.bmjopen@bmj.com)

# BMJ Open

**The Comprehensive Researcher Achievement Model  
(CRAM):  
a framework for measuring researcher achievement, impact  
and influence derived from a systematic literature review of  
metrics and models**

|                               |                                                                                                                                                                                                                                                                                                                                                                                                                                                                                                                                                                                                                                                                                                                                                                                                                                                                                                                                                                                                                                                                                                                                                                                                                                                                                                                                                                                                                                                                                                                                                                                                                                                                                                                                                                                                                                                                                                                                                                               |
|-------------------------------|-------------------------------------------------------------------------------------------------------------------------------------------------------------------------------------------------------------------------------------------------------------------------------------------------------------------------------------------------------------------------------------------------------------------------------------------------------------------------------------------------------------------------------------------------------------------------------------------------------------------------------------------------------------------------------------------------------------------------------------------------------------------------------------------------------------------------------------------------------------------------------------------------------------------------------------------------------------------------------------------------------------------------------------------------------------------------------------------------------------------------------------------------------------------------------------------------------------------------------------------------------------------------------------------------------------------------------------------------------------------------------------------------------------------------------------------------------------------------------------------------------------------------------------------------------------------------------------------------------------------------------------------------------------------------------------------------------------------------------------------------------------------------------------------------------------------------------------------------------------------------------------------------------------------------------------------------------------------------------|
| Journal:                      | <i>BMJ Open</i>                                                                                                                                                                                                                                                                                                                                                                                                                                                                                                                                                                                                                                                                                                                                                                                                                                                                                                                                                                                                                                                                                                                                                                                                                                                                                                                                                                                                                                                                                                                                                                                                                                                                                                                                                                                                                                                                                                                                                               |
| Manuscript ID                 | bmjopen-2018-025320                                                                                                                                                                                                                                                                                                                                                                                                                                                                                                                                                                                                                                                                                                                                                                                                                                                                                                                                                                                                                                                                                                                                                                                                                                                                                                                                                                                                                                                                                                                                                                                                                                                                                                                                                                                                                                                                                                                                                           |
| Article Type:                 | Research                                                                                                                                                                                                                                                                                                                                                                                                                                                                                                                                                                                                                                                                                                                                                                                                                                                                                                                                                                                                                                                                                                                                                                                                                                                                                                                                                                                                                                                                                                                                                                                                                                                                                                                                                                                                                                                                                                                                                                      |
| Date Submitted by the Author: | 10-Jul-2018                                                                                                                                                                                                                                                                                                                                                                                                                                                                                                                                                                                                                                                                                                                                                                                                                                                                                                                                                                                                                                                                                                                                                                                                                                                                                                                                                                                                                                                                                                                                                                                                                                                                                                                                                                                                                                                                                                                                                                   |
| Complete List of Authors:     | <p>Braithwaite, Jeffrey; Macquarie University, Australian Institute of Health Innovation<br/> Herkes, Jessica; Macquarie University, Australian Institute of Health Innovation<br/> Churruca, Kate; Macquarie University, Australian Institute of Health Innovation; Macquarie University<br/> Long , Janet; Australian Institute of Health Innovation, Centre for Healthcare Resilience and Implementation Science<br/> Pomare, Chiara; Macquarie University Faculty of Medicine and Health Sciences, Australian Institute of Health Innovation<br/> Boyling, Claire; Macquarie University Faculty of Medicine and Health Sciences, Australian Institute of Health Innovation<br/> Bierbaum, Mia; Macquarie University, Australian Institute of Health Innovation<br/> Clay-Williams, Robyn; Macquarie University, Australian Institute of Health Innovation<br/> Rapport, Frances ; Macquarie University, Australian Institute of Health Innovation<br/> Shih, Patti; Macquarie University, Australian Institute of Health Innovation<br/> Hogden, Anne; Macquarie University, Australian Institute of Health Innovation<br/> Ellis, Louise A.; Macquarie University, Institute of Health Innovation<br/> Ludlow, Kristiana; Macquarie University, Australian Institute of Health Innovation<br/> Austin, Elizabeth; Macquarie University Faculty of Medicine and Health Sciences, Australian Institute of Health Innovation<br/> Seah, Rebecca; Macquarie University Faculty of Medicine and Health Sciences, Australian Institute of Health Innovation<br/> McPherson, Elise; Macquarie University, Australian Institute of Health Innovation<br/> Hibbert, Peter; Macquarie University Faculty of Medicine and Health Sciences, Faculty of Medicine and Health Sciences; University of South Australia Division of Health Sciences,<br/> Westbrook, Johanna; Macquarie University Faculty of Medicine and Health Sciences, Australian Institute of Health Innovation</p> |

1  
2  
3  
4  
5  
6  
7  
8  
9  
10  
11  
12  
13  
14  
15  
16  
17  
18  
19  
20  
21  
22  
23  
24  
25  
26  
27  
28  
29  
30  
31  
32  
33  
34  
35  
36  
37  
38  
39  
40  
41  
42  
43  
44  
45  
46  
47  
48  
49  
50  
51  
52  
53  
54  
55  
56  
57  
58  
59  
60

|           |                                                                                                                                       |
|-----------|---------------------------------------------------------------------------------------------------------------------------------------|
| Keywords: | Researcher assessment, Research metrics, h-index, Journal impact factor, Comprehensive Researcher Achievement Model (CRAM), Citations |
|           |                                                                                                                                       |

SCHOLARONE™  
Manuscripts

1  
2  
3 1 **The Comprehensive Researcher Achievement Model (CRAM):**  
4  
5 2 **a framework for measuring researcher achievement, impact and influence derived from**  
6  
7 3 **a systematic literature review of metrics and models**  
8  
9 4

10 5 **Authors**

11 6 Professor Jeffrey Braithwaite (JB)\*<sup>1</sup>, BA, MIR (Hons), MBA, DipLR, PhD, FIML, FCHSM, FFPHRCP (UK),  
12 7 FACSS, Hon FRACMA, FAHMS

13 8 Ms Jessica Herkes (JH)<sup>1</sup>, BSc (Adv), MRes

14 9 Dr Kate Churruca (KC)<sup>1</sup>, BA (Hons) Psych, PhD

15 10 Dr Janet C Long (JCL)<sup>1</sup>, BSc (Hons), MN (Ed), CertOphNurs, PhD, FISQua

16 11 Ms Chiara Pomare (CP)<sup>1</sup>, BPsych (Hons), MRes

17 12 Ms Claire Boyling (CB)<sup>1</sup>, BHSc (Health Promotion)

18 13 Ms Mia Bierbaum (MB)<sup>1</sup>, BSc (Biomedical), B.Ed, Grad Dip TESOL, MPH

19 14 Dr Robyn Clay-Williams (RC-W)<sup>1</sup>, BEng, PhD

20 15 Professor Frances Rapport (FR)<sup>1</sup>, BA (Hons), Cert Ed, FRSA, MPhil, PhD

21 16 Dr Patti Shih (PS)<sup>1</sup>, BA(Hons), M.Pub.Pol., PhD

22 17 Dr Anne Hogden (AH)<sup>1</sup>, BA (Hons), B SpPath, PhD, FISQua

23 18 Dr Louise A Ellis (LAE)<sup>1</sup>, BPsych (Hons), PhD

24 19 Ms Kristiana Ludlow (KL)<sup>1</sup>, BPsych (Hons), MRes

25 20 Dr Elizabeth Austin (EA)<sup>1</sup>, BA (Hons) Psych, PhD

26 21 Ms Rebecca Seah (RS)<sup>1</sup>, BSc Psychology (Hons I) Bcomm

27 22 Ms Elise McPherson (EM)<sup>1</sup>, BA, BSc(Hons)

28 23 Mr Peter Hibbert (PH)<sup>1</sup>, B.App.Sc (Physio), Grad.Dip. Comp, Grad.Dip. Econ, FAAQHC

29 24 Professor Johanna I Westbrook (JIW)<sup>1</sup>, BAppSc, GradDipAppEpid, MHA, PhD

30 25

31 26 <sup>1</sup>Australian Institute of Health Innovation, Macquarie University, Sydney, Australia

32 27

33 28 **\*Corresponding Author**

34 29 Level 6, 75 Talavera Rd

35 30 Macquarie University, North Ryde

36 31 New South Wales, Australia, 2109

37 32

38 33 **Word count:** 4528 exl. Abstract, tables, figures, references and acknowledgements

39 34

## 35 **ABSTRACT**

### 36 **Introduction**

37 Effective researcher assessment is key to decisions about funding allocations, promotion and  
38 tenure. In the age of ubiquitous data availability, however, weighing the achievements,  
39 impact and track record of researchers is a challenge. Despite increased interest in this issue,  
40 there is a lack of clarity about what information to include and how.

### 41 **Objective**

42 We aimed to identify what is known about methods for assessing researcher achievements,  
43 drawing on this to propose a new composite assessment model.

### 44 **Methods**

45 A set of inclusion criteria was applied to information gathered through a systematic search of  
46 Web of Science Core Collection, MEDLINE, and BIOSIS Citation Index review for literature  
47 published between 2007 and 2017. The research followed the Preferred Reporting Items for  
48 Systematic Review and Meta-Analysis Protocols (PRISMA-P) framework.

### 49 **Results**

50 Four hundred and seventy-eight articles were included in the final review. Established  
51 approaches, which had been developed prior to our inclusion period (e.g., citations and  
52 outputs, h-index, journal impact factor), remained dominant in the literature and in practice.  
53 There was a profusion of new bibliometric methods and models in the last 10 years including:  
54 measures based on PageRank algorithms or "altmetric" data, those purporting to improve  
55 upon existing methods to apply peer judgement, and novel techniques to assign values to  
56 publication quantity and quality. Each assessment method tended to prioritize certain aspects  
57 of achievement—academic productivity, quality of research, impact or popularity—over  
58 others.

### 59 **Conclusions**

60 Judging researchers' achievement is complex. All metrics and models focus on an element or  
61 elements, at the expense of others. Because of these issues, a new composite design, the  
62 Comprehensive Researcher Achievement Model (CRAM) is presented, which limits  
63 disadvantages with any one metric and supersedes past anachronistic models. The CRAM  
64 contains a blend of measures and is modifiable to a range of applications.

65  
66 **Keywords:** Researcher assessment; Research metrics; h-index; Journal impact factor;  
67 citations; outputs; Comprehensive Researcher Achievement Model (CRAM)

1  
2  
3 68 **Article Summary**  
4

5 69 **Strengths and limitations of this study**  
6

- 7 70 • A large dataset of over 478 articles, containing many ideas for assessing researcher  
8 performance, was analyzed  
9 71  
10 72 • A new model combining multiple factors to assess researcher performance is now  
11 available  
12 73  
13 74 • Its strengths include combining quantitative and qualitative components in the one  
14 model  
15 75  
16 76 • The CRAM model, despite being evidence-oriented, is a generic one and now needs  
17 to be applied in the field  
18 77  
19  
20  
21  
22  
23  
24  
25  
26  
27  
28  
29  
30  
31  
32  
33  
34  
35  
36  
37  
38  
39  
40  
41  
42  
43  
44  
45  
46  
47  
48  
49  
50  
51  
52  
53  
54  
55  
56  
57  
58  
59  
60

## 78 INTRODUCTION

79 Judging researchers' achievements and impact continues to be an important means of  
80 allocating scarce research funds and assessing candidates for promotion or tenure. It has  
81 historically been carried out through some form of expert peer judgement, including numbers  
82 and quality of outputs, and in more recent decades, citations to them. This approach requires  
83 judgements regarding the weight which should be assigned to the number of publications,  
84 their quality, where they were published, and their downstream influence or impact. There are  
85 significant questions about the extent to which human judgement based on these criteria is an  
86 effective mechanism for making these complex assessments in a consistent and unbiased  
87 way.[1-3] Criticisms of peer assessment, even when underpinned by relatively impartial  
88 productivity data, include the propensity for bias, inconsistency among reviewers, nepotism,  
89 group-think and subjectivity.[4-7]

90 To compensate for these limitations, approaches have been proposed that rely less on  
91 subjective judgement and more on objective indicators.[3, 8-10] Indicators of achievement  
92 focus on one or a combination of four aspects: quantity of researcher outputs (*productivity*);  
93 value of outputs (*quality*); outcomes of research outputs (*impact*); and relations between  
94 publications or authors and the wider world (*influence*).[11-15] Online publishing of journal  
95 articles has provided the opportunity to easily track citations and user interactions (e.g.,  
96 number of article downloads) and thus has provided a new set of indices against which  
97 individual researchers, journals and articles can be compared and the relative worth of  
98 contributions assessed and valued.[14] These relatively new metrics have been collectively  
99 termed *bibliometrics*[16] when based on citations and numbers of publications, or  
100 *altmetrics*[17] when calculated by alternative online measures of impact such as number of  
101 downloads or social media mentions.[16]

102 The most established metrics for inferring researcher achievement are the h-index and  
103 the Journal Impact Factor (JIF). The JIF measures the average number of citations of an  
104 article in the journal over the previous year, and hence is a good indication of journal quality  
105 but is increasingly regarded as a primitive measure of quality for individual researchers.[18]  
106 The h-index, proposed by Hirsch in 2005,[19] attempts to portray a researcher's productivity  
107 and impact in one data point. The h-index is defined as the number (*h*) of articles published  
108 by a researcher that have received a citation count of at least *h*. Use of the h-index has  
109 become widespread, reflected in its inclusion in author profiles on online databases such as  
110 Google Scholar and Scopus.

1  
2  
3 111 Also influenced by the advent of online databases, there has been a proliferation of  
4 112 other assessment models and metrics,[16] many of which purport to improve upon existing  
5 113 approaches.[20, 21] These include methods that assess the impact of articles measured by:  
6 114 downloads or online views received; practice change related to specific research: take-up by  
7 115 the scientific community; or mentions in social media.

8  
9  
10  
11 116 Against the backdrop of growth in metrics and models for assessing researchers'  
12 117 achievements, there is a lack of guidance on the relative strengths and limitations of these  
13 118 different approaches. Understanding them is of fundamental importance to funding bodies  
14 119 that drive the future of research, tenure and promotion committees, and more broadly for  
15 120 providing insights into how we recognize and value the work of medical science and  
16 121 scientists. This review identifies approaches to assessing researchers' achievements published  
17 122 in the academic literature over the last 10 years, considering their relative strengths and  
18 123 limitations.

19  
20  
21  
22  
23  
24 124

## 25 26 125 **METHOD**

### 27 28 126 **Search Strategy**

29  
30  
31 127 Web of Science databases (including Web of Science Core Collection, MEDLINE, and  
32 128 BIOSIS Citation Index) were searched using terms related to researcher achievement  
33 129 (*researcher excellence, track record, researcher funding, researcher perform\*, relative to*  
34 130 *opportunity, researcher potential, research\* career pathway, academic career pathway,*  
35 131 *funding system, funding body, researcher impact, scientific\* productivity, academic*  
36 132 *productivity, top researcher, researcher ranking, grant application, researcher output,*  
37 133 *h\*index, i\*index, impact factor, individual researcher*) and approaches to its assessment  
38 134 (*model, framework, assess\*, evaluat\*, \*metric\*, measur\*, criteri\*, citation\*, unconscious*  
39 135 *bias, rank\**) with “\*” used as an unlimited truncation to capture variation in search terms.  
40 136 These two searches were combined (using “and”) and results were downloaded into  
41 137 EndNote, the reference management software.

### 42 43 44 45 138 **Study Selection**

46  
47  
48  
49  
50  
51 139 After removing duplicate references in EndNote,[22] articles were allocated amongst pairs of  
52 140 reviewers (MB-JCL, CP-CB, KL-JH, KC-LAE) for screening against inclusion criteria.  
53 141 Following established procedures,[23, 24] each pair was randomly assigned 5% of their  
54 142 allocation to review concurrently against inclusion criteria, with inter-rater reliability



1  
2  
3 143 assessed using Cohen's Kappa ( $\kappa$ ). The  $\kappa$  statistic was calculated for pairs of researchers, with  
4 144 agreement ranging from moderate to almost perfect (0.4848-0.9039).[25] Following the  
5  
6 145 abstract and title screen, selected articles underwent full text review. Reasons for exclusion  
7  
8 146 were recorded.

### 10 147 **Inclusion Criteria**

11  
12 148 The following inclusion criteria were operationalized: (1) English language, (2) published in  
13  
14 149 the last 10 years (2007-2017), (3) full text for the article was available, and (4) the article  
15  
16 150 discussed an approach to the assessment of an individual researcher's achievements (at the  
17  
18 151 researcher or singular output-level). The research followed the Preferred Reporting Items for  
19  
20 152 Systematic Review and Meta-Analysis Protocols (PRISMA-P) framework.[26] Empirical and  
21  
22 153 non-empirical articles were included, because many articles proposing new approaches to  
23  
24 154 assessment, or discussing the limitations of existing ones, are not level one evidence or  
25  
26 155 research-based.

### 26 156 **Data Extraction**

27  
28 157 Data from the included articles were extracted, including: the country of article origin, the  
29  
30 158 characteristics of the models or metrics discussed, the perspective the article presented on the  
31  
32 159 metric or model (positive, negative, indeterminable) including any potential benefits or  
33  
34 160 limitations of the assessment model (and if these were perceived or based on some form of  
35  
36 161 evidence). A custom data extraction sheet was developed in Microsoft Excel, trialed among  
37  
38 162 members of the research team and subsequently refined. This information was synthesized  
39  
40 163 for each model and metric identified through narrative techniques. The publication details  
41  
42 164 and classification of each paper are contained in **Appendix 1**.

### 42 165 **Appraisal of the Literature**

43  
44 166 Due to the prevalence of non-empirical articles in this field (e.g., editorial contributions,  
45  
46 167 commentaries), it was determined that a risk of bias tool such as the Quality Assessment Tool  
47  
48 168 could not be applied.[27] Rather, assessors were trained in multiple meetings (October 24,  
49  
50 169 October 30, November 13, 2017) to critically assess the quality of articles. Given the nature  
51  
52 170 of the topic (in relation to the publication process) the type of models and metrics identified  
53  
54 171 (i.e., more metrics that use publication metrics) may influence the cumulative evidence and  
55  
56 172 subsequently create a risk of bias. In addition, three researchers (JH, EM, CB) reviewed every  
57  
58 173 included article, to extract documented conflicts of interests of authors.

174 **RESULTS**

175 The final dataset consisted of 478 academic articles. The data screening process is presented  
176 in **Figure 1**.

177 **Figure 1. Data screening and extraction process for academic articles**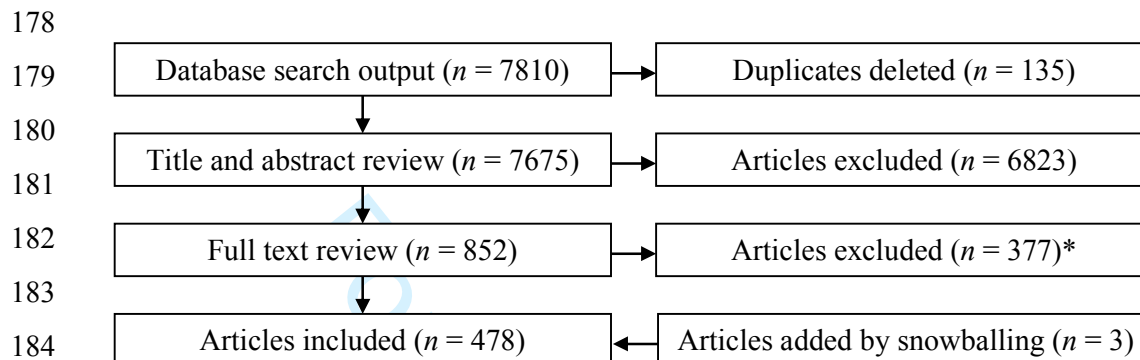185  
186 **\*Reasons for exclusion are noted below**

| Reason for exclusion at the full text level             | Number of articles excluded |
|---------------------------------------------------------|-----------------------------|
| Not in English language                                 | 47                          |
| Full text not available                                 | 62                          |
| Does not discuss assessment of an individual researcher | 268                         |
| <b>Total</b>                                            | <b>377</b>                  |

187

188 Of the 478 included papers (see **Appendix 1** for a summary), 295 (61.7%) had an  
189 empirical component, which ranged from interventional studies that assessed researcher  
190 achievement as an outcome measure (e.g., a study measuring the outcomes of a training  
191 program),[28] as a predictor[29-31] (e.g., a study that demonstrated the association between  
192 number of citations early in one's career and later career productivity), or reported a  
193 descriptive analysis of a new metric.[32, 33] One hundred and sixty-six (34.7%) papers were  
194 not empirical, including editorial/opinion contributions that discussed the assessment of  
195 research achievement, or proposed models for assessing researcher achievement. Seventeen  
196 papers (3.6%) were reviews that considered one or more elements of assessing researcher  
197 achievements. The quality of these contributions ranged in terms of the risk of bias in the  
198 viewpoint expressed. Only for 19 papers (4.0%) did the authors declare a potential conflict of  
199 interest.

200 Across the study period, 78 articles (16.3%) involved authors purporting to propose  
201 new models or metrics. Most articles described or cited pre-existing metrics and largely  
202 discussed their perceived strengths and limitations. **Figure 2** shows the proportion of positive  
203 or negative discussions of five of the most common approaches to assessing an individual's  
204 research achievement (altmetrics, peer-review, h-index, simple counts, and JIF). The  
205 approach with most support was altmetrics (51.0% of articles mentioning altmetrics). The JIF  
206 was discussed with mostly negative sentiments in relevant articles (69.4%).

207  
208 **Figure 2. Percentages of positive and negative discussion regarding selected commonly**  
209 **used metrics for assessing individual researchers (n=478 articles)**

210 [Insert Figure 2 here]

211

212 **Citation-Based Metrics**

213 ***Publication and Citation Counts***

214 One hundred and fifty-three papers (32.0%) discussed the use of publication and citation  
215 counts for purposes of assessing researcher achievement, with papers describing them as a  
216 simple “traditional but somewhat crude measure”,<sup>[34]</sup> as well as the building blocks for other  
217 metrics.<sup>[35]</sup> A researcher's number of publications, commonly termed an n-index,<sup>[36]</sup> was  
218 suggested by some to indicate researcher productivity,<sup>[14]</sup> rather than quality or influence of  
219 these papers.<sup>[37]</sup> On the other hand, the literature suggested that numbers of citations  
220 indicated the influence of an individual publication or at researcher-level, as an author's  
221 cumulative number received across their body of work or mean citations per article.<sup>[38]</sup>  
222 Some studies found support for the validity of citation counts and publications in that they  
223 were correlated with other indications of a researcher's achievement, such as awards and  
224 grant funding,<sup>[39, 40]</sup> and predictive of long term success in a field.<sup>[41]</sup> For example, one  
225 paper argued that having larger numbers of publications and being highly cited early in one's  
226 career predicted later high quality research.<sup>[42]</sup>

227 A number of limitations of using citation or publication counts was observed. For  
228 example, Minasny et al. (2013) highlighted discrepancies between publications and citations  
229 counts in different databases because of their differential structures and inputs.<sup>[43]</sup> Other  
230 authors<sup>[38, 44, 45]</sup> noted that citation patterns vary by discipline, which they suggested can  
231 make them inappropriate for comparing researchers from different fields. Average citations

1  
2  
3 232 per publication were reported as highly sensitive to change or could be skewed if, for  
4 233 example, a researcher has one heavily-cited article.[46, 47] A further disadvantage is the lag-  
5 234 effect of citations,[48, 49] and that in most models citations and publications count equally  
6 235 for all co-authors, despite potential differential contributions.[50] Some also questioned the  
7 236 extent to which citations actually indicated quality or impact, noting that a paper may  
8 237 influence clinical practice more than academic thinking.[51] Indeed, a paper may be highly  
9 238 cited because it is useful (e.g., a review), controversial, or even by chance, making citations a  
10 239 limited indication of quality or impact.[40, 50, 52] In addition to limitations, numerous  
11 240 authors made the point that focusing on citation and publication counts can have unintended,  
12 241 negative consequences for the assessment of researcher achievement, potentially leading to  
13 242 gaming and manipulation, including self-citations and gratuitous authorship.[53, 54]

### 21 243 *Singular Output-Level Approaches*

22 244 Forty-one papers (8.6%) discussed models and metrics at the singular output or article-level  
23 245 that could be used to infer researcher achievement. The components of achievement they  
24 246 reported assessing were typically quality or impact.[55, 56] For example, some papers  
25 247 reported attempts to examine the quality of a single article by assessing its content.[57, 58]  
26 248 Among the metrics identified in the literature, the immediacy index (II) focused on impact by  
27 249 measuring the average number of cites an article received in the year it was published.<sup>[59]</sup>  
28 250 Similarly, Finch suggested adapting the Source Normalized Impact per Publication (SNIP; a  
29 251 metric used for journal-level calculations across different fields of research) to an article-  
30 252 level.[21]

31 253 Many of the article-level metrics identified could also be upscaled to produce  
32 254 researcher-level indications of achievement. For example, the sScientific currENcy Tokens  
33 255 (CENTs), proposed by Szymanski et al. (2012), involved giving a “cent” for each new non-  
34 256 self-citation a publication received; CENTs are then used as the basis for the researcher-level  
35 257 i-index, which follows a similar approach as the h-index, but removes self-citations.[60] The  
36 258 TAPSIF (Temporally-Averaged Paper-Specific Impact Factor) calculates an article’s average  
37 259 number of citations per year combined with bonus cites for the publishing journal’s prestige,  
38 260 and can be aggregated to measure the overall relevance of a researcher (Temporally  
39 261 Averaged Author-Specific Impact Factor; TAASIF).[61]

### 40 262 *Journal impact factor*

1  
2  
3 263 The JIF, commonly recognized as a journal-level measure of quality,[59, 62-64] was  
4 264 discussed in 211 (44.1%) of the papers reviewed in relation to assessing singular outputs or  
5  
6 265 individual researchers. A number of papers described the JIF being used informally to assess  
7  
8 266 an individual's research achievement at the singular output-level, and formally in countries  
9  
10 267 such as France and China.[65] It implies article quality because it is typically a more  
11  
12 268 competitive process to publish in journals with high impact factors.[66] Indeed, the JIF was  
13  
14 269 found to be the best predictor of a paper's propensity to receive citations.[67]

15  
16 270 The JIF has a range of limitations when used to indicate journal quality,[68] including  
17  
18 271 that it is disproportionately affected by highly cited, outlier articles,[41, 69] and is susceptible  
19  
20 272 to "gaming" by editors.[17, 70] Other criticisms focused on using the JIF to assess individual  
21  
22 273 articles or the researchers who author them.[71] Some critics claimed that using the JIF to  
23  
24 274 measure an individual's achievement encourages researchers to publish in higher-impact but  
25  
26 275 less-appropriate journals for their field—which ultimately means their article may not be read  
27  
28 276 by relevant researchers.[72, 73] Furthermore, the popularity of a journal was argued to be a  
29  
30 277 poor indication of the quality of any one article, with the citation distributions for calculating  
31  
32 278 JIF found to be heavily skewed (i.e., a small subset of papers receive the bulk of the citations  
33  
34 279 while some may receive none).[18] Ultimately, many commentators argued that the JIF is an  
35  
36 280 inappropriate metric to assess individual researchers because it is an aggregate metric of a  
37  
38 281 journal's publication, and expresses nothing about any individual paper.[21, 49, 50, 74]  
39  
40 282 However, Bornmann et al. (2017) suggested one case in which it would be appropriate to use  
41  
42 283 JIF for assessing individual researchers: in relation to their recently published papers that had  
43  
44 284 not had the opportunity to accumulate citations.[75]

### 45 285 ***Researcher-Level Approaches***

#### 46 286 *h-index*

47  
48 287 The h-index was among the most commonly discussed metrics in the literature (254 [53.1%]  
49  
50 288 of the papers reviewed); in many of these papers, it was described by authors as more  
51  
52 289 sophisticated than citation and publication counts, but still straightforward, logical and  
53  
54 290 intuitive.[76-78] Authors noted its combination of productivity (h publications) and impact  
55  
56 291 indicators (h citations) as being more reliable[79, 80] and stable than average citations per  
57  
58 292 publications[41] because it is not skewed by the influence of one popular article.[81] One  
59  
60 293 study found that the h-index correlated with other metrics more difficult to obtain.[78] It also

1  
2  
3 294 showed convergent validity with peer-reviewed assessments[82] and was found to be a good  
4 295 predictor of future achievement.[41]

6 296 However because of the lag-effect with citations and publications, the h-index  
7 297 increases with a researcher's years of activity in the field, and cannot decrease, even if  
9 298 productivity later declines.[83] Hence, numerous authors suggested it was inappropriate for  
11 299 comparing researchers at different career stages,[84] or those early in their career.[70] The h-  
12 300 index was also noted as being susceptible to many of the critiques leveled against citation  
14 301 counts, including potential for gaming, and inability to reflect differential contributions by  
16 302 co-authors.[85] Because disciplines differ in citation patterns[86] some studies noted  
18 303 variations in author h-indices between different methodologies[87] and within medical  
20 304 subspecialties.[88] Some therefore argued that the h-index should not be used as the sole  
21 305 measure of a researcher's achievement.[88]

#### 23 306 *h-index variants*

25 307 A number of modified versions of the h-index were identified; these purported to draw on its  
27 308 basic strengths of balancing productivity with impact while redressing perceived limitations.  
29 309 For example, the g-index measures global citation performance,[89] and was defined  
31 310 similarly to the h-index but with more weight given to highly cited articles by assuming the  
32 311 top g articles have received at least  $g^2$  citations.[90] Azer and Azer (2016) argued it was a  
33 312 more useful measure of researcher productivity.[91] Another variant of the h-index identified,  
35 313 the m-quotient, was suggested to minimize the potential to favor senior academics by  
36 314 accounting for the time passed since a researcher has begun publishing papers.[92, 93] Other  
38 315 h-index variations reported in the articles reviewed attempted to account for author  
40 316 contributions, such as the h-maj index, which includes only articles in which the researcher  
41 317 played a core role (based on author order); and the weighted h-index, which assigns credit  
43 318 points according to author order.[89, 94]

#### 45 319 ***Recurring Issues with Citation-Based Metrics***

47 320 The literature review results suggested that no one citation-based metric was ideal for all  
49 321 purposes. All of the common metrics examined focused on one aspect of an individual's  
51 322 achievement, and thus failed to account for other aspects of achievement. The limitations  
52 323 with some of the frequently used citation-based metrics are listed in **Box 1**.

54 324



1. Challenges with reconciling differences in citation patterns across varying fields of study
2. Time-dependency issues stemming from differences in career length of researchers
3. Prioritizing impact over merit, or quality over quantity, or vice versa
4. The lag-effect of citations
5. Gaming and the ability of self-citation to distort metrics
6. Failure to account for author order
7. Contributions from publications are viewed as equal when they may not be
8. Perpetuate “publish or perish” culture
9. Potential to stifle innovation in favor of what is popular

325 **Box 1. Common limitations in the use of citation-based metrics**

326 **Non-Citation Based Approaches**

327 *altmetrics*

328 In contradistinction with the metrics discussed above, fifty-four papers (11.3%) discussed  
 329 altmetrics (or “alternative metrics”), which included a wide range of techniques to measure  
 330 non-traditional, non-citation based usage of articles.[17] Altmetric measures included the  
 331 number of online article views,[95] bookmarks,[96] downloads,[41] PageRank  
 332 algorithms[97] and attention by mainstream news,[65] in books[98] and social media, for  
 333 example, in blogs, commentaries, online topic reviews or tweets.[99, 100] These metrics  
 334 typically measure the “web visibility” of an output.[101]

335 A strength of altmetrics lies in providing a measure of impact promptly after  
 336 publication.[70, 102, 103] Moreover, altmetrics allows tracking of the downloads of multiple  
 337 sources (e.g., students, the general public, clinicians, as well as academics) and multiple types  
 338 of format (e.g., reports and policy documents),[104] which are useful in gauging a broader  
 339 indication of impact or influence, compared to more traditional metrics that solely or largely  
 340 measure acknowledgement by experts in the field through citations.[17]

341 Disadvantages noted in the articles reviewed included that altmetrics calculations  
 342 have been established by commercial enterprises such as *Altmetrics LLC (London, UK)* and  
 343 other competitors,[105] and there may be fees levied for their use. The application of these  
 344 metrics has also not been standardized.[98] Furthermore, it has been argued that, because  
 345 altmetrics are cumulative and typically at the article-level, they provide more an indication of  
 346 impact or even popularity,[106] instead of quality or productivity.[107] Hence, one study

1  
2  
3 347 suggested no correlation between attention on Twitter and expert analysis of an article's  
4 348 originality, significance or rigour.[108] Another showed that Tweets predict citations.[109]  
5  
6 349 Overall, further work needs to assess the value of altmetric scores in terms of their  
7  
8 350 association with other traditional indicators of achievement.[110] Notwithstanding this, there  
9  
10 351 were increasing calls to consider altmetrics alongside more conventional metrics in assessing  
11  
12 352 researchers and their work.[111]  
13

353

### 354 ***Past Funding***

16 355 A past record of being funded by national agencies was identified as a common measurement  
17  
18 356 of individual academic achievement in a number of papers, and has been argued to be a  
19  
20 357 reliable method that is consistent across medical research.[112-114] For example, the NIH's  
21  
22 358 (National Institute of Health's) RePORT (Research Portfolio Online Reporting Tools) system  
23  
24 359 encourages public accountability for funding by providing online access to reports, data and  
25  
26 360 NIH-funded research projects.[112, 115]  
27

361

### 362 **New Metrics and Models identified**

30 363 The review also identified and assessed new metrics and models that were proposed during  
31  
32 364 the review period, many of which had not gained widespread acceptance or use. While there  
33  
34 365 was considerable heterogeneity and varying degrees of complexity among the 78 new  
35  
36 366 approaches identified, there were also many areas of overlap in their methods and purposes.  
37  
38 367 For example, some papers reported on metrics that used a PageRank algorithm,[116, 117] a  
39  
40 368 form of network analysis based on structural characteristics of publications (e.g., co-  
41  
42 369 authorship or citation patterns).[14] Metrics based on PageRank purported to measure both  
43  
44 370 the direct and indirect impact of a publication or researcher. Other approaches considered the  
45  
46 371 relative contributions of authors to a paper in calculating productivity.[118] Numerous  
47  
48 372 metrics and models that built upon existing approaches were also reported.[119] For example,  
49  
50 373 some developed composite metrics that included a publication's JIF alongside an author  
51  
52 374 contribution measure[120] or other existing metrics.[121] However, each of these approaches  
53  
54 375 reported limitations, in addition to their strengths or improvements upon other methods. For  
55  
56 376 example, in focusing on productivity, a metric necessarily often neglected impact.[122]

53 377 **Appendix 2** provides a summary of these new or re-fashioned metrics and models, with  
54  
55 378 details of their basis and purpose.  
56

379



380

381 **DISCUSSION**

382 This systematic review identified a large number of diverse metrics and models for assessing  
383 an individual's research achievement that have been developed in the last 10 years (2007-  
384 2017), as evidenced in **Appendix 2**. At the same time, other approaches that pre-dated our  
385 study time period were also discussed frequently in the literature reviewed, including the h-  
386 index and JIF. All metrics and models proposed had their relative strengths, based on the  
387 components of achievement they focused on, and their sophistication or transparency.

388

389 **Strengths and limitations**

390 The review also identified and assessed new metrics and Over the past few decades,  
391 peer-review has been increasingly criticized for reliance on subjectivity and propensity for  
392 bias,[7] and there have been arguments that the use of specific metrics may be a more  
393 objective and fair approach for assessing individual research achievement. However, this  
394 review has highlighted that even seemingly objective measures have a range of shortcomings.  
395 For example, there are inadequacies in comparing researchers at different career stages, and  
396 across disciplines with different citation patterns.[86] Furthermore, the use of citation-based  
397 metrics can lead to gaming and potential ethical misconduct by contributing to a “publish or  
398 perish” culture in which researchers are under pressure to maintain or improve their  
399 publication records.[123, 124] New methods and adjustments to existing metrics have been  
400 proposed to explicitly address some of these limitations; for example, normalizing metrics  
401 with “exchange rates” to remove discipline-specific variation in citation patterns, thereby  
402 making metric scores more comparable for researchers working in disparate fields.[125, 126]  
403 Normalization techniques have also been used to assess researchers' metrics with greater  
404 recognition of their relative opportunity and career longevity.[127]

405

406 Other criticisms of traditional approaches center less on how they calculated  
407 achievement, and more on what they understood or assumed about its constituent elements.  
408 In this review, the measurement of impact or knowledge gain was often exclusively tied to  
409 citations.[128] Some articles proposed novel approaches to using citations as a measure of  
410 impact, such as giving greater weight to citations from papers that were themselves highly  
411 cited[129] or that come from outside the field in which the paper was published.[130]  
412 However, even other potential means of considering scientific contributions and achievement,

1  
2  
3 412 such as mentoring, were still ultimately tied to citations because mentoring was measured by  
4 413 the publication output of mentees.[131]

5  
6 414 A focus only on citations was widely thought to disadvantage certain types of  
7  
8 415 researchers. For example, researchers who aim to publish with a focus on influencing practice  
9  
10 416 may target “lower-impact”, more specialized or regional journals that are not necessarily  
11  
12 417 highly cited, where their papers will be read by the appropriate audience and findings  
13  
14 418 implemented.[51] In this regard, categorizing the type of journal in which an article has been  
15  
16 419 published, in terms of its focus (e.g., industry, clinical, regional/national), may go some way  
17  
18 420 toward recognizing those publications that have a clear knowledge translation intention.[123]  
19  
20 421 There were only a few other approaches identified that captured broader conceptualizations  
21  
22 422 of knowledge gain, such as practical impact or wealth generation for the economy, and these  
23  
24 423 too were often simplistic, such as including patents and their citations[132] or altmetric  
25  
26 424 data.[98] While altmetrics hold potential in this regard, their use has not been  
27  
28 425 standardized,[98] and they come with their own limitations, with suggestions that they reflect  
29  
30 426 popularity more so than real world impact.[106] Other methodologies have been proposed for  
31  
32 427 assessing knowledge translation, but these can often be labor intensive.[133] For example,  
33  
34 428 Sutherland et al. (2011)[134] suggested that assessing individual research outputs in light of  
35  
36 429 specific policy objectives, through peer-review based scoring, may be a strategy, but this is  
37  
38 430 typically not feasible in situations such as grant funding allocation, where there are time-  
39  
40 431 constraints and large applicant pools to assess.

41  
42 432 In terms of how one can make sense of the validity of many of these emerging  
43  
44 433 approaches for assessing an individual’s research achievements, metrics should demonstrate  
45  
46 434 their legitimacy empirically, as well as having a theoretical basis for their use and clearly  
47  
48 435 differentiating what aspects of quality, achievement or impact they purport to examine.[55,  
49  
50 436 67] If the recent, well-publicized[135-137] San Francisco Declaration on Research  
51  
52 437 Assessment (DORA)[138] is anything to go by, internationally there is a move away from the  
53  
54 438 assessment of individual researchers using the JIF and the journal in which the research has  
55  
56 439 been published.

57 440

### 58 441 **Figure 3. The Comprehensive Researcher Achievement Model (CRAM)**

59 442 [Insert Figure 3 Here]

60 443

61 444 There is momentum, instead, for assessment of researcher achievements on the basis  
62 445 of a wider mix of measures, hence our proposed Comprehensive Researcher Achievement

1  
2  
3 446 Model (CRAM) (**Figure 3**). On the left-hand side of this model is the researcher to be  
4 447 assessed, and key characteristics that influence the assessment. Among these factors, some  
5 448 (i.e., field or discipline, co-authorship, career longevity) can be controlled for depending on  
6 449 the metric, while other components, such as gaming or the research topic (i.e., whether it is  
7 450 “trendy” or innovative) are less amenable to control or even prediction. Online databases,  
8 451 which track citations and downloads and measure other forms of impact, hold much potential  
9 452 and will likely be increasingly used in the future to assess both individual researchers and  
10 453 their outputs. Hence, assessment components (past funding, articles, citations, patents,  
11 454 downloads, and some media traction) included in our model are those primarily accessible  
12 455 online.

13  
14 456 The findings of this review suggest assessment components should be used with care,  
15 457 and with recognition of how they can be influenced by other factors, and what aspects of  
16 458 achievement they reflect (i.e., productivity, quality, impact, influence). No metric or model  
17 459 singularly captures all aspects of achievement, and hence use of a range, such as the  
18 460 examples in our model, is advisable. Finally, this model recognizes that the configuration and  
19 461 weighting of assessment methods will depend on the assessors and their purpose, the  
20 462 resources available for the assessment process, and access to assessment components.  
21 463 However, these results must be interpreted in light of our focus only on academic literature in  
22 464 the review; this may have led to a more publication concentrated model.  
23  
24  
25  
26  
27  
28  
29  
30  
31  
32  
33  
34  
35

## 36 466 **CONCLUSION**

37  
38 467 There is no ideal model or metric by which to assess individual researcher achievement. We  
39 468 have proposed a generic model, designed to minimize risk of the use of any one or a smaller  
40 469 number of metrics, but it is not proposed as an ultimate solution. The mix of assessment  
41 470 components and metrics will depend on the purpose. Greater transparency in approaches used  
42 471 to assess achievement including their evidence-base is required.[37] Any model used to  
43 472 assess achievement for purposes such as promotion or funding allocation should include  
44 473 some quantitative components, based on robust data, and be able to be rapidly updated,  
45 474 presented with confidence intervals, and normalized.[37] The assessment process should be  
46 475 difficult to manipulate, and explicit about the components of achievement being measured.  
47 476 As such, no current metric suitably fulfills all these criteria. The best strategy to assess an  
48 477 individual’s research achievement is likely to involve the use of multiple approaches[139] in  
49 478 order to dilute the influence and potential disadvantages of any one metric, while providing  
50  
51  
52  
53  
54  
55  
56  
57  
58  
59  
60

1  
2  
3 479 more rounded picture of a researcher's achievement;[85, 140] this is what the CRAM aims to  
4 480 contribute.

5  
6 481 All-in-all, achievement in terms of impact and knowledge gain is broader than the  
7  
8 482 number of articles published or their citation rates, and yet most metrics have no means of  
9  
10 483 factoring in these broader issues. Altmetrics hold promise in complementing citation-based  
11  
12 484 metrics and assessing more diverse notions of impact, but usage of this type of tool requires  
13  
14 485 further standardization.[98] Finally, despite the limitations of peer-review, the role of expert  
15  
16 486 judgement should not be discounted.[41] Metrics are perhaps best applied as a complement or  
17  
18 487 check on the peer-review process, rather than the sole means of assessment of an individual's  
19  
20 488 research achievements.[141]  
21  
22  
23  
24  
25  
26  
27  
28  
29  
30  
31  
32  
33  
34  
35  
36  
37  
38  
39  
40  
41  
42  
43  
44  
45  
46  
47  
48  
49  
50  
51  
52  
53  
54  
55  
56  
57  
58  
59  
60

1  
2  
3 489 **Acknowledgements**

4 490 None.

5  
6 491

7  
8 492 **Competing Interests**

9 493 The authors have declared that no competing interests exist.

10  
11 494

12  
13 495 **Funding**

14 496 This work was funded by the Australian National Health and Medical Research Council  
15  
16 497 (NHMRC) for work related to an assessment of its peer review processes being conducted by  
17  
18 498 the Council. Staff of the Australian Institute of Health Innovation undertook this systematic  
19  
20 499 review for Council as part of that assessment. Other than specifying what they would like to  
21  
22 500 see from a literature review, NHMRC had no role in the conduct of the systematic review, or  
23  
24 501 the decision to publish.

25  
26 502

27 503 **Data sharing statement**

28 504 All data has been made available as Appendices.

29  
30 505

31 506 **Author Contributions**

32 507 JB conceptualized and drafted the manuscript, revised it critically for important intellectual  
33  
34 508 content, and led the study.

35 509 JH, KC and JCL made substantial contributions to the design, analysis and revision of the  
36  
37 510 work and critically reviewed the manuscript for important intellectual content.

38 511 CP, CB, MB, RC-W, FR, PS, AH, LAE, KL, EA, RS and EM carried out the initial  
39  
40 512 investigation, sourced and analyzed the data and revised the manuscript for important  
41  
42 513 intellectual content.

43 514 PH and JIW critically commented on the manuscript, contributed to the revision and editing  
44  
45 515 of the final manuscript and reviewed the work for important intellectual content.

46 516 All authors approved the final manuscript as submitted and agree to be accountable for all  
47  
48 517 aspects of the work.

518 **REFERENCES**

- 519 1. Ibrahim N, Chaibi AH, Ben Ahmed M. New scientometric indicator for the  
520 qualitative evaluation of scientific production. *New Libr World*. 2015;116(11-12):661-  
521 76.
- 522 2. Aixela FJ, Rovira-Esteva S. Publishing and impact criteria, and their bearing on  
523 translation studies: in search of comparability. *Perspectives-Studies in Translatology*.  
524 2015;23(2):265-83.
- 525 3. Belter CW. Bibliometric indicators: opportunities and limits. *J Med Libr Assoc*.  
526 2015;103(4):219-21.
- 527 4. Frixione E, Ruiz-Zamarripa L, Hernandez G. Assessing individual intellectual output  
528 in scientific research: Mexico's national system for evaluating scholars performance  
529 in the humanities and the behavioral sciences. *PLOS One*. 2016;11(5): doi:  
530 10.1371/journal.pone.0155732.
- 531 5. Marzolla M. Assessing evaluation procedures for individual researchers: the case of  
532 the Italian national scientific qualification. *J Informetr*. 2016;10(2):408-38.
- 533 6. Marsh HW, Jayasinghe UW, Bond NW. Improving the peer-review process for grant  
534 applications-reliability, validity, bias, and generalizability. *Am Psychol*.  
535 2008;63(3):160-8.
- 536 7. Kaatz A, Magua W, Zimmerman DR, Carnes M. A quantitative linguistic analysis of  
537 national institutes of health R01 application critiques from investigators at one  
538 institution. *Acad Med*. 2015;90(1):69-75.
- 539 8. Aoun SG, Bendok BR, Rahme RJ, Dacey RG, Jr., Batjer HH. Standardizing the  
540 evaluation of scientific and academic performance in neurosurgery-critical review of  
541 the "h" index and its variants. *World Neurosurg*. 2013;80(5):E85-E90.
- 542 9. Hicks D, Wouters P, Waltman L, de Rijcke S, Rafols I. Bibliometrics: the Leiden  
543 Manifesto for research metrics. *Nature*. 2015;520(7548):429-31.
- 544 10. King J. A review of bibliometric and other science indicators and their role in  
545 research evaluation. *J Inf Sci*. 1987;13(5):261-76.
- 546 11. Abramo G, Cicero T, D'Angelo CA. A sensitivity analysis of researchers' productivity  
547 rankings to the time of citation observation. *J Informetr*. 2012;6(2):192-201.
- 548 12. Arimoto A. Declining symptom of academic productivity in the Japanese research  
549 university sector. *High Educ*. 2015;70(2):155-72.
- 550 13. Carey RM. Quantifying scientific merit is it time to transform the impact factor? *Circ*  
551 *Res*. 2016;119(12):1273-5.

- 1  
2  
3 552 14. Durieux V, Gevenois PA. Bibliometric indicators: quality measurements of scientific  
4 553 publication. *Radiology*. 2010;255(2):342-51.  
5  
6 554 15. Selvarajoo K. Measuring merit: take the risk. *Science*. 2015;347(6218):139-40.  
7  
8 555 16. Wildgaard L, Schneider JW, Larsen B. A review of the characteristics of 108 author-  
9 556 level bibliometric indicators. *Scientometrics*. 2014;101(1):125-58.  
10  
11 557 17. Maximin S, Green D. The science and art of measuring the impact of an article.  
12 558 *Radiographics*. 2014;34(1):116-8.  
13  
14 559 18. Callaway E. Publishing elite turns against impact factor. *Nature*. 2016;535(7611):210-  
15 560 1.  
16  
17 561 19. Hirsch JE. An index to quantify an individual's scientific research output. *Proc Natl*  
18 562 *Acad Sci USA*. 2005;102(46):16569-72.  
19  
20 563 20. Bollen J, Crandall D, Junk D, Ding Y, Boerner K. An efficient system to fund  
21 564 science: from proposal review to peer-to-peer distributions. *Scientometrics*.  
22 565 2017;110(1):521-8.  
23  
24 566 21. Finch A. Can we do better than existing author citation metrics? *Bioessays*.  
25 567 2010;32(9):744-7.  
26  
27 568 22. EndNote. Clarivate Analytics; 2017.  
28  
29 569 23. Schlosser RW. Appraising the quality of systematic reviews. *Focus: Technical Briefs*.  
30 570 2007;17:1-8.  
31  
32 571 24. Braithwaite J, Herkes J, Ludlow K, Testa L, Lamprell G. Association between  
33 572 organisational and workplace cultures, and patient outcomes: systematic review. *BMJ*  
34 573 *Open*. 2017;7(11):e017708.  
35  
36 574 25. Landis JR, Koch GG. The measurement of observer agreement for categorical data.  
37 575 *Biometrics*. 1977;33(1):159-74.  
38  
39 576 26. Shamseer L, Moher D, Clarke M, et al. Preferred reporting items for systematic  
40 577 review and meta-analysis protocols (PRISMA-P) 2015: elaboration and explanation.  
41 578 *BMJ*. 2015;2(349):g7647.  
42  
43 579 27. Hawker S, Payne S, Kerr C, Hardey M, Powell J. Appraising the evidence: reviewing  
44 580 disparate data systematically. *Qual Health Res*. 2002;12(9):1284-99.  
45  
46 581 28. Thorngate W, Chowdhury W. By the numbers: track record, flawed reviews, journal  
47 582 space, and the fate of talented authors. In: Kaminski B, Koloch G, editors. *Advances*  
48 583 *in Social Simulation: Proceedings of the 9th Conference of the European Social*  
49 584 *Simulation Association. Advances in Intelligent Systems and Computing*. 229.  
50 585 Heidelberg, Germany: Springer Berlin; 2014. p. 177-88.



- 1  
2  
3 586 29. Sood A, Therattil PJ, Chung S, Lee ES. Impact of subspecialty fellowship training on  
4 587 research productivity among academic plastic surgery faculty in the United States.  
5 588 *Eplasty*. 2015;15:e50.
- 6  
7  
8 589 30. Mutz R, Bornmann L, Daniel H-D. Testing for the fairness and predictive validity of  
9 590 research funding decisions: a multilevel multiple imputation for missing data  
10 591 approach using ex-ante and ex-post peer evaluation data from the Austrian science  
11 592 fund. *J Assoc Inf Sci Technol*. 2015;66(11):2321-39.
- 12  
13  
14 593 31. Rezek I, McDonald RJ, Kallmes DF. Pre-residency publication rate strongly predicts  
15 594 future academic radiology potential. *Acad Radiol*. 2012;19(5):632-4.
- 16  
17 595 32. Knudson D. Kinesiology faculty citations across academic rank. *Quest*.  
18 596 2015;67(4):346-51.
- 19  
20 597 33. Wang D, Song C, Barabasi A-L. Quantifying long-term scientific impact. *Science*.  
21 598 2013;342(6154):127-32.
- 22  
23  
24 599 34. Efron N, Brennan NA. Citation analysis of Australia-trained optometrists. *Clin Exp*  
25 600 *Optom*. 2011;94(6):600-5.
- 26  
27 601 35. Perlin MS, Santos AAP, Imasato T, Borenstein D, Da Silva S. The Brazilian scientific  
28 602 output published in journals: a study based on a large CV database. *J Informetr*.  
29 603 2017;11(1):18-31.
- 30  
31  
32 604 36. Stallings J, Vance E, Yang J, et al. Determining scientific impact using a  
33 605 collaboration index. *Proc Natl Acad Sci USA*. 2013;110(24):9680-5.
- 34  
35 606 37. Kreiman G, Maunsell JHR. Nine criteria for a measure of scientific output. *Front*  
36 607 *Comput Neurosci*. 2011;5(48): doi: 10.3389/fncom.2011.00048.
- 37  
38 608 38. Mingers J. Measuring the research contribution of management academics using the  
39 609 Hirsch-index. *J Oper Res Soc*. 2009;60(9):1143-53.
- 40  
41  
42 610 39. Halvorson MA, Finlay AK, Cronkite RC, et al. Ten-year publication trajectories of  
43 611 health services research career development award recipients: collaboration, awardee  
44 612 characteristics, and productivity correlates. *Eval Health Prof*. 2016;39(1):49-64.
- 45  
46 613 40. Stroebe W. The graying of academia: will it reduce scientific productivity? *Am*  
47 614 *Psychol*. 2010;65(7):660-73.
- 48  
49  
50 615 41. Agarwal A, Durairajanayagam D, Tatagari S, et al. Bibliometrics: tracking research  
51 616 impact by selecting the appropriate metrics. *Asian J Androl*. 2016;18(2):296-309.
- 52  
53 617 42. Jacob JH, Lehl S, Henkel AW. Early recognition of high quality researchers of the  
54 618 German psychiatry by worldwide accessible bibliometric indicators. *Scientometrics*.  
55 619 2007;73(2):117-30.



- 1  
2  
3 620 43. Minasny B, Hartemink AE, McBratney A, Jang H-J. Citations and the h-index of soil  
4 621 researchers and journals in the Web of Science, Scopus, and Google Scholar. *Peerj*.  
5 622 2013;1: doi: 10.7717/peerj.183.  
6  
7 623 44. Gorraiz J, Gumpenberger C. Going beyond citations: SERUM - a new tool provided  
8 624 by a network of libraries. *Liber Quarterly*. 2010;20(1):80-93.  
9  
10 625 45. van Eck NJ, Waltman L, van Raan AFJ, Klautz RJM, Peul WC. Citation analysis may  
11 626 severely underestimate the impact of clinical research as compared to basic research.  
12 627 *PLOS One*. 2013;8(4): doi: 10.1371/journal.pone.0062395.  
13  
14 628 46. Meho LI, Rogers Y. Citation counting, citation ranking, and h-index of human-  
15 629 computer interaction researchers: a comparison of Scopus and Web of Science. *J*  
16 630 *Assoc Inf Sci Technol*. 2008;59(11):1711-26.  
17  
18 631 47. Selek S, Saleh A. Use of h index and g index for American academic psychiatry.  
19 632 *Scientometrics*. 2014;99(2):541-8.  
20  
21 633 48. Kali A. Scientific impact and altmetrics. *Indian J Pharmacol*. 2015;47(5):570-1.  
22  
23 634 49. Neylon C, Wu S. Article-level metrics and the evolution of scientific impact. *PLOS*  
24 635 *Biol*. 2009;7(11): doi: 10.1371/journal.pbio.1000242.  
25  
26 636 50. Sahel J-A. Quality versus quantity: assessing individual research performance. *Sci*  
27 637 *Transl Med*. 2011;3(84): doi: 10.1126/scitranslmed.3002249.  
28  
29 638 51. Pinnock D, Whittingham K, Hodgson LJ. Reflecting on sharing scholarship,  
30 639 considering clinical impact and impact factor. *Nurse Educ Today*. 2012;32(7):744-6.  
31  
32 640 52. Eyre-Walker A, Stoletzki N. The assessment of science: the relative merits of post-  
33 641 publication review, the impact factor, and the number of citations. *PLOS Biol*.  
34 642 2013;11(10).  
35  
36 643 53. Ferrer-Sapena A, Sanchez-Perez EA, Peset F, Gonzalez L-M, Aleixandre-Benavent R.  
37 644 The Impact Factor as a measuring tool of the prestige of the journals in research  
38 645 assessment in mathematics. *Res Eval*. 2016;25(3):306-14.  
39  
40 646 54. Moustafa K. Aberration of the citation. *Account Res*. 2016;23(4):230-44.  
41  
42 647 55. Abramo G, D'Angelo CA. Refrain from adopting the combination of citation and  
43 648 journal metrics to grade publications, as used in the Italian national research  
44 649 assessment exercise (VQR 2011-2014). *Scientometrics*. 2016;109(3):2053-65.  
45  
46 650 56. Páll-Gergely B. On the confusion of quality with impact: a note on Pyke's m-index.  
47 651 *BioScience*. 2015;65(2):117.  
48  
49  
50  
51  
52  
53  
54  
55  
56  
57  
58  
59  
60

- 1  
2  
3 652 57. Niederkrotenthaler T, Dorner TE, Maier M. Development of a practical tool to  
4 653 measure the impact of publications on the society based on focus group discussions  
5 654 with scientists. *BMC Public Health*. 2011;11(588): doi: 10.1186/471-2458-11-588.  
6  
7 655 58. Kreines EM, Kreines MG. Control model for the alignment of the quality assessment  
8 656 of scientific documents based on the analysis of content-related context. *J Comput*  
9 657 *Syst Sci*. 2016;55(6):938-47.  
10  
11 658 59. DiBartola SP, Hinchcliff KW. Metrics and the scientific literature: deciding what to  
12 659 read. *J Vet Intern Med*. 2017;31(3):629-32.  
13  
14 660 60. Szymanski BK, Lluís de la Rosa J, Krishnamoorthy M. An internet measure of the  
15 661 value of citations. *J Inf Sci*. 2012;185(1):18-31.  
16  
17 662 61. Bloching PA, Heinzl H. Assessing the scientific relevance of a single publication over  
18 663 time. *S Afr J Sci*. 2013;109(9/10): doi: 10.1590/sajs.2013/20130063.  
19  
20 664 62. Benchimol Barbosa PR. Comments on paper by Thomas et al: how to evaluate  
21 665 "quality of publication". *Arq Bras Cardiol*. 2011;97(1):88-9.  
22  
23 666 63. Benchimol-Barbosa PR, Ribeiro RL, Barbosa EC. Further comments on the paper by  
24 667 Thomas et al: how to evaluate "quality of publication". *Arq Bras Cardiol*.  
25 668 2011;97(1):88.  
26  
27 669 64. Benchimol-Barbosa PR, Ribeiro RL, Barbosa EC. Additional comments on the paper  
28 670 by Thomas et al: how to evaluate "quality of publication". *Arq Bras Cardiol*.  
29 671 2011;97(1):88-9.  
30  
31 672 65. Slim K, Dupre A, Le Roy B. Impact factor: an assessment tool for journals or for  
32 673 scientists? *Anaesth Crit Care Pain Med*. 2017;36(6):347-8.  
33  
34 674 66. Diem A, Wolter SC. The use of bibliometrics to measure research performance in  
35 675 education sciences. *Res High Edu*. 2013;54(1):86-114.  
36  
37 676 67. Bornmann L, Leydesdorff L. Does quality and content matter for citedness? A  
38 677 comparison with para-textual factors and over time. *J Informetr*. 2015;9(3):419-29.  
39  
40 678 68. Santangelo GM. Article-level assessment of influence and translation in biomedical  
41 679 research. *Mol Biol Cell*. 2017;28(11):1401-8.  
42  
43 680 69. Ravenscroft J, Liakata M, Clare A, Duma D. Measuring scientific impact beyond  
44 681 academia: an assessment of existing impact metrics and proposed improvements.  
45 682 *PLOS One*. 2017;12(3).  
46  
47 683 70. Trueger NS, Thoma B, Hsu CH, et al. The altmetric score: a new measure for article-  
48 684 level dissemination and impact. *Ann Emerg Med*. 2015;66(5):549-53.

- 1  
2  
3 685 71. Welk G, Fischman MG, Greenleaf C, et al. Editorial board position statement  
4 686 regarding the declaration on research assessment (DORA) - recommendations with  
5 687 respect to journal impact factors. *Res Q Exerc Sport*. 2014;85(4):429-30.
- 6 688 72. Taylor DR, Michael LM, II, Klimo P, Jr. Not everything that matters can be measured  
7 689 and not everything that can be measured matters response. *J Neurosurg*.  
8 690 2015;123(3):544-5.
- 9 691 73. Christopher MM. Weighing the impact (factor) of publishing in veterinary journals. *J*  
10 692 *Vet Sci*. 2015;17(2):77-82.
- 11 693 74. Jokic M. H-index as a new scientometric indicator. *Biochemia Med*. 2009;19(1):5-9.
- 12 694 75. Bornmann L, Pudovkin AI. The journal impact factor should not be discarded. *J*  
13 695 *Korean Med Sci*. 2017;32(2):180-2.
- 14 696 76. Franceschini F, Galetto M, Maisano D, Mastrogiacomo L. The success-index: an  
15 697 alternative approach to the h-index for evaluating an individual's research output.  
16 698 *Scientometrics*. 2012;92(3):621-41.
- 17 699 77. Prathap G. Citation indices and dimensional homogeneity. *Curr Sci*. 2017;113(5):853-  
18 700 5.
- 19 701 78. Saad G. Applying the h-index in exploring bibliometric properties of elite marketing  
20 702 scholars. *Scientometrics*. 2010;83(2):423-33.
- 21 703 79. Duffy RD, Jadidian A, Webster GD, Sandell KJ. The research productivity of  
22 704 academic psychologists: assessment, trends, and best practice recommendations.  
23 705 *Scientometrics*. 2011;89(1):207-27.
- 24 706 80. Prathap G. Evaluating journal performance metrics. *Scientometrics*. 2012;92(2):403-  
25 707 8.
- 26 708 81. Lando T, Bertoli-Barsotti L. A new bibliometric index based on the shape of the  
27 709 citation distribution. *PLOS One*. 2014;9(12): doi: 10.1371/journal.pone.0115962.
- 28 710 82. Bornmann L, Wallon G, Ledin A. Is the h index related to (standard) bibliometric  
29 711 measures and to the assessments by peers? An investigation of the h index by using  
30 712 molecular life sciences data. *Res Eval*. 2008;17(2):149-56.
- 31 713 83. Pepe A, Kurtz MJ. A measure of total research impact independent of time and  
32 714 discipline. *PLOS One*. 2012;7(11):e46428.
- 33 715 84. Haslam N, Laham S. Early-career scientific achievement and patterns of authorship:  
34 716 the mixed blessings of publication leadership and collaboration. *Res Eval*.  
35 717 2009;18(5):405-10.

- 1  
2  
3 718 85. Ioannidis JPA, Klavans R, Boyack KW. Multiple citation indicators and their  
4 719 composite across scientific disciplines. *PLOS Biol.* 2016;14(7): doi:  
5 720 10.1371/journal.pbio.1002501.  
6  
7 721 86. van Leeuwen T. Testing the validity of the Hirsch-index for research assessment  
8 722 purposes. *Res Eval.* 2008;17(2):157-60.  
9  
10 723 87. Ouimet M, Bedard P-O, Gelineau F. Are the h-index and some of its alternatives  
11 724 discriminatory of epistemological beliefs and methodological preferences of faculty  
12 725 members? The case of social scientists in Quebec. *Scientometrics.* 2011;88(1):91-106.  
13  
14 726 88. Kshetry VR, Benzel EC. Research productivity and fellowship training in  
15 727 neurosurgery. *World Neurosurg.* 2013;80(6):787-8.  
16  
17 728 89. Biswal AK. An absolute index (Ab-index) to measure a researcher's useful  
18 729 contributions and productivity. *PLOS One.* 2013;8(12): doi:  
19 730 10.1371/journal.pone.0084334.  
20  
21 731 90. Tschudy MM, Rowe TL, Dover GJ, Cheng TL. Pediatric academic productivity:  
22 732 pediatric benchmarks for the h- and g-indices. *J Pediatr.* 2016;169:272-6.  
23  
24 733 91. Azer SA, Azer S. Bibliometric analysis of the top-cited gastroenterology and  
25 734 hepatology articles. *BMJ Open.* 2016;6(2): doi: 10.1136/bmjopen-2015-009889.  
26  
27 735 92. Joshi MA. Bibliometric indicators for evaluating the quality of scientific publications.  
28 736 *J Contemp Dent Pract.* 2014;15(2):258-62.  
29  
30 737 93. Danielson J, McElroy S. Quantifying published scholarly works of experiential  
31 738 education directors. *Am J Pharm Edu.* 2013;77(8):167.  
32  
33 739 94. Ion D, Andronic O, Bolocan A, Al-Moushaly R, Paduraru DN. Tendencies on  
34 740 traditional metrics. *Chirurgia (Bucur).* 2017;112(2):117-23.  
35  
36 741 95. Suiter AM, Moulaison HL. Supporting scholars: an analysis of academic library  
37 742 websites' documentation on metrics and impact. *J Acad Librariansh.* 2015;41(6):814-  
38 743 20.  
39  
40 744 96. Butler JS, Kaye ID, Sebastian AS, et al. The evolution of current research impact  
41 745 metrics from bibliometrics to altmetrics? *Clin Spine Surg.* 2017;30(5):226-8.  
42  
43 746 97. Krapivin M, Marchese M, Casati F. Exploring and understanding scientific metrics in  
44 747 citation networks. In: Zhou J, editor. *Complex Sciences, Pt 2. Lecture Notes of the*  
45 748 *Institute for Computer Sciences Social Informatics and Telecommunications*  
46 749 *Engineering.* 52009. p. 1550-63.

- 1  
2  
3 750 98. Carpenter TA. Comparing digital apples to digital apples: background on niso's effort  
4 751 to build an infrastructure for new forms of scholarly assessment. *Inf Serv Use*.  
5 752 2014;34(1-2):103-6.  
6  
7 753 99. Gasparyan AY, Nurmashev B, Yessirkepov M, et al. The journal impact factor:  
8 754 moving toward an alternative and combined scientometric approach. *J Korean Med*  
9 755 *Sci* 2017;32(2):173-9.  
10  
11 756 100. Moed HF, Halevi G. Multidimensional assessment of scholarly research impact. *J*  
12 757 *Assoc Inf Sci Technol*. 2015;66(10):1988-2002.  
13  
14 758 101. Chuang K-Y, Olaiya MT, Ho Y-S. Bibliometric analysis of the Polish Journal of  
15 759 Environmental Studies (2000-11). *Pol J Environ Stud*. 2012;21(5):1175-83.  
16  
17 760 102. van Noorden R. A profusion of measures. *Nature*. 2010;465(7300):864-6.  
18  
19 761 103. van Noorden R. Love thy lab neighbour. *Nature*. 2010;468(7327):1011-  
20  
21 762 104. Dinsmore A, Allen L, Dolby K. Alternative perspectives on impact: the potential of  
22 763 ALMs and altmetrics to inform funders about research impact. *PLOS Biol*.  
23 764 2014;12(11):e1002003.  
24  
25 765 105. Cress PE. Using altmetrics and social media to supplement impact factor: maximizing  
26 766 your article's academic and societal impact. *Aesthet Surg J*. 2014;34(7):1123-6.  
27  
28 767 106. Moreira JAG, Zeng XHT, Amaral LAN. The distribution of the asymptotic number of  
29 768 citations to sets of publications by a researcher or from an academic department are  
30 769 consistent with a discrete lognormal model. *PLOS One*. 2015;10(11): doi:  
31 770 10.1371/journal.pone.0143108.  
32  
33 771 107. Waljee JF. Discussion: are quantitative measures of academic productivity correlated  
34 772 with academic rank in plastic surgery? A national study. *Plast Reconstr Surg*.  
35 773 2015;136(3):622-3.  
36  
37 774 108. Fazel S, Wolf A. What is the impact of a research publication? *Evid Based Ment*  
38 775 *Health*. 2017;20(2):33-4.  
39  
40 776 109. Eysenbach G. Can tweets predict citations? Metrics of social impact based on Twitter  
41 777 and correlation with traditional metrics of scientific impact. *J Med Internet Res*.  
42 778 2011;13(4): doi: 10.2196/jmir.012.  
43  
44 779 110. Hoffmann CP, Lutz C, Meckel M. Impact factor 2.0: applying social network analysis  
45 780 to scientific impact assessment. In: Sprague RH, editor. 2014 47th Hawaii  
46 781 International Conference on System Sciences. Proceedings of the Annual Hawaii  
47 782 International Conference on System Sciences 2014. p. 1576-85.  
48  
49  
50  
51  
52  
53  
54  
55  
56  
57  
58  
59  
60

- 1  
2  
3 783 111. Maggio LA, Meyer HS, Artino AR. Beyond citation rates: a real-time impact analysis  
4 784 of health professions education research using altmetrics. *Acad Med*.  
5 785 2017;92(10):1449-55.  
6  
7 786 112. Raj A, Carr PL, Kaplan SE, et al. Longitudinal analysis of gender differences in  
8 787 academic productivity among medical faculty across 24 medical schools in the United  
9 788 States. *Acad Med*. 2016;91(8):1074-9.  
10  
11 789 113. Markel TA, Valsangkar NP, Bell TM, et al. Endangered academia: preserving the  
12 790 pediatric surgeon scientist. *J Pediatr Surg*. 2017;52(7):1079-83.  
13  
14 791 114. Mirnezami SR, Beaudry C, Lariviere V. What determines researchers' scientific  
15 792 impact? A case study of Quebec researchers. *Sci Public Policy*. 2016;43(2):262-74.  
16  
17 793 115. Napolitano LM. Scholarly activity requirements for critical care fellowship program  
18 794 directors: what should it be? How should we measure it? *Crit Care Med*.  
19 795 2016;44(12):2293-6.  
20  
21 796 116. Bai X, Xia F, Lee I, Zhang J, Ning Z. Identifying anomalous citations for objective  
22 797 evaluation of scholarly article impact. *PLOS One*. 2016;11(9): doi:  
23 798 10.1371/journal.pone.0162364.  
24  
25 799 117. Gao C, Wang Z, Li X, Zhang Z, Zeng W. PR-Index: using the h-Index and PageRank  
26 800 for determining true impact. *PLOS One*. 2016;11(9): doi:  
27 801 10.1371/journal.pone.0161755.  
28  
29 802 118. Assimakis N, Adam M. A new author's productivity index: p-index. *Scientometrics*.  
30 803 2010;85(2):415-27.  
31  
32 804 119. Petersen AM, Succi S. The Z-index: a geometric representation of productivity and  
33 805 impact which accounts for information in the entire rank-citation profile. *J Informetr*.  
34 806 2013;7(4):823-32.  
35  
36 807 120. Claro J, Costa CAV. A made-to-measure indicator for cross-disciplinary bibliometric  
37 808 ranking of researchers performance. *Scientometrics*. 2011;86(1):113-23.  
38  
39 809 121. Sahoo BK, Singh R, Mishra B, Sankaran K. Research productivity in management  
40 810 schools of India during 1968-2015: a directional benefit-of-doubt model analysis.  
41 811 *Omega Int J Manage S*. 2017;66:118-39.  
42  
43 812 122. Aragon AM. A measure for the impact of research. *Sci Rep*. 2013;3: doi:  
44 813 10.1038/srep01649.  
45  
46 814 123. Shibayama S, Baba Y. Impact-oriented science policies and scientific publication  
47 815 practices: the case of life sciences in Japan. *Res Policy*. 2015;44(4):936-50.  
48  
49  
50  
51  
52  
53  
54  
55  
56  
57  
58  
59  
60



- 1  
2  
3 816 124. Tijdink JK, Schipper K, Bouter LM, et al. How do scientists perceive the current  
4 817 publication culture? A qualitative focus group interview study among Dutch  
5 818 biomedical researchers. *BMJ Open*. 2016;6(2): doi: 10.1136/bmjopen-2015-008681.  
6  
7 819 125. Crespo JA, Li Y, Ruiz-Castillo J. The measurement of the effect on citation inequality  
8 820 of differences in citation practices across scientific fields. *PLOS One*. 2013;8(3): doi:  
9 821 10.1371/journal.pone.0058727.  
10  
11 822 126. da Silva JAT. Does China need to rethink its metrics- and citation-based research  
12 823 rewards policies? *Scientometrics*. 2017;112(3):1853-7.  
13  
14 824 127. Devos P. Research and bibliometrics: a long history. *Clin Res Hepatol Gastroenterol*.  
15 825 2011;35(5):336-7.  
16  
17 826 128. Slyder JB, Stein BR, Sams BS, et al. Citation pattern and lifespan: a comparison of  
18 827 discipline, institution, and individual. *Scientometrics*. 2011;89(3):955-66.  
19  
20 828 129. Zhou Y-B, Lu L, Li M. Quantifying the influence of scientists and their publications:  
21 829 distinguishing between prestige and popularity. *New J Phys*. 2012;14: doi:  
22 830 10.1088/367-2630/14/3/033033.  
23  
24 831 130. Sorensen AA, Weedon D. Productivity and impact of the top 100 cited Parkinson's  
25 832 disease investigators since 1985. *J Parkinsons Dis*. 2011;1(1):3-13.  
26  
27 833 131. Jeang K-T. H-index, mentoring-index, highly-cited and highly-accessed: how to  
28 834 evaluate scientists? *Retrovirology*. 2008;5(106).  
29  
30 835 132. Franceschini F, Maisano D. Publication and patent analysis of European researchers  
31 836 in the field of production technology and manufacturing systems. *Scientometrics*.  
32 837 2012;93(1):89-100.  
33  
34 838 133. Sibbald SL, MacGregor JCD, Surmacz M, Wathen CN. Into the gray: a modified  
35 839 approach to citation analysis to better understand research impact. *J Med Libr Assoc*.  
36 840 2015;103(1):49-54.  
37  
38 841 134. Sutherland WJ, Goulson D, Potts SG, Dicks LV. Quantifying the impact and  
39 842 relevance of scientific research. *PLOS One*. 2011;6(11):e27537.  
40  
41 843 135. Nature Editorial Team. Announcement: Nature journals support the San Francisco  
42 844 Declaration on Research Assessment. *Nature*. 2017;544(7651):394.  
43  
44 845 136. Pugh EN, Jr., Gordon SE. Embracing the principles of the San Francisco Declaration  
45 846 of Research Assessment: Robert Balaban's editorial. *J Gen Physiol*. 2013;142(3):175.  
46  
47 847 137. Zhang L, Rousseau R, Sivertsen G. Science deserves to be judged by its contents, not  
48 848 by its wrapping: revisiting Seglen's work on journal impact and research evaluation.  
49 849 *PLOS One*. 2017;12(3): doi: 10.1371/journal.pone.0174205.  
50  
51  
52  
53  
54  
55  
56  
57  
58  
59  
60

- 1  
2  
3 850 138. San Francisco Declaration on Research Assessment (DORA). DORA—ASCB.  
4 851 Retrieved from: <http://www.ascb.org/dora/>  
5  
6 852 139. Cabezas-Clavijo A, Delgado-Lopez-Cozar E. Google Scholar and the h-index in  
7 853 biomedicine: the popularization of bibliometric assessment. *Med Intensiva*.  
8 854 2013;37(5):343-54.  
9  
10 855 140. Iyengar R, Wang Y, Chow J, Charney DS. An integrated approach to evaluate faculty  
11 856 members' research performance. *Acad Med*. 2009;84(11):1610-6.  
12  
13 857 141. Jacso P. Eigenfactor and article influence scores in the journal citation reports. *Online*  
14 858 *Inform Rev*. 2010;34(2):339-48.  
15  
16 859  
17  
18  
19  
20  
21  
22  
23  
24  
25  
26  
27  
28  
29  
30  
31  
32  
33  
34  
35  
36  
37  
38  
39  
40  
41  
42  
43  
44  
45  
46  
47  
48  
49  
50  
51  
52  
53  
54  
55  
56  
57  
58  
59  
60



1  
2  
3  
4  
5  
6  
7  
8  
9  
10  
11  
12  
13  
14  
15  
16  
17  
18  
19  
20  
21  
22  
23  
24  
25  
26  
27  
28  
29  
30  
31  
32  
33  
34  
35  
36  
37  
38  
39  
40  
41  
42  
43  
44  
45  
46  
47  
48  
49  
50  
51  
52  
53  
54  
55  
56  
57  
58  
59  
60

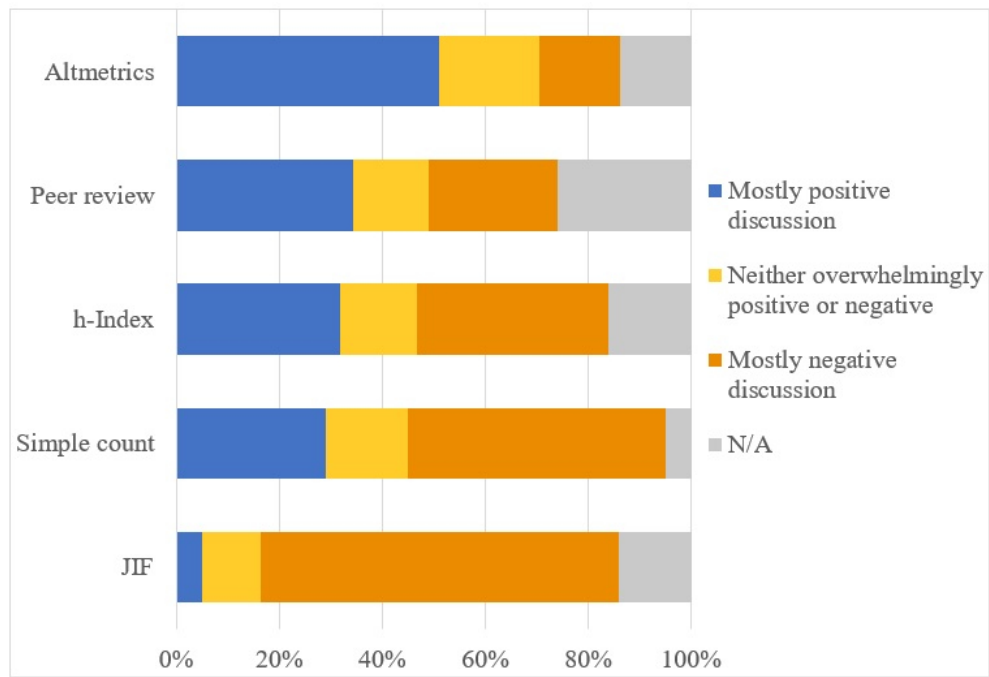

203x139mm (96 x 96 DPI)

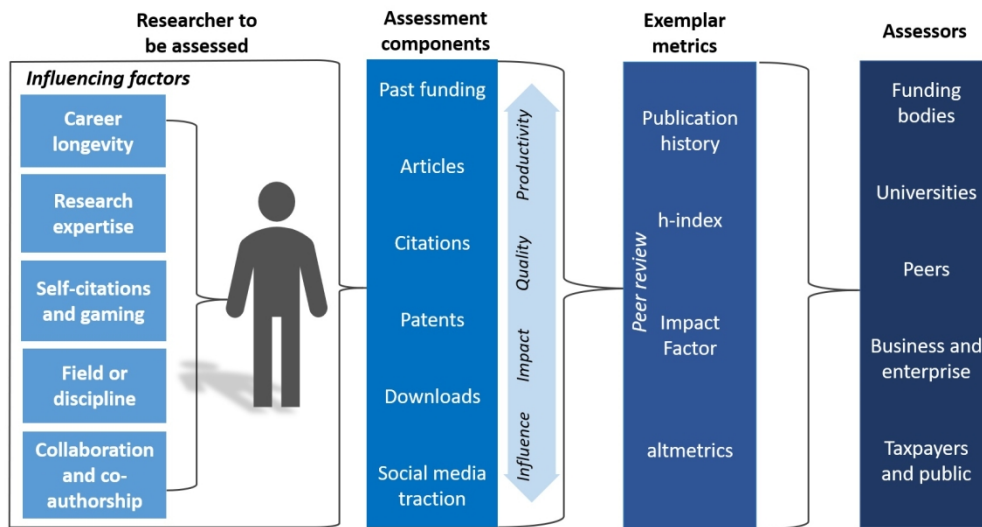

466x248mm (96 x 96 DPI)

**Appendix 1: Summary table of included articles and the metrics or models they discuss**

| Publication Details |      |                                             |                     | Metric or Model Assessing an Individual's Research Achievement |               |         |     |       |             |     |
|---------------------|------|---------------------------------------------|---------------------|----------------------------------------------------------------|---------------|---------|-----|-------|-------------|-----|
| First author        | Year | Journal name                                | Format <sup>^</sup> | Peer-review                                                    | Simple Counts | h-index | JIF | Other | Alt-metrics | New |
| Abramo              | 2016 | Scientometrics                              | ED                  |                                                                |               |         |     | Y     |             |     |
| Agarwal             | 2016 | Asian Journal of Andrology                  | ED                  |                                                                | Y             | Y       | Y   | Y     | Y           |     |
| Ahmad               | 2013 | Anesthesia and Analgesia                    | EM                  |                                                                | Y             |         |     |       |             |     |
| Aixela              | 2015 | Perspectives: Studies in Translatology      | ED                  | Y                                                              |               | Y       | Y   | Y     |             |     |
| Akl                 | 2012 | Canadian Medical Association Journal        | EM                  | Y                                                              |               |         |     |       |             |     |
| Albion              | 2012 | Australian Educational Researcher           | EM                  |                                                                |               | Y       | Y   | Y     |             |     |
| Alguliyev           | 2016 | Journal of Scientometric Research           | EM                  |                                                                |               |         | Y   | Y     |             |     |
| Allen               | 2010 | ScienceAsia                                 | ED                  |                                                                |               | Y       | Y   |       |             |     |
| Anderson            | 2008 | Scientometrics                              | ED                  |                                                                |               | Y       |     |       |             | Y   |
| Anderson            | 2017 | Applied Economics                           | EM                  | Y                                                              |               | Y       | Y   |       |             |     |
| Anfossi             | 2015 | International Journal of Dermatology        | EM                  |                                                                |               |         | Y   |       |             |     |
| Antunes             | 2015 | Revista do Colegio Brasileiro de Cirurgioes | EM                  | Y                                                              |               | Y       |     |       |             |     |
| Aoun                | 2013 | World Neurosurgery                          | RE                  | Y                                                              |               | Y       | Y   |       |             |     |
| Aragon              | 2013 | Nature Scientific Reports                   | EM                  |                                                                |               |         |     |       |             | Y   |
| Armado              | 2017 | Transinformação                             | EM                  |                                                                |               | Y       |     | Y     |             |     |
| Assimakis           | 2010 | Scientometrics                              | EM                  |                                                                |               |         |     |       |             | Y   |
| Azer                | 2016 | Education Forum                             |                     |                                                                |               | Y       | Y   | Y     |             |     |
| Babineau            | 2014 | The Western Journal of Emergency Medicine   | EM                  |                                                                |               | Y       |     |       |             |     |

|    |                   |      |                                                   |    |   |   |   |   |   |
|----|-------------------|------|---------------------------------------------------|----|---|---|---|---|---|
| 1  |                   |      |                                                   |    |   |   |   |   |   |
| 2  |                   |      |                                                   |    |   |   |   |   |   |
| 3  |                   |      |                                                   |    |   |   |   |   |   |
| 4  |                   |      |                                                   |    |   |   |   |   |   |
| 5  | Baccini           | 2014 | Scientometrics                                    | EM |   |   | Y | Y | Y |
| 6  | Badar             | 2016 | Aslib Journal of Information Management           | EM | Y |   |   | Y |   |
| 7  | Bai               | 2016 | PLOS One                                          | EM |   | Y | Y | Y | Y |
| 8  | Bala              | 2013 | Journal of Clinical Epidemiology                  | EM |   |   |   | Y |   |
| 9  | Balaban           | 2013 | Journal of General Physiology                     | ED | Y |   |   |   |   |
| 10 | Balandin          | 2009 | Augmentative and Alternative Communication        | ED |   |   | Y | Y |   |
| 11 | Barczynski        | 2009 | Journal of Human Kinetics                         | ED |   |   |   | Y | Y |
| 12 | Bastian           | 2017 | Journal of Bone and Joint Surgery-American Volume | EM |   |   | Y |   |   |
| 13 | Baum              | 2011 | SAGE                                              | EM | Y |   |   | Y |   |
| 14 | Beck              | 2017 | Research Evaluation                               | EM | Y |   |   |   |   |
| 15 | Beirlant          | 2010 | Scandinavian Journal of Statistics                | EM |   |   | Y |   |   |
| 16 | Belikov           | 2015 | f1000 Research                                    | EM |   |   | Y |   | Y |
| 17 | Bellini           | 2012 | The Lancet                                        | ED |   | Y | Y | Y |   |
| 18 | Belter            | 2015 | Journal of The Medical Library Association        | ED | Y |   | Y |   |   |
| 19 | Benchimol-Barbosa | 2011 | Arquivos Brasileiros de Cardiologia               | ED |   |   |   | Y |   |
| 20 | Benway            | 2009 | Urology                                           | ED | Y | Y | Y |   |   |
| 21 | Bertuzzi          | 2013 | Molecular Biology of the Cell                     | ED |   |   |   | Y |   |
| 22 | Bharathi          | 2013 | PLOS One                                          | ED |   |   | Y |   |   |
| 23 | Bini              | 2008 | Electronic Transactions on Numerical Analysis     | EM |   |   |   |   | Y |
| 24 | Birks             | 2014 | Health Services Research & Policy                 | EM | Y |   | Y |   |   |
| 25 | Biswal            | 2013 | PLOS One                                          | ED |   |   | Y |   | Y |
| 26 | Bloch             | 2016 | Research Evaluation                               | EM |   |   |   |   | Y |
| 27 |                   |      |                                                   |    |   |   |   |   |   |
| 28 |                   |      |                                                   |    |   |   |   |   |   |
| 29 |                   |      |                                                   |    |   |   |   |   |   |
| 30 |                   |      |                                                   |    |   |   |   |   |   |
| 31 |                   |      |                                                   |    |   |   |   |   |   |
| 32 |                   |      |                                                   |    |   |   |   |   |   |
| 33 |                   |      |                                                   |    |   |   |   |   |   |
| 34 |                   |      |                                                   |    |   |   |   |   |   |
| 35 |                   |      |                                                   |    |   |   |   |   |   |
| 36 |                   |      |                                                   |    |   |   |   |   |   |
| 37 |                   |      |                                                   |    |   |   |   |   |   |
| 38 |                   |      |                                                   |    |   |   |   |   |   |
| 39 |                   |      |                                                   |    |   |   |   |   |   |
| 40 |                   |      |                                                   |    |   |   |   |   |   |
| 41 |                   |      |                                                   |    |   |   |   |   |   |
| 42 |                   |      |                                                   |    |   |   |   |   |   |
| 43 |                   |      |                                                   |    |   |   |   |   |   |
| 44 |                   |      |                                                   |    |   |   |   |   |   |
| 45 |                   |      |                                                   |    |   |   |   |   |   |
| 46 |                   |      |                                                   |    |   |   |   |   |   |
| 47 |                   |      |                                                   |    |   |   |   |   |   |

1  
2  
3  
4  
5  
6  
7  
8  
9  
10  
11  
12  
13  
14  
15  
16  
17  
18  
19  
20  
21  
22  
23  
24  
25  
26  
27  
28  
29  
30  
31  
32  
33  
34  
35  
36  
37  
38  
39  
40  
41  
42  
43  
44  
45  
46  
47

|                 |      |                                          |    |   |   |   |   |   |   |   |
|-----------------|------|------------------------------------------|----|---|---|---|---|---|---|---|
| Bloching        | 2013 | South African Journal of Science         | EM | Y |   |   |   |   |   | Y |
| Bollen          | 2016 | Scientometrics                           | ED | Y |   |   |   |   |   | Y |
| Bolli           | 2014 | Circulation Research                     | ED |   |   |   |   |   |   |   |
| Bornmann        | 2009 | EMBO Reports                             | ED |   |   |   | Y | Y |   |   |
| Bornmann        | 2015 | Journal of Informetrics                  | EM | Y | Y | Y | Y | Y |   |   |
| Bornmann        | 2016 | EMBO Reports                             | ED |   |   | Y | Y | Y |   |   |
| Bornmann        | 2014 | Scientometrics                           | EM |   |   | Y | Y |   |   |   |
| Bornmann        | 2008 | Research Evaluation                      | EM | Y | Y | Y | Y | Y | Y |   |
| Bornmann        | 2017 | Journal of Informetrics                  | EM |   |   | Y | Y | Y | Y |   |
| Bornmann        | 2017 | Journal of Korean Medical Science        | ED |   |   |   |   | Y | Y |   |
| Bould           | 2011 | British Journal of Anaesthesia           | EM |   |   |   | Y |   |   |   |
| Bradshaw        | 2016 | PLOS One                                 | EM |   |   | Y | Y | Y | Y |   |
| Brown           | 2011 | American Journal of Occupational Therapy | ED |   |   |   | Y | Y | Y |   |
| Buela-Casal     | 2012 | Scientometrics                           | EM |   |   |   |   | Y |   |   |
| Buela-Casal     | 2010 | Revista de Psicodidáctica                | ED |   |   | Y | Y | Y | Y | Y |
| Butler          | 2017 | Clinical Spine Surgery                   | ED |   |   |   |   |   |   | Y |
| Cabazas Clavijo | 2013 | Medicina Intensiva (English edition)     | RE |   |   | Y | Y | Y |   |   |
| Cagan           | 2013 | Disease Models & Mechanisms              | ED |   |   |   |   | Y |   |   |
| Callaway        | 2016 | Nature                                   | ED |   |   |   |   | Y |   |   |
| Calver          | 2013 | Grumpy Scientists                        | ED |   |   | Y | Y | Y | Y |   |
| Calver          | 2015 | Australian Universities Review           | ED |   |   |   |   |   | Y |   |
| Caminiti        | 2015 | BMC Health Services Research             | RE |   |   |   |   |   |   | Y |

|    |                     |      |                                                                        |    |   |   |   |   |   |
|----|---------------------|------|------------------------------------------------------------------------|----|---|---|---|---|---|
| 1  |                     |      |                                                                        |    |   |   |   |   |   |
| 2  |                     |      |                                                                        |    |   |   |   |   |   |
| 3  |                     |      |                                                                        |    |   |   |   |   |   |
| 4  |                     |      |                                                                        |    |   |   |   |   |   |
| 5  | Cantin              | 2015 | International Journal of Morphology                                    | EM |   |   | Y |   |   |
| 6  | Carpenter           | 2014 | Academic Emergency Medicine                                            | ED |   |   | Y | Y | Y |
| 7  | Carpenter           | 2014 | Information Service and Use                                            | ED |   |   |   | Y | Y |
| 8  | Carpenter           | 2014 | Information Service and Use                                            | ED |   |   |   | Y | Y |
| 9  | Castelnuovo         | 2010 | Clinical Practice & Epidemiology in Mental Health                      | RE |   |   | Y | Y |   |
| 10 | Castelnuovo         | 2010 | Clinical Practice & Epidemiology in Mental Health                      | RE |   |   | Y | Y | Y |
| 11 | Castillo            | 2010 | American Journal of Neuroradiology                                     | ED |   |   | Y |   | Y |
| 12 | Castillo            | 2010 | American Journal of Neuroradiology                                     | ED |   |   | Y |   | Y |
| 13 | Chiari              | 2016 | Nurse Education Today                                                  | EM | Y |   |   |   |   |
| 14 | Choi                | 2014 | Journal of Radiation Oncology                                          | EM | Y |   | Y |   | Y |
| 15 | Choi                | 2014 | Journal of Radiation Oncology                                          | EM | Y |   | Y |   | Y |
| 16 | Choi                | 2009 | International Journal of Radiation Oncology, Biology, Physics          | EM |   | Y | Y |   |   |
| 17 | Choi                | 2009 | International Journal of Radiation Oncology, Biology, Physics          | EM |   | Y | Y |   |   |
| 18 | Chopra              | 2016 | Aesthetic Surgery Journal                                              | EM |   |   | Y |   |   |
| 19 | Chopra              | 2016 | Aesthetic Surgery Journal                                              | EM |   |   | Y |   |   |
| 20 | Choudhri            | 2015 | Radiographics                                                          | ED |   | Y | Y | Y |   |
| 21 | Chowdhury           | 2015 | PLOS One                                                               | EM | Y |   | Y |   |   |
| 22 | Chowdhury           | 2015 | PLOS One                                                               | EM | Y |   | Y |   |   |
| 23 | Christopher         | 2015 | Journal of Veterinary Cardiology                                       | ED |   |   |   | Y |   |
| 24 | Chung               | 2012 | Scientometrics                                                         | EM |   |   |   |   | Y |
| 25 | Chung               | 2012 | Scientometrics                                                         | EM |   |   |   |   | Y |
| 26 | Ciriminna           | 2013 | Chemistry Central Journal                                              | ED |   | Y | Y | Y | Y |
| 27 | Ciriminna           | 2013 | Chemistry Central Journal                                              | ED |   | Y | Y | Y | Y |
| 28 | Claro               | 2011 | Scientometrics                                                         | EM |   |   |   |   |   |
| 29 | Claro               | 2011 | Scientometrics                                                         | EM |   |   |   |   |   |
| 30 | Cleary              | 2010 | International Journal of Mental Health Nursing                         | ED |   |   | Y |   |   |
| 31 | Cleary              | 2010 | International Journal of Mental Health Nursing                         | ED |   |   | Y |   |   |
| 32 | Cone                | 2013 | Academic Emergency Medicine                                            | ED |   |   | Y |   |   |
| 33 | Cone                | 2013 | Academic Emergency Medicine                                            | ED |   |   | Y |   |   |
| 34 | Cone                | 2012 | Academic Emergency Medicine                                            | ED |   |   |   | Y |   |
| 35 | Cone                | 2012 | Academic Emergency Medicine                                            | ED |   |   |   | Y |   |
| 36 | Cordero-Villafafila | 2015 | Revista de Psiquiatría y Salud Mental (English Edition)                | ED |   |   | Y | Y | Y |
| 37 | Cordero-Villafafila | 2015 | Revista de Psiquiatría y Salud Mental (English Edition)                | ED |   |   | Y | Y | Y |
| 38 | Costas              | 2011 | Scientometrics                                                         | EM |   | Y |   |   | Y |
| 39 | Costas              | 2011 | Scientometrics                                                         | EM |   | Y |   |   | Y |
| 40 | Costas              | 2009 | Journal of the American Society for Information Science and Technology | EM |   | Y |   | Y |   |
| 41 | Costas              | 2009 | Journal of the American Society for Information Science and Technology | EM |   | Y |   | Y |   |

1  
2  
3  
4  
5  
6  
7  
8  
9  
10  
11  
12  
13  
14  
15  
16  
17  
18  
19  
20  
21  
22  
23  
24  
25  
26  
27  
28  
29  
30  
31  
32  
33  
34  
35  
36  
37  
38  
39  
40  
41  
42  
43  
44  
45  
46  
47

|                                |      |                                                                        |    |   |   |   |   |   |   |
|--------------------------------|------|------------------------------------------------------------------------|----|---|---|---|---|---|---|
| Crespo                         | 2013 | PLOS One                                                               | EM |   | Y | Y |   |   | Y |
| Cress                          | 2014 | Aesthetic Surgery Journal                                              | ED |   |   |   | Y |   | Y |
| Crotty                         |      | European Heart Journal                                                 | ED |   |   | Y |   |   |   |
| Culley                         | 2014 | Anesthesia & Analgesia                                                 | EM |   | Y | Y |   | Y |   |
| Cynical Geographers Collective | 2011 | Antipode                                                               | ED |   | Y |   | Y |   |   |
| Czarnecki                      | 2013 | Bulletin of the Polish Academy of Sciences                             | EM |   |   |   | Y |   |   |
| da Silva                       | 2017 | Scientometrics                                                         | ED |   |   |   | Y | Y | Y |
| Danell                         | 2011 | Journal of the American Society for Information Science and Technology | EM |   | Y |   |   |   |   |
| Danielson                      | 2013 | American Journal of Pharmaceutical Education                           | EM |   | Y | Y |   | Y |   |
| de Granda-Orive                | 2014 | Archivos de Bronconeumología                                           | ED |   | Y |   |   | Y |   |
| De Gregori                     | 2016 | Journal of Pain Research                                               | EM |   |   |   |   |   | Y |
| De la Flor-Martínez M          | 2017 | Medicina Oral Patología Oral Y Cirugía Bucal                           | EM | Y |   | Y |   |   |   |
| De Marchi                      | 2016 | Scientometrics                                                         | EM |   |   |   | Y |   |   |
| De Witte                       | 2010 | Scientometrics                                                         | EM | Y |   |   |   |   | Y |
| Delgadillo                     | 2016 | Family & Consumer Sciences research journal                            | RE |   |   |   | Y |   | Y |
| DeLuca                         | 2013 | Academic Emergency Medicine                                            | EM | Y |   | Y |   |   |   |
| Devos                          | 2011 | Clinics and Research in Hepatology and Gastroenterology                | ED |   |   | Y |   |   |   |
| Diamandis                      | 2017 | BMC Medicine                                                           | ED |   |   |   | Y |   |   |
| DiBartola                      | 2017 | Journal of Veterinary Internal Medicine                                | ED |   |   |   | Y | Y | Y |
| Diem                           | 2013 | Research in Higher Education                                           | EM |   |   |   | Y |   |   |
| Ding                           | 2011 | Information Processing and Management                                  | EM |   | Y | Y | Y | Y | Y |

|    |             |      |                                                             |    |   |   |   |   |   |
|----|-------------|------|-------------------------------------------------------------|----|---|---|---|---|---|
| 1  |             |      |                                                             |    |   |   |   |   |   |
| 2  |             |      |                                                             |    |   |   |   |   |   |
| 3  |             |      |                                                             |    |   |   |   |   |   |
| 4  |             |      |                                                             |    |   |   |   |   |   |
| 5  |             |      | Journal of the American Society for Information Science and |    |   |   |   |   |   |
| 6  | Ding        | 2011 | Technology                                                  | EM |   |   | Y | Y | Y |
| 7  | Diniz-Filho | 2016 | Journal of Informetrics                                     | EM | Y | Y |   | Y |   |
| 8  | Dinsmore    | 2014 | PLOS Biology                                                | ED |   |   |   |   | Y |
| 9  | Dodson      | 2012 | Biochemical and Biophysical Research Communications         | EM | Y |   | Y | Y | Y |
| 10 | Donato      | 2014 | Revista Portuguesa De Pneumologia                           | ED |   |   |   | Y |   |
| 11 | Doyle       | 2015 | Molecular Psychiatry                                        | EM | Y |   |   |   |   |
| 12 | Duffy       | 2011 | Scientometrics                                              | EM |   | Y | Y |   | Y |
| 13 | Duffy       | 2008 | Journal of Counseling Psychology                            | EM |   | Y | Y |   | Y |
| 14 | Durieux     | 2010 | Radiology                                                   | RE |   |   | Y | Y | Y |
| 15 | Ebadi       | 2016 | Scientometrics                                              | EM |   |   |   | Y | Y |
| 16 | Eblen       | 2016 | PLOS One                                                    | EM | Y |   |   |   |   |
| 17 | Efron       | 2011 | Clinical and Experimental Optometry                         | EM |   | Y | Y |   | Y |
| 18 | Ekpo        | 2016 | Journal of Medical Imaging and Radiation Sciences           | EM |   |   | Y | Y | Y |
| 19 | El Emam     | 2012 | Journal of Medical Internet Research                        | EM |   | Y | Y | Y |   |
| 20 | Ellson      | 2009 | Journal of Business Research                                | ED |   |   |   |   |   |
| 21 | Eloy        | 2014 | Otolaryngology–Head and Neck Surgery                        | EM | Y |   | Y | Y | Y |
| 22 | Eloy        | 2013 | Laryngoscope                                                | EM |   |   | Y |   |   |
| 23 | Esposito    | 2010 | European Journal of Oral Implantology.                      | ED |   |   | Y |   |   |
| 24 | Eyre-Walker | 2013 | PLOS Biology                                                | EM | Y | Y |   | Y |   |
| 25 | Eysenbach   | 2011 | Journal of Medical Internet Research                        | EM |   | Y | Y | Y | Y |
| 26 | Fabry       | 2017 | GMS Journal for Medical Education                           | ED | Y |   |   | Y | Y |
| 27 |             |      |                                                             |    |   |   |   |   |   |
| 28 |             |      |                                                             |    |   |   |   |   |   |
| 29 |             |      |                                                             |    |   |   |   |   |   |
| 30 |             |      |                                                             |    |   |   |   |   |   |
| 31 |             |      |                                                             |    |   |   |   |   |   |
| 32 |             |      |                                                             |    |   |   |   |   |   |
| 33 |             |      |                                                             |    |   |   |   |   |   |
| 34 |             |      |                                                             |    |   |   |   |   |   |
| 35 |             |      |                                                             |    |   |   |   |   |   |
| 36 |             |      |                                                             |    |   |   |   |   |   |
| 37 |             |      |                                                             |    |   |   |   |   |   |
| 38 |             |      |                                                             |    |   |   |   |   |   |
| 39 |             |      |                                                             |    |   |   |   |   |   |
| 40 |             |      |                                                             |    |   |   |   |   |   |
| 41 |             |      |                                                             |    |   |   |   |   |   |
| 42 |             |      |                                                             |    |   |   |   |   |   |
| 43 |             |      |                                                             |    |   |   |   |   |   |
| 44 |             |      |                                                             |    |   |   |   |   |   |
| 45 |             |      |                                                             |    |   |   |   |   |   |
| 46 |             |      |                                                             |    |   |   |   |   |   |
| 47 |             |      |                                                             |    |   |   |   |   |   |



1  
2  
3  
4  
5  
6  
7  
8  
9  
10  
11  
12  
13  
14  
15  
16  
17  
18  
19  
20  
21  
22  
23  
24  
25  
26  
27  
28  
29  
30  
31  
32  
33  
34  
35  
36  
37  
38  
39  
40  
41  
42  
43  
44  
45  
46  
47

|               |      |                                                                          |    |   |   |   |   |   |   |
|---------------|------|--------------------------------------------------------------------------|----|---|---|---|---|---|---|
| Fang          | 2016 | eLIFE                                                                    | EM | Y |   |   |   |   |   |
| Fazel         | 2017 | Evidence-based Mental Health                                             | EM | Y |   |   | Y | Y |   |
| Fedderke      | 2015 | Research Policy                                                          | EM |   | Y | Y |   |   |   |
| Feethman      | 2015 | Veterinary Record                                                        | ED |   |   |   | Y |   |   |
| Ferrer-Sapena | 2016 | Research Evaluation                                                      | ED |   | Y |   | Y | Y | Y |
| Filler        | 2014 | Academic Medicine                                                        | EM |   |   |   | Y |   |   |
| Finch         | 2010 | Bioessays                                                                | ED |   |   | Y | Y | Y |   |
| Flaatten      | 2016 | Acta Anaesthesiologica Scandinavica                                      | ED |   |   | Y | Y |   |   |
| Franceschet   | 2010 | Journal of Informetrics                                                  | EM |   |   |   | Y | Y |   |
| Franceschini  | 2012 | Scientometrics                                                           | EM |   |   |   | Y |   | Y |
| Franceschini  | 2012 | Scientometrics                                                           | EM |   |   | Y | Y | Y | Y |
| Franceschini  | 2012 | Scientometrics                                                           | EM |   | Y | Y | Y |   |   |
| Frittelli     | 2016 | Journal of the Association for Information Science and Technology        | EM |   |   | Y | Y |   | Y |
| Frixione      | 2016 | PLOS One                                                                 | EM | Y |   |   |   |   | Y |
| Fujita        | 2017 | IEEE 41st Annual Computer Software and Applications Conference (COMPSAC) | EM | Y | Y |   |   |   |   |
| Gambadauro    | 2007 | European Journal of Obstetrics & Gynecology and Reproductive Biology     | ED |   |   |   | Y |   |   |
| Gao           | 2016 | PLOS One                                                                 | ED |   |   |   | Y |   | Y |
| Garcia-Perez  | 2015 | Scientometrics                                                           | EM |   | Y |   |   | Y |   |
| Garcia-Perez  | 2009 | Spanish Journal of Psychology                                            | EM |   | Y | Y |   |   |   |
| Garner        | 2017 | Journal of Neurointerventional Surgery                                   | RE |   | Y | Y |   |   |   |

|    |                    |      |                                                       |    |   |   |   |   |   |
|----|--------------------|------|-------------------------------------------------------|----|---|---|---|---|---|
| 1  |                    |      |                                                       |    |   |   |   |   |   |
| 2  |                    |      |                                                       |    |   |   |   |   |   |
| 3  |                    |      |                                                       |    |   |   |   |   |   |
| 4  |                    |      |                                                       |    |   |   |   |   |   |
| 5  | Gasparyan          | 2017 | Journal of Korean Medical Science                     | ED |   |   | Y | Y | Y |
| 6  | Gast               | 2014 | Plastic and Reconstructive Surgery                    | EM |   | Y | Y |   |   |
| 7  | Gast               | 2014 | Plastic & Reconstructive Surgery                      | EM |   |   | Y | Y |   |
| 8  | Gaughan            | 2008 | Research Evaluation                                   | EM |   |   |   | Y |   |
| 9  | Gefen              | 2011 | Journal of Biomechanics                               | LE | Y |   | Y |   |   |
| 10 | Giminez-Toledo     | 2016 | Scientometrics                                        | EM |   |   |   | Y |   |
| 11 | Glänzel            | 2014 | Transinformação                                       | ED |   |   | Y | Y |   |
| 12 | Good               | 2015 | Research Evaluation                                   | ED |   |   |   | Y |   |
| 13 | Gorraiz            | 2010 | LIBER Quarterly                                       | ED |   | Y |   | Y | Y |
| 14 | Gracza             | 2008 | Library Collections Acquisitions & Technical Services | ED |   |   | Y | Y |   |
| 15 | Grisso             | 2017 | Journal of Women's Health                             | EM | Y |   |   |   |   |
| 16 | Grzybowski         | 2017 | Clinics in Dermatology                                | ED |   |   |   | Y |   |
| 17 | Gumpenberger       | 2016 | Scientometrics.                                       | ED | Y |   | Y | Y | Y |
| 18 | Haddad             | 2014 | The Bone and Joint Journal                            | ED |   |   |   | Y |   |
| 19 | Haddow             | 2015 | Research Evaluation                                   | EM |   |   |   |   |   |
| 20 | Haeffner-Cavaillon | 2009 | Archivum Immunologiae et Therapiae Experimentalis     | ED | Y |   | Y | Y | Y |
| 21 | Halbach            | 2011 | Annals of Anatomy                                     | EM |   | Y | Y |   | Y |
| 22 | Hall               | 2015 | Tourism Management                                    | ED |   |   |   | Y |   |
| 23 | Halvorson          | 2016 | Implications for Training in the Health Professions   | EM |   | Y | Y |   |   |
| 24 | Hamidreza          | 2013 | Acta Informatica Medica                               | EM |   |   | Y |   |   |
| 25 | Hammarfelt         | 2017 | Research Evaluation                                   | EM | Y |   | Y | Y |   |
| 26 | Han                | 2013 | ISSI                                                  | EM | Y |   |   | Y | Y |
| 27 |                    |      |                                                       |    |   |   |   |   |   |
| 28 |                    |      |                                                       |    |   |   |   |   |   |
| 29 |                    |      |                                                       |    |   |   |   |   |   |
| 30 |                    |      |                                                       |    |   |   |   |   |   |
| 31 |                    |      |                                                       |    |   |   |   |   |   |
| 32 |                    |      |                                                       |    |   |   |   |   |   |
| 33 |                    |      |                                                       |    |   |   |   |   |   |
| 34 |                    |      |                                                       |    |   |   |   |   |   |
| 35 |                    |      |                                                       |    |   |   |   |   |   |
| 36 |                    |      |                                                       |    |   |   |   |   |   |
| 37 |                    |      |                                                       |    |   |   |   |   |   |
| 38 |                    |      |                                                       |    |   |   |   |   |   |
| 39 |                    |      |                                                       |    |   |   |   |   |   |
| 40 |                    |      |                                                       |    |   |   |   |   |   |
| 41 |                    |      |                                                       |    |   |   |   |   |   |
| 42 |                    |      |                                                       |    |   |   |   |   |   |
| 43 |                    |      |                                                       |    |   |   |   |   |   |
| 44 |                    |      |                                                       |    |   |   |   |   |   |
| 45 |                    |      |                                                       |    |   |   |   |   |   |
| 46 |                    |      |                                                       |    |   |   |   |   |   |
| 47 |                    |      |                                                       |    |   |   |   |   |   |

1  
2  
3  
4  
5  
6  
7  
8  
9  
10  
11  
12  
13  
14  
15  
16  
17  
18  
19  
20  
21  
22  
23  
24  
25  
26  
27  
28  
29  
30  
31  
32  
33  
34  
35  
36  
37  
38  
39  
40  
41  
42  
43  
44  
45  
46  
47

|           |      |                                                                                         |    |   |   |   |   |   |   |
|-----------|------|-----------------------------------------------------------------------------------------|----|---|---|---|---|---|---|
| Han       | 2010 | Journal of Animal and Veterinary Advances                                               | EM |   |   | Y | Y |   |   |
| Haslam    | 2009 | Research Evaluation                                                                     | EM |   | Y | Y | Y |   |   |
| Haslam    | 2010 | European Journal of Social Psychology                                                   | EM |   |   | Y | Y | Y | Y |
| Healy     | 2011 | Breast Cancer Research and Treatment                                                    | EM |   |   | Y |   |   |   |
| Heinzl    | 2012 | AIP Conference Proceedings                                                              | ED |   |   | Y | Y | Y |   |
| Henrekson | 2011 | The Manchester School                                                                   | EM |   | Y | Y | Y | Y |   |
| Herteliu  | 2017 | Publications                                                                            | EM |   |   | Y |   |   |   |
| Hew       | 2017 | Telematics and Informatics                                                              | EM |   | Y | Y | Y |   |   |
| Hicks     | 2015 | Nature                                                                                  | ED |   |   | Y | Y |   |   |
| Hicks     | 2015 | Nature                                                                                  | ED |   |   | Y | Y |   |   |
| Hoffman   | 2014 | 47th Hawaii International Conference on System Sciences                                 | O  |   |   | Y | Y |   | Y |
| Holliday  | 2010 | International Journal of General Medicine                                               | EM | Y |   |   | Y |   | Y |
| Houser    | 2017 | Leukos                                                                                  | ED |   |   | Y | Y |   |   |
| Hughes    | 2015 | International Journal of Radiation Oncology Biology Physics<br>NB Conference supplement | EM |   | Y | Y |   |   |   |
| Hunt      | 2011 | Acta Neuropsychiatrica                                                                  | ED |   |   | Y | Y |   |   |
| Hutchins  | 2016 | PLOS Biology                                                                            | EM |   |   |   |   |   | Y |
| Hyman     | 2014 | Molecular Biology of the Cell                                                           | ED |   |   |   |   |   |   |
| Ibrahim   | 2015 | New Library World                                                                       | EM | Y | Y | Y |   |   | Y |
| Ioannidis | 2016 | PLOS Biology                                                                            | EM |   | Y | Y |   |   | Y |
| Ion       | 2017 | Chirurgia                                                                               | RE |   |   | Y | Y | Y |   |
| Iyendar   | 2009 | Academic Medicine                                                                       | EM |   |   |   | Y |   | Y |

|    |         |      |                                                                                           |    |   |   |   |   |
|----|---------|------|-------------------------------------------------------------------------------------------|----|---|---|---|---|
| 1  |         |      |                                                                                           |    |   |   |   |   |
| 2  |         |      |                                                                                           |    |   |   |   |   |
| 3  |         |      |                                                                                           |    |   |   |   |   |
| 4  |         |      |                                                                                           |    |   |   |   |   |
| 5  | Jackson | 2015 | Medical Journal of Australia                                                              | ED | Y |   |   |   |
| 6  | Jackson | 2011 | PLOS One                                                                                  | EM |   |   |   | Y |
| 7  | Jacob   | 2007 | Scientometrics                                                                            | EM |   | Y | Y |   |
| 8  | Jacso   | 2010 | Online Information Review                                                                 | EM |   |   | Y | Y |
| 9  | Jacso   | 2008 | Online Information Review                                                                 | ED |   | Y |   |   |
| 10 |         |      |                                                                                           |    |   |   |   |   |
| 11 | Jalil   | 2013 | IEEE International Conference on Teaching, Assessment and Learning for Engineering (TALE) | EM |   |   | Y |   |
| 12 | Jamjoom | 2015 | Neurosciences                                                                             | EM |   | Y |   |   |
| 13 | Jamjoom | 2016 | World Neurosurgery                                                                        | EM |   | Y |   |   |
| 14 | Jan     | 2016 | Journal of Scientometric Research                                                         | EM |   | Y |   | Y |
| 15 | Javey   | 2012 | American Chemical Society                                                                 | ED |   | Y | Y |   |
| 16 | Jeang   | 2008 | Retrovirology                                                                             | ED |   | Y |   | Y |
| 17 | Jokic   | 2009 | Biochemia Medica                                                                          | ED |   | Y | Y | Y |
| 18 | Joshi   | 2014 | The Journal of Contemporary Dental Practice                                               | ED |   | Y |   | Y |
| 19 | Joynson | 2015 | f1000 Research                                                                            | EM |   |   |   |   |
| 20 | Kaatz   | 2015 | Academic Medicine                                                                         | EM | Y |   |   |   |
| 21 | Kaatz   | 2016 | Academic Medicine                                                                         | EM | Y |   |   |   |
| 22 | Kali    | 2015 | Indian Journal of Pharmacology                                                            | ED |   | Y |   | Y |
| 23 | Kalra   | 2013 | Journal of Neurosurgery-Pediatrics                                                        | EM |   |   | Y | Y |
| 24 | Kaltman | 2014 | Circulation Research                                                                      | EM |   | Y |   |   |
| 25 | Kapoor  | 2013 | The Annals of Medical and Health Sciences Research                                        | ED |   |   | Y |   |
| 26 | Kellner | 2008 | Anais Da Academia Brasileira De Ciencias                                                  | EM |   | Y |   |   |
| 27 |         |      |                                                                                           |    |   |   |   |   |
| 28 |         |      |                                                                                           |    |   |   |   |   |
| 29 |         |      |                                                                                           |    |   |   |   |   |
| 30 |         |      |                                                                                           |    |   |   |   |   |
| 31 |         |      |                                                                                           |    |   |   |   |   |
| 32 |         |      |                                                                                           |    |   |   |   |   |
| 33 |         |      |                                                                                           |    |   |   |   |   |
| 34 |         |      |                                                                                           |    |   |   |   |   |
| 35 |         |      |                                                                                           |    |   |   |   |   |
| 36 |         |      |                                                                                           |    |   |   |   |   |
| 37 |         |      |                                                                                           |    |   |   |   |   |
| 38 |         |      |                                                                                           |    |   |   |   |   |
| 39 |         |      |                                                                                           |    |   |   |   |   |
| 40 |         |      |                                                                                           |    |   |   |   |   |
| 41 |         |      |                                                                                           |    |   |   |   |   |
| 42 |         |      |                                                                                           |    |   |   |   |   |
| 43 |         |      |                                                                                           |    |   |   |   |   |
| 44 |         |      |                                                                                           |    |   |   |   |   |
| 45 |         |      |                                                                                           |    |   |   |   |   |
| 46 |         |      |                                                                                           |    |   |   |   |   |
| 47 |         |      |                                                                                           |    |   |   |   |   |

1  
2  
3  
4  
5  
6  
7  
8  
9  
10  
11  
12  
13  
14  
15  
16  
17  
18  
19  
20  
21  
22  
23  
24  
25  
26  
27  
28  
29  
30  
31  
32  
33  
34  
35  
36  
37  
38  
39  
40  
41  
42  
43  
44  
45  
46  
47

|             |      |                                                                        |    |   |   |   |   |   |   |
|-------------|------|------------------------------------------------------------------------|----|---|---|---|---|---|---|
| Khan        | 2013 | World Neurology                                                        | EM |   |   | Y |   |   |   |
| Knudson     | 2015 | Quest                                                                  | EM |   | Y |   |   |   |   |
| Kosmulski   | 2012 | Research Evaluation                                                    | ED |   | Y |   | Y |   |   |
| Krapivin    | 2009 | Complex Sciences                                                       | EM |   | Y | Y |   | Y | Y |
| Kreiman     | 2011 | Frontiers in Computational Neuroscience                                | ED | Y | Y |   | Y | Y |   |
| Kreines     | 2016 | Journal of Computer and Systems Sciences International                 | EM |   |   |   |   |   | Y |
| Kshetry     | 2013 | World Neurosurgery                                                     | ED |   |   | Y |   | Y |   |
| Kulasagareh | 2010 | European Archives of Oto-Rhino-Laryngology                             | EM |   |   | Y |   |   |   |
| Kulczycki   | 2017 | Journal of Informetrics                                                | ED |   |   | Y |   |   |   |
| Kumar       | 2009 | Iete Technical Review                                                  | ED |   | Y | Y | Y |   |   |
| Kuo         | 2017 | Computers in Human Behavior                                            | EM |   |   |   |   | Y |   |
| Lando       | 2014 | PLOS One                                                               | EM |   | Y | Y |   |   | Y |
| Lariviere   | 2010 | Journal of the American Society for Information Science and Technology | EM |   |   |   |   | Y |   |
| Lariviere   | 2016 | PLOS One                                                               | EM |   | Y |   |   |   |   |
| Lariviere   | 2011 | Journal of Informetrics                                                | EM |   |   |   |   | Y |   |
| Lauer       | 2015 | The New England Journal of Medicine                                    | ED | Y |   |   |   |   |   |
| Law         | 2013 | Asia Pacific Journal of Tourism Research                               | EM | Y | Y |   | Y |   |   |
| Lee         | 2009 | Journal of neurosurgery                                                | EM |   |   | Y |   |   |   |
| Leff        | 2009 | International Journal of COPD                                          | ED |   |   |   | Y |   |   |
| Leydesdorff | 2016 | Scientometrics                                                         | ED |   |   | Y | Y | Y |   |
| Li          | 2015 | Science                                                                | EM | Y |   |   |   |   |   |

|    |            |      |                                                                     |    |   |   |   |   |   |
|----|------------|------|---------------------------------------------------------------------|----|---|---|---|---|---|
| 1  |            |      |                                                                     |    |   |   |   |   |   |
| 2  |            |      |                                                                     |    |   |   |   |   |   |
| 3  |            |      |                                                                     |    |   |   |   |   |   |
| 4  |            |      |                                                                     |    |   |   |   |   |   |
| 5  |            |      | In: Nah FFH, Tan CH, eds. Hci in Business, Government, and          |    |   |   |   |   |   |
| 6  |            |      | Organizations: Ecommerce and Innovation, Pt I. Vol                  |    |   |   |   |   |   |
| 7  | Li         | 2016 | 97512016:61-71.                                                     | EM | Y |   |   |   |   |
| 8  |            |      |                                                                     |    |   |   |   |   |   |
| 9  | Liang      | 2015 | IEEE International Conference on Smart<br>City/SocialCom/SustainCom | EM |   |   |   |   | Y |
| 10 |            |      |                                                                     |    |   |   |   |   |   |
| 11 | Liao       | 2011 | Decision Support Systems                                            | EM |   | Y |   | Y |   |
| 12 | Lindner    | 2015 | PLOS One                                                            | EM | Y | Y |   |   |   |
| 13 |            |      |                                                                     |    |   |   |   |   |   |
| 14 | Lindner    | 2016 | American Journal of Evaluation                                      | EM | Y |   |   |   |   |
| 15 |            |      |                                                                     |    |   |   |   |   |   |
| 16 | Lippi      | 2009 | Clinical Chemistry and Laboratory Medicine                          | ED |   |   | Y | Y |   |
| 17 | Lippi      | 2013 | Clinica Chimica Acta                                                | EM |   |   | Y | Y |   |
| 18 |            |      |                                                                     |    |   |   |   |   |   |
| 19 | Lippi      | 2017 | Annals of Translational Medicine                                    | EM |   |   | Y | Y | Y |
| 20 | Lissoni    | 2011 | Industrial and Corporate Change                                     | EM |   |   |   | Y |   |
| 21 |            |      |                                                                     |    |   |   |   |   |   |
| 22 | Littman    | 2017 | Medical Education Online                                            | EM |   | Y | Y | Y |   |
| 23 |            |      |                                                                     |    |   |   |   |   |   |
| 24 | Liu        | 2011 | Management Information Systems                                      | EM |   | Y |   | Y | Y |
| 25 | Lopez      | 2015 | Journal of Surgical Education                                       | EM | Y |   | Y |   |   |
| 26 |            |      |                                                                     |    |   |   |   |   |   |
| 27 | Lopez      | 2015 | Journal of Hand Surgery America                                     | EM |   | Y | Y |   |   |
| 28 |            |      |                                                                     |    |   |   |   |   |   |
| 29 | Lortie     | 2013 | Scientometrics                                                      | EM |   | Y |   | Y |   |
| 30 | Lovegrove  | 2008 | BioScience                                                          | EM | Y |   | Y | Y |   |
| 31 | Lozano     | 2017 | Current Science                                                     | ED |   | Y | Y | Y |   |
| 32 |            |      |                                                                     |    |   |   |   |   |   |
| 33 | MacMasters | 2017 | Academic Psychiatry                                                 | EM |   | Y | Y |   |   |
| 34 | Maggio     | 2017 | Academic Medicine                                                   | EM |   |   | Y |   | Y |
| 35 |            |      |                                                                     |    |   |   |   |   |   |
| 36 | Mali       | 2017 | Science & Public Policy                                             | EM |   |   |   |   |   |
| 37 | Markel     | 2017 | Journal of Pediatric Surgery                                        | EM |   | Y | Y | Y |   |
| 38 |            |      |                                                                     |    |   |   |   |   |   |
| 39 |            |      |                                                                     |    |   |   |   |   |   |
| 40 |            |      |                                                                     |    |   |   |   |   |   |
| 41 |            |      |                                                                     |    |   |   |   |   |   |
| 42 |            |      |                                                                     |    |   |   |   |   |   |
| 43 |            |      |                                                                     |    |   |   |   |   |   |
| 44 |            |      |                                                                     |    |   |   |   |   |   |
| 45 |            |      |                                                                     |    |   |   |   |   |   |
| 46 |            |      |                                                                     |    |   |   |   |   |   |
| 47 |            |      |                                                                     |    |   |   |   |   |   |

1  
2  
3  
4  
5  
6  
7  
8  
9  
10  
11  
12  
13  
14  
15  
16  
17  
18  
19  
20  
21  
22  
23  
24  
25  
26  
27  
28  
29  
30  
31  
32  
33  
34  
35  
36  
37  
38  
39  
40  
41  
42  
43  
44  
45  
46  
47

|            |      |                                                                        |    |   |   |   |   |   |   |
|------------|------|------------------------------------------------------------------------|----|---|---|---|---|---|---|
| Markpin    | 2008 | Scientometrics                                                         | EM |   |   |   | Y |   | Y |
| Marsh      | 2008 | American Psychologist                                                  | EM | Y |   |   |   |   |   |
| Marshall   | 2017 | Otolaryngology—Head and Neck Surgery                                   | EM |   |   |   | Y |   |   |
| Marzolla   | 2016 | Journal of Informetrics                                                | EM | Y |   | Y |   | Y |   |
| Mas-Bleder | 2013 | Scientometrics                                                         | EM |   | Y |   |   | Y |   |
| Matsas     | 2012 | Brazilian Journal of Physics                                           | EM |   |   |   |   |   | Y |
| Maunder    | 2007 | La Revue Canadienne de Psychiatrie                                     | EM |   |   |   | Y | Y | Y |
| Maximin    | 2014 | RadioGraphics                                                          | ED | Y | Y |   | Y |   | Y |
| Mazloumian | 2011 | PLOS One                                                               | EM |   |   |   |   |   | Y |
| Mazmanian  | 2014 | Evaluation & the Health Professions                                    | RE |   |   |   |   | Y |   |
| McAlister  | 2011 | American Heart Association Journals                                    | ED |   | Y |   | Y |   |   |
| McGovern   | 2013 | Academic Medicine                                                      | EM | Y | Y |   |   | Y |   |
| Medo       | 2016 | Physical Review                                                        | EM |   |   |   | Y | Y |   |
| Meho       | 2008 | Journal of the American Society for Information Science and Technology | EM |   | Y | Y |   |   |   |
| Mester     | 2016 | Interdisciplinary Description of Complex Systems                       | ED |   | Y | Y | Y |   |   |
| Metcalf    | 2010 | Radiologic Technology                                                  | EM |   |   |   |   |   |   |
| Milone     | 2016 | American Journal of Orthopedics                                        | EM | Y |   | Y |   |   | Y |
| Minasny    | 2013 | PeerJ                                                                  | EM |   | Y | Y |   |   |   |
| Mingers    | 2015 | European Journal of Operational Research                               | ED |   | Y | Y |   | Y |   |
| Mingers    | 2009 | Journal of the Operational Research Society                            | EM |   | Y | Y |   |   |   |
| Mingers    | 2017 | Scientometrics                                                         | EM |   | Y |   |   |   |   |

|    |                  |      |                                                             |    |   |   |   |   |   |
|----|------------------|------|-------------------------------------------------------------|----|---|---|---|---|---|
| 1  |                  |      |                                                             |    |   |   |   |   |   |
| 2  |                  |      |                                                             |    |   |   |   |   |   |
| 3  |                  |      |                                                             |    |   |   |   |   |   |
| 4  |                  |      |                                                             |    |   |   |   |   |   |
| 5  | Mirnezami        | 2016 | Science and Public Policy                                   | EM |   | Y |   |   | Y |
| 6  | Misteli          | 2013 | The Journal of Cell Biology                                 | ED |   |   |   | Y |   |
| 7  |                  |      |                                                             |    |   |   |   |   |   |
| 8  |                  |      | Journal of the Association for Information Science and      |    |   |   |   |   |   |
| 9  | Moed             | 2015 | Technology                                                  | RE |   |   |   |   | Y |
| 10 | Moed             | 2009 | Archivum Immunologiae et Therapia Experimentalis            | ED |   |   | Y | Y | Y |
| 11 |                  |      |                                                             |    |   |   |   |   |   |
| 12 | Mooij            | 2014 | Scientometrics                                              | EM |   |   |   |   | Y |
| 13 |                  |      |                                                             |    |   |   |   |   | Y |
| 14 | Moppett          | 2011 | British Journal of Anaesthesia                              | EM | Y | Y | Y |   | Y |
| 15 | Moreira          | 2015 | PLOS One                                                    | EM |   |   | Y | Y | Y |
| 16 |                  |      |                                                             |    |   |   |   |   | Y |
| 17 | Morel            | 2009 | PLOS Neglected Tropic Diseases                              | EM |   |   | Y |   | Y |
| 18 | Moustaafa        | 2016 | Accountability in Research-Policies and Quality Assurance   | ED |   | Y |   |   |   |
| 19 |                  |      |                                                             |    |   |   |   |   |   |
| 20 | Murphy           | 2011 | Irish Journal of Medical Science                            | EM |   | Y |   | Y |   |
| 21 | Murphy           | 2017 | Nature                                                      | ED |   |   |   |   | Y |
| 22 |                  |      |                                                             |    |   |   |   |   |   |
| 23 |                  |      | Journal of the Association for Information Science and      |    |   |   |   |   |   |
| 24 | Mutz             | 2015 | Technology                                                  | EM | Y |   |   |   |   |
| 25 | Mutz             | 2012 | Zeitschrift fur Psychologie                                 | EM | Y |   |   |   |   |
| 26 |                  |      |                                                             |    |   |   |   |   |   |
| 27 |                  |      | Journal of The American Society for Information Science and |    |   |   |   |   |   |
| 28 | Nah              | 2009 | Technology                                                  | EM |   |   |   | Y | Y |
| 29 | Napolitano       | 2016 | Critical Care Medicine                                      | ED |   | Y |   |   | Y |
| 30 |                  |      |                                                             |    |   |   |   |   |   |
| 31 | Nature Editorial |      |                                                             |    |   |   |   |   |   |
| 32 | Office           | 2013 | Nature Letters                                              | ED |   | Y |   | Y |   |
| 33 |                  |      |                                                             |    |   |   |   |   |   |
| 34 | Nature Editorial |      |                                                             |    |   |   |   |   |   |
| 35 | Office           | 2017 | Nature                                                      | ED |   |   |   | Y |   |
| 36 | Neufeld          | 2011 | Research Evaluation                                         | EM | Y |   | Y |   |   |
| 37 |                  |      |                                                             |    |   |   |   |   |   |
| 38 | Neylon           | 2009 | PLOS Biology                                                | ED |   | Y |   | Y |   |
| 39 |                  |      |                                                             |    |   |   |   |   |   |
| 40 |                  |      |                                                             |    |   |   |   |   |   |
| 41 |                  |      |                                                             |    |   |   |   |   |   |
| 42 |                  |      |                                                             |    |   |   |   |   |   |
| 43 |                  |      |                                                             |    |   |   |   |   |   |
| 44 |                  |      |                                                             |    |   |   |   |   |   |
| 45 |                  |      |                                                             |    |   |   |   |   |   |
| 46 |                  |      |                                                             |    |   |   |   |   |   |
| 47 |                  |      |                                                             |    |   |   |   |   |   |



1  
2  
3  
4  
5  
6  
7  
8  
9  
10  
11  
12  
13  
14  
15  
16  
17  
18  
19  
20  
21  
22  
23  
24  
25  
26  
27  
28  
29  
30  
31  
32  
33  
34  
35  
36  
37  
38  
39  
40  
41  
42  
43  
44  
45  
46  
47

|                 |      |                                                         |    |   |   |   |   |   |   |
|-----------------|------|---------------------------------------------------------|----|---|---|---|---|---|---|
| Nicol           | 2007 | Medical Journal of Australia                            | EM | Y | Y |   | Y |   |   |
| Nicolini        | 2008 | Scientometrics                                          | EM |   |   |   | Y | Y |   |
| Niederkröthaler | 2011 | BMC Public Health                                       | EM |   |   |   |   |   | Y |
| Nielsen         | 2017 | Studies in Higher Education                             | EM |   |   |   | Y | Y |   |
| Nigam           | 2012 | Indian Journal of Dermatology, Venerology and Leprology | ED |   |   |   | Y |   |   |
| Nightingale     | 2013 | Nurse Education in Practice                             | EM |   | Y | Y | Y |   | Y |
| Nosek           | 2010 | Personality and Social Psychology Bulletin              | EM |   |   |   | Y |   | Y |
| Nykl            | 2015 | Journal of Informetrics                                 | EM | Y |   |   | Y | Y |   |
| O'Brien         | 2012 | Oikos                                                   | ED |   |   |   |   |   |   |
| O'Connor        | 2010 | European Journal of Cancer Care                         | ED |   |   |   | Y | Y |   |
| Okhovati        | 2016 | Global Journal of Health Science                        | EM | Y | Y | Y | Y | Y |   |
| Oliveira        | 2013 | Revista Paulista de Pediatria                           | EM |   | Y | Y | Y | Y |   |
| Oliveira        | 2011 | Arquivos Brasileiros de Cardiologia                     | EM |   | Y | Y | Y |   |   |
| Oliveira        | 2013 | Scientometrics                                          | EM |   | Y | Y | Y | Y |   |
| Ophhof          | 2009 | Netherlands Heart Journal                               | EM |   |   |   | Y | Y |   |
| Orduna-Malea    | 2015 | El Profesional de la Información                        | ED | Y | Y | Y | Y |   | Y |
| Osterloh        | 2015 | Evaluation Review                                       | EM | Y | Y |   | Y |   |   |
| Ouimet          | 2011 | Scientometrics                                          | EM |   |   |   | Y |   | Y |
| Pagani          | 2015 | Scientometrics                                          | RE |   | Y |   | Y |   | Y |
| Pagel           | 2011 | British Journal of Anaesthesia                          | EM |   |   |   | Y |   |   |
| Pagel           | 2011 | Anaesthesia                                             | EM |   |   |   | Y |   | Y |
| Pagel           | 2015 | Original Investigations in Education                    | EM |   | Y | Y |   | Y |   |

|    |               |      |                                                      |    |   |   |   |   |   |
|----|---------------|------|------------------------------------------------------|----|---|---|---|---|---|
| 1  |               |      |                                                      |    |   |   |   |   |   |
| 2  |               |      |                                                      |    |   |   |   |   |   |
| 3  |               |      |                                                      |    |   |   |   |   |   |
| 4  |               |      |                                                      |    |   |   |   |   |   |
| 5  | Paik          | 2014 | Surgical Education                                   | EM |   |   | Y |   |   |
| 6  | Pan           | 2014 | Science Reports                                      | EM |   |   | Y | Y | Y |
| 7  |               |      |                                                      |    |   |   |   |   |   |
| 8  | Pandit        | 2011 | Anaesthesia                                          | ED |   | Y | Y |   | Y |
| 9  |               |      |                                                      |    |   |   |   |   |   |
| 10 | Patel         | 2013 | Journal of the Royal Society of Medicine             | EM | Y | Y | Y | Y | Y |
| 11 | Patel         | 2011 | Journal of the Royal Society of Medicine             | RE |   | Y | Y | Y | Y |
| 12 |               |      |                                                      |    |   |   |   |   |   |
| 13 | Patrow        | 2011 | Journal of Postgraduate Medicine                     | ED |   |   | Y |   |   |
| 14 | Pepe          | 2012 | PLOS One                                             | EM |   |   | Y |   | Y |
| 15 |               |      |                                                      |    |   |   |   |   |   |
| 16 | Pereyra-Rojas | 2017 | Frontiers in Psychology                              | EM | Y |   | Y |   | Y |
| 17 |               |      |                                                      |    |   |   |   |   |   |
| 18 | Perlin        | 2017 | Journal of Informetrics                              | EM |   | Y |   | Y |   |
| 19 |               |      |                                                      |    |   |   |   |   |   |
| 20 | Persson       | 2014 | Acta Physiologica                                    | ED |   |   |   |   | Y |
| 21 | Peters        | 2017 | Journal of Infometrics                               | ED |   |   |   | Y |   |
| 22 | Petersen      | 2013 | Journal of Informetrics                              | EM |   |   |   |   | Y |
| 23 |               |      |                                                      |    |   |   |   |   |   |
| 24 | Petersen      | 2010 | Physical Review                                      | EM |   |   |   |   |   |
| 25 | Pinnock       | 2012 | Nurse Education Today                                | ED |   | Y |   | Y |   |
| 26 |               |      |                                                      |    |   |   |   |   |   |
| 27 | Pöder         | 2017 | Trames-Journal of the Humanities and Social Sciences | EM |   |   | Y |   | Y |
| 28 |               |      |                                                      |    |   |   |   |   |   |
| 29 | Prabhu        | 2017 | World Neurosurgery                                   | ED |   |   | Y | Y | Y |
| 30 |               |      |                                                      |    |   |   |   |   |   |
| 31 | Prathap       | 2016 | Scientometrics                                       | EM |   | Y |   | Y |   |
| 32 | Prathap       | 2012 | Scientometrics                                       | EM |   |   | Y | Y | Y |
| 33 | Prathap       | 2014 | Scientometrics                                       | EM |   |   | Y |   | Y |
| 34 |               |      |                                                      |    |   |   |   |   |   |
| 35 | Prathap       | 2017 | Current Science                                      | ED |   | Y | Y | Y | Y |
| 36 | Pringle       | 2008 | Learned Publishing                                   | ED |   | Y | Y | Y | Y |
| 37 |               |      |                                                      |    |   |   |   |   |   |
| 38 | Pshetizky     | 2009 | Journal of the American Board of Family Medicine     | EM |   | Y |   | Y |   |
| 39 |               |      |                                                      |    |   |   |   |   |   |
| 40 |               |      |                                                      |    |   |   |   |   |   |
| 41 |               |      |                                                      |    |   |   |   |   |   |
| 42 |               |      |                                                      |    |   |   |   |   |   |
| 43 |               |      |                                                      |    |   |   |   |   |   |
| 44 |               |      |                                                      |    |   |   |   |   |   |
| 45 |               |      |                                                      |    |   |   |   |   |   |
| 46 |               |      |                                                      |    |   |   |   |   |   |
| 47 |               |      |                                                      |    |   |   |   |   |   |

1  
2  
3  
4  
5  
6  
7  
8  
9  
10  
11  
12  
13  
14  
15  
16  
17  
18  
19  
20  
21  
22  
23  
24  
25  
26  
27  
28  
29  
30  
31  
32  
33  
34  
35  
36  
37  
38  
39  
40  
41  
42  
43  
44  
45  
46  
47

|                   |      |                                                                                 |    |   |   |   |   |   |   |
|-------------------|------|---------------------------------------------------------------------------------|----|---|---|---|---|---|---|
| Pugh Jr           | 2013 | Journal of General Physiology                                                   | ED |   |   |   |   | Y |   |
| Pulina            | 2007 | Italian Journal of Animal Science                                               | EM |   | Y | Y | Y | Y |   |
| Pyke              | 2015 | BioScience                                                                      | ED |   |   |   |   |   | Y |
| Qi                | 2016 | Scientometrics                                                                  | EM |   | Y |   |   |   |   |
| Quigley           | 2012 | Journal of Cancer Education                                                     | EM |   |   |   | Y |   |   |
| Rad               | 2012 | Academic Radiology                                                              | EM |   |   |   | Y |   |   |
| Radicchi          | 2008 | Proceedings of the National Academy of Sciences of the United States of America | EM |   | Y | Y |   | Y | Y |
| Radicchi          | 2012 | Journal of Informetrics                                                         | EM |   | Y |   |   | Y |   |
| Raj               | 2016 | Academic Medicine                                                               | EM |   | Y | Y |   | Y |   |
| Ramasesha         | 2011 | Current Science                                                                 | ED |   | Y | Y | Y | Y |   |
| Rana              | 2013 | Journal of Cancer Education                                                     | EM |   | Y | Y |   |   |   |
| Ravenscroft       | 2017 | PLOS One                                                                        | EM |   |   |   | Y | Y | Y |
| Rey-Rocha         | 2015 | Scientometrics                                                                  | EM |   | Y |   |   |   |   |
| Rezek             | 2011 | Academic Radiology                                                              | EM |   |   |   |   |   |   |
| Ribas             | 2015 | Proceedings of the 24th International Conference on World Wide Web              | O  | Y | Y | Y |   |   | Y |
| Ribas             | 2015 | arXiv                                                                           | ED |   |   |   |   |   | Y |
| Ricker            | 2009 | Interciencia                                                                    | ED | Y |   |   |   | Y | Y |
| Rieder            | 2010 | Langenbeck's Archives of Surgery                                                | ED |   |   |   | Y |   | Y |
| Robinson          | 2011 | Journal of School Psychology                                                    | ED |   |   |   |   | Y |   |
| Rodriguez-Navarro | 2011 | PLOS One                                                                        | EM |   |   |   |   |   | Y |
| Ronai             | 2012 | Pigment Cell and Melanoma research                                              | ED | Y | Y |   |   |   |   |

|    |               |      |                                                |    |   |   |   |   |   |
|----|---------------|------|------------------------------------------------|----|---|---|---|---|---|
| 1  |               |      |                                                |    |   |   |   |   |   |
| 2  |               |      |                                                |    |   |   |   |   |   |
| 3  |               |      |                                                |    |   |   |   |   |   |
| 4  |               |      |                                                |    |   |   |   |   |   |
| 5  | Rons          | 2009 | Research Evaluation                            | EM |   |   |   |   |   |
| 6  | Rosati        | 2016 | Journal of Cardiac Surgery                     | EM |   |   | Y |   |   |
| 7  |               |      |                                                |    |   |   |   |   |   |
| 8  | Ruane         | 2009 | Scientometrics                                 | EM |   | Y | Y |   | Y |
| 9  |               |      |                                                |    |   |   |   |   |   |
| 10 | Saad          | 2010 | Scientometrics                                 | EM |   |   | Y |   |   |
| 11 | Safdar        | 2015 | Society for Academic Emergency Medicine (SAEM) | EM | Y |   |   |   |   |
| 12 |               |      |                                                |    |   |   |   |   |   |
| 13 | Sahel         | 2011 | Science Translational Medicine                 | ED |   | Y | Y | Y |   |
| 14 | Sahoo         | 2017 | Omega                                          | EM |   | Y | Y | Y | Y |
| 15 |               |      |                                                |    |   |   |   |   |   |
| 16 | Saleem        | 2011 | Internal Archives of Medicine                  | ED |   |   | Y | Y |   |
| 17 | Sangam        | 2008 | Current Science                                | ED |   |   | Y | Y |   |
| 18 |               |      |                                                |    |   |   |   |   |   |
| 19 | Santangelo    | 2017 | Molecular Biology of the Cell                  | ED |   |   |   | Y | Y |
| 20 |               |      |                                                |    |   |   |   |   |   |
| 21 | Saraykar      | 2017 | Academic Psychiatry                            | EM |   |   |   | Y |   |
| 22 |               |      |                                                |    |   |   |   |   |   |
| 23 | Sarli         | 2016 | Missouri Medicine                              | ED |   |   |   | Y | Y |
| 24 |               |      |                                                |    |   |   |   |   | Y |
| 25 | Satyanarayana | 2008 | Indian Journal of Medical Research             | ED |   |   |   | Y | Y |
| 26 |               |      |                                                |    |   |   |   |   |   |
| 27 | Saxena        | 2013 | Journal of Pharmacology Pharmacotherapeutics   | EM |   |   |   | Y | Y |
| 28 |               |      |                                                |    |   |   |   |   | Y |
| 29 | Sebire        | 2008 | Ultrasound in Obstetrics and Gynaecology       | ED |   |   |   | Y | Y |
| 30 |               |      |                                                |    |   |   |   |   |   |
| 31 | Selek         | 2014 | Scientometrics                                 | EM |   | Y | Y |   | Y |
| 32 |               |      |                                                |    |   |   |   |   |   |
| 33 | Seo           | 2017 | Management Decision                            | EM |   |   |   |   | Y |
| 34 |               |      |                                                |    |   |   |   |   |   |
| 35 | Shanta        | 2013 | Journal of Medical Physics                     | ED |   | Y | Y | Y |   |
| 36 |               |      |                                                |    |   |   |   |   |   |
| 37 | Shibayama     | 2015 | Research Policy                                | EM |   | Y |   | Y |   |
| 38 |               |      |                                                |    |   |   |   |   |   |
| 39 | Sibbald       | 2015 | Journal of the Medical Library Association     | ED |   |   |   |   | Y |
| 40 |               |      |                                                |    |   |   |   |   |   |
| 41 | Simons        | 2008 | Science                                        | ED |   |   |   | Y |   |
| 42 |               |      |                                                |    |   |   |   |   |   |
| 43 | Sittig        | 2015 | MEDINFO 2015: eHealth-enabled Health           | EM |   | Y | Y |   | Y |
| 44 |               |      |                                                |    |   |   |   |   |   |
| 45 |               |      |                                                |    |   |   |   |   |   |
| 46 |               |      |                                                |    |   |   |   |   |   |
| 47 |               |      |                                                |    |   |   |   |   |   |

1  
2  
3  
4  
5  
6  
7  
8  
9  
10  
11  
12  
13  
14  
15  
16  
17  
18  
19  
20  
21  
22  
23  
24  
25  
26  
27  
28  
29  
30  
31  
32  
33  
34  
35  
36  
37  
38  
39  
40  
41  
42  
43  
44  
45  
46  
47

|                  |      |                                                                                 |    |   |   |   |   |   |
|------------------|------|---------------------------------------------------------------------------------|----|---|---|---|---|---|
| Slim             | 2017 | Anaesthesia, Critical Care & Pain Medicine                                      | ED |   | Y | Y |   | Y |
| Slyder           | 2011 | Scientometrics                                                                  | EM |   | Y |   |   |   |
| Smeyers          | 2011 | Journal of Philosophy of Education                                              | ED |   | Y |   | Y |   |
| Smith            | 2008 | Bone & Joint Journal                                                            | ED |   |   |   | Y |   |
| Soares de Araujo | 2011 | Revista Brasileira de Medicina do Esporte                                       | EM |   |   | Y | Y | Y |
| Sobhy            | 2016 | Embo Reports                                                                    | ED |   |   |   | Y |   |
| Sobkowicz        | 2015 | Journal of Artificial Societies and Social Simulation                           | EM | Y |   |   |   |   |
| Solarino         | 2012 | Annals of Geophysics                                                            | RE |   | Y | Y | Y | Y |
| Sood             | 2015 | Eplasty                                                                         | EM |   |   | Y |   |   |
| Sorenson         | 2011 | Journal of Parkinson's Disease                                                  | EM |   | Y | Y |   | Y |
| Spaan            | 2009 | Medical & Biological Engineering & Computing                                    | ED |   |   | Y | Y |   |
| Spearman         | 2010 | Journal of Neurosurgery                                                         | EM |   |   | Y |   |   |
| Spreckelsen      | 2011 | BMC Medical Informatics and Decision Making                                     | EM |   |   | Y | Y | Y |
| Staller          | 2017 | Qualitative Social Work                                                         | ED |   | Y | Y |   | Y |
| Stallings        | 2013 | Proceedings of the National Academy of Sciences of the United States of America | EM |   | Y | Y |   | Y |
| Street           | 2009 | Health Research Policy and System                                               | EM | Y |   |   |   |   |
| Stroebe          | 2010 | American Psychologist                                                           | ED |   | Y |   | Y |   |
| Stroobants       | 2013 | Nature                                                                          | ED |   |   |   |   |   |
| Sturmer          | 2013 | Revista Brasileira De Fisioterapia                                              | EM |   | Y | Y |   |   |
| Suiter           | 2015 | The Journal of Academic Librarianship                                           | EM |   |   | Y | Y | Y |
| Suminski         | 2012 | The Journal of the American Osteopathic Association                             | EM |   | Y |   | Y | Y |

|    |                  |      |                                              |    |   |   |   |   |   |   |
|----|------------------|------|----------------------------------------------|----|---|---|---|---|---|---|
| 1  |                  |      |                                              |    |   |   |   |   |   |   |
| 2  |                  |      |                                              |    |   |   |   |   |   |   |
| 3  |                  |      |                                              |    |   |   |   |   |   |   |
| 4  |                  |      |                                              |    |   |   |   |   |   |   |
| 5  | Surla            | 2017 | The Electronic Library                       | ED |   | Y |   | Y |   | Y |
| 6  | Susarla          | 2015 | Plastic and Reconstructive surgery           | EM |   | Y | Y |   |   |   |
| 7  | Susarla          | 2015 | Journal of Dental Education                  | EM | Y |   | Y |   |   |   |
| 8  | Susarla          | 2015 | Journal of Dental Education                  | EM | Y |   | Y |   |   |   |
| 9  | Sutherland       | 2011 | PLOS One                                     | EM | Y |   |   | Y |   |   |
| 10 | Sutherland       | 2011 | PLOS One                                     | EM | Y |   |   | Y |   |   |
| 11 | Svider           | 2013 | Laryngoscope                                 | EM |   |   |   | Y |   |   |
| 12 | Svider           | 2013 | Laryngoscope                                 | EM |   |   |   | Y |   |   |
| 13 | Svider           | 2014 | Ophthalmology                                | EM | Y |   |   | Y |   |   |
| 14 | Svider           | 2013 | Laryngoscope                                 | EM | Y |   |   | Y |   |   |
| 15 | Svider           | 2013 | Laryngoscope                                 | EM |   |   |   | Y | Y |   |
| 16 | Svider           | 2013 | Laryngoscope                                 | EM |   |   |   | Y | Y |   |
| 17 | Swanson          | 2016 | Annals of Plastic Surgery                    | EM |   |   |   | Y |   |   |
| 18 | Swanson          | 2016 | Annals of Plastic Surgery                    | EM |   |   |   | Y |   |   |
| 19 | Szklo            | 2008 | Epidemiology                                 | ED |   |   |   | Y |   |   |
| 20 | Szklo            | 2008 | Epidemiology                                 | ED |   |   |   | Y |   |   |
| 21 | Szymanski        | 2012 | Information Sciences                         | EM |   |   |   | Y | Y | Y |
| 22 | Szymanski        | 2012 | Information Sciences                         | EM |   |   |   | Y | Y | Y |
| 23 | Taborsky         | 2007 | International Journal of Behavioural Biology | ED | Y |   |   |   |   |   |
| 24 | Tan              | 2016 | The Annals of Applied Statistics             | EM |   | Y | Y | Y | Y | Y |
| 25 | Tan              | 2016 | The Annals of Applied Statistics             | EM |   | Y | Y | Y | Y | Y |
| 26 | Tandon           | 2015 | National Academy Science Letters-India       | ED |   |   |   | Y |   |   |
| 27 | Taylor           | 2015 | Poultry Science                              | ED |   |   |   | Y | Y | Y |
| 28 | Taylor           | 2015 | Poultry Science                              | ED |   |   |   | Y | Y | Y |
| 29 | Teixeira         | 2013 | PLOS One                                     | EM |   |   |   | Y |   |   |
| 30 | Tenreiro Machado | 2017 | Entropy                                      | EM | Y |   |   |   | Y |   |
| 31 | Tenreiro Machado | 2017 | Entropy                                      | EM | Y |   |   |   | Y |   |
| 32 | Thelwall         | 2017 | Aslib Journal of Information Management      | EM |   |   |   |   |   | Y |
| 33 | Thelwall         | 2017 | Aslib Journal of Information Management      | EM |   |   |   |   |   | Y |
| 34 | Therattil        | 2016 | Annals of Plastic Surgery                    | EM |   |   |   | Y |   |   |
| 35 | Thomaz           | 2011 | Arquivos Brasileiros De Cardiologia          | ED |   |   |   | Y | Y | Y |
| 36 | Thomaz           | 2011 | Arquivos Brasileiros De Cardiologia          | ED |   |   |   | Y | Y | Y |
| 37 | Thorngate        | 2014 | Advances in Social Simulation                | EM | Y |   |   |   |   |   |
| 38 | Tijdkink         | 2016 | BMJ Open                                     | EM |   |   |   |   |   |   |
| 39 |                  |      |                                              |    |   |   |   |   |   |   |
| 40 |                  |      |                                              |    |   |   |   |   |   |   |
| 41 |                  |      |                                              |    |   |   |   |   |   |   |
| 42 |                  |      |                                              |    |   |   |   |   |   |   |
| 43 |                  |      |                                              |    |   |   |   |   |   |   |
| 44 |                  |      |                                              |    |   |   |   |   |   |   |
| 45 |                  |      |                                              |    |   |   |   |   |   |   |
| 46 |                  |      |                                              |    |   |   |   |   |   |   |
| 47 |                  |      |                                              |    |   |   |   |   |   |   |

1  
2  
3  
4  
5  
6  
7  
8  
9  
10  
11  
12  
13  
14  
15  
16  
17  
18  
19  
20  
21  
22  
23  
24  
25  
26  
27  
28  
29  
30  
31  
32  
33  
34  
35  
36  
37  
38  
39  
40  
41  
42  
43  
44  
45  
46  
47

|                   |      |                                                                                 |    |   |   |   |   |   |   |
|-------------------|------|---------------------------------------------------------------------------------|----|---|---|---|---|---|---|
| Timothy           | 2015 | Tourism Management                                                              | ED |   |   |   | Y |   |   |
| Torrise           | 2014 | Scientometrics                                                                  | EM | Y |   | Y | Y | Y |   |
| Tricco            | 2017 | PLOS One                                                                        | RE | Y |   |   |   |   |   |
| Trueger           | 2015 | Annals of Emergency Medicine                                                    | ED |   |   | Y | Y |   | Y |
| Tschudy           | 2016 | Journal of Pediatrics                                                           | EM |   |   | Y |   | Y |   |
| Tse               | 2008 | Nature                                                                          | ED |   |   | Y | Y |   | Y |
| Tuitt             | 2011 | Canadian Journal of Gastroenterology                                            | EM |   |   | Y | Y | Y |   |
| Usmani            | 2011 | Sudanese Journal of Paediatrics                                                 | ED |   |   | Y | Y |   |   |
| Valsangkar        | 2016 | Surgery                                                                         | EM |   | Y | Y |   | Y |   |
| van Arensbergen   | 2012 | Higher Education Policy                                                         | EM | Y |   |   |   |   |   |
| van den Besselaar | 2009 | Research Evaluation                                                             | EM | Y | Y |   |   |   |   |
| van Eck           | 2013 | PLOS One                                                                        | EM |   | Y |   |   |   |   |
| van Leeuwen       | 2008 | Research Evaluation                                                             | EM |   |   | Y |   |   |   |
| van Leeuwen       | 2012 | Research Evaluation                                                             | EM | Y |   |   |   |   |   |
| van Noorden       | 2010 | Nature                                                                          | ED |   |   | Y | Y | Y | Y |
| van Wesel         | 2016 | Science and Engineering Ethics                                                  | EM |   |   |   |   |   |   |
| Vaughan           | 2017 | Scientometrics                                                                  | EM |   |   |   |   |   | Y |
| Verma             | 2015 | Proceedings of the National Academy of Sciences of the United States of America | ED | Y |   |   | Y |   |   |
| Vico              | 2015 | Prometheus                                                                      | EM | Y |   |   |   |   |   |
| Vieira            | 2011 | Scientometrics                                                                  | EM |   |   |   |   |   | Y |
| Vinkler           | 2012 | Journal of Informetrics                                                         | ED |   |   |   |   | Y |   |

|    |              |      |                                                                                                                                                  |    |   |   |   |   |   |
|----|--------------|------|--------------------------------------------------------------------------------------------------------------------------------------------------|----|---|---|---|---|---|
| 1  |              |      |                                                                                                                                                  |    |   |   |   |   |   |
| 2  |              |      |                                                                                                                                                  |    |   |   |   |   |   |
| 3  |              |      |                                                                                                                                                  |    |   |   |   |   |   |
| 4  |              |      |                                                                                                                                                  |    |   |   |   |   |   |
| 5  | Vinyard      | 2016 | Computers in libraries                                                                                                                           | ED |   |   | Y | Y | Y |
| 6  | von Bartheld | 2015 | PeerJ                                                                                                                                            | EM |   |   | Y | Y | Y |
| 7  |              |      |                                                                                                                                                  |    |   |   |   |   |   |
| 8  |              |      | Archives of Disease in Childhood-Education and Practice                                                                                          |    |   |   |   |   |   |
| 9  | Wacogne      | 2016 | Edition                                                                                                                                          | ED |   |   | Y | Y | Y |
| 10 |              |      |                                                                                                                                                  |    |   |   |   |   |   |
| 11 | Wagner       | 2012 | Research Evaluation                                                                                                                              | ED |   | Y |   |   | Y |
| 12 |              |      |                                                                                                                                                  |    |   |   |   |   |   |
| 13 | Waisbren     | 2008 | Journal of Women's Health                                                                                                                        | EM |   |   |   |   |   |
| 14 |              |      |                                                                                                                                                  |    |   |   |   |   |   |
| 15 | Walijee      | 2015 | Plastic and Reconstructive Surgery                                                                                                               | ED |   |   |   |   | Y |
| 16 |              |      |                                                                                                                                                  |    |   |   |   |   |   |
| 17 | Walker       | 2010 | BMC Medical Education                                                                                                                            | EM |   | Y |   | Y | Y |
| 18 |              |      |                                                                                                                                                  |    |   |   |   |   |   |
| 19 | Wallace      | 2012 | PLOS One                                                                                                                                         | EM | Y | Y |   |   |   |
| 20 |              |      |                                                                                                                                                  |    |   |   |   |   |   |
| 21 |              |      | Journal of the American Society for Information Science and                                                                                      |    |   |   |   |   |   |
| 22 |              |      | Technology                                                                                                                                       | EM | Y | Y |   | Y |   |
| 23 |              |      |                                                                                                                                                  |    |   |   |   |   |   |
| 24 | Waltman      | 2013 | In: Gorraiz J, Schiebel E, Gumpenberger C, Horlesberger M, Moed H, eds. 14th International Society of Scientometrics and Informetrics Conference | EM |   | Y | Y |   | Y |
| 25 |              |      |                                                                                                                                                  |    |   |   |   |   |   |
| 26 | Waltman      | 2013 | Journal of Informetrics                                                                                                                          | EM |   | Y |   |   |   |
| 27 |              |      |                                                                                                                                                  |    |   |   |   |   |   |
| 28 | Wang         | 2013 | Science                                                                                                                                          | EM |   |   | Y | Y | Y |
| 29 |              |      |                                                                                                                                                  |    |   |   |   |   | Y |
| 30 | Ward         | 2012 | Anaesthesia                                                                                                                                      | ED |   |   |   |   |   |
| 31 |              |      |                                                                                                                                                  |    |   |   |   |   |   |
| 32 | Watson       | 2015 | Journal of Pediatric Surgery                                                                                                                     | EM |   | Y | Y |   |   |
| 33 |              |      |                                                                                                                                                  |    |   |   |   |   |   |
| 34 | Welk         | 2014 | Research Quarterly for Exercise and Sport                                                                                                        | ED |   |   |   | Y |   |
| 35 |              |      |                                                                                                                                                  |    |   |   |   |   |   |
| 36 | Wieczorek    | 2016 | Financial Environment and Business Development                                                                                                   | ED |   | Y | Y | Y |   |
| 37 |              |      |                                                                                                                                                  |    |   |   |   |   |   |
| 38 | Wildgaard    | 2014 | Scientometrics                                                                                                                                   | RE |   | Y | Y | Y | Y |
| 39 |              |      |                                                                                                                                                  |    |   |   |   |   |   |
| 40 | Williamson   | 2008 | Family Medicine                                                                                                                                  | EM |   |   |   |   | Y |
| 41 |              |      |                                                                                                                                                  |    |   |   |   |   |   |
| 42 | Wootton      | 2013 | Health Research Policy and Systems                                                                                                               | EM | Y |   |   | Y | Y |
| 43 |              |      |                                                                                                                                                  |    |   |   |   |   |   |
| 44 | Würtz        | 2016 | Annals of Epidemiology                                                                                                                           | RE |   |   | Y |   |   |
| 45 |              |      |                                                                                                                                                  |    |   |   |   |   |   |
| 46 |              |      |                                                                                                                                                  |    |   |   |   |   |   |
| 47 |              |      |                                                                                                                                                  |    |   |   |   |   |   |



1  
2  
3  
4  
5  
6  
7  
8  
9  
10  
11  
12  
13  
14  
15  
16  
17  
18  
19  
20  
21  
22  
23  
24  
25  
26  
27  
28  
29  
30  
31  
32  
33  
34  
35  
36  
37  
38  
39  
40  
41  
42  
43  
44  
45  
46  
47

|             |      |                                                   |    |   |   |   |     |
|-------------|------|---------------------------------------------------|----|---|---|---|-----|
| Wykes       | 2013 | Journal of Mental Health                          | ED |   | Y | Y |     |
| Yaminfirooz | 2015 | The Electronic Library                            | EM |   | Y |   | Y   |
| Yang        | 2013 | Journal of Informetrics                           | EM | Y | Y |   | Y   |
| Yates       | 2015 | Source Code for Biology and Medicine              | EM | Y |   |   |     |
| Yu          | 2016 | Computers in Human Behaviour                      | EM |   |   |   | Y   |
| Ze          | 2012 | International Conference on Intelligent Computing | EM |   | Y | Y |     |
| Zhang       | 2012 | Scientometrics                                    | EM |   |   |   | Y   |
| Zhang       | 2017 | PLOS One                                          | EM |   | Y |   | Y   |
| Zhang       | 2012 | Scientometrics                                    | EM |   | Y | Y | Y   |
| Zhao        | 2014 | Scientometrics                                    | EM | Y |   |   | Y Y |
| Zhou        | 2012 | New Journal of Physics                            | EM |   |   | Y | Y   |
| Zhu         | 2015 | arXiv                                             | EM |   |   |   | Y   |
| Zhuo        | 2008 | Molecular Pain                                    | EM | Y |   | Y | Y   |
| Zima        | 2008 | Biochemia Medica                                  | ED |   |   | Y | Y   |
| Zou         | 2016 | Scientometrics                                    | EM |   | Y | Y | Y   |
| Zupetic     | 2017 | Academic Radiology                                | EM |   | Y |   |     |
| Zyczkowski  | 2010 | Scientometrics                                    | ED |   |   |   | Y   |

*^Empirical (EM); Editorial/Opinion (ED); Review (RE); Other (O).*

## Appendix 2: New models and metrics for assessing an individual researcher's achievement (2007-2017)

| First author | Year | Journal name                                  | Level      | Metric or Model | Name                          | Basis                                     | Description                                                                                                                                                                                                                                                                                                                                                         |
|--------------|------|-----------------------------------------------|------------|-----------------|-------------------------------|-------------------------------------------|---------------------------------------------------------------------------------------------------------------------------------------------------------------------------------------------------------------------------------------------------------------------------------------------------------------------------------------------------------------------|
| Anderson     | 2008 | Scientometrics                                | Researcher | Metric          | Tapered h-index               | h-index                                   | It accounts for the tapered distribution of citations.                                                                                                                                                                                                                                                                                                              |
| Aragon       | 2013 | Nature Scientific Reports                     | Both       | Metric          | Scientist impact ( $\Phi$ )   | Author contributions and citation counts  | Instead of the total number of citations, the proposed measure $\Phi$ (Scientist Impact) aims at discerning the genuine number of people (specifically lead authors) the paper (or first author) has had an impact upon by removing self-citation. In other words, $\Phi$ aims at measuring the paper's reach.                                                      |
| Assimakis    | 2010 | Scientometrics                                | Researcher | Metric          | The Golden Productivity Index | Author contribution and publication count | A rank dependent index that measures the productivity of an individual researcher by evaluating the number of papers as well as the rank of co-authorship. It emphasizes the first author's contribution.                                                                                                                                                           |
| Bai          | 2016 | PLOS One                                      | Researcher | Metric          | COIRank algorithm             | Network analysis                          | Quantifies scientific impact by reproducing the accumulated COI relationship in the scientific community. COIRank focuses on improving PageRank though setting a weight for PageRank algorithm and promotes the performance in identifying influential articles. It therefore accounts for self-citation and citation by others at the same institution.            |
| Belikov      | 2015 | f1000 Research                                | Researcher | Metric          | L-index                       | h-index and author contribution           | Accounts for co-author contribution by designating citations to each individual author according to their order on a paper. It also considers the age of publications, favoring newer ones. However, if a scientist has made a significant scientific breakthrough and ceases publications, his or her L-index will remain high regardless. It ranges from 0.0-9.9. |
| Bini         | 2008 | Electronic Transactions on Numerical Analysis | Both       | Metric          | Information not available     | Citation count                            | Proposes to integrate models for evaluating papers, authors, and journals based on citations, co-authorship and publications. After the one-class model for ranking scientific publications, they introduced the two-class model which ranks papers and authors, and the three-class model for ranking papers, authors, and journals.                               |

1  
2  
3  
4  
5  
6  
7  
8  
9  
10  
11  
12  
13  
14  
15  
16  
17  
18  
19  
20  
21  
22  
23  
24  
25  
26  
27  
28  
29  
30  
31  
32  
33  
34  
35  
36  
37  
38  
39  
40  
41  
42  
43  
44  
45  
46  
47

|             |      |                                                   |            |        |                                                         |                            |                                                                                                                                                                                                                                                                                                                                                                                                                                                                                                                                                                                                                                                                                                                                                                   |
|-------------|------|---------------------------------------------------|------------|--------|---------------------------------------------------------|----------------------------|-------------------------------------------------------------------------------------------------------------------------------------------------------------------------------------------------------------------------------------------------------------------------------------------------------------------------------------------------------------------------------------------------------------------------------------------------------------------------------------------------------------------------------------------------------------------------------------------------------------------------------------------------------------------------------------------------------------------------------------------------------------------|
| Bloching    | 2013 | South African Journal of Science                  | Article    | Metric | TAPSIF-temporally averaged paper-specific impact factor | Citation count and IF      | Calculated from a paper’s average number of citations per year (including the publication year) combined with bonus cites for the publishing journal’s prestige—which is taken as the journal impact factor from the publication year. Annual TAPSIF values of all the papers by an author can be combined to measure the overall scientific relevance of that author (temporally averaged author-specific impact factor TAASIF).                                                                                                                                                                                                                                                                                                                                 |
| Bollen      | 2016 | Scientometrics                                    | Researcher | Model  | Equal Allocation Model                                  | Peer-review                | A novel model in which each researcher is allocated funding and is required to donate a proportion of that funding to other researchers—hence uses crowd wisdom to fund scientists.                                                                                                                                                                                                                                                                                                                                                                                                                                                                                                                                                                               |
| Caminiti    | 2015 | BMC Health Services Research                      | Researcher | Metric | Information not available                               | Citation count             | This work in progress suggests a mixture of 12 easily retrievable indicators (bibliometric and citation parameters, as well as “hidden” activities such as teaching, mentoring etc). The weighting system was constructed considering the hypothesized effort for all indicators. The chosen indicators and attributed scores still remain to be validated. Modified from Wooton, Health Res Policy Syst. 2013;11:2; Smith, Br Med J. 2001;323(7312):528–8.; and Mezrich J Am Coll Radiol. 2007;4(7):471–8.                                                                                                                                                                                                                                                       |
| Castelnuovo | 2010 | Clinical Practice & Epidemiology in Mental Health | Researcher | Metric | Single Researcher Impact Factor                         | IF                         | This metric takes into account publications (journal articles, books, oral and poster presentations in scientific meetings); products (e.g., software, CD-ROM, videos, databases); and activities (reported scientific activities such as scientific positions or positions in conferences organization, participation in journal editorial boards, activities on human resources education, and participation in international funding projects). Minimum and maximum values are assigned to each task for national and international impact.                                                                                                                                                                                                                    |
| Claro       | 2011 | Scientometrics                                    | Researcher | Metric | The x-index                                             | IF and author contribution | Aims to enable cross-disciplinary comparison and uses indicators of both quality and quantity, taking into account the number of publications a researcher has published, and then calculating a publication score for each. This considers number of authors on the paper and the journal's 5-year impact factor; it is also normalized by the journals in which the author tends to publish (rather than top-down classification of a field). Also uses a co-authorship share coefficient. Therefore, aims to determine relative contribution to a paper and normalize by field. While requiring only modest data extraction and processing efforts, it is not based on individual article citations but that of the journal (JIF), which can have limitations. |

|                   |      |                                                         |            |        |                                               |                           |                                                                                                                                                                                                                                                                                                                                                                                                                                                                                                                                                                                                                                                                                                              |   |    |    |    |    |    |    |    |    |    |    |    |    |    |    |    |    |    |    |    |    |    |    |    |    |    |    |    |    |    |    |    |    |    |    |    |    |    |    |
|-------------------|------|---------------------------------------------------------|------------|--------|-----------------------------------------------|---------------------------|--------------------------------------------------------------------------------------------------------------------------------------------------------------------------------------------------------------------------------------------------------------------------------------------------------------------------------------------------------------------------------------------------------------------------------------------------------------------------------------------------------------------------------------------------------------------------------------------------------------------------------------------------------------------------------------------------------------|---|----|----|----|----|----|----|----|----|----|----|----|----|----|----|----|----|----|----|----|----|----|----|----|----|----|----|----|----|----|----|----|----|----|----|----|----|----|----|
| 1                 | 2    | 3                                                       | 4          | 5      | 6                                             | 7                         | 8                                                                                                                                                                                                                                                                                                                                                                                                                                                                                                                                                                                                                                                                                                            | 9 | 10 | 11 | 12 | 13 | 14 | 15 | 16 | 17 | 18 | 19 | 20 | 21 | 22 | 23 | 24 | 25 | 26 | 27 | 28 | 29 | 30 | 31 | 32 | 33 | 34 | 35 | 36 | 37 | 38 | 39 | 40 | 41 | 42 | 43 | 44 | 45 | 46 | 47 |
| Cordero-Villafila | 2015 | Revista de Psiquiatría y Salud Mental (English Edition) | Both       | Metric | RC Algorithm                                  | IF                        | The first English-language publication of this metric, it quantitatively evaluates the personal impact factor of the scientific production of isolated researchers. It also an individual form (RC <sub>γ</sub> ) and group form (RC <sub>γ</sub> G), and is able to assess personal impact of individual publications, 2 or a group of them. It also provides a procedure to classify research centers of different types based on the impact (FRC <sub>γ</sub> G) made by their results amongst researchers of the same field. One of the limitations of the RC algorithm is, precisely, its dependence on said bibliographic databases, which have a strong pre-eminence of studies published in English. |   |    |    |    |    |    |    |    |    |    |    |    |    |    |    |    |    |    |    |    |    |    |    |    |    |    |    |    |    |    |    |    |    |    |    |    |    |    |    |
| Crespo            | 2015 | PLOS One                                                | Other      | Metric | Exchange Rate                                 | Citation count            | This is an average-based indicator that is used to explore differential citation rates between disciplines by using it as a normalization factor. It is not suitable for assessing individual researchers but provides insight into comparison across disciplines.                                                                                                                                                                                                                                                                                                                                                                                                                                           |   |    |    |    |    |    |    |    |    |    |    |    |    |    |    |    |    |    |    |    |    |    |    |    |    |    |    |    |    |    |    |    |    |    |    |    |    |    |    |
| De Witte          | 2010 | Scientometrics                                          | Researcher | Metric | RES-score - Research Evaluation Score         | Data Envelopment Analysis | Authors present a methodology to aggregate multidimensional research output, using a tailored version of the non-parametric Data Envelopment Analysis model. This they claim is a more accurate representation of a research performance.                                                                                                                                                                                                                                                                                                                                                                                                                                                                    |   |    |    |    |    |    |    |    |    |    |    |    |    |    |    |    |    |    |    |    |    |    |    |    |    |    |    |    |    |    |    |    |    |    |    |    |    |    |    |
| Delgadillo        | 2016 | Family & Consumer Sciences Research Journal             | Both       | Metric | HLA-index                                     | h-index                   | This index, actually originally published in a book by Harzing (2011), normalizes the h-index to take into account career stage and discipline.                                                                                                                                                                                                                                                                                                                                                                                                                                                                                                                                                              |   |    |    |    |    |    |    |    |    |    |    |    |    |    |    |    |    |    |    |    |    |    |    |    |    |    |    |    |    |    |    |    |    |    |    |    |    |    |    |
| Dodson            | 2012 | Biochemical and Biophysical Research Communications     | Researcher | Metric | SP-index                                      | IF                        | This metric is said to quantify the scientific production of researchers, representing the product of the annual citation number by the accumulated impact factors of the journals in which the papers are published, divided by the annual number of published papers.                                                                                                                                                                                                                                                                                                                                                                                                                                      |   |    |    |    |    |    |    |    |    |    |    |    |    |    |    |    |    |    |    |    |    |    |    |    |    |    |    |    |    |    |    |    |    |    |    |    |    |    |    |
| Duffy             | 2008 | Journal of Counseling Psychology                        | Both       | Metric | IRPI - Integrated Research Productivity Index | Citation count            | This metric statistically combines an individual's author-weighted publications (AWS), average times cited by other publications (MC), and years since first publication (Y) into a comprehensive score, calculated as (AWS x MC)/Y. It thereby accounts for differences in career length.                                                                                                                                                                                                                                                                                                                                                                                                                   |   |    |    |    |    |    |    |    |    |    |    |    |    |    |    |    |    |    |    |    |    |    |    |    |    |    |    |    |    |    |    |    |    |    |    |    |    |    |    |
| Ebadi             | 2016 | Scientometrics                                          | Researcher | Model  | iSEER                                         | Machine learning          | An intelligent machine learning framework for scientific evaluation of researchers (iSEER) considers various "influencing factors of different types" (e.g., funding, collaboration pattern, performance such as quantity and impact of papers, efficiency). It can be used as a complementary tool to overcome limitations in peer-review.                                                                                                                                                                                                                                                                                                                                                                  |   |    |    |    |    |    |    |    |    |    |    |    |    |    |    |    |    |    |    |    |    |    |    |    |    |    |    |    |    |    |    |    |    |    |    |    |    |    |    |

1  
2  
3  
4  
5  
6  
7  
8  
9  
10  
11  
12  
13  
14  
15  
16  
17  
18  
19  
20  
21  
22  
23  
24  
25  
26  
27  
28  
29  
30  
31  
32  
33  
34  
35  
36  
37  
38  
39  
40  
41  
42  
43  
44  
45  
46  
47

|              |      |                                                   |            |        |                           |                                                           |                                                                                                                                                                                                                                                                                                                                                                                                                                                                                                                                                                                                                                                                                                                                                                                                                                                                                      |
|--------------|------|---------------------------------------------------|------------|--------|---------------------------|-----------------------------------------------------------|--------------------------------------------------------------------------------------------------------------------------------------------------------------------------------------------------------------------------------------------------------------------------------------------------------------------------------------------------------------------------------------------------------------------------------------------------------------------------------------------------------------------------------------------------------------------------------------------------------------------------------------------------------------------------------------------------------------------------------------------------------------------------------------------------------------------------------------------------------------------------------------|
| Ekpo         | 2016 | Journal of Medical Imaging and Radiation Sciences | Researcher | Metric | TotalImpact               | Author contribution, publication count and citation count | For each of the authors, the total number of publications in peer-reviewed journals (P), total number of citations (C), international collaboration metrics, number of citations per publication (CPP), h-index, and i10-index are extracted (using SciVal). This metric assessed whether authors were leading the research or coauthoring by judging their position in the list of authors for each article. Authors listed as first, second, or last (FSL) were classified as lead researchers, and those listed in-between as coauthors. Each author's total impact was then quantified by: $TotalImpact = P \times C \times FSL$ .                                                                                                                                                                                                                                               |
| Franceschini | 2012 | Scientometrics                                    | Both       | Metric | Information not available | Citation counts and h-index                               | A study specific measurement that includes the number of publications/patents and their citations and also quantifies average number of co-authors relating to publications/patents of one researcher (an indicator of tendency for co-authorship). It also uses the minimum and maximum years: the oldest publication/patent and the year relating to their latest one. This provide an indication of the temporal extension of the publishing or patenting activity of a researcher. They also use the most-cited is publication/patent of a researcher, representing the "jewel in the crown" in terms of impact/diffusion. These metrics are also scalable to teams though, where the h-spectrum is h-values to a group of researchers (including average and medium), and the h-group is the h-index of the union of publications patents associated with publications/patents. |
| Franceschini | 2012 | Scientometrics                                    | Researcher | Metric | The Success-Index         | Citation counts, NSP-index by Komulski (2011)             | This metric is based on Komulski's (2011) NSP (number of successful papers) index, with the exception that for each publication the comparison term is sometimes replaced by a more appropriate indicator of propensity to cite, determined on the basis of a representative sample of publications. While it is more complicated than the original, it is insensitive to differential propensity to cite and therefore suitable for comparisons between authors of different fields.                                                                                                                                                                                                                                                                                                                                                                                                |

|    |           |      |                                                                               |            |        |                                                   |                                       |                                                                                                                                                                                                                                                                                                                                                                                                                                                                                                                                                                                       |
|----|-----------|------|-------------------------------------------------------------------------------|------------|--------|---------------------------------------------------|---------------------------------------|---------------------------------------------------------------------------------------------------------------------------------------------------------------------------------------------------------------------------------------------------------------------------------------------------------------------------------------------------------------------------------------------------------------------------------------------------------------------------------------------------------------------------------------------------------------------------------------|
| 1  |           |      |                                                                               |            |        |                                                   |                                       |                                                                                                                                                                                                                                                                                                                                                                                                                                                                                                                                                                                       |
| 2  |           |      |                                                                               |            |        |                                                   |                                       |                                                                                                                                                                                                                                                                                                                                                                                                                                                                                                                                                                                       |
| 3  |           |      |                                                                               |            |        |                                                   |                                       |                                                                                                                                                                                                                                                                                                                                                                                                                                                                                                                                                                                       |
| 4  |           |      |                                                                               |            |        |                                                   |                                       |                                                                                                                                                                                                                                                                                                                                                                                                                                                                                                                                                                                       |
| 5  | Frittelli | 2016 | Journal of the<br>Association for<br>Information<br>Science and<br>Technology | Researcher | Metric | SRM -<br>Scientific<br>Research<br>Measures       | h-index and<br>calculus               | Proposes a novel class of measures (SRM) based on calculus principles that rank a scientist's research performance by taking into account the whole citation curve of a researcher (their performance curve - number of citations of each publication, in decreasing order of citations). The performance curves can be chosen flexibly (e.g., to reflect seniority, characteristics of a field). They extend this idea by proposing Dual SRMs, which are based on theories of risk-measures. It better distinguishes researchers with the same citation curve.                       |
| 6  |           |      |                                                                               |            |        |                                                   |                                       |                                                                                                                                                                                                                                                                                                                                                                                                                                                                                                                                                                                       |
| 7  |           |      |                                                                               |            |        |                                                   |                                       |                                                                                                                                                                                                                                                                                                                                                                                                                                                                                                                                                                                       |
| 8  |           |      |                                                                               |            |        |                                                   |                                       |                                                                                                                                                                                                                                                                                                                                                                                                                                                                                                                                                                                       |
| 9  |           |      |                                                                               |            |        |                                                   |                                       |                                                                                                                                                                                                                                                                                                                                                                                                                                                                                                                                                                                       |
| 10 |           |      |                                                                               |            |        |                                                   |                                       |                                                                                                                                                                                                                                                                                                                                                                                                                                                                                                                                                                                       |
| 11 |           |      |                                                                               |            |        |                                                   |                                       |                                                                                                                                                                                                                                                                                                                                                                                                                                                                                                                                                                                       |
| 12 |           |      |                                                                               |            |        |                                                   |                                       |                                                                                                                                                                                                                                                                                                                                                                                                                                                                                                                                                                                       |
| 13 | Gao       | 2016 | PLOS One                                                                      | Both       | Metric | PR-index -<br>PageRank<br>Index                   | Network<br>analysis and<br>h-index    | This metric uses PageRank score calculation combined with h-index calculation to measure author impact. It considers publication and citation quantity but also takes a publication's citation network into consideration. This means the index will rank majority authors higher by applying PageRank based on the publication citation relationship (distinguishing higher quality citations from lower ones).                                                                                                                                                                      |
| 14 |           |      |                                                                               |            |        |                                                   |                                       |                                                                                                                                                                                                                                                                                                                                                                                                                                                                                                                                                                                       |
| 15 |           |      |                                                                               |            |        |                                                   |                                       |                                                                                                                                                                                                                                                                                                                                                                                                                                                                                                                                                                                       |
| 16 |           |      |                                                                               |            |        |                                                   |                                       |                                                                                                                                                                                                                                                                                                                                                                                                                                                                                                                                                                                       |
| 17 |           |      |                                                                               |            |        |                                                   |                                       |                                                                                                                                                                                                                                                                                                                                                                                                                                                                                                                                                                                       |
| 18 |           |      |                                                                               |            |        |                                                   |                                       |                                                                                                                                                                                                                                                                                                                                                                                                                                                                                                                                                                                       |
| 19 | Han       | 2013 | Institute of<br>Strategic Studies<br>Islamabad                                | Both       | Metric | New<br>Evaluation<br>Index                        | Network<br>analysis                   | The new evaluation index takes into account direct and indirect references, direct and indirect citations, and citation network.                                                                                                                                                                                                                                                                                                                                                                                                                                                      |
| 20 |           |      |                                                                               |            |        |                                                   |                                       |                                                                                                                                                                                                                                                                                                                                                                                                                                                                                                                                                                                       |
| 21 |           |      |                                                                               |            |        |                                                   |                                       |                                                                                                                                                                                                                                                                                                                                                                                                                                                                                                                                                                                       |
| 22 | Holliday  | 2010 | International<br>Journal of<br>General<br>Medicine                            | Article    | Model  | Modified<br>Delphi<br>technique of<br>peer-review | Peer-review                           | This paper reports using the modified Delphi process to appraise and rank research applications, with experts rating each application's scientific merit, originality, the adequacy of the study design to achieve the research goals, and whether the potential impact of the study would warrant its funding. While its ease of administration, reproducibility, and accessibility makes this a useful adjunct to the traditional processes of grant selection, it does not directly assess individual researcher's but their work.                                                 |
| 23 |           |      |                                                                               |            |        |                                                   |                                       |                                                                                                                                                                                                                                                                                                                                                                                                                                                                                                                                                                                       |
| 24 |           |      |                                                                               |            |        |                                                   |                                       |                                                                                                                                                                                                                                                                                                                                                                                                                                                                                                                                                                                       |
| 25 |           |      |                                                                               |            |        |                                                   |                                       |                                                                                                                                                                                                                                                                                                                                                                                                                                                                                                                                                                                       |
| 26 |           |      |                                                                               |            |        |                                                   |                                       |                                                                                                                                                                                                                                                                                                                                                                                                                                                                                                                                                                                       |
| 27 |           |      |                                                                               |            |        |                                                   |                                       |                                                                                                                                                                                                                                                                                                                                                                                                                                                                                                                                                                                       |
| 28 |           |      |                                                                               |            |        |                                                   |                                       |                                                                                                                                                                                                                                                                                                                                                                                                                                                                                                                                                                                       |
| 29 |           |      |                                                                               |            |        |                                                   |                                       |                                                                                                                                                                                                                                                                                                                                                                                                                                                                                                                                                                                       |
| 30 | Hutchins  | 2016 | PLOS Biology                                                                  | Both       | Metric | iCite                                             | Citation<br>count                     | This is used for individual articles and normalizes their citation score by adding in co-citation metrics.                                                                                                                                                                                                                                                                                                                                                                                                                                                                            |
| 31 |           |      |                                                                               |            |        |                                                   |                                       |                                                                                                                                                                                                                                                                                                                                                                                                                                                                                                                                                                                       |
| 32 | Ibrahim   | 2015 | New Library<br>World                                                          | Both       | Metric | Hx                                                | h-index and<br>author<br>contribution | This metric is a hybridization of two indicators based on the individual h-index (weighted by the average number of co-authors for each paper) and h-index contemporary weighted by qualitative factors (conferences and journal in which a researcher participated or published). It accounts for the period of citations and number of authors on a paper, is applicable at all levels and for any discipline of research, takes conferences into consideration, and is thought to reduce unscientific practices such as integration of authors who have not genuinely contributed. |
| 33 |           |      |                                                                               |            |        |                                                   |                                       |                                                                                                                                                                                                                                                                                                                                                                                                                                                                                                                                                                                       |
| 34 |           |      |                                                                               |            |        |                                                   |                                       |                                                                                                                                                                                                                                                                                                                                                                                                                                                                                                                                                                                       |
| 35 |           |      |                                                                               |            |        |                                                   |                                       |                                                                                                                                                                                                                                                                                                                                                                                                                                                                                                                                                                                       |
| 36 |           |      |                                                                               |            |        |                                                   |                                       |                                                                                                                                                                                                                                                                                                                                                                                                                                                                                                                                                                                       |
| 37 |           |      |                                                                               |            |        |                                                   |                                       |                                                                                                                                                                                                                                                                                                                                                                                                                                                                                                                                                                                       |
| 38 |           |      |                                                                               |            |        |                                                   |                                       |                                                                                                                                                                                                                                                                                                                                                                                                                                                                                                                                                                                       |
| 39 |           |      |                                                                               |            |        |                                                   |                                       |                                                                                                                                                                                                                                                                                                                                                                                                                                                                                                                                                                                       |
| 40 |           |      |                                                                               |            |        |                                                   |                                       |                                                                                                                                                                                                                                                                                                                                                                                                                                                                                                                                                                                       |
| 41 |           |      |                                                                               |            |        |                                                   |                                       |                                                                                                                                                                                                                                                                                                                                                                                                                                                                                                                                                                                       |
| 42 |           |      |                                                                               |            |        |                                                   |                                       |                                                                                                                                                                                                                                                                                                                                                                                                                                                                                                                                                                                       |
| 43 |           |      |                                                                               |            |        |                                                   |                                       |                                                                                                                                                                                                                                                                                                                                                                                                                                                                                                                                                                                       |
| 44 |           |      |                                                                               |            |        |                                                   |                                       |                                                                                                                                                                                                                                                                                                                                                                                                                                                                                                                                                                                       |
| 45 |           |      |                                                                               |            |        |                                                   |                                       |                                                                                                                                                                                                                                                                                                                                                                                                                                                                                                                                                                                       |
| 46 |           |      |                                                                               |            |        |                                                   |                                       |                                                                                                                                                                                                                                                                                                                                                                                                                                                                                                                                                                                       |
| 47 |           |      |                                                                               |            |        |                                                   |                                       |                                                                                                                                                                                                                                                                                                                                                                                                                                                                                                                                                                                       |

1  
2  
3  
4  
5  
6  
7  
8  
9  
10  
11  
12  
13  
14  
15  
16  
17  
18  
19  
20  
21  
22  
23  
24  
25  
26  
27  
28  
29  
30  
31  
32  
33  
34  
35  
36  
37  
38  
39  
40  
41  
42  
43  
44  
45  
46  
47

|           |      |                   |            |        |                                                    |                                                 |                                                                                                                                                                                                                                                                                                                                                                                                                                                                                                                                                                                                                                                                                                                                                                                                                                                                                                                                                                                                                                                                                                                                                                                                                  |
|-----------|------|-------------------|------------|--------|----------------------------------------------------|-------------------------------------------------|------------------------------------------------------------------------------------------------------------------------------------------------------------------------------------------------------------------------------------------------------------------------------------------------------------------------------------------------------------------------------------------------------------------------------------------------------------------------------------------------------------------------------------------------------------------------------------------------------------------------------------------------------------------------------------------------------------------------------------------------------------------------------------------------------------------------------------------------------------------------------------------------------------------------------------------------------------------------------------------------------------------------------------------------------------------------------------------------------------------------------------------------------------------------------------------------------------------|
| Ioannidis | 2016 | PLOS Biology      | Researcher | Metric | Composite                                          | Citation count, h-index and author contribution | A study-specific composite metric based: on total number of citations in, for example, 2013 (NC), total number of citations received in 2013 to papers for which the researcher is single author (NS), total number of citations received in 2013 to papers for which the author is single or first author (NSF), total number of citations received in 2013 to papers for which the researcher is single, first, or last author (NSFL). Added to these are the h-index and modified h-index. The indicators are standardized (NC, H, Hm, NS, NSF, NSFL), giving each a standardized value from 0 to 1, where 1 is given to the researcher with the highest raw value for the respective indicator. The six standardized indicators are then summed to generate the composite index C. Well-tested and validated using factor analysis, which yielded two factors: bulk impact (NC and H), author order and co-authorship-adjusted impact (Hm, NS, NSF, and NSFL).                                                                                                                                                                                                                                               |
| Iyendar   | 2009 | Academic Medicine | Researcher | Model  | RD - Research Density and Individual Impact Factor | IF                                              | RD measures the ability to obtain grants at a point in time, while IFF reflects the quality of research. The adopted methodology compares the impact factor of an investigator's articles with those of the top journals within their own field. Each investigator identified the top three journals in his or her field. The average impact factor of these three journals was used as the benchmark for that investigator. Each faculty member was then asked to calculate his or her own individual impact factor (IIF) for two consecutive years, using 75% of their benchmark as target. This benchmark was selected after reviewing results of comparisons of investigators' IIFs with their self-defined benchmarks at several multiples (50%, 75%, and 100%). We used 75% of the self-defined benchmark as the target, because it is unlikely for every paper to be published in the best journal in the field, and yet 75% reflects the reasonably high standard of the research quality that MSSM strives for. The data were collated and the IIF of each faculty member was computed as the ratio of his or her impact factor to 75% of his or her self-defined benchmark, expressed as a percentage. |
| Jeang     | 2008 | Retrovirology     | Researcher | Metric | Mentoring Index                                    | h-index                                         | Argues that good mentoring should be a significant consideration of one's contribution to science. It focuses on using the h-index of previous trainees in evaluating established researchers. It is thought this index could encourage the development of long-lasting mentoring relationships.                                                                                                                                                                                                                                                                                                                                                                                                                                                                                                                                                                                                                                                                                                                                                                                                                                                                                                                 |

|          |      |                                                                  |         |        |                           |                              |                                                                                                                                                                                                                                                                                                                                                                                                                                                                                                                                                                                                                                                                                                                                                                                                                                                                                                                                                        |
|----------|------|------------------------------------------------------------------|---------|--------|---------------------------|------------------------------|--------------------------------------------------------------------------------------------------------------------------------------------------------------------------------------------------------------------------------------------------------------------------------------------------------------------------------------------------------------------------------------------------------------------------------------------------------------------------------------------------------------------------------------------------------------------------------------------------------------------------------------------------------------------------------------------------------------------------------------------------------------------------------------------------------------------------------------------------------------------------------------------------------------------------------------------------------|
| Krapivin | 2009 | Complex Sciences                                                 | Both    | Metric | PaperRank and PR-hirsch   | Network analysis and h-index | Based on PageRank, which has been very successful in ranking web pages, essentially considering the reputation of the web page referring to a given page, and the outgoing link density (i.e., pages P linked by pages L where L has few outgoing links are considered more important than pages P cited by pages L where L has many outgoing links). PaperRank (PR) applies page rank to papers by considering papers as web pages and citations as links, and hence trying to consider not only citations when ranking papers, but also taking into account the rank of the citing paper and the density of outgoing citations from the citing paper. The PR-Hirsch is a modification of the H-index based on the same PageRank approach. PR and PR-Hirsch are complementary to citation-based metrics, capable of capturing information present in the whole citation network, namely the “weight” (the reputation or authority) of a citing paper. |
| Kreines  | 2016 | Journal of Computer and Systems Sciences International           | Article | Model  | Information not available | Citation count and IF        | Proposes a model for assessing quality in the content of individual articles using computational analysis with bibliometric and scientometric data (number of citations and the journal's IF).                                                                                                                                                                                                                                                                                                                                                                                                                                                                                                                                                                                                                                                                                                                                                         |
| Lando    | 2014 | PLOS One                                                         | Article | Metric | $l$ -index                | h-index                      | This index considers the most elite papers and rewards papers of high impact and based on the form of the citation distribution. It is thought to outperform the h-index in terms of accuracy and sensitivity to the form of the citation distribution, while being strongly correlated with other important h-type indices. It rewards the more regular and reliable researchers.                                                                                                                                                                                                                                                                                                                                                                                                                                                                                                                                                                     |
| Liang    | 2015 | IEEE International Conference on Smart City/SocialCom/SustainCom | Both    | Model  | Temporal tracking model   |                              | The temporal research evolution model takes into account individual output, researcher profile and experiences                                                                                                                                                                                                                                                                                                                                                                                                                                                                                                                                                                                                                                                                                                                                                                                                                                         |



1  
2  
3  
4  
5  
6  
7  
8  
9  
10  
11  
12  
13  
14  
15  
16  
17  
18  
19  
20  
21  
22  
23  
24  
25  
26  
27  
28  
29  
30  
31  
32  
33  
34  
35  
36  
37  
38  
39  
40  
41  
42  
43  
44  
45  
46  
47

|            |      |                                    |            |        |                                    |                |                                                                                                                                                                                                                                                                                                                                                                                                                                                                                                                                                                                                                                                                                                                                                                                         |
|------------|------|------------------------------------|------------|--------|------------------------------------|----------------|-----------------------------------------------------------------------------------------------------------------------------------------------------------------------------------------------------------------------------------------------------------------------------------------------------------------------------------------------------------------------------------------------------------------------------------------------------------------------------------------------------------------------------------------------------------------------------------------------------------------------------------------------------------------------------------------------------------------------------------------------------------------------------------------|
| Lippi      | 2017 | Annals of Translational Medicine   | Researcher | Metric | SIF-Scientist Impact Factor        | IF             | This metric is calculated as all citations of articles published in the two years following the publication year of the articles, divided by the overall number of articles published in that year. For example, the SIF for the year 2017 would be obtained by dividing all citations in the years 2015–2016 to articles published in the year 2014, divided by the overall number of articles published in the year 2014. The total number of recent citations is normalized according to the number of recently published articles, limiting the bias emerging from publishing a large number of scarcely cited articles; and the output measure reliably reflects the recent scientific impact of the scientist, so complementing an overall career indicator, such as the h-index. |
| Markpin    | 2008 | Scientometrics                     | Other      | Metric | ACIF - Article-Count Impact Factor | IF             | This is proposed as a journal-level metric that is calculated as the total number of articles cited in the current year divided by the number of articles published in 1st and 2nd year. Note that is based on the number of articles that were cited, rather than the times cited of the cited articles. However, it could be used for individual researchers.                                                                                                                                                                                                                                                                                                                                                                                                                         |
| Matsas     | 2012 | Brazilian Journal of Physics       | Both       | Metric | NIF - Normalized Impact Factor     | IF             | Introduces a normalized impact factor that looks at the researchers influence on their scientific community by assessing the degree to which they have been influenced by their community. Looks each of an author's publications, the number of co-authors, references in the article and citations it has received. From the way it is calculated: "in a closed community of identical individuals (i.e., who publish, reference and are cited by each other at the same rate), all members have NIF = 1." Leaders in a field are then those with a NIF greater than or equal to 1 i.e., they influence their peers at least as much as they are influenced by them.                                                                                                                  |
| Maunder    | 2007 | La Revue Canadienne de Psychiatrie | Article    | Metric | Citation Ratio                     | Citation count | This metric is designed to overcome systematic differences amongst niche fields by comparing the impact of a particular paper to the average impact of a paper in its journal. A ratio above 1 indicates relatively greater success.                                                                                                                                                                                                                                                                                                                                                                                                                                                                                                                                                    |
| Mazlounian | 2011 | PLOS One                           | Article    | Metric | Boost Factor                       | Citation count | This metric calculates when a particular research gains scientific authority, that is, they publish some groundbreaking work that then leads to an upswing in citations of their earlier papers. It is able to model the trend of the "rich get richer", a cascade of citations and is too improve the "signal-to-noise" ratio in citation rates by detecting sudden changes in citations.                                                                                                                                                                                                                                                                                                                                                                                              |

|    |                     |      |                                            |            |        |                                               |                                         |                                                                                                                                                                                                                                                                                                                                                                                                                                                                                                                                                                |
|----|---------------------|------|--------------------------------------------|------------|--------|-----------------------------------------------|-----------------------------------------|----------------------------------------------------------------------------------------------------------------------------------------------------------------------------------------------------------------------------------------------------------------------------------------------------------------------------------------------------------------------------------------------------------------------------------------------------------------------------------------------------------------------------------------------------------------|
| 1  |                     |      |                                            |            |        |                                               |                                         |                                                                                                                                                                                                                                                                                                                                                                                                                                                                                                                                                                |
| 2  |                     |      |                                            |            |        |                                               |                                         |                                                                                                                                                                                                                                                                                                                                                                                                                                                                                                                                                                |
| 3  |                     |      |                                            |            |        |                                               |                                         |                                                                                                                                                                                                                                                                                                                                                                                                                                                                                                                                                                |
| 4  |                     |      |                                            |            |        |                                               |                                         |                                                                                                                                                                                                                                                                                                                                                                                                                                                                                                                                                                |
| 5  | Milone              | 2016 | American Journal of Orthopedics            | Article    | Metric | Information not available                     | Publication count                       | A study specific measurement simply calculated by taking the mean of first and last authored publications.                                                                                                                                                                                                                                                                                                                                                                                                                                                     |
| 6  |                     |      |                                            |            |        |                                               |                                         |                                                                                                                                                                                                                                                                                                                                                                                                                                                                                                                                                                |
| 7  |                     |      |                                            |            |        |                                               |                                         |                                                                                                                                                                                                                                                                                                                                                                                                                                                                                                                                                                |
| 8  | Mooji               | 2014 | Scientometrics                             | Both       | Model  | Information not available                     | Peer-review, altmetrics, citation count | This paper proposes a comprehensive and new framework for assessing research quality assessment which utilizes intrinsic (i.e., the internal quality of a publication) and extrinsic indicators (i.e., citation counts, web-based influence). It uses peer-review ratings for the former and bibliometric and altmetric data at the individual article and author levels for the latter. One limit includes that the assessment of extrinsic factors is still biased in terms of multi-author papers. This framework builds in a quality check on peer-review. |
| 9  |                     |      |                                            |            |        |                                               |                                         |                                                                                                                                                                                                                                                                                                                                                                                                                                                                                                                                                                |
| 10 |                     |      |                                            |            |        |                                               |                                         |                                                                                                                                                                                                                                                                                                                                                                                                                                                                                                                                                                |
| 11 |                     |      |                                            |            |        |                                               |                                         |                                                                                                                                                                                                                                                                                                                                                                                                                                                                                                                                                                |
| 12 |                     |      |                                            |            |        |                                               |                                         |                                                                                                                                                                                                                                                                                                                                                                                                                                                                                                                                                                |
| 13 |                     |      |                                            |            |        |                                               |                                         |                                                                                                                                                                                                                                                                                                                                                                                                                                                                                                                                                                |
| 14 |                     |      |                                            |            |        |                                               |                                         |                                                                                                                                                                                                                                                                                                                                                                                                                                                                                                                                                                |
| 15 |                     |      |                                            |            |        |                                               |                                         |                                                                                                                                                                                                                                                                                                                                                                                                                                                                                                                                                                |
| 16 | Moreira             | 2015 | PLOS One                                   | Researcher | Metric | $\mu$                                         | Information not available               | Suggests accumulated citations from an author's aggregated publications follow an asymptotic number, and then use a lognormal model. Creates $\mu$ as a scale of expected citability of a researcher's publication. It is able to be used at all career stages and indicates more of quality over quantity.                                                                                                                                                                                                                                                    |
| 17 |                     |      |                                            |            |        |                                               |                                         |                                                                                                                                                                                                                                                                                                                                                                                                                                                                                                                                                                |
| 18 |                     |      |                                            |            |        |                                               |                                         |                                                                                                                                                                                                                                                                                                                                                                                                                                                                                                                                                                |
| 19 |                     |      |                                            |            |        |                                               |                                         |                                                                                                                                                                                                                                                                                                                                                                                                                                                                                                                                                                |
| 20 |                     |      |                                            |            |        |                                               |                                         |                                                                                                                                                                                                                                                                                                                                                                                                                                                                                                                                                                |
| 21 | Morel               | 2009 | PLOS Neglected Tropic Diseases             | Researcher | Metric | Information not available                     | Network Analysis                        | Co-citation networks generated using SNA of publications, to identify groups and individuals with high collaboration rates.                                                                                                                                                                                                                                                                                                                                                                                                                                    |
| 22 |                     |      |                                            |            |        |                                               |                                         |                                                                                                                                                                                                                                                                                                                                                                                                                                                                                                                                                                |
| 23 | Niederkröten thaler | 2011 | BMC Public Health                          | Article    | Model  | Information not available                     | Information not available               | A tool designed to measure the societal impact of research publications. It consists of three quantitative dimensions: (1) the aim of a publication, (2) the efforts of the authors to translate their research results, and, if translation was accomplished, (3) (a) the size of the area where translation was accomplished (regional, national or international), (b) its status (preliminary versus permanent) and (c) the target group of the translation (individuals, subgroup of population, total population).                                       |
| 24 |                     |      |                                            |            |        |                                               |                                         |                                                                                                                                                                                                                                                                                                                                                                                                                                                                                                                                                                |
| 25 |                     |      |                                            |            |        |                                               |                                         |                                                                                                                                                                                                                                                                                                                                                                                                                                                                                                                                                                |
| 26 |                     |      |                                            |            |        |                                               |                                         |                                                                                                                                                                                                                                                                                                                                                                                                                                                                                                                                                                |
| 27 |                     |      |                                            |            |        |                                               |                                         |                                                                                                                                                                                                                                                                                                                                                                                                                                                                                                                                                                |
| 28 |                     |      |                                            |            |        |                                               |                                         |                                                                                                                                                                                                                                                                                                                                                                                                                                                                                                                                                                |
| 29 |                     |      |                                            |            |        |                                               |                                         |                                                                                                                                                                                                                                                                                                                                                                                                                                                                                                                                                                |
| 30 | Nosek               | 2010 | Personality and Social Psychology Bulletin | Researcher | Metric | Ics-Individual researcher career-stage impact | Citation count                          | Produces career-stage metric of scientific impact based on citation counts. Its development was based on extensive data collection to produce a regression of expected growth of impact over time. It, therefore, reflects the distance from one's expected impact at a given career stage.                                                                                                                                                                                                                                                                    |
| 31 |                     |      |                                            |            |        |                                               |                                         |                                                                                                                                                                                                                                                                                                                                                                                                                                                                                                                                                                |
| 32 |                     |      |                                            |            |        |                                               |                                         |                                                                                                                                                                                                                                                                                                                                                                                                                                                                                                                                                                |
| 33 |                     |      |                                            |            |        |                                               |                                         |                                                                                                                                                                                                                                                                                                                                                                                                                                                                                                                                                                |
| 34 |                     |      |                                            |            |        |                                               |                                         |                                                                                                                                                                                                                                                                                                                                                                                                                                                                                                                                                                |
| 35 | Pagani              | 2015 | Scientometrics                             | Article    | Metric | Methodi Ordinatio                             | IF                                      | Based on IF, number of citations and year of publication in a normalized, weighted mathematical equation. It is a potential way to define scientific relevance.                                                                                                                                                                                                                                                                                                                                                                                                |
| 36 |                     |      |                                            |            |        |                                               |                                         |                                                                                                                                                                                                                                                                                                                                                                                                                                                                                                                                                                |
| 37 |                     |      |                                            |            |        |                                               |                                         |                                                                                                                                                                                                                                                                                                                                                                                                                                                                                                                                                                |
| 38 |                     |      |                                            |            |        |                                               |                                         |                                                                                                                                                                                                                                                                                                                                                                                                                                                                                                                                                                |
| 39 |                     |      |                                            |            |        |                                               |                                         |                                                                                                                                                                                                                                                                                                                                                                                                                                                                                                                                                                |
| 40 |                     |      |                                            |            |        |                                               |                                         |                                                                                                                                                                                                                                                                                                                                                                                                                                                                                                                                                                |
| 41 |                     |      |                                            |            |        |                                               |                                         |                                                                                                                                                                                                                                                                                                                                                                                                                                                                                                                                                                |
| 42 |                     |      |                                            |            |        |                                               |                                         |                                                                                                                                                                                                                                                                                                                                                                                                                                                                                                                                                                |
| 43 |                     |      |                                            |            |        |                                               |                                         |                                                                                                                                                                                                                                                                                                                                                                                                                                                                                                                                                                |
| 44 |                     |      |                                            |            |        |                                               |                                         |                                                                                                                                                                                                                                                                                                                                                                                                                                                                                                                                                                |
| 45 |                     |      |                                            |            |        |                                               |                                         |                                                                                                                                                                                                                                                                                                                                                                                                                                                                                                                                                                |
| 46 |                     |      |                                            |            |        |                                               |                                         |                                                                                                                                                                                                                                                                                                                                                                                                                                                                                                                                                                |
| 47 |                     |      |                                            |            |        |                                               |                                         |                                                                                                                                                                                                                                                                                                                                                                                                                                                                                                                                                                |

|    |          |      |                                                                                 |            |        |                                                  |                |                                                                                                                                                                                                                                                                                                                                                                                                                                                     |
|----|----------|------|---------------------------------------------------------------------------------|------------|--------|--------------------------------------------------|----------------|-----------------------------------------------------------------------------------------------------------------------------------------------------------------------------------------------------------------------------------------------------------------------------------------------------------------------------------------------------------------------------------------------------------------------------------------------------|
| 1  |          |      |                                                                                 |            |        |                                                  |                |                                                                                                                                                                                                                                                                                                                                                                                                                                                     |
| 2  |          |      |                                                                                 |            |        |                                                  |                |                                                                                                                                                                                                                                                                                                                                                                                                                                                     |
| 3  |          |      |                                                                                 |            |        |                                                  |                |                                                                                                                                                                                                                                                                                                                                                                                                                                                     |
| 4  |          |      |                                                                                 |            |        |                                                  |                |                                                                                                                                                                                                                                                                                                                                                                                                                                                     |
| 5  | Pan      | 2014 | Science Reports                                                                 | Researcher | Metric | Author Impact Factor (AIF)                       |                | Defined as the AIF of an author A in year t is the average number of citations given by papers published in year t to papers published by A in a period of $\Delta t$ years before year t. Uses a time window of years for calculation.                                                                                                                                                                                                             |
| 6  |          |      |                                                                                 |            |        |                                                  |                |                                                                                                                                                                                                                                                                                                                                                                                                                                                     |
| 7  |          |      |                                                                                 |            |        |                                                  |                |                                                                                                                                                                                                                                                                                                                                                                                                                                                     |
| 8  |          |      |                                                                                 |            |        |                                                  |                |                                                                                                                                                                                                                                                                                                                                                                                                                                                     |
| 9  | Patel    | 2013 | Journal of the Royal Society of Medicine                                        | Researcher | Model  | sRM - statistical Regression Model               | Citation count | Used to estimate the number of high visibility (based on citation count) publications of each researcher.                                                                                                                                                                                                                                                                                                                                           |
| 10 |          |      |                                                                                 |            |        |                                                  |                |                                                                                                                                                                                                                                                                                                                                                                                                                                                     |
| 11 |          |      |                                                                                 |            |        |                                                  |                |                                                                                                                                                                                                                                                                                                                                                                                                                                                     |
| 12 |          |      |                                                                                 |            |        |                                                  |                |                                                                                                                                                                                                                                                                                                                                                                                                                                                     |
| 13 | Pepe     | 2012 | PLOS One                                                                        | Researcher | Metric | TORI - Total Research Impact                     | Citation count | Includes non-self-citations accrued by the researcher, number of authors on cited paper, and number of bibliographic references to generate the cumulative output of a scholar by summing the impact of every external citation accrued in his/her career. This removes biases associated with citation counts.                                                                                                                                     |
| 14 |          |      |                                                                                 |            |        |                                                  |                |                                                                                                                                                                                                                                                                                                                                                                                                                                                     |
| 15 |          |      |                                                                                 |            |        |                                                  |                |                                                                                                                                                                                                                                                                                                                                                                                                                                                     |
| 16 |          |      |                                                                                 |            |        |                                                  |                |                                                                                                                                                                                                                                                                                                                                                                                                                                                     |
| 17 | Petersen | 2013 | Journal of Informetrics                                                         | Researcher | Metric | Z                                                | h-index        | Z is aimed at correcting the h-index's penalty (which in some cases neglects 75% of an author's body of work) by including the total number of citations for their work in the metric.                                                                                                                                                                                                                                                              |
| 18 |          |      |                                                                                 |            |        |                                                  |                |                                                                                                                                                                                                                                                                                                                                                                                                                                                     |
| 19 |          |      |                                                                                 |            |        |                                                  |                |                                                                                                                                                                                                                                                                                                                                                                                                                                                     |
| 20 | Pöder    | 2017 | Trames-Journal of the Humanities and Social Sciences                            | Researcher | Metric | (Current or predicted) impact rate of researcher | Citation count | Based on the citations per year squared, this metric provides a means of assessing acceleration/impact and is based on time series data. This is more sensitive to productivity overtime and can go down unlike the h-index.                                                                                                                                                                                                                        |
| 21 |          |      |                                                                                 |            |        |                                                  |                |                                                                                                                                                                                                                                                                                                                                                                                                                                                     |
| 22 |          |      |                                                                                 |            |        |                                                  |                |                                                                                                                                                                                                                                                                                                                                                                                                                                                     |
| 23 |          |      |                                                                                 |            |        |                                                  |                |                                                                                                                                                                                                                                                                                                                                                                                                                                                     |
| 24 | Prathap  | 2014 | Scientometrics                                                                  | Researcher | Metric | Z-index                                          | h-index        | Purporting to include quality, quantity and consistency, it accounts for the high-end of research performance, while compensating for the skewness of citation-publication distributions.                                                                                                                                                                                                                                                           |
| 25 |          |      |                                                                                 |            |        |                                                  |                |                                                                                                                                                                                                                                                                                                                                                                                                                                                     |
| 26 |          |      |                                                                                 |            |        |                                                  |                |                                                                                                                                                                                                                                                                                                                                                                                                                                                     |
| 27 | Radicchi | 2008 | Proceedings of the National Academy of Sciences of the United States of America | Article    | Metric | Relative Indicator - cf                          | Citation count | The relative indicator is used to deal with the fact that different fields have different citation patterns and allows for comparisons of the success of articles in different fields.                                                                                                                                                                                                                                                              |
| 28 |          |      |                                                                                 |            |        |                                                  |                |                                                                                                                                                                                                                                                                                                                                                                                                                                                     |
| 29 |          |      |                                                                                 |            |        |                                                  |                |                                                                                                                                                                                                                                                                                                                                                                                                                                                     |
| 30 |          |      |                                                                                 |            |        |                                                  |                |                                                                                                                                                                                                                                                                                                                                                                                                                                                     |
| 31 |          |      |                                                                                 |            |        |                                                  |                |                                                                                                                                                                                                                                                                                                                                                                                                                                                     |
| 32 | Ribas    | 2015 | Proceedings of the 24th International Conference on World Wide Web              | Both       | Metric | P-score                                          | Citation count | It associates a reputation with publication venues based on the publication patterns of reference groups, composed by researchers, in a given area of knowledge. Although the choice of reference groups can be made by using available citation data, the P-score metric itself does not depend on citation data. It uses just publication records of researchers and research groups; that is, the papers and the venues where they published in. |
| 33 |          |      |                                                                                 |            |        |                                                  |                |                                                                                                                                                                                                                                                                                                                                                                                                                                                     |
| 34 |          |      |                                                                                 |            |        |                                                  |                |                                                                                                                                                                                                                                                                                                                                                                                                                                                     |
| 35 |          |      |                                                                                 |            |        |                                                  |                |                                                                                                                                                                                                                                                                                                                                                                                                                                                     |
| 36 |          |      |                                                                                 |            |        |                                                  |                |                                                                                                                                                                                                                                                                                                                                                                                                                                                     |
| 37 |          |      |                                                                                 |            |        |                                                  |                |                                                                                                                                                                                                                                                                                                                                                                                                                                                     |
| 38 |          |      |                                                                                 |            |        |                                                  |                |                                                                                                                                                                                                                                                                                                                                                                                                                                                     |
| 39 |          |      |                                                                                 |            |        |                                                  |                |                                                                                                                                                                                                                                                                                                                                                                                                                                                     |
| 40 |          |      |                                                                                 |            |        |                                                  |                |                                                                                                                                                                                                                                                                                                                                                                                                                                                     |
| 41 |          |      |                                                                                 |            |        |                                                  |                |                                                                                                                                                                                                                                                                                                                                                                                                                                                     |
| 42 |          |      |                                                                                 |            |        |                                                  |                |                                                                                                                                                                                                                                                                                                                                                                                                                                                     |
| 43 |          |      |                                                                                 |            |        |                                                  |                |                                                                                                                                                                                                                                                                                                                                                                                                                                                     |
| 44 |          |      |                                                                                 |            |        |                                                  |                |                                                                                                                                                                                                                                                                                                                                                                                                                                                     |
| 45 |          |      |                                                                                 |            |        |                                                  |                |                                                                                                                                                                                                                                                                                                                                                                                                                                                     |
| 46 |          |      |                                                                                 |            |        |                                                  |                |                                                                                                                                                                                                                                                                                                                                                                                                                                                     |
| 47 |          |      |                                                                                 |            |        |                                                  |                |                                                                                                                                                                                                                                                                                                                                                                                                                                                     |

|           |      |                                              |            |        |                                                        |                              |                                                                                                                                                                                                                                                                                       |
|-----------|------|----------------------------------------------|------------|--------|--------------------------------------------------------|------------------------------|---------------------------------------------------------------------------------------------------------------------------------------------------------------------------------------------------------------------------------------------------------------------------------------|
| Ricker    | 2009 | Interciencia                                 | Researcher | Model  | Rule-based peer-review                                 | Peer-review                  | Computer generated peer-review, which is positive as researchers get peer-review feedback. Can also measure evaluators select certain criteria of interest, important journals of interest based on field.                                                                            |
| Ruane     | 2009 | Scientometrics                               | Both       | Metric | h1-index                                               | h-index                      | A measure of supervision quality, it gives the supervisor h1 index calculated by the h-indexes of their PhD students.                                                                                                                                                                 |
| Sahoo     | 2017 | Omega                                        | Researcher | Model  | Composite indicator                                    | h-index, IF, citation counts | Calculated based on the relative weight of the six indicators of journal tier, total citations, author h-index, number of papers, impact factor, and journal h-index.                                                                                                                 |
| Saxena    | 2013 | Journal of Pharmacology Pharmacotherapeutics | Researcher | Metric | ORPI - Original Research Publication Index             | Citation count               | Indicates originality, productivity, and visibility, by including total number of original articles, citations, accounting for self-citations, and the total number of citable articles (i.e., including reviews and case reports). Also accounts for author order and career length. |
| Sibbald   | 2015 | Journal of the Medical Library Association   | Both       | Model  | Modified approach to citation analysis                 | Citation count               | Includes grey literature in the citation analysis search process and involves quantitative and qualitative methods of analysis to gain a better understanding of how a research paper was used. However, this is more expensive and time consuming than traditional metrics.          |
| Sittig    | 2015 | MEDINFO 2015: eHealth-enabled Health         | Researcher | Model  | The Biomedical Informatics Researchers ranking website | Information not available    | This new system was developed to overcome previous scientific productivity ranking strategies. However, it is limited to biomedical informatics.                                                                                                                                      |
| Sorenson  | 2011 | Journal of Parkinson's Disease               | Both       | Metric | "Broad impact" citations                               | Citation count               | Citations from those outside the field are used as a measure of broader impact.                                                                                                                                                                                                       |
| Surla     | 2017 | The Electronic Library                       | Researcher | Metric | Research Impact Factor                                 | IF                           | Allows a measure of scientific influence of a researcher in their relative scientific area.                                                                                                                                                                                           |
| Szymanski | 2012 | Information Sciences                         | Both       | Metric | CENTs - sScientific currENcy Tokens and the I-index    | Citation count and h-index   | An accumulation of "cents" based on the number of non-self-citations. This is also the premise behind the i-index, whereby papers are ranked according to CENTs rather than just all citations.                                                                                       |

|    |             |      |                                    |            |        |                                           |                                        |                                                                                                                                                                                                                                                                                      |
|----|-------------|------|------------------------------------|------------|--------|-------------------------------------------|----------------------------------------|--------------------------------------------------------------------------------------------------------------------------------------------------------------------------------------------------------------------------------------------------------------------------------------|
| 1  |             |      |                                    |            |        |                                           |                                        |                                                                                                                                                                                                                                                                                      |
| 2  |             |      |                                    |            |        |                                           |                                        |                                                                                                                                                                                                                                                                                      |
| 3  |             |      |                                    |            |        |                                           |                                        |                                                                                                                                                                                                                                                                                      |
| 4  |             |      |                                    |            |        |                                           |                                        |                                                                                                                                                                                                                                                                                      |
| 5  | Tan         | 2016 | The Annals of Applied Statistics   | Article    | Model  | Information not available                 | Citation count                         | Proposes to use two established models in the creation of a third. The proposed model provides a structural understanding of the field variation in citation behavior and a measure of visibility for individual articles adjusted for citation probabilities within/between topics. |
| 6  |             |      |                                    |            |        |                                           |                                        |                                                                                                                                                                                                                                                                                      |
| 7  |             |      |                                    |            |        |                                           |                                        |                                                                                                                                                                                                                                                                                      |
| 8  |             |      |                                    |            |        |                                           |                                        |                                                                                                                                                                                                                                                                                      |
| 9  | Vieira      | 2011 | Scientometrics                     | Researcher | Metric | hnf-index                                 | h-index                                | Considers the different cultures of citation of each field and the number of authors per publication, and hence can be used to measure researcher performance.                                                                                                                       |
| 10 |             |      |                                    |            |        |                                           |                                        |                                                                                                                                                                                                                                                                                      |
| 11 |             |      |                                    |            |        |                                           |                                        |                                                                                                                                                                                                                                                                                      |
| 12 | Wagner      | 2012 | Research Evaluation                | Researcher | Metric | I3 - Integrated impact indicator          | Citation count                         | A framework for integrating citations and non-parametric statistics of percentiles, which allow highly cited papers to be weighted more than less-cited ones.                                                                                                                        |
| 13 |             |      |                                    |            |        |                                           |                                        |                                                                                                                                                                                                                                                                                      |
| 14 |             |      |                                    |            |        |                                           |                                        |                                                                                                                                                                                                                                                                                      |
| 15 |             |      |                                    |            |        |                                           |                                        |                                                                                                                                                                                                                                                                                      |
| 16 | Waltman     | 2013 |                                    | Article    | Metric | HCP – Highly cited publications index     | Citation count                         | A simple model in which the number of citations of a publication depends not only on the scientific impact of the publication but also on other ‘random’ factors. Does not account for productivity.                                                                                 |
| 17 |             |      |                                    |            |        |                                           |                                        |                                                                                                                                                                                                                                                                                      |
| 18 |             |      |                                    |            |        |                                           |                                        |                                                                                                                                                                                                                                                                                      |
| 19 |             |      |                                    |            |        |                                           |                                        |                                                                                                                                                                                                                                                                                      |
| 20 | Wang        | 2013 | Science                            | Article    | Model  | Mechanistic model for citation dynamics   | Citation count                         | Authors demonstrate a predictable course for citations of single articles over time, purporting, therefore, to create more reliable predictive index of individual impact.                                                                                                           |
| 21 |             |      |                                    |            |        |                                           |                                        |                                                                                                                                                                                                                                                                                      |
| 22 |             |      |                                    |            |        |                                           |                                        |                                                                                                                                                                                                                                                                                      |
| 23 |             |      |                                    |            |        |                                           |                                        |                                                                                                                                                                                                                                                                                      |
| 24 | Williamson  | 2008 | Family Medicine                    | Researcher | Metric | Information not available                 | Too broad to classify                  | Quantifies activities within three domains: teaching, service and research and scholarly activity. A time intensive- process that is suitable for promotion within institutions, but not grant funding or more macro-scale assessments.                                              |
| 25 |             |      |                                    |            |        |                                           |                                        |                                                                                                                                                                                                                                                                                      |
| 26 |             |      |                                    |            |        |                                           |                                        |                                                                                                                                                                                                                                                                                      |
| 27 | Wootton     | 2013 | Health Research Policy and Systems | Researcher | Metric | R - Simple indicator of researcher output |                                        | Formula is $R=g+p+s$ and comprises grant income (g), publications (peer-reviewed and weighted by JIF; p) and numbers of PhD students supervised (no credit for submission after the due date of submission; s).                                                                      |
| 28 |             |      |                                    |            |        |                                           |                                        |                                                                                                                                                                                                                                                                                      |
| 29 |             |      |                                    |            |        |                                           |                                        |                                                                                                                                                                                                                                                                                      |
| 30 |             |      |                                    |            |        |                                           |                                        |                                                                                                                                                                                                                                                                                      |
| 31 | Yaminfirooz | 2015 | The Electronic Library             | Both       | Metric | mh-index                                  | h-index                                | Use to identify differences in the impact of authors with the same h-index, and differences between the outputs of influential researchers working in a certain field and the ones publishing only a few papers during a year, can track the impact of highly cited papers.          |
| 32 |             |      |                                    |            |        |                                           |                                        |                                                                                                                                                                                                                                                                                      |
| 33 |             |      |                                    |            |        |                                           |                                        |                                                                                                                                                                                                                                                                                      |
| 34 |             |      |                                    |            |        |                                           |                                        |                                                                                                                                                                                                                                                                                      |
| 35 |             |      |                                    |            |        |                                           |                                        |                                                                                                                                                                                                                                                                                      |
| 36 | Yang        | 2013 | Journal of Informetrics            | Researcher | Metric | A-index - Axiomatic approach              | Citation count and author contribution | Allows for evaluation of individual researcher in the team context (i.e., co-authorship networks).                                                                                                                                                                                   |
| 37 |             |      |                                    |            |        |                                           |                                        |                                                                                                                                                                                                                                                                                      |
| 38 |             |      |                                    |            |        |                                           |                                        |                                                                                                                                                                                                                                                                                      |
| 39 |             |      |                                    |            |        |                                           |                                        |                                                                                                                                                                                                                                                                                      |
| 40 |             |      |                                    |            |        |                                           |                                        |                                                                                                                                                                                                                                                                                      |
| 41 |             |      |                                    |            |        |                                           |                                        |                                                                                                                                                                                                                                                                                      |
| 42 |             |      |                                    |            |        |                                           |                                        |                                                                                                                                                                                                                                                                                      |
| 43 |             |      |                                    |            |        |                                           |                                        |                                                                                                                                                                                                                                                                                      |
| 44 |             |      |                                    |            |        |                                           |                                        |                                                                                                                                                                                                                                                                                      |
| 45 |             |      |                                    |            |        |                                           |                                        |                                                                                                                                                                                                                                                                                      |
| 46 |             |      |                                    |            |        |                                           |                                        |                                                                                                                                                                                                                                                                                      |
| 47 |             |      |                                    |            |        |                                           |                                        |                                                                                                                                                                                                                                                                                      |

|            |      |                        |            |        |                                          |                           |                                                                                                                                                                                                                           |
|------------|------|------------------------|------------|--------|------------------------------------------|---------------------------|---------------------------------------------------------------------------------------------------------------------------------------------------------------------------------------------------------------------------|
| Zhang      | 2012 | Scientometrics         | Both       | Model  | Scientometric age pyramid                | Information not available | Accounts for the different ages of academics, different fields, co-authorship patterns and analysis of journals. The pyramid represents the number of publications on one side and number of citations on the other side. |
| Zhou       | 2012 | New Journal of Physics | Both       | Metric | AP Algorithm                             | Citation count            | Considers the prestige of the scientists citing the article but assumes equal contribution of each author to the paper.                                                                                                   |
| Zhu        | 2015 | arXiv                  | Researcher | Metric | The hip index - Influence-primed h-index | h-index                   | The hip-index weights citations by how many times a reference is mentioned, which is thought to make it a better indicator of researcher performance.                                                                     |
| Zhuo       | 2008 | Omega                  | Other      | Metric | Z factor                                 | IF                        | Uses both the number of publications and the impact factors of the journals in which they were published.                                                                                                                 |
| Zou        | 2016 | Scientometrics         | Researcher | Metric | S-ZP index                               | IF                        | Metric based on journal impact factor of publications and author order.                                                                                                                                                   |
| Zyczkowski | 2010 | Scientometrics         | Both       | Metric | C - Citation matrix                      | h-index                   | A scheme based on weighing the citation based on previous scientific achievements and authors citing the paper.                                                                                                           |

# Reporting checklist for systematic review and meta-analysis.

Based on the PRISMA guidelines.

## Instructions to authors

Complete this checklist by entering the page numbers from your manuscript where readers will find each of the items listed below.

Your article may not currently address all the items on the checklist. Please modify your text to include the missing information. If you are certain that an item does not apply, please write "n/a" and provide a short explanation.

Upload your completed checklist as an extra file when you submit to a journal.

In your methods section, say that you used the PRISMA reporting guidelines, and cite them as:

Moher D, Liberati A, Tetzlaff J, Altman DG, The PRISMA Group. Preferred Reporting Items for Systematic Reviews and Meta-Analyses: The PRISMA Statement

|                    | Reporting Item                                                                                                                                                                                                                                                                                                                | Page Number     |
|--------------------|-------------------------------------------------------------------------------------------------------------------------------------------------------------------------------------------------------------------------------------------------------------------------------------------------------------------------------|-----------------|
|                    | <a href="#">#1</a> Identify the report as a systematic review, meta-analysis, or both.                                                                                                                                                                                                                                        | Title page      |
| Structured summary | <a href="#">#2</a> Provide a structured summary including, as applicable: background; objectives; data sources; study eligibility criteria, participants, and interventions; study appraisal and synthesis methods; results; limitations; conclusions and implications of key findings; systematic review registration number | 2               |
| Rationale          | <a href="#">#3</a> Describe the rationale for the review in the context of what is already known.                                                                                                                                                                                                                             | 4               |
| Objectives         | <a href="#">#4</a> Provide an explicit statement of questions being addressed with reference to participants, interventions, comparisons, outcomes, and study design (PICOS).                                                                                                                                                 | 4-5             |
| Protocol and       | <a href="#">#5</a> Indicate if a review protocol exists, if and where it                                                                                                                                                                                                                                                      | Review protocol |

|                                                          |                                    |                                                                                                                                                                                                                                                     |                                                                         |
|----------------------------------------------------------|------------------------------------|-----------------------------------------------------------------------------------------------------------------------------------------------------------------------------------------------------------------------------------------------------|-------------------------------------------------------------------------|
| 1<br>2<br>3<br>4                                         | registration                       | can be accessed (e.g., Web address) and, if available, provide registration information including the registration number.                                                                                                                          | exists but is unpublished                                               |
| 5<br>6<br>7<br>8<br>9<br>10<br>11                        | Eligibility criteria               | <a href="#">#6</a> Specify study characteristics (e.g., PICOS, length of follow-up) and report characteristics (e.g., years considered, language, publication status) used as criteria for eligibility, giving rational                             | 5-6                                                                     |
| 12<br>13<br>14<br>15<br>16<br>17<br>18                   | Information sources                | <a href="#">#7</a> Describe all information sources in the search (e.g., databases with dates of coverage, contact with study authors to identify additional studies) and date last searched.                                                       | 4                                                                       |
| 19<br>20<br>21<br>22<br>23                               | Search                             | <a href="#">#8</a> Present full electronic search strategy for at least one database, including any limits used, such that it could be repeated.                                                                                                    | 4                                                                       |
| 24<br>25<br>26<br>27<br>28<br>29<br>30                   | Study selection                    | <a href="#">#9</a> State the process for selecting studies (i.e., for screening, for determining eligibility, for inclusion in the systematic review, and, if applicable, for inclusion in the meta-analysis).                                      | 4-6                                                                     |
| 31<br>32<br>33<br>34<br>35<br>36<br>37                   | Data collection process            | <a href="#">#10</a> Describe the method of data extraction from reports (e.g., piloted forms, independently by two reviewers) and any processes for obtaining and confirming data from investigators.                                               | 5-6 and Appendix 1                                                      |
| 38<br>39<br>40<br>41<br>42                               | Data items                         | <a href="#">#11</a> List and define all variables for which data were sought (e.g., PICOS, funding sources), and any assumptions and simplifications made.                                                                                          | Page 5 and Appendix 1                                                   |
| 43<br>44<br>45<br>46<br>47<br>48<br>49<br>50             | Risk of bias in individual studies | <a href="#">#12</a> Describe methods used for assessing risk of bias in individual studies (including specification of whether this was done at the study or outcome level, or both), and how this information is to be used in any data synthesis. | 5                                                                       |
| 51<br>52<br>53<br>54<br>55<br>56<br>57<br>58<br>59<br>60 | Summary measures                   | <a href="#">#13</a> State the principal summary measures (e.g., risk ratio, difference in means).                                                                                                                                                   | The primary outcome measure was methods to assess research achievement. |



|    |                 |                     |                                                                |                        |
|----|-----------------|---------------------|----------------------------------------------------------------|------------------------|
| 1  | Planned         | <a href="#">#14</a> | Describe the methods of handling data and                      | 5-6                    |
| 2  | methods of      |                     | combining results of studies, if done, including               |                        |
| 3  | analysis        |                     | measures of consistency (e.g., I <sup>2</sup> ) for each meta- |                        |
| 4  |                 |                     | analysis.                                                      |                        |
| 5  |                 |                     |                                                                |                        |
| 6  |                 |                     |                                                                |                        |
| 7  |                 |                     |                                                                |                        |
| 8  | Risk of bias    | <a href="#">#15</a> | Specify any assessment of risk of bias that may                | 5                      |
| 9  | across studies  |                     | affect the cumulative evidence (e.g., publication              |                        |
| 10 |                 |                     | bias, selective reporting within studies).                     |                        |
| 11 |                 |                     |                                                                |                        |
| 12 |                 |                     |                                                                |                        |
| 13 | Additional      | <a href="#">#16</a> | Describe methods of additional analyses (e.g.,                 | 7-11                   |
| 14 | analyses        |                     | sensitivity or subgroup analyses, meta-regression),            |                        |
| 15 |                 |                     | if done, indicating which were pre-specified.                  |                        |
| 16 |                 |                     |                                                                |                        |
| 17 |                 |                     |                                                                |                        |
| 18 | Study selection | <a href="#">#17</a> | Give numbers of studies screened, assessed for                 | 6-7                    |
| 19 |                 |                     | eligibility, and included in the review, with reasons          |                        |
| 20 |                 |                     | for exclusions at each stage, ideally with a flow              |                        |
| 21 |                 |                     | diagram.                                                       |                        |
| 22 |                 |                     |                                                                |                        |
| 23 |                 |                     |                                                                |                        |
| 24 |                 |                     |                                                                |                        |
| 25 | Study           | <a href="#">#18</a> | For each study, present characteristics for which              | 7-11                   |
| 26 | characteristics |                     | data were extracted (e.g., study size, PICOS, follow-          |                        |
| 27 |                 |                     | up period) and provide the citation.                           |                        |
| 28 |                 |                     |                                                                |                        |
| 29 |                 |                     |                                                                |                        |
| 30 | Risk of bias    | <a href="#">#19</a> | Present data on risk of bias of each study and, if             | 5                      |
| 31 | within studies  |                     | available, any outcome-level assessment (see Item              |                        |
| 32 |                 |                     | 12).                                                           |                        |
| 33 |                 |                     |                                                                |                        |
| 34 |                 |                     |                                                                |                        |
| 35 |                 |                     |                                                                |                        |
| 36 | Results of      | <a href="#">#20</a> | For all outcomes considered (benefits and harms),              | 7-11                   |
| 37 | individual      |                     | present, for each study: (a) simple summary data for           |                        |
| 38 | studies         |                     | each intervention group and (b) effect estimates and           |                        |
| 39 |                 |                     | confidence intervals, ideally with a forest plot.              |                        |
| 40 |                 |                     |                                                                |                        |
| 41 |                 |                     |                                                                |                        |
| 42 |                 |                     |                                                                |                        |
| 43 | Synthesis of    | <a href="#">#21</a> | Present the main results of the review. If meta-               | Not applicable to this |
| 44 | results         |                     | analyses are done, include for each, confidence                | review.                |
| 45 |                 |                     | intervals and measures of consistency.                         |                        |
| 46 |                 |                     |                                                                |                        |
| 47 |                 |                     |                                                                |                        |
| 48 | Risk of bias    | <a href="#">#22</a> | Present results of any assessment of risk of bias              | 5                      |
| 49 | across studies  |                     | across studies (see Item 15).                                  |                        |
| 50 |                 |                     |                                                                |                        |
| 51 |                 |                     |                                                                |                        |
| 52 | Additional      | <a href="#">#23</a> | Give results of additional analyses, if done (e.g.,            | Not applicable to this |
| 53 | analysis        |                     | sensitivity or subgroup analyses, meta-regression              | review.                |
| 54 |                 |                     | [see Item 16]).                                                |                        |
| 55 |                 |                     |                                                                |                        |
| 56 |                 |                     |                                                                |                        |
| 57 | Summary of      | <a href="#">#24</a> | Summarize the main findings, including the strength            | 13-16                  |
| 58 | Evidence        |                     | of evidence for each main outcome; consider their              |                        |
| 59 |                 |                     |                                                                |                        |
| 60 |                 |                     |                                                                |                        |

1 relevance to key groups (e.g., health care providers,  
2 users, and policy makers

|    |             |                                                                            |       |
|----|-------------|----------------------------------------------------------------------------|-------|
| 3  |             |                                                                            |       |
| 4  | Limitations | <a href="#">#25</a> Discuss limitations at study and outcome level (e.g.,  | 16    |
| 5  |             | risk of bias), and at review level (e.g., incomplete                       |       |
| 6  |             | retrieval of identified research, reporting bias).                         |       |
| 7  |             |                                                                            |       |
| 8  |             |                                                                            |       |
| 9  | Conclusions | <a href="#">#26</a> Provide a general interpretation of the results in the | 16-17 |
| 10 |             | context of other evidence, and implications for future                     |       |
| 11 |             | research.                                                                  |       |
| 12 |             |                                                                            |       |
| 13 |             |                                                                            |       |
| 14 | Funding     | <a href="#">#27</a> Describe sources of funding or other support (e.g.,    | 18    |
| 15 |             | supply of data) for the systematic review; role of                         |       |
| 16 |             | funders for the systematic review.                                         |       |
| 17 |             |                                                                            |       |
| 18 |             |                                                                            |       |
| 19 |             |                                                                            |       |

20 The PRISMA checklist is distributed under the terms of the Creative Commons Attribution License  
21 CC-BY. This checklist can be completed online using <https://www.goodreports.org/>, a tool made by  
22 the [EQUATOR Network](#) in collaboration with [Penelope.ai](#)  
23  
24  
25  
26  
27  
28  
29  
30  
31  
32  
33  
34  
35  
36  
37  
38  
39  
40  
41  
42  
43  
44  
45  
46  
47  
48  
49  
50  
51  
52  
53  
54  
55  
56  
57  
58  
59  
60

# BMJ Open

**The Comprehensive Researcher Achievement Model  
(CRAM):  
a framework for measuring researcher achievement, impact  
and influence derived from a systematic literature review of  
metrics and models**

|                               |                                                                                                                                                                                                                                                                                                                                                                                                                                                                                                                                                                                                                                                                                                                                                                                                                                                                                                                                                                                                                                                                                                                                                                                                                                                                                                                                                                                                                                                                                                                                                                                                                                                                                                                                                                                                                                                                                                                                                                             |
|-------------------------------|-----------------------------------------------------------------------------------------------------------------------------------------------------------------------------------------------------------------------------------------------------------------------------------------------------------------------------------------------------------------------------------------------------------------------------------------------------------------------------------------------------------------------------------------------------------------------------------------------------------------------------------------------------------------------------------------------------------------------------------------------------------------------------------------------------------------------------------------------------------------------------------------------------------------------------------------------------------------------------------------------------------------------------------------------------------------------------------------------------------------------------------------------------------------------------------------------------------------------------------------------------------------------------------------------------------------------------------------------------------------------------------------------------------------------------------------------------------------------------------------------------------------------------------------------------------------------------------------------------------------------------------------------------------------------------------------------------------------------------------------------------------------------------------------------------------------------------------------------------------------------------------------------------------------------------------------------------------------------------|
| Journal:                      | <i>BMJ Open</i>                                                                                                                                                                                                                                                                                                                                                                                                                                                                                                                                                                                                                                                                                                                                                                                                                                                                                                                                                                                                                                                                                                                                                                                                                                                                                                                                                                                                                                                                                                                                                                                                                                                                                                                                                                                                                                                                                                                                                             |
| Manuscript ID                 | bmjopen-2018-025320.R1                                                                                                                                                                                                                                                                                                                                                                                                                                                                                                                                                                                                                                                                                                                                                                                                                                                                                                                                                                                                                                                                                                                                                                                                                                                                                                                                                                                                                                                                                                                                                                                                                                                                                                                                                                                                                                                                                                                                                      |
| Article Type:                 | Research                                                                                                                                                                                                                                                                                                                                                                                                                                                                                                                                                                                                                                                                                                                                                                                                                                                                                                                                                                                                                                                                                                                                                                                                                                                                                                                                                                                                                                                                                                                                                                                                                                                                                                                                                                                                                                                                                                                                                                    |
| Date Submitted by the Author: | 18-Nov-2018                                                                                                                                                                                                                                                                                                                                                                                                                                                                                                                                                                                                                                                                                                                                                                                                                                                                                                                                                                                                                                                                                                                                                                                                                                                                                                                                                                                                                                                                                                                                                                                                                                                                                                                                                                                                                                                                                                                                                                 |
| Complete List of Authors:     | <p>Braithwaite, Jeffrey; Macquarie University, Australian Institute of Health Innovation<br/> Herkes, Jessica; Macquarie University, Australian Institute of Health Innovation<br/> Churruca, Kate; Macquarie University, Australian Institute of Health Innovation; Macquarie University<br/> Long, Janet; Australian Institute of Health Innovation, Centre for Healthcare Resilience and Implementation Science<br/> Pomare, Chiara; Macquarie University Faculty of Medicine and Health Sciences, Australian Institute of Health Innovation<br/> Boyling, Claire; Macquarie University Faculty of Medicine and Health Sciences, Australian Institute of Health Innovation<br/> Bierbaum, Mia; Macquarie University, Australian Institute of Health Innovation<br/> Clay-Williams, Robyn; Macquarie University, Australian Institute of Health Innovation<br/> Rapport, Frances; Macquarie University, Australian Institute of Health Innovation<br/> Shih, Patti; Macquarie University, Australian Institute of Health Innovation<br/> Hogden, Anne; Macquarie University, Australian Institute of Health Innovation<br/> Ellis, Louise A.; Macquarie University, Institute of Health Innovation<br/> Ludlow, Kristiana; Macquarie University, Australian Institute of Health Innovation<br/> Austin, Elizabeth; Macquarie University Faculty of Medicine and Health Sciences, Australian Institute of Health Innovation<br/> Seah, Rebecca; Macquarie University Faculty of Medicine and Health Sciences, Australian Institute of Health Innovation<br/> McPherson, Elise; Macquarie University, Australian Institute of Health Innovation<br/> Hibbert, Peter; Macquarie University Faculty of Medicine and Health Sciences, Faculty of Medicine and Health Sciences; University of South Australia Division of Health Sciences,<br/> Westbrook, Johanna; Macquarie University Faculty of Medicine and Health Sciences, Australian Institute of Health Innovation</p> |

1  
2  
3  
4  
5  
6  
7  
8  
9  
10  
11  
12  
13  
14  
15  
16  
17  
18  
19  
20  
21  
22  
23  
24  
25  
26  
27  
28  
29  
30  
31  
32  
33  
34  
35  
36  
37  
38  
39  
40  
41  
42  
43  
44  
45  
46  
47  
48  
49  
50  
51  
52  
53  
54  
55  
56  
57  
58  
59  
60

|                                   |                                                                                                                                       |
|-----------------------------------|---------------------------------------------------------------------------------------------------------------------------------------|
| <b>Primary Subject Heading:</b>   | Research methods                                                                                                                      |
| <b>Secondary Subject Heading:</b> | Health services research                                                                                                              |
| <b>Keywords:</b>                  | Researcher assessment, Research metrics, h-index, Journal impact factor, Comprehensive Researcher Achievement Model (CRAM), Citations |
|                                   |                                                                                                                                       |

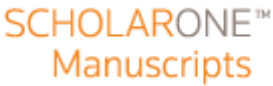

1  
2  
3 1 **The Comprehensive Researcher Achievement Model (CRAM):**  
4  
5 2 **a framework for measuring researcher achievement, impact and influence derived from**  
6  
7 3 **a systematic literature review of metrics and models**  
8  
9 4

10  
11 5 **Authors**

12 6 Professor Jeffrey Braithwaite (JB)\*<sup>1</sup>, BA, MIR (Hons), MBA, DipLR, PhD, FIML, FCHSM, FFPHRCP (UK),  
13 7 FACSS, Hon FRACMA, FAHMS

14 8 Ms Jessica Herkes (JH)<sup>1</sup>, BSc (Adv), MRes

15 9 Dr Kate Churruca (KC)<sup>1</sup>, BA (Hons) Psych, PhD

16 10 Dr Janet C Long (JCL)<sup>1</sup>, BSc (Hons), MN (Ed), CertOphNurs, PhD, FISQua

17 11 Ms Chiara Pomare (CP)<sup>1</sup>, BPsych (Hons), MRes

18 12 Ms Claire Boyling (CB)<sup>1</sup>, BHSc (Health Promotion)

19 13 Ms Mia Bierbaum (MB)<sup>1</sup>, BSc (Biomedical), B.Ed, Grad Dip TESOL, MPH

20 14 Dr Robyn Clay-Williams (RC-W)<sup>1</sup>, BEng, PhD

21 15 Professor Frances Rapport (FR)<sup>1</sup>, BA (Hons), Cert Ed, FRSA, MPhil, PhD

22 16 Dr Patti Shih (PS)<sup>1</sup>, BA(Hons), M.Pub.Pol., PhD

23 17 Dr Anne Hogden (AH)<sup>1</sup>, BA (Hons), B SpPath, PhD, FISQua

24 18 Dr Louise A Ellis (LAE)<sup>1</sup>, BPsych (Hons), PhD

25 19 Ms Kristiana Ludlow (KL)<sup>1</sup>, BPsych (Hons), MRes

26 20 Dr Elizabeth Austin (EA)<sup>1</sup>, BA (Hons) Psych, PhD

27 21 Ms Rebecca Seah (RS)<sup>1</sup>, BSc Psychology (Hons I) Bcomm

28 22 Ms Elise McPherson (EM)<sup>1</sup>, BA, BSc(Hons)

29 23 Mr Peter Hibbert (PH)<sup>1</sup>, B.App.Sc (Physio), Grad.Dip. Comp, Grad.Dip. Econ, FAAQHC

30 24 Professor Johanna I Westbrook (JIW)<sup>1</sup>, BAppSc, GradDipAppEpid, MHA, PhD

31 25

32 26 <sup>1</sup>Australian Institute of Health Innovation, Macquarie University, Sydney, Australia

33 27

34 28 **\*Corresponding Author**

35 29 Level 6, 75 Talavera Rd

36 30 Macquarie University, North Ryde

37 31 New South Wales, Australia, 2109

38 32 e: [Jeffrey.braithwaite@mq.edu.au](mailto:Jeffrey.braithwaite@mq.edu.au)

39 33

## 34 **ABSTRACT**

35 **Objectives** Effective researcher assessment is key to decisions about funding allocations,  
36 promotion and tenure. We aimed to identify what is known about methods for assessing  
37 researcher achievements, leading to a new composite assessment model.

38 **Design** We systematically reviewed the literature via the Preferred Reporting Items for  
39 Systematic Review and Meta-Analysis Protocols (PRISMA-P) framework.

40 **Data sources** All Web of Science databases (including Core Collection, MEDLINE, and  
41 BIOSIS Citation Index) to the end of 2017.

42 **Eligibility criteria** (1) English language, (2) published in the last 10 years (2007-2017), (3)  
43 full text was available, and (4) the article discussed an approach to the assessment of an  
44 individual researcher's achievements.

45 **Data extraction and synthesis** Articles were allocated amongst four pairs of reviewers for  
46 screening, with each pair was randomly assigned 5% of their allocation to review  
47 concurrently against inclusion criteria, with inter-rater reliability assessed using Cohen's  
48 Kappa ( $\kappa$ ). The  $\kappa$  statistic showed agreement ranged from moderate to almost perfect  
49 (0.4848-0.9039). Following screening, selected articles underwent full text review and bias  
50 assessed.

51 **Results** Four hundred and seventy-eight articles were included in the final review.  
52 Established approaches developed prior to our inclusion period (e.g., citations and outputs, h-  
53 index, journal impact factor), remained dominant in the literature and in practice. New  
54 bibliometric methods and models emerged in the last 10 years including: measures based on  
55 PageRank algorithms or "altmetric" data, methods to apply peer judgement, and techniques to  
56 assign values to publication quantity and quality. Each assessment method tended to  
57 prioritize certain aspects of achievement over others.

58 **Conclusions** All metrics and models focus on an element or elements, at the expense of  
59 others. A new composite design, the Comprehensive Researcher Achievement Model  
60 (CRAM) is presented which supersedes past anachronistic models. The CRAM is modifiable  
61 to a range of applications.

62 **Keywords:** Researcher assessment; Research metrics; h-index; Journal impact factor;  
63 citations; outputs; Comprehensive Researcher Achievement Model (CRAM)

## 65 **Article Summary**

### 66 **Strengths and limitations of this study**

- 1  
2  
3 67 • A large, diverse dataset of over 478 articles, containing many ideas for assessing  
4 researcher performance, was analyzed  
5 68  
6  
7 69 • Strengths of the review include executing a wide-ranging search strategy, and the  
8 consequent high number of included articles for review; the results are limited by the  
9 70 literature itself, e.g., new metrics were not mentioned in the articles, and therefore not  
10 71 captured in the results  
11  
12 72  
13  
14 73 • A new model combining multiple factors to assess researcher performance is now  
15 available  
16 74  
17 75 • Its strengths include combining quantitative and qualitative components in the one  
18 model  
19 76  
20  
21 77 • The CRAM model, despite being evidence-oriented, is a generic one and now needs  
22 to be applied in the field  
23 78  
24  
25  
26  
27  
28  
29  
30  
31  
32  
33  
34  
35  
36  
37  
38  
39  
40  
41  
42  
43  
44  
45  
46  
47  
48  
49  
50  
51  
52  
53  
54  
55  
56  
57  
58  
59  
60

## 79 INTRODUCTION

80 Judging researchers' achievements and academic impact continues to be an important means  
81 of allocating scarce research funds and assessing candidates for promotion or tenure. It has  
82 historically been carried out through some form of expert peer judgement, to assess the  
83 number and quality of outputs, and in more recent decades, citations to them. This approach  
84 requires judgements regarding the weight which should be assigned to the number of  
85 publications, their quality, where they were published, and their downstream influence or  
86 impact. There are significant questions about the extent to which human judgement based on  
87 these criteria is an effective mechanism for making these complex assessments in a consistent  
88 and unbiased way.(1-3) Criticisms of peer assessment, even when underpinned by relatively  
89 impartial productivity data, include the propensity for bias, inconsistency among reviewers,  
90 nepotism, group-think and subjectivity.(4-7)

91 To compensate for these limitations, approaches have been proposed that rely less on  
92 subjective judgement and more on objective indicators.(3, 8-10) Indicators of achievement  
93 focus on one or a combination of four aspects: quantity of researcher outputs (*productivity*);  
94 value of outputs (*quality*); outcomes of research outputs (*impact*); and relations between  
95 publications or authors and the wider world (*influence*).(11-15) Online publishing of journal  
96 articles has provided the opportunity to easily track citations and user interactions (e.g.,  
97 number of article downloads) and thus has provided a new set of indices against which  
98 individual researchers, journals and articles can be compared and the relative worth of  
99 contributions assessed and valued.(14) These relatively new metrics have been collectively  
100 termed *bibliometrics*(16) when based on citations and numbers of publications, or  
101 *altmetrics*(17) when calculated by alternative online measures of impact such as number of  
102 downloads or social media mentions.(16)

103 The most established metrics for inferring researcher achievement are the h-index and  
104 the Journal Impact Factor (JIF). The JIF measures the average number of citations of an  
105 article in the journal over the previous year, and hence is a good indication of journal quality  
106 but is increasingly regarded as a primitive measure of quality for individual researchers.(18)  
107 The h-index, proposed by Hirsch in 2005,(19) attempts to portray a researcher's productivity  
108 and impact in one data point. The h-index is defined as the number (*h*) of articles published  
109 by a researcher that have received a citation count of at least *h*. Use of the h-index has  
110 become widespread, reflected in its inclusion in author profiles on online databases such as  
111 Google Scholar and Scopus.



1  
2  
3 112 Also influenced by the advent of online databases, there has been a proliferation of  
4  
5 113 other assessment models and metrics,(16) many of which purport to improve upon existing  
6  
7 114 approaches.(20, 21) These include methods that assess the impact of articles measured by:  
8  
9 115 downloads or online views received; practice change related to specific research; take-up by  
10  
11 116 the scientific community; or mentions in social media.

12 117 Against the backdrop of growth in metrics and models for assessing researchers'  
13  
14 118 achievements, there is a lack of guidance on the relative strengths and limitations of these  
15  
16 119 different approaches. Understanding them is of fundamental importance to funding bodies  
17  
18 120 that drive the future of research, tenure and promotion committees, and more broadly for  
19  
20 121 providing insights into how we recognize and value the work of science and scientists,  
21  
22 122 particularly those researching in medicine and healthcare. This review aimed to identify  
23  
24 123 approaches to assessing researchers' achievements published in the academic literature over  
25  
26 124 the last 10 years, considering their relative strengths and limitations and drawing on this to  
27  
28 125 propose a new composite assessment model.  
29  
30 126

## 31 127 **METHOD**

### 32 128 **Search Strategy**

33  
34 129 All Web of Science databases (eight in total, including Web of Science Core Collection,  
35  
36 130 MEDLINE, and BIOSIS Citation Index) were searched using terms related to researcher  
37  
38 131 achievement (*researcher excellence, track record, researcher funding, researcher perform\**,  
39  
40 132 *relative to opportunity, researcher potential, research\* career pathway, academic career*  
41  
42 133 *pathway, funding system, funding body, researcher impact, scientific\* productivity, academic*  
43  
44 134 *productivity, top researcher, researcher ranking, grant application, researcher output,*  
45  
46 135 *h\*index, i\*index, impact factor, individual researcher*) and approaches to its assessment  
47  
48 136 (*model, framework, assess\*, evaluat\*, \*metric\*, measur\*, criteri\*, citation\*, unconscious*  
49  
50 137 *bias, rank\**) with “\*” used as an unlimited truncation to capture variation in search terms, as  
51  
52 138 seen in **Appendix 1**. These two searches were combined (using “and”) and results were  
53  
54 139 downloaded into EndNote, the reference management software.

### 55 140 **Study Selection**

56  
57 141 After removing duplicate references in EndNote,(22) articles were allocated amongst pairs of  
58  
59 142 reviewers (MB-JCL, CP-CB, KL-JH, KC-LAE) for screening against inclusion criteria.  
60  
143 Following established procedures,(23, 24) each pair was randomly assigned 5% of their

1  
2  
3 144 allocation to review concurrently against inclusion criteria, with inter-rater reliability  
4  
5 145 assessed using Cohen's Kappa ( $\kappa$ ). The  $\kappa$  statistic was calculated for pairs of researchers, with  
6  
7 146 agreement ranging from moderate to almost perfect (0.4848-0.9039).(25) Following the  
8  
9 147 abstract and title screen, selected articles underwent full text review. Reasons for exclusion  
10  
11 148 were recorded.

### 12 13 149 **Inclusion Criteria**

14  
15 150 The following inclusion criteria were operationalized: (1) English language, (2) published in  
16  
17 151 the last 10 years (2007-2017), (3) full text for the article was available, and (4) the article  
18  
19 152 discussed an approach to the assessment of an individual researcher's achievements (at the  
20  
21 153 researcher or singular output-level). The research followed the Preferred Reporting Items for  
22  
23 154 Systematic Review and Meta-Analysis Protocols (PRISMA-P) framework.(26) Empirical and  
24  
25 155 non-empirical articles were included, because many articles proposing new approaches to  
26  
27 156 assessment, or discussing the limitations of existing ones, are not level one evidence or  
28  
29 157 research-based.

### 30 158 **Data Extraction**

31  
32 159 Data from the included articles were extracted, including: the country of article origin, the  
33  
34 160 characteristics of the models or metrics discussed, the perspective the article presented on the  
35  
36 161 metric or model (positive, negative, indeterminable) including any potential benefits or  
37  
38 162 limitations of the assessment model (and if these were perceived or based on some form of  
39  
40 163 evidence). A customised data extraction sheet was developed in Microsoft Excel, trialed  
41  
42 164 among members of the research team and subsequently refined. This information was  
43  
44 165 synthesized for each model and metric identified through narrative techniques. The  
45  
46 166 publication details and classification of each paper are contained in **Appendix 2**.

### 47 167 **Appraisal of the Literature**

48  
49 168 Due to the prevalence of non-empirical articles in this field (e.g., editorial contributions,  
50  
51 169 commentaries), it was determined that a risk of bias tool such as the Quality Assessment Tool  
52  
53 170 could not be applied.(27) Rather, assessors were trained in multiple meetings (October 24,  
54  
55 171 October 30, November 13, 2017) to critically assess the quality of articles. Given the topic of  
56  
57 172 the review (focusing on the publication process), the type of models and metrics identified  
58  
59 173 (i.e., more metrics that use publication metrics) may influence the cumulative evidence and  
60

1  
2  
3 174 subsequently create a risk of bias. In addition, three researchers (JH, EM, CB) reviewed every  
4  
5 175 included article, to extract documented conflicts of interests of authors.  
6  
7

## 8 176 **Patient and public involvement**

9 177 Patients and the public were not involved in this systematic review.  
10

## 11 178 **RESULTS**

12  
13  
14 179 The final dataset consisted of 478 academic articles. The data screening process is presented  
15  
16 180 in **Figure 1**.

### 17 181 **Figure 1. Data screening and extraction process for academic articles**

18 182 <Insert Figure 1>

19  
20  
21 183 Of the 478 included papers (see **Appendix 2** for a summary), 295 (61.7%) had an  
22  
23 184 empirical component, which ranged from interventional studies that assessed researcher  
24  
25 185 achievement as an outcome measure (e.g., a study measuring the outcomes of a training  
26  
27 186 program),(28) as a predictor(29-31) (e.g., a study that demonstrated the association between  
28  
29 187 number of citations early in one's career and later career productivity), or reported a  
30  
31 188 descriptive analysis of a new metric.(32, 33) One hundred and sixty-six (34.7%) papers were  
32  
33 189 not empirical, including editorial or opinion contributions that discussed the assessment of  
34  
35 190 research achievement, or proposed models for assessing researcher achievement. Seventeen  
36  
37 191 papers (3.6%) were reviews that considered one or more elements of assessing researcher  
38  
39 192 achievements. The quality of these contributions ranged in terms of the risk of bias in the  
40  
41 193 viewpoint expressed. Only for 19 papers (4.0%) did the authors declare a potential conflict of  
42  
43 194 interest.

44  
45 195 Across the study period, 78 articles (16.3%) involved authors purporting to propose  
46  
47 196 new models or metrics. Most articles described or cited pre-existing metrics and largely  
48  
49 197 discussed their perceived strengths and limitations. **Figure 2** shows the proportion of positive  
50  
51 198 or negative discussions of five of the most common approaches to assessing an individual's  
52  
53 199 research achievement (altmetrics, peer-review, h-index, simple counts, and JIF). The  
54  
55 200 approach with most support was altmetrics (51.0% of articles mentioning altmetrics). The JIF  
56  
57 201 was discussed with mostly negative sentiments in relevant articles (69.4%).  
58  
59 202

### 60 203 **Figure 2. Percentages of positive and negative discussion regarding selected commonly 204 used metrics for assessing individual researchers (n=478 articles)**

205 <Insert Figure 2>

206 Legend: Positive discussion refers to articles that discuss the metric in a favorable light or focus on the strengths  
207 of the metric; negative discussion refers to articles that focus on the limitations or shortcomings of the metric.

## 208 **Citation-Based Metrics**

### 209 *Publication and Citation Counts*

210 One hundred and fifty-three papers (32.0%) discussed the use of publication and citation  
211 counts for purposes of assessing researcher achievement, with papers describing them as a  
212 simple “traditional but somewhat crude measure”,(34) as well as the building blocks for other  
213 metrics.(35) A researcher’s number of publications, commonly termed an n-index,(36) was  
214 suggested by some to indicate researcher productivity,(14) rather than quality, impact or  
215 influence of these papers.(37) On the other hand, the literature suggested that numbers of  
216 citations indicated the academic impact of an individual publication or researcher’s body of  
217 work, calculated as an author’s cumulative or mean citations per article.(38) Some studies  
218 found support for the validity of citation counts and publications in that they were correlated  
219 with other indications of a researcher’s achievement, such as awards and grant funding,(39,  
220 40) and predictive of long term success in a field.(41) For example, one paper argued that  
221 having larger numbers of publications and being highly cited early in one’s career predicted  
222 later high quality research.(42)

223 A number of limitations of using citation or publication counts was observed. For  
224 example, Minasny et al. (2013) highlighted discrepancies between publications and citations  
225 counts in different databases because of their differential structures and inputs.(43) Other  
226 authors(38, 44, 45) noted that citation patterns vary by discipline, which they suggested can  
227 make them inappropriate for comparing researchers from different fields. Average citations  
228 per publication were reported as highly sensitive to change or could be skewed if, for  
229 example, a researcher has one heavily-cited article.(46, 47) A further disadvantage is the lag-  
230 effect of citations,(48, 49) and that in most models citations and publications count equally  
231 for all co-authors, despite potential differential contributions.(50) Some also questioned the  
232 extent to which citations actually indicated quality or impact, noting that a paper may  
233 influence clinical practice more than academic thinking.(51) Indeed, a paper may be highly  
234 cited because it is useful (e.g., a review), controversial, or even by chance, making citations a  
235 limited indication of quality or impact.(40, 50, 52) In addition to limitations, numerous  
236 authors made the point that focusing on citation and publication counts can have unintended,  
237 negative consequences for the assessment of researcher achievement, potentially leading to  
238 gaming and manipulation, including self-citations and gratuitous authorship.(53, 54)

### 239 *Singular Output-Level Approaches*

240 Forty-one papers (8.6%) discussed models and metrics at the singular output or article-level  
241 that could be used to infer researcher achievement. The components of achievement they  
242 reported assessing were typically quality or impact.<sup>(55, 56)</sup> For example, some papers  
243 reported attempts to examine the quality of a single article by assessing its content.<sup>(57, 58)</sup>  
244 Among the metrics identified in the literature, the immediacy index (II) focused on impact by  
245 measuring the average number of cites an article received in the year it was published.<sup>(59)</sup>  
246 Similarly, Finch suggested adapting the Source Normalized Impact per Publication (SNIP; a  
247 metric used for journal-level calculations across different fields of research) to the article-  
248 level.<sup>(21)</sup>

249 Many of the article-level metrics identified could also be upscaled to produce  
250 researcher-level indications of academic impact. For example, the sScientific currENcy  
251 Tokens (CENTs), proposed by Szymanski et al. (2012), involved giving a “cent” for each  
252 new non-self-citation a publication received; CENTs are then used as the basis for the  
253 researcher-level i-index, which follows a similar approach as the h-index, but removes self-  
254 citations.<sup>(60)</sup> The TAPSIF (Temporally-Averaged Paper-Specific Impact Factor) calculates an  
255 article’s average number of citations per year combined with bonus cites for the publishing  
256 journal’s prestige, and can be aggregated to measure the overall relevance of a researcher  
257 (Temporally Averaged Author-Specific Impact Factor; TAASIF).<sup>(61)</sup>

### 258 *Journal impact factor*

259 The JIF, commonly recognized as a journal-level measure of quality,<sup>(59, 62-64)</sup> was  
260 discussed in 211 (44.1%) of the papers reviewed in relation to assessing singular outputs or  
261 individual researchers. A number of papers described the JIF being used informally to assess  
262 an individual’s research achievement at the singular output-level, and formally in countries  
263 such as France and China.<sup>(65)</sup> It implies article quality because it is typically a more  
264 competitive process to publish in journals with high impact factors.<sup>(66)</sup> Indeed, the JIF was  
265 found to be the best predictor of a paper’s propensity to receive citations.<sup>(67)</sup>

266 The JIF has a range of limitations when used to indicate journal quality,<sup>(68)</sup> including  
267 that it is disproportionately affected by highly cited, outlier articles,<sup>(41, 69)</sup> and is susceptible  
268 to “gaming” by editors.<sup>(17, 70)</sup> Other criticisms focused on using the JIF to assess individual  
269 articles or the researchers who author them.<sup>(71)</sup> Some critics claimed that using the JIF to  
270 measure an individual’s achievement encourages researchers to publish in higher-impact but

1  
2  
3 271 less-appropriate journals for their field—which ultimately means their article may not be read  
4  
5 272 by relevant researchers.(72, 73) Furthermore, the popularity of a journal was argued to be a  
6  
7 273 poor indication of the quality of any one article, with the citation distributions for calculating  
8  
9 274 JIF found to be heavily skewed (i.e., a small subset of papers receive the bulk of the citations  
10  
11 275 while some may receive none).(18) Ultimately, many commentators argued that the JIF is an  
12  
13 276 inappropriate metric to assess individual researchers because it is an aggregate metric of a  
14  
15 277 journal’s publication, and expresses nothing about any individual paper.(21, 49, 50, 74)  
16  
17 278 However, Bornmann et al. (2017) suggested one case in which it would be appropriate to use  
18  
19 279 JIF for assessing individual researchers: in relation to their recently published papers that had  
20  
21 280 not had the opportunity to accumulate citations.(75)

## 21 281 ***Researcher-Level Approaches***

### 22 282 *h-index*

23  
24  
25  
26 283 The h-index was among the most commonly discussed metrics in the literature (254 [53.1%]  
27  
28 284 of the papers reviewed); in many of these papers, it was described by authors as more  
29  
30 285 sophisticated than citation and publication counts, but still straightforward, logical and  
31  
32 286 intuitive.(76-78) Authors noted its combination of productivity (h publications) and impact  
33  
34 287 indicators (h citations) as being more reliable(79, 80) and stable than average citations per  
35  
36 288 publications(41) because it is not skewed by the influence of one popular article.(81) One  
37  
38 289 study found that the h-index correlated with other metrics more difficult to obtain.(78) It also  
39  
40 290 showed convergent validity with peer-reviewed assessments(82) and was found to be a good  
41  
42 291 predictor of future achievement.(41)

43  
44 292 However because of the lag-effect with citations and publications, the h-index  
45  
46 293 increases with a researcher’s years of activity in the field, and cannot decrease, even if  
47  
48 294 productivity later declines.(83) Hence, numerous authors suggested it was inappropriate for  
49  
50 295 comparing researchers at different career stages,(84) or those early in their career.(70) The h-  
51  
52 296 index was also noted as being susceptible to many of the critiques leveled against citation  
53  
54 297 counts, including potential for gaming, and inability to reflect differential contributions by  
55  
56 298 co-authors.(85) Because disciplines differ in citation patterns(86) some studies noted  
57  
58 299 variations in author h-indices between different methodologies(87) and within medical  
59  
60 300 subspecialties.(88) Some therefore argued that the h-index should not be used as the sole  
301  
302 301 measure of a researcher’s achievement.(88)

### 302 302 *h-index variants*



1  
2  
3 303 A number of modified versions of the h-index were identified; these purported to draw on its  
4  
5 304 basic strengths of balancing productivity with impact while redressing perceived limitations.  
6  
7 305 For example, the g-index measures global citation performance,(89) and was defined  
8  
9 306 similarly to the h-index but with more weight given to highly cited articles by assuming the  
10  
11 307 top g articles have received at least  $g^2$  citations.(90) Azer and Azer (2016) argued it was a  
12  
13 308 more useful measure of researcher productivity.(91) Another variant of the h-index identified,  
14  
15 309 the m-quotient, was suggested to minimize the potential to favor senior academics by  
16  
17 310 accounting for the time passed since a researcher has begun publishing papers.(92, 93) Other  
18  
19 311 h-index variations reported in the articles reviewed attempted to account for author  
20  
21 312 contributions, such as the h-maj index, which includes only articles in which the researcher  
22  
23 313 played a core role (based on author order); and the weighted h-index, which assigns credit  
24  
25 314 points according to author order.(89, 94)

### 315 *Recurring Issues with Citation-Based Metrics*

316 The literature review results suggested that no one citation-based metric was ideal for all  
317  
318 purposes. All of the common metrics examined focused on one aspect of an individual's  
319  
320 achievement, and thus failed to account for other aspects of achievement. The limitations  
321  
322 with some of the frequently used citation-based metrics are listed in **Box 1**.

320

#### 321 **Box 1. Common limitations in the use of citation-based metrics**

1. Challenges with reconciling differences in citation patterns across varying fields of study
2. Time-dependency issues stemming from differences in career length of researchers
3. Prioritizing impact over merit, or quality over quantity, or vice versa
4. The lag-effect of citations
5. Gaming and the ability of self-citation to distort metrics
6. Failure to account for author order
7. Contributions from authors to a publication are viewed as equal when they may not be
8. Perpetuate “publish or perish” culture
9. Potential to stifle innovation in favor of what is popular

322

### 323 **Non-Citation Based Approaches**

324 *altmetrics*

1  
2  
3 325 In contradistinction with the metrics discussed above, fifty-four papers (11.3%) discussed  
4 326 altmetrics (or “alternative metrics”), which included a wide range of techniques to measure  
5 327 non-traditional, non-citation based usage of articles, that is, influence.(17) Altmetric  
6 328 measures included the number of online article views,(95) bookmarks,(96) downloads,(41)  
7 329 PageRank algorithms(97) and attention by mainstream news,(65) in books(98) and social  
8 330 media, for example, in blogs, commentaries, online topic reviews or tweets.(99, 100) These  
9 331 metrics typically measure the “web visibility” of an output.(101) A notable example is the  
10 332 social networking site for researchers and scientists, ResearchGate, which uses an algorithm  
11 333 to score researchers based on the use of their outputs, including citations, reads, and  
12 334 recommendations.(102)

13 335 A strength of altmetrics lies in providing a measure of influence promptly after  
14 336 publication.(70, 103, 104) Moreover, altmetrics allows tracking of the downloads of multiple  
15 337 sources (e.g., students, the general public, clinicians, as well as academics) and multiple types  
16 338 of format (e.g., reports and policy documents),(105) which are useful in gauging a broader  
17 339 indication of impact or influence, compared to more traditional metrics that solely or largely  
18 340 measure acknowledgement by experts in the field through citations.(17)

19 341 Disadvantages noted in the articles reviewed included that altmetrics calculations  
20 342 have been established by commercial enterprises such as *Altmetrics LLC (London, UK)* and  
21 343 other competitors,(106) and there may be fees levied for their use. The application of these  
22 344 metrics has also not been standardized.(98) Furthermore, it has been argued that, because  
23 345 altmetrics are cumulative and typically at the article-level, they provide more an indication of  
24 346 influence or even popularity,(107) instead of quality or productivity.(108) Hence, one study  
25 347 suggested no correlation between attention on Twitter and expert analysis of an article’s  
26 348 originality, significance or rigour.(109) Another showed that Tweets predict citations.(110)  
27 349 Overall, further work needs to assess the value of altmetric scores in terms of their  
28 350 association with other traditional indicators of achievement.(111) Notwithstanding this, there  
29 351 were increasing calls to consider altmetrics alongside more conventional metrics in assessing  
30 352 researchers and their work.(112)

31 353

### 32 354 ***Past Funding***

33 355 A past record of being funded by national agencies was identified as a common measurement  
34 356 of individual academic achievement (particularly productivity, quality and impact) in a  
35 357 number of papers, and has been argued to be a reliable method that is consistent across



1  
2  
3 358 medical research.(113-115) For example, the NIH's (National Institute of Health's) RePORT  
4  
5 359 (Research Portfolio Online Reporting Tools) system encourages public accountability for  
6  
7 360 funding by providing online access to reports, data and NIH-funded research projects.(113,  
8  
9 361 116)

10 362

### 11 363 **New Metrics and Models Identified**

12  
13  
14 364 The review also identified and assessed new metrics and models that were proposed during  
15  
16 365 the review period, many of which had not gained widespread acceptance or use. While there  
17  
18 366 was considerable heterogeneity and varying degrees of complexity among the 78 new  
19  
20 367 approaches identified, there were also many areas of overlap in their methods and purposes.  
21  
22 368 For example, some papers reported on metrics that used a PageRank algorithm,(117, 118) a  
23  
24 369 form of network analysis based on structural characteristics of publications (e.g., co-  
25  
26 370 authorship or citation patterns).(14) Metrics based on PageRank purported to measure both  
27  
28 371 the direct and indirect impact of a publication or researcher. Other approaches considered the  
29  
30 372 relative contributions of authors to a paper in calculating productivity.(119) Numerous  
31  
32 373 metrics and models that built upon existing approaches were also reported.(120) For example,  
33  
34 374 some developed composite metrics that included a publication's JIF alongside an author  
35  
36 375 contribution measure(121) or other existing metrics.(122) However, each of these approaches  
37  
38 376 reported limitations, in addition to their strengths or improvements upon other methods. For  
39  
40 377 example, in focusing on productivity, a metric necessarily often neglected impact.(123)  
41  
42 378 **Appendix 3** provides a summary of these new or re-fashioned metrics and models, with  
43  
44 379 details of their basis and purpose.

45 380

46 381

### 47 382 **DISCUSSION**

48  
49 383 This systematic review identified a large number of diverse metrics and models for assessing  
50  
51 384 an individual's research achievement that have been developed in the last 10 years (2007-  
52  
53 385 2017), as evidenced in **Appendix 3**. At the same time, other approaches that pre-dated our  
54  
55 386 study time period of 2007-2017 were also discussed frequently in the literature reviewed,  
56  
57 387 including the h-index and JIF. All metrics and models proposed had their relative strengths,  
58  
59 388 based on the components of achievement they focused on, and their sophistication or  
60  
389 transparency.

1  
2  
3 390 The review also identified and assessed new metrics and over the past few decades.  
4  
5 391 Peer-review has been increasingly criticized for reliance on subjectivity and propensity for  
6  
7 392 bias,(7) and there have been arguments that the use of specific metrics may be a more  
8  
9 393 objective and fair approach for assessing individual research achievement. However, this  
10  
11 394 review has highlighted that even seemingly objective measures have a range of shortcomings.  
12  
13 395 For example, there are inadequacies in comparing researchers at different career stages, and  
14  
15 396 across disciplines with different citation patterns.(86) Furthermore, the use of citation-based  
16  
17 397 metrics can lead to gaming and potential ethical misconduct by contributing to a “publish or  
18  
19 398 perish” culture in which researchers are under pressure to maintain or improve their  
20  
21 399 publication records.(124, 125) New methods and adjustments to existing metrics have been  
22  
23 400 proposed to explicitly address some of these limitations; for example, normalizing metrics  
24  
25 401 with “exchange rates” to remove discipline-specific variation in citation patterns, thereby  
26  
27 402 making metric scores more comparable for researchers working in disparate fields.(126, 127)  
28  
29 403 Normalization techniques have also been used to assess researchers’ metrics with greater  
30  
31 404 recognition of their relative opportunity and career longevity.(128)

32  
33 405 Other criticisms of traditional approaches center less on how they calculated  
34  
35 406 achievement, and more on what they understood or assumed about its constituent elements.  
36  
37 407 In this review, the measurement of impact or knowledge gain was often exclusively tied to  
38  
39 408 citations.(129) Some articles proposed novel approaches to using citations as a measure of  
40  
41 409 impact, such as giving greater weight to citations from papers that were themselves highly  
42  
43 410 cited(130) or that come from outside the field in which the paper was published.(131)  
44  
45 411 However, even other potential means of considering scientific contributions and achievement,  
46  
47 412 such as mentoring, were still ultimately tied to citations because mentoring was measured by  
48  
49 413 the publication output of mentees.(132)

50  
51 414 A focus only on citations was widely thought to disadvantage certain types of  
52  
53 415 researchers. For example, researchers who aim to publish with a focus on influencing practice  
54  
55 416 may target more specialized or regional journals that do not have high JIFs, where their  
56  
57 417 papers will be read by the appropriate audience and findings implemented, but they may not  
58  
59 418 be well-cited.(51) In this regard, categorizing the type of journal in which an article has been  
60  
419 published in terms of its focus (e.g., industry, clinical, regional/national) may go some way  
420 toward recognizing those publications that have a clear knowledge translation intention, and  
421 therefore prioritize real-world impact over academic impact.(124) There were only a few  
422 other approaches identified that captured broader conceptualizations of knowledge gain, such  
423 as practical impact or wealth generation for the economy, and these too were often simplistic,

1  
2  
3 424 such as including patents and their citations(133) or altmetric data.(98) While altmetrics hold  
4  
5 425 potential in this regard, their use has not been standardized,(98) and they come with their own  
6  
7 426 limitations, with suggestions that they reflect popularity more so than real world impact.(107)  
8  
9 427 Other methodologies have been proposed for assessing knowledge translation and real-world  
10  
11 428 impact, but these can often be labor intensive.(134) For example, Sutherland et al.  
12  
13 429 (2011)(135) suggested that assessing individual research outputs in light of specific policy  
14  
15 430 objectives, through peer-review based scoring, may be a strategy, but this is typically not  
16  
17 431 feasible in situations such as grant funding allocation, where there are time-constraints and  
18  
19 432 large applicant pools to assess.

20  
21 433 In terms of how one can make sense of the validity of many of these emerging  
22  
23 434 approaches for assessing an individual's research achievements, metrics should demonstrate  
24  
25 435 their legitimacy empirically, as well as having a theoretical basis for their use and clearly  
26  
27 436 differentiating what aspects of quality, achievement or impact they purport to examine.(55,  
28  
29 437 67) If the recent, well-publicized(136-138) San Francisco Declaration on Research  
30  
31 438 Assessment (DORA)(139) is anything to go by, internationally there is a move away from the  
32  
33 439 assessment of individual researchers using the JIF and the journal in which the research has  
34  
35 440 been published.

36  
37  
38  
39  
40  
41  
42  
43  
44  
45  
46  
47  
48  
49  
50  
51  
52  
53  
54  
55  
56  
57  
58  
59  
60

### 442 **Figure 3. The Comprehensive Researcher Achievement Model (CRAM)**

443 <Insert Figure 3>

444 There is momentum, instead, for assessment of researcher achievements on the basis  
445 of a wider mix of measures, hence our proposed Comprehensive Researcher Achievement  
446 Model (CRAM) (**Figure 3**). On the left-hand side of this model is the researcher to be  
447 assessed, and key characteristics that influence the assessment. Among these factors, some  
448 (i.e., field or discipline, co-authorship, career longevity) can be controlled for depending on  
449 the metric, while other components, such as gaming or the research topic (i.e., whether it is  
450 “trendy” or innovative) are less amenable to control or even prediction. Online databases,  
451 which track citations and downloads and measure other forms of impact, hold much potential  
452 and will likely be increasingly used in the future to assess both individual researchers and  
453 their outputs. Hence, assessment components (past funding, articles, citations, patents,  
454 downloads, and some media traction) included in our model are those primarily accessible  
455 online.

### 456 **Strengths and Limitations**

1  
2  
3 457 The findings of this review suggest assessment components should be used with care, and  
4  
5 458 with recognition of how they can be influenced by other factors, and what aspects of  
6  
7 459 achievement they reflect (i.e., productivity, quality, impact, influence). No metric or model  
8  
9 460 singularly captures all aspects of achievement, and hence use of a range, such as the  
10  
11 461 examples in our model, is advisable. CRAM recognizes that the configuration and weighting  
12  
13 462 of assessment methods will depend on the assessors and their purpose, the resources available  
14  
15 463 for the assessment process, and access to assessment components. Our results must be  
16  
17 464 interpreted in light of our focus on academic literature. The limits of our focus on peer-  
18  
19 465 reviewed literature were evident in the fact some new metrics were not mentioned in articles,  
20  
21 466 and therefore not captured in our results. While we defined impact broadly at the outset,  
22  
23 467 overwhelmingly the literature we reviewed focused on academic, citation-based impact.  
24  
25 468 Furthermore, although we assessed bias in the ways documented, the study design limited our  
26  
27 469 ability to apply a standardized quality assessment tool.  
28  
29 470

## 471 **CONCLUSION**

30  
31 472 There is no ideal model or metric by which to assess individual researcher achievement. We  
32  
33 473 have proposed a generic model, designed to minimize risk of the use of any one or a smaller  
34  
35 474 number of metrics, but it is not proposed as an ultimate solution. The mix of assessment  
36  
37 475 components and metrics will depend on the purpose. Greater transparency in approaches used  
38  
39 476 to assess achievement including their evidence-base is required.(37) Any model used to  
40  
41 477 assess achievement for purposes such as promotion or funding allocation should include  
42  
43 478 some quantitative components, based on robust data, and be able to be rapidly updated,  
44  
45 479 presented with confidence intervals, and normalized.(37) The assessment process should be  
46  
47 480 difficult to manipulate, and explicit about the components of achievement being measured.  
48  
49 481 As such, no current metric suitably fulfills all these criteria. The best strategy to assess an  
50  
51 482 individual's research achievement is likely to involve the use of multiple approaches(140) in  
52  
53 483 order to dilute the influence and potential disadvantages of any one metric, while providing  
54  
55 484 more rounded picture of a researcher's achievement;(85, 141) this is what the CRAM aims to  
56  
57 485 contribute.

58  
59 486 All-in-all, achievement in terms of impact and knowledge gain is broader than the  
60  
487 number of articles published or their citation rates, and yet most metrics have no means of  
488 factoring in these broader issues. Altmetrics hold promise in complementing citation-based  
489 metrics and assessing more diverse notions of impact, but usage of this type of tool requires

1  
2  
3 490 further standardization.(98) Finally, despite the limitations of peer-review, the role of expert  
4  
5 491 judgement should not be discounted.(41) Metrics are perhaps best applied as a complement or  
6  
7 492 check on the peer-review process, rather than the sole means of assessment of an individual's  
8  
9 493 research achievements.(142)  
10  
11  
12  
13  
14  
15  
16  
17  
18  
19  
20  
21  
22  
23  
24  
25  
26  
27  
28  
29  
30  
31  
32  
33  
34  
35  
36  
37  
38  
39  
40  
41  
42  
43  
44  
45  
46  
47  
48  
49  
50  
51  
52  
53  
54  
55  
56  
57  
58  
59  
60

For peer review only

1  
2  
3 494 **Acknowledgements**

4  
5 495 None.

6  
7 496

8 497 **Competing Interests**

9  
10 498 The authors have declared that no competing interests exist.

11  
12 499

13 500 **Funding**

14  
15 501 The work on which this paper is based was funded by the Australian National Health and  
16  
17 502 Medical Research Council (NHMRC) for work related to an assessment of its peer review  
18  
19 503 processes being conducted by the Council. Staff of the Australian Institute of Health  
20  
21 504 Innovation undertook this systematic review for Council as part of that assessment. Other  
22  
23 505 than specifying what they would like to see from a literature review, NHMRC had no role in  
24  
25 506 the conduct of the systematic review, or the decision to publish.

26 507

27 508 **Data sharing statement**

28  
29 509 All data has been made available as Appendices.

30  
31 510

32 511 **Author Contributions**

33  
34 512 JB conceptualized and drafted the manuscript, revised it critically for important intellectual  
35  
36 513 content, and led the study. JH, KC and JCL made substantial contributions to the design,  
37  
38 514 analysis and revision of the work and critically reviewed the manuscript for important  
39  
40 515 intellectual content. CP, CB, MB, RC-W, FR, PS, AH, LAE, KL, EA, RS and EM carried out  
41  
42 516 the initial investigation, sourced and analyzed the data and revised the manuscript for  
43  
44 517 important intellectual content. PH and JIW critically commented on the manuscript,  
45  
46 518 contributed to the revision and editing of the final manuscript and reviewed the work for  
47  
48 519 important intellectual content. All authors approved the final manuscript as submitted and  
49  
50 520 agree to be accountable for all aspects of the work.



## 521 REFERENCES

- 522 1. Ibrahim N, Chaibi AH, Ben Ahmed M. New scientometric indicator for the  
523 qualitative evaluation of scientific production. *New Libr World*. 2015;116(11-12):661-  
524 76. doi:10.1108/nlw-01-2015-0002
- 525 2. Aixela FJ, Rovira-Esteva S. Publishing and impact criteria, and their bearing on  
526 translation studies: in search of comparability. *Perspectives-Studies in Translatology*.  
527 2015;23(2):265-83. doi:10.1080/0907676x.2014.972419
- 528 3. Belter CW. Bibliometric indicators: opportunities and limits. *J Med Libr Assoc*.  
529 2015;103(4):219-21. doi:10.3163/1536-5050.103.4.014
- 530 4. Frixione E, Ruiz-Zamarripa L, Hernandez G. Assessing individual intellectual output  
531 in scientific research: Mexico's national system for evaluating scholars performance  
532 in the humanities and the behavioral sciences. *PLOS One*. 2016;11(5): doi:  
533 10.1371/journal.pone.0155732. doi:10.1371/journal.pone.0155732
- 534 5. Marzolla M. Assessing evaluation procedures for individual researchers: the case of  
535 the Italian national scientific qualification. *J Informetr*. 2016;10(2):408-38.  
536 doi:10.1016/j.joi.2016.01.009
- 537 6. Marsh HW, Jayasinghe UW, Bond NW. Improving the peer-review process for grant  
538 applications-reliability, validity, bias, and generalizability. *Am Psychol*.  
539 2008;63(3):160-8. doi:10.1037/0003-066x.63.3.160
- 540 7. Kaatz A, Magua W, Zimmerman DR, et al. A quantitative linguistic analysis of  
541 national institutes of health R01 application critiques from investigators at one  
542 institution. *Acad Med*. 2015;90(1):69-75. doi:10.1097/acm.0000000000000442
- 543 8. Aoun SG, Bendok BR, Rahme RJ, et al. Standardizing the evaluation of scientific and  
544 academic performance in neurosurgery-critical review of the "h" index and its  
545 variants. *World Neurosurg*. 2013;80(5):E85-E90. doi:10.1016/j.wneu.2012.01.052
- 546 9. Hicks D, Wouters P, Waltman L, et al. Bibliometrics: the Leiden Manifesto for  
547 research metrics. *Nature*. 2015;520(7548):429-31. doi:10.1038/520429a
- 548 10. King J. A review of bibliometric and other science indicators and their role in  
549 research evaluation. *J Inf Sci*. 1987;13(5):261-76. doi:10.1177/016555158701300501
- 550 11. Abramo G, Cicero T, D'Angelo CA. A sensitivity analysis of researchers' productivity  
551 rankings to the time of citation observation. *J Informetr*. 2012;6(2):192-201.  
552 doi:10.1016/j.joi.2011.12.003
- 553 12. Arimoto A. Declining symptom of academic productivity in the Japanese research  
554 university sector. *High Educ*. 2015;70(2):155-72. doi:10.1007/s10734-014-9848-4
- 555 13. Carey RM. Quantifying scientific merit is it time to transform the impact factor? *Circ*  
556 *Res*. 2016;119(12):1273-5. doi:10.1161/circresaha.116.309883
- 557 14. Durieux V, Gevenois PA. Bibliometric indicators: quality measurements of scientific  
558 publication. *Radiology*. 2010;255(2):342-51. doi:10.1148/radiol.09090626
- 559 15. Selvarajoo K. Measuring merit: take the risk. *Science*. 2015;347(6218):139-40.
- 560 16. Wildgaard L, Schneider JW, Larsen B. A review of the characteristics of 108 author-  
561 level bibliometric indicators. *Scientometrics*. 2014;101(1):125-58.  
562 doi:10.1007/s11192-014-1423-3
- 563 17. Maximin S, Green D. The science and art of measuring the impact of an article.  
564 *Radiographics*. 2014;34(1):116-8. doi:10.1148/rg.341134008
- 565 18. Callaway E. Publishing elite turns against impact factor. *Nature*. 2016;535(7611):210-  
566 1.
- 567 19. Hirsch JE. An index to quantify an individual's scientific research output. *Proc Natl*  
568 *Acad Sci USA*. 2005;102(46):16569-72.

- 1  
2  
3 569 20. Bollen J, Crandall D, Junk D, et al. An efficient system to fund science: from proposal  
4 570 review to peer-to-peer distributions. *Scientometrics*. 2017;110(1):521-8.  
5 571 doi:10.1007/s11192-016-2110-3  
6 572 21. Finch A. Can we do better than existing author citation metrics? *Bioessays*.  
7 573 2010;32(9):744-7. doi:10.1002/bies.201000053  
8 574 22. EndNote. Clarivate Analytics; 2017.  
9 575 23. Schlosser RW. Appraising the quality of systematic reviews. *Focus: Technical Briefs*.  
10 576 2007;17:1-8.  
11 577 24. Braithwaite J, Herkes J, Ludlow K, et al. Association between organisational and  
12 578 workplace cultures, and patient outcomes: systematic review. *BMJ Open*.  
13 579 2017;7(11):e017708.  
14 580 25. Landis JR, Koch GG. The measurement of observer agreement for categorical data.  
15 581 *Biometrics*. 1977;33(1):159-74.  
16 582 26. Shamseer L, Moher D, Clarke M, et al. Preferred reporting items for systematic  
17 583 review and meta-analysis protocols (PRISMA-P) 2015: elaboration and explanation.  
18 584 *BMJ*. 2015;2(349):g7647.  
19 585 27. Hawker S, Payne S, Kerr C, et al. Appraising the evidence: reviewing disparate data  
20 586 systematically. *Qual Health Res*. 2002;12(9):1284-99.  
21 587 28. Thorngate W, Chowdhury W. By the numbers: track record, flawed reviews, journal  
22 588 space, and the fate of talented authors. In: Kaminski B, Koloch G, editors. *Advances*  
23 589 *in Social Simulation: Proceedings of the 9th Conference of the European Social*  
24 590 *Simulation Association. Advances in Intelligent Systems and Computing*. 229.  
25 591 Heidelberg, Germany: Springer Berlin; 2014. p. 177-88.  
26 592 29. Sood A, Therattil PJ, Chung S, et al. Impact of subspecialty fellowship training on  
27 593 research productivity among academic plastic surgery faculty in the United States.  
28 594 *Eplasty*. 2015;15:e50.  
29 595 30. Mutz R, Bornmann L, Daniel H-D. Testing for the fairness and predictive validity of  
30 596 research funding decisions: a multilevel multiple imputation for missing data  
31 597 approach using ex-ante and ex-post peer evaluation data from the Austrian science  
32 598 fund. *J Assoc Inf Sci Technol*. 2015;66(11):2321-39. doi:10.1002/asi.23315  
33 599 31. Rezek I, McDonald RJ, Kallmes DF. Pre-residency publication rate strongly predicts  
34 600 future academic radiology potential. *Acad Radiol*. 2012;19(5):632-4.  
35 601 doi:10.1016/j.acra.2011.11.017  
36 602 32. Knudson D. Kinesiology faculty citations across academic rank. *Quest*.  
37 603 2015;67(4):346-51. doi:10.1080/00336297.2015.1082144  
38 604 33. Wang D, Song C, Barabasi A-L. Quantifying long-term scientific impact. *Science*.  
39 605 2013;342(6154):127-32. doi:10.1126/science.1237825  
40 606 34. Efron N, Brennan NA. Citation analysis of Australia-trained optometrists. *Clin Exp*  
41 607 *Optom*. 2011;94(6):600-5. doi:10.1111/j.1444-0938.2011.00652.x  
42 608 35. Perlin MS, Santos AAP, Imasato T, et al. The Brazilian scientific output published in  
43 609 journals: a study based on a large CV database. *J Informetr*. 2017;11(1):18-31.  
44 610 doi:10.1016/j.joi.2016.10.008  
45 611 36. Stallings J, Vance E, Yang J, et al. Determining scientific impact using a  
46 612 collaboration index. *Proc Natl Acad Sci USA*. 2013;110(24):9680-5.  
47 613 doi:10.1073/pnas.1220184110  
48 614 37. Kreiman G, Maunsell JHR. Nine criteria for a measure of scientific output. *Front*  
49 615 *Comput Neurosci*. 2011;5(48): doi: 10.3389/fncom.2011.00048.  
50 616 doi:10.3389/fncom.2011.00048  
51 617 38. Mingers J. Measuring the research contribution of management academics using the  
52 618 Hirsch-index. *J Oper Res Soc*. 2009;60(9):1143-53. doi:10.1057/jors.2008.94



- 1  
2  
3 619 39. Halvorson MA, Finlay AK, Cronkite RC, et al. Ten-year publication trajectories of  
4 620 health services research career development award recipients: collaboration, awardee  
5 621 characteristics, and productivity correlates. *Eval Health Prof.* 2016;39(1):49-64.  
6 622 doi:10.1177/0163278714542848  
7  
8 623 40. Stroebe W. The graying of academia: will it reduce scientific productivity? *Am*  
9 624 *Psychol.* 2010;65(7):660-73. doi:10.1037/a0021086  
10 625 41. Agarwal A, Durairajanayagam D, Tatagari S, et al. Bibliometrics: tracking research  
11 626 impact by selecting the appropriate metrics. *Asian J Androl.* 2016;18(2):296-309.  
12 627 doi:10.4103/1008-682x.171582  
13 628 42. Jacob JH, Lehl S, Henkel AW. Early recognition of high quality researchers of the  
14 629 German psychiatry by worldwide accessible bibliometric indicators. *Scientometrics.*  
15 630 2007;73(2):117-30. doi:10.1007/s11192-006-1729-x  
16 631 43. Minasny B, Hartemink AE, McBratney A, et al. Citations and the h-index of soil  
17 632 researchers and journals in the Web of Science, Scopus, and Google Scholar. *Peerj.*  
18 633 2013;1: doi: 10.7717/peerj.183. doi:10.7717/peerj.183  
19 634 44. Gorraiz J, Gumpenberger C. Going beyond citations: SERUM - a new tool provided  
20 635 by a network of libraries. *Liber Quarterly.* 2010;20(1):80-93.  
21 636 45. van Eck NJ, Waltman L, van Raan AFJ, et al. Citation analysis may severely  
22 637 underestimate the impact of clinical research as compared to basic research. *PLOS*  
23 638 *One.* 2013;8(4): doi: 10.1371/journal.pone.0062395.  
24 639 doi:10.1371/journal.pone.0062395  
25 640 46. Meho LI, Rogers Y. Citation counting, citation ranking, and h-index of human-  
26 641 computer interaction researchers: a comparison of Scopus and Web of Science. *J*  
27 642 *Assoc Inf Sci Technol.* 2008;59(11):1711-26. doi:10.1002/asi.20874  
28 643 47. Selek S, Saleh A. Use of h index and g index for American academic psychiatry.  
29 644 *Scientometrics.* 2014;99(2):541-8. doi:10.1007/s11192-013-1204-4  
30 645 48. Kali A. Scientific impact and altmetrics. *Indian J Pharmacol.* 2015;47(5):570-1.  
31 646 doi:10.4103/0253-7613.165184  
32 647 49. Neylon C, Wu S. Article-level metrics and the evolution of scientific impact. *PLOS*  
33 648 *Biol.* 2009;7(11): doi: 10.1371/journal.pbio.1000242.  
34 649 doi:10.1371/journal.pbio.1000242  
35 650 50. Sahel J-A. Quality versus quantity: assessing individual research performance. *Sci*  
36 651 *Transl Med.* 2011;3(84): doi: 10.1126/scitranslmed.3002249.  
37 652 doi:10.1126/scitranslmed.3002249  
38 653 51. Pinnock D, Whittingham K, Hodgson LJ. Reflecting on sharing scholarship,  
39 654 considering clinical impact and impact factor. *Nurse Educ Today.* 2012;32(7):744-6.  
40 655 doi:10.1016/j.nedt.2012.05.031  
41 656 52. Eyre-Walker A, Stoletzki N. The assessment of science: the relative merits of post-  
42 657 publication review, the impact factor, and the number of citations. *PLOS Biol.*  
43 658 2013;11(10). doi:10.1371/journal.pbio.1001675  
44 659 53. Ferrer-Sapena A, Sanchez-Perez EA, Peset F, et al. The Impact Factor as a measuring  
45 660 tool of the prestige of the journals in research assessment in mathematics. *Res Eval.*  
46 661 2016;25(3):306-14. doi:10.1093/reseval/rvv041  
47 662 54. Moustafa K. Aberration of the citation. *Account Res.* 2016;23(4):230-44.  
48 663 55. Abramo G, D'Angelo CA. Refrain from adopting the combination of citation and  
49 664 journal metrics to grade publications, as used in the Italian national research  
50 665 assessment exercise (VQR 2011-2014). *Scientometrics.* 2016;109(3):2053-65.  
51 666 doi:10.1007/s11192-016-2153-5  
52 667 56. Páll-Gergely B. On the confusion of quality with impact: a note on Pyke's m-index.  
53 668 *BioScience.* 2015;65(2):117. doi:10.1093/biosci/biu207

- 1  
2  
3 669 57. Niederkrotenthaler T, Dorner TE, Maier M. Development of a practical tool to  
4 670 measure the impact of publications on the society based on focus group discussions  
5 671 with scientists. *BMC Public Health*. 2011;11(588): doi: 10.1186/471-2458-11-588.  
6 672 doi:10.1186/1471-2458-11-588
- 7 673 58. Kreines EM, Kreines MG. Control model for the alignment of the quality assessment  
8 674 of scientific documents based on the analysis of content-related context. *J Comput*  
9 675 *Syst Sci*. 2016;55(6):938-47. doi:10.1134/s1064230716050099
- 10 676 59. DiBartola SP, Hinchcliff KW. Metrics and the scientific literature: deciding what to  
11 677 read. *J Vet Intern Med*. 2017;31(3):629-32. doi:10.1111/jvim.14732
- 12 678 60. Szymanski BK, Lluís de la Rosa J, Krishnamoorthy M. An internet measure of the  
13 679 value of citations. *J Inf Sci*. 2012;185(1):18-31. doi:10.1016/j.ins.2011.08.005
- 14 680 61. Bloching PA, Heinzl H. Assessing the scientific relevance of a single publication over  
15 681 time. *S Afr J Sci*. 2013;109(9/10): doi: 10.1590/sajs.2013/20130063.
- 16 682 62. Benchimol Barbosa PR. Comments on paper by Thomas et al: how to evaluate  
17 683 "quality of publication". *Arq Bras Cardiol*. 2011;97(1):88-9.
- 18 684 63. Benchimol-Barbosa PR, Ribeiro RL, Barbosa EC. Further comments on the paper by  
19 685 Thomas et al: how to evaluate "quality of publication". *Arq Bras Cardiol*.  
20 686 2011;97(1):88.
- 21 687 64. Benchimol-Barbosa PR, Ribeiro RL, Barbosa EC. Additional comments on the paper  
22 688 by Thomas et al: how to evaluate "quality of publication". *Arq Bras Cardiol*.  
23 689 2011;97(1):88-9.
- 24 690 65. Slim K, Dupre A, Le Roy B. Impact factor: an assessment tool for journals or for  
25 691 scientists? *Anaesth Crit Care Pain Med*. 2017;36(6):347-8.  
26 692 doi:10.1016/j.accpm.2017.06.004
- 27 693 66. Diem A, Wolter SC. The use of bibliometrics to measure research performance in  
28 694 education sciences. *Res High Edu*. 2013;54(1):86-114. doi:10.1007/s11162-012-9264-  
29 695 5
- 30 696 67. Bornmann L, Leydesdorff L. Does quality and content matter for citedness? A  
31 697 comparison with para-textual factors and over time. *J Informetr*. 2015;9(3):419-29.  
32 698 doi:10.1016/j.joi.2015.03.001
- 33 699 68. Santangelo GM. Article-level assessment of influence and translation in biomedical  
34 700 research. *Mol Biol Cell*. 2017;28(11):1401-8. doi:10.1091/mbc.E16-01-0037
- 35 701 69. Ravenscroft J, Liakata M, Clare A, et al. Measuring scientific impact beyond  
36 702 academia: an assessment of existing impact metrics and proposed improvements.  
37 703 *PLOS One*. 2017;12(3). doi:10.1371/journal.pone.0173152
- 38 704 70. Trueger NS, Thoma B, Hsu CH, et al. The altmetric score: a new measure for article-  
39 705 level dissemination and impact. *Ann Emerg Med*. 2015;66(5):549-53.  
40 706 doi:10.1016/j.annemergmed.2015.04.022
- 41 707 71. Welk G, Fischman MG, Greenleaf C, et al. Editorial board position statement  
42 708 regarding the declaration on research assessment (DORA) - recommendations with  
43 709 respect to journal impact factors. *Res Q Exerc Sport*. 2014;85(4):429-30.  
44 710 doi:10.1080/02701367.2014.964104
- 45 711 72. Taylor DR, Michael LM, II, Klimo P, Jr. Not everything that matters can be measured  
46 712 and not everything that can be measured matters response. *J Neurosurg*.  
47 713 2015;123(3):544-5.
- 48 714 73. Christopher MM. Weighing the impact (factor) of publishing in veterinary journals. *J*  
49 715 *Vet Sci*. 2015;17(2):77-82. doi:10.1016/j.jvc.2015.01.002
- 50 716 74. Jokic M. H-index as a new scientometric indicator. *Biochemia Med*. 2009;19(1):5-9.
- 51 717 75. Bornmann L, Pudovkin AI. The journal impact factor should not be discarded. *J*  
52 718 *Korean Med Sci*. 2017;32(2):180-2.

- 1  
2  
3 719 76. Franceschini F, Galetto M, Maisano D, et al. The success-index: an alternative  
4 720 approach to the h-index for evaluating an individual's research output. *Scientometrics*.  
5 721 2012;92(3):621-41. doi:10.1007/s11192-011-0570-z  
6 722 77. Prathap G. Citation indices and dimensional homogeneity. *Curr Sci*. 2017;113(5):853-  
7 723 5.  
8 724 78. Saad G. Applying the h-index in exploring bibliometric properties of elite marketing  
9 725 scholars. *Scientometrics*. 2010;83(2):423-33. doi:10.1007/s11192-009-0069-z  
10 726 79. Duffy RD, Jadidian A, Webster GD, et al. The research productivity of academic  
11 727 psychologists: assessment, trends, and best practice recommendations. *Scientometrics*.  
12 728 2011;89(1):207-27. doi:10.1007/s11192-011-0452-4  
13 729 80. Prathap G. Evaluating journal performance metrics. *Scientometrics*. 2012;92(2):403-  
14 730 8. doi:10.1007/s11192-012-0746-1  
15 731 81. Lando T, Bertoli-Barsotti L. A new bibliometric index based on the shape of the  
16 732 citation distribution. *PLOS One*. 2014;9(12): doi: 10.1371/journal.pone.0115962.  
17 733 doi:10.1371/journal.pone.0115962  
18 734 82. Bornmann L, Wallon G, Ledin A. Is the h index related to (standard) bibliometric  
19 735 measures and to the assessments by peers? An investigation of the h index by using  
20 736 molecular life sciences data. *Res Eval*. 2008;17(2):149-56.  
21 737 doi:10.3152/095820208x319166  
22 738 83. Pepe A, Kurtz MJ. A measure of total research impact independent of time and  
23 739 discipline. *PLOS One*. 2012;7(11):e46428. doi:10.1371/journal.pone.0046428  
24 740 84. Haslam N, Laham S. Early-career scientific achievement and patterns of authorship:  
25 741 the mixed blessings of publication leadership and collaboration. *Res Eval*.  
26 742 2009;18(5):405-10. doi:10.3152/095820209x481075  
27 743 85. Ioannidis JPA, Klavans R, Boyack KW. Multiple citation indicators and their  
28 744 composite across scientific disciplines. *PLOS Biol*. 2016;14(7): doi:  
29 745 10.1371/journal.pbio.1002501. doi:10.1371/journal.pbio.1002501  
30 746 86. van Leeuwen T. Testing the validity of the Hirsch-index for research assessment  
31 747 purposes. *Res Eval*. 2008;17(2):157-60. doi:10.3152/095820208x319175  
32 748 87. Ouimet M, Bedard P-O, Gelineau F. Are the h-index and some of its alternatives  
33 749 discriminatory of epistemological beliefs and methodological preferences of faculty  
34 750 members? The case of social scientists in Quebec. *Scientometrics*. 2011;88(1):91-106.  
35 751 doi:10.1007/s11192-011-0364-3  
36 752 88. Kshetry VR, Benzel EC. Research productivity and fellowship training in  
37 753 neurosurgery. *World Neurosurg*. 2013;80(6):787-8. doi:10.1016/j.wneu.2013.10.005  
38 754 89. Biswal AK. An absolute index (Ab-index) to measure a researcher's useful  
39 755 contributions and productivity. *PLOS One*. 2013;8(12): doi:  
40 756 10.1371/journal.pone.0084334. doi:10.1371/journal.pone.0084334  
41 757 90. Tschudy MM, Rowe TL, Dover GJ, et al. Pediatric academic productivity: pediatric  
42 758 benchmarks for the h- and g-indices. *J Pediatr*. 2016;169:272-6.  
43 759 doi:10.1016/j.jpeds.2015.10.030  
44 760 91. Azer SA, Azer S. Bibliometric analysis of the top-cited gastroenterology and  
45 761 hepatology articles. *BMJ Open*. 2016;6(2): doi: 10.1136/bmjopen-2015-009889.  
46 762 doi:10.1136/bmjopen-2015-009889  
47 763 92. Joshi MA. Bibliometric indicators for evaluating the quality of scientific publications.  
48 764 *J Contemp Dent Pract*. 2014;15(2):258-62.  
49 765 93. Danielson J, McElroy S. Quantifying published scholarly works of experiential  
50 766 education directors. *Am J Pharm Edu*. 2013;77(8):167.  
51 767 94. Ion D, Andronic O, Bolocan A, et al. Tendencies on traditional metrics. *Chirurgia*  
52 768 (*Bucur*). 2017;112(2):117-23. doi:10.21614/chirurgia.112.2.117

- 1  
2  
3 769 95. Suiter AM, Moulaison HL. Supporting scholars: an analysis of academic library  
4 770 websites' documentation on metrics and impact. *J Acad Librariansh.* 2015;41(6):814-  
5 771 20. doi:10.1016/j.acalib.2015.09.004  
6 772 96. Butler JS, Kaye ID, Sebastian AS, et al. The evolution of current research impact  
7 773 metrics from bibliometrics to altmetrics? *Clin Spine Surg.* 2017;30(5):226-8.  
8 774 97. Krapivin M, Marchese M, Casati F. Exploring and understanding scientific metrics in  
9 775 citation networks. In: Zhou J, editor. *Complex Sciences, Pt 2. Lecture Notes of the*  
10 776 *Institute for Computer Sciences Social Informatics and Telecommunications*  
11 777 *Engineering.* 52009. p. 1550-63.  
12 778 98. Carpenter TA. Comparing digital apples to digital apples: background on niso's effort  
13 779 to build an infrastructure for new forms of scholarly assessment. *Inf Serv Use.*  
14 780 2014;34(1-2):103-6. doi:10.3233/isu-140739  
15 781 99. Gasparyan AY, Nurmashv B, Yessirkepov M, et al. The journal impact factor:  
16 782 moving toward an alternative and combined scientometric approach. *J Korean Med*  
17 783 *Sci* 2017;32(2):173-9. doi:10.3346/jkms.2017.32.2.173  
18 784 100. Moed HF, Halevi G. Multidimensional assessment of scholarly research impact. *J*  
19 785 *Assoc Inf Sci Technol.* 2015;66(10):1988-2002. doi:10.1002/asi.23314  
20 786 101. Chuang K-Y, Olaiya MT, Ho Y-S. Bibliometric analysis of the Polish Journal of  
21 787 *Environmental Studies (2000-11).* *Pol J Environ Stud.* 2012;21(5):1175-83.  
22 788 102. Vinyard M. Altmetrics: an overhyped fad or an important tool for evaluating scholarly  
23 789 output? *Computers in Libraries.* 2016;36(10):26-9.  
24 790 103. van Noorden R. A profusion of measures. *Nature.* 2010;465(7300):864-6.  
25 791 doi:10.1038/465864a  
26 792 104. van Noorden R. Love thy lab neighbour. *Nature.* 2010;468(7327):1011.  
27 793 doi:10.1038/4681011a  
28 794 105. Dinsmore A, Allen L, Dolby K. Alternative perspectives on impact: the potential of  
29 795 ALMs and altmetrics to inform funders about research impact. *PLOS Biol.*  
30 796 2014;12(11):e1002003. doi:10.1371/journal.pbio.1002003  
31 797 106. Cress PE. Using altmetrics and social media to supplement impact factor: maximizing  
32 798 your article's academic and societal impact. *Aesthet Surg J.* 2014;34(7):1123-6.  
33 799 doi:10.1177/1090820x14542973  
34 800 107. Moreira JAG, Zeng XHT, Amaral LAN. The distribution of the asymptotic number of  
35 801 citations to sets of publications by a researcher or from an academic department are  
36 802 consistent with a discrete lognormal model. *PLOS One.* 2015;10(11): doi:  
37 803 10.1371/journal.pone.0143108. doi:10.1371/journal.pone.0143108  
38 804 108. Waljee JF. Discussion: are quantitative measures of academic productivity correlated  
39 805 with academic rank in plastic surgery? A national study. *Plast Reconstr Surg.*  
40 806 2015;136(3):622-3. doi:10.1097/prs.0000000000001566  
41 807 109. Fazel S, Wolf A. What is the impact of a research publication? *Evid Based Ment*  
42 808 *Health.* 2017;20(2):33-4. doi:10.1136/eb-2017-102668  
43 809 110. Eysenbach G. Can tweets predict citations? Metrics of social impact based on Twitter  
44 810 and correlation with traditional metrics of scientific impact. *J Med Internet Res.*  
45 811 2011;13(4): doi: 10.2196/jmir.012. doi:10.2196/jmir.2012  
46 812 111. Hoffmann CP, Lutz C, Meckel M. Impact factor 2.0: applying social network analysis  
47 813 to scientific impact assessment. In: Sprague RH, editor. 2014 47th Hawaii  
48 814 International Conference on System Sciences. Proceedings of the Annual Hawaii  
49 815 International Conference on System Sciences 2014. p. 1576-85.  
50 816 112. Maggio LA, Meyer HS, Artino AR. Beyond citation rates: a real-time impact analysis  
51 817 of health professions education research using altmetrics. *Acad Med.*  
52 818 2017;92(10):1449-55. doi:10.1097/acm.0000000000001897



- 1  
2  
3 819 113. Raj A, Carr PL, Kaplan SE, et al. Longitudinal analysis of gender differences in  
4 820 academic productivity among medical faculty across 24 medical schools in the United  
5 821 States. *Acad Med*. 2016;91(8):1074-9. doi:10.1097/acm.0000000000001251  
6 822 114. Markel TA, Valsangkar NP, Bell TM, et al. Endangered academia: preserving the  
7 823 pediatric surgeon scientist. *J Pediatr Surg*. 2017;52(7):1079-83.  
8 824 doi:10.1016/j.jpedsurg.2016.12.006  
9 825 115. Mirnezami SR, Beaudry C, Lariviere V. What determines researchers' scientific  
10 826 impact? A case study of Quebec researchers. *Sci Public Policy*. 2016;43(2):262-74.  
11 827 doi:10.1093/scipol/scv038  
12 828 116. Napolitano LM. Scholarly activity requirements for critical care fellowship program  
13 829 directors: what should it be? How should we measure it? *Crit Care Med*.  
14 830 2016;44(12):2293-6. doi:10.1097/ccm.0000000000002120  
15 831 117. Bai X, Xia F, Lee I, et al. Identifying anomalous citations for objective evaluation of  
16 832 scholarly article impact. *PLOS One*. 2016;11(9): doi: 10.1371/journal.pone.0162364.  
17 833 doi:10.1371/journal.pone.0162364  
18 834 118. Gao C, Wang Z, Li X, et al. PR-Index: using the h-Index and PageRank for  
19 835 determining true impact. *PLOS One*. 2016;11(9): doi: 10.1371/journal.pone.0161755.  
20 836 doi:10.1371/journal.pone.0161755  
21 837 119. Assimakis N, Adam M. A new author's productivity index: p-index. *Scientometrics*.  
22 838 2010;85(2):415-27. doi:10.1007/s11192-010-0255-z  
23 839 120. Petersen AM, Succi S. The Z-index: a geometric representation of productivity and  
24 840 impact which accounts for information in the entire rank-citation profile. *J Informetr*.  
25 841 2013;7(4):823-32. doi:<https://doi.org/10.1016/j.joi.2013.07.003>  
26 842 121. Claro J, Costa CAV. A made-to-measure indicator for cross-disciplinary bibliometric  
27 843 ranking of researchers performance. *Scientometrics*. 2011;86(1):113-23.  
28 844 doi:10.1007/s11192-010-0241-5  
29 845 122. Sahoo BK, Singh R, Mishra B, et al. Research productivity in management schools of  
30 846 India during 1968-2015: a directional benefit-of-doubt model analysis. *Omega Int J*  
31 847 *Manage S*. 2017;66:118-39. doi:10.1016/j.omega.2016.02.004  
32 848 123. Aragon AM. A measure for the impact of research. *Sci Rep*. 2013;3: doi:  
33 849 10.1038/srep01649. doi:10.1038/srep01649  
34 850 124. Shibayama S, Baba Y. Impact-oriented science policies and scientific publication  
35 851 practices: the case of life sciences in Japan. *Res Policy*. 2015;44(4):936-50.  
36 852 doi:10.1016/j.respol.2015.01.012  
37 853 125. Tjldink JK, Schipper K, Bouter LM, et al. How do scientists perceive the current  
38 854 publication culture? A qualitative focus group interview study among Dutch  
39 855 biomedical researchers. *BMJ Open*. 2016;6(2): doi: 10.1136/bmjopen-2015-008681.  
40 856 doi:10.1136/bmjopen-2015-008681  
41 857 126. Crespo JA, Li Y, Ruiz-Castillo J. The measurement of the effect on citation inequality  
42 858 of differences in citation practices across scientific fields. *PLOS One*. 2013;8(3): doi:  
43 859 10.1371/journal.pone.0058727. doi:10.1371/journal.pone.0058727  
44 860 127. da Silva JAT. Does China need to rethink its metrics- and citation-based research  
45 861 rewards policies? *Scientometrics*. 2017;112(3):1853-7. doi:10.1007/s11192-017-  
46 862 2430-y  
47 863 128. Devos P. Research and bibliometrics: a long history. *Clin Res Hepatol Gastroenterol*.  
48 864 2011;35(5):336-7. doi:10.1016/j.clinre.2011.04.008  
49 865 129. Slyder JB, Stein BR, Sams BS, et al. Citation pattern and lifespan: a comparison of  
50 866 discipline, institution, and individual. *Scientometrics*. 2011;89(3):955-66.  
51 867 doi:10.1007/s11192-011-0467-x  
52  
53  
54  
55  
56  
57  
58  
59  
60

- 1  
2  
3 868 130. Zhou Y-B, Lu L, Li M. Quantifying the influence of scientists and their publications:  
4 869 distinguishing between prestige and popularity. *New J Phys*. 2012;14: doi:  
5 870 10.1088/367-2630/14/3/033033. doi:10.1088/367-2630/14/3/033033  
6 871 131. Sorensen AA, Weedon D. Productivity and impact of the top 100 cited Parkinson's  
7 872 disease investigators since 1985. *J Parkinsons Dis*. 2011;1(1):3-13. doi:10.3233/jpd-  
8 873 2011-10021  
9 874 132. Jeang K-T. H-index, mentoring-index, highly-cited and highly-accessed: how to  
10 875 evaluate scientists? *Retrovirology*. 2008;5(106). doi:10.1186/1742-4690-5-106  
11 876 133. Franceschini F, Maisano D. Publication and patent analysis of European researchers  
12 877 in the field of production technology and manufacturing systems. *Scientometrics*.  
13 878 2012;93(1):89-100. doi:10.1007/s11192-012-0648-2  
14 879 134. Sibbald SL, MacGregor JCD, Surmacz M, et al. Into the gray: a modified approach to  
15 880 citation analysis to better understand research impact. *J Med Libr Assoc*.  
16 881 2015;103(1):49-54. doi:10.3163/1536-5050.103.1.010  
17 882 135. Sutherland WJ, Goulson D, Potts SG, et al. Quantifying the impact and relevance of  
18 883 scientific research. *PLOS One*. 2011;6(11):e27537. doi:10.1371/journal.pone.0027537  
19 884 136. Nature Editorial Team. Announcement: Nature journals support the San Francisco  
20 885 Declaration on Research Assessment. *Nature*. 2017;544(7651):394.  
21 886 doi:10.1038/nature.2017.21882  
22 887 137. Pugh EN, Jr., Gordon SE. Embracing the principles of the San Francisco Declaration  
23 888 of Research Assessment: Robert Balaban's editorial. *J Gen Physiol*. 2013;142(3):175.  
24 889 doi:10.1085/jgp.201311077  
25 890 138. Zhang L, Rousseau R, Sivertsen G. Science deserves to be judged by its contents, not  
26 891 by its wrapping: revisiting Seglen's work on journal impact and research evaluation.  
27 892 *PLOS One*. 2017;12(3): doi: 10.1371/journal.pone.0174205.  
28 893 doi:10.1371/journal.pone.0174205  
29 894 139. San Francisco Declaration on Research Assessment (DORA). DORA—ASCB San  
30 895 Francisco, US2016 [Available from: <http://www.ascb.org/dora/>.  
31 896 140. Cabezas-Clavijo A, Delgado-Lopez-Cozar E. Google Scholar and the h-index in  
32 897 biomedicine: the popularization of bibliometric assessment. *Med Intensiva*.  
33 898 2013;37(5):343-54. doi:10.1016/j.medin.2013.01.008  
34 899 141. Iyengar R, Wang Y, Chow J, et al. An integrated approach to evaluate faculty  
35 900 members' research performance. *Acad Med*. 2009;84(11):1610-6.  
36 901 doi:10.1097/ACM.0b013e3181bb2364  
37 902 142. Jacso P. Eigenfactor and article influence scores in the journal citation reports. *Online*  
38 903 *Inform Rev*. 2010;34(2):339-48. doi:10.1108/14684521011037034  
39 904  
40  
41  
42  
43  
44  
45  
46 905  
47  
48  
49  
50  
51  
52  
53  
54  
55  
56  
57  
58  
59  
60

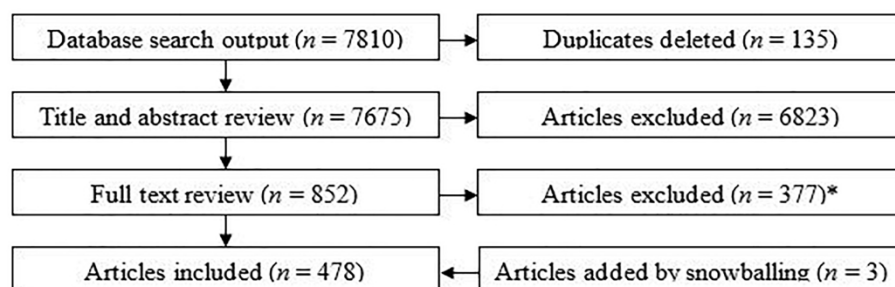

18 **\*Reasons for exclusion are noted below**

19  
20  
21  
22  
23  
24  
25  
26  
27

| Reason for exclusion at the full text level             | Number of articles excluded |
|---------------------------------------------------------|-----------------------------|
| Not in English language                                 | 47                          |
| Full text not available                                 | 62                          |
| Does not discuss assessment of an individual researcher | 268                         |
| <b>Total</b>                                            | <b>377</b>                  |

28 Data screening and extraction process for academic articles

29  
30 279x188mm (300 x 300 DPI)

1  
2  
3  
4  
5  
6  
7  
8  
9  
10  
11  
12  
13  
14  
15  
16  
17  
18  
19  
20  
21  
22  
23  
24  
25  
26  
27  
28  
29  
30  
31  
32  
33  
34  
35  
36  
37  
38  
39  
40  
41  
42  
43  
44  
45  
46  
47  
48  
49  
50  
51  
52  
53  
54  
55  
56  
57  
58  
59  
60

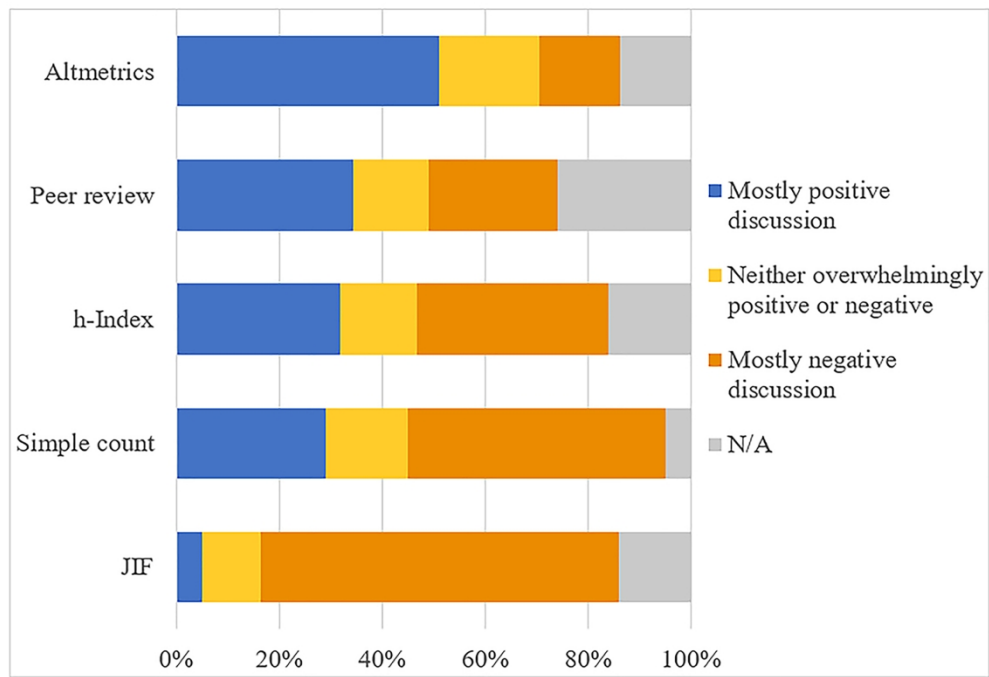

Percentages of positive and negative discussion regarding selected commonly used metrics for assessing individual researchers (n=478 articles)

279x191mm (300 x 300 DPI)



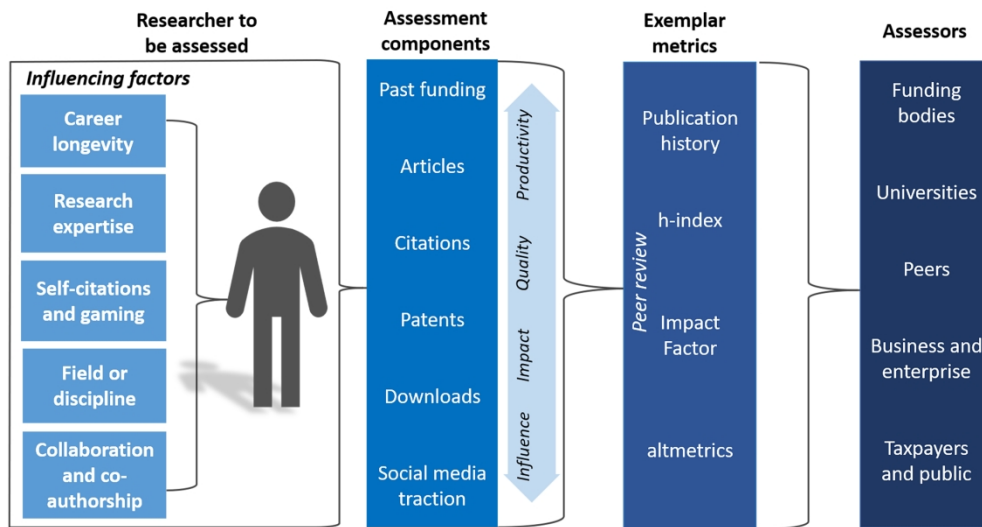

The Comprehensive Researcher Achievement Model (CRAM)

279x148mm (300 x 300 DPI)

Appendix 1: Full Search Strategy

|                                                                 |                                                                                                                                                                                                                                                                                                                                                                                                                                                                                    |                     |
|-----------------------------------------------------------------|------------------------------------------------------------------------------------------------------------------------------------------------------------------------------------------------------------------------------------------------------------------------------------------------------------------------------------------------------------------------------------------------------------------------------------------------------------------------------------|---------------------|
| <b>Name of database</b>                                         | Web of Science Core Collection, BIOSIS Citation Index, Medline                                                                                                                                                                                                                                                                                                                                                                                                                     |                     |
| <b>Platform</b>                                                 | Web of Science [Clarivate Analytics]                                                                                                                                                                                                                                                                                                                                                                                                                                               |                     |
| <b>Database coverage</b>                                        | 2007-2017                                                                                                                                                                                                                                                                                                                                                                                                                                                                          |                     |
| <b>Date exported to Reference Management Software (EndNote)</b> | 19 <sup>th</sup> October 2017                                                                                                                                                                                                                                                                                                                                                                                                                                                      |                     |
| <b>Search strategy</b>                                          | Model OR framework OR assess* OR evaluat*OR<br>*metric*OR measur* OR criteri*OR citation*OR<br>unconscious bias OR rank*                                                                                                                                                                                                                                                                                                                                                           | Results: 13,282,151 |
|                                                                 | AND                                                                                                                                                                                                                                                                                                                                                                                                                                                                                |                     |
|                                                                 | researcher excellence OR track record OR researcher<br>funding OR researcher perform* OR relative to opportunity<br>OR researcher potential OR research* career pathway OR<br>academic career pathway OR funding system OR funding<br>body OR researcher impact OR scientific* productivity OR<br>academic productivity OR top researcher OR researcher<br>ranking OR grant application OR researcher output OR<br>h*index OR i*index OR impact factor OR individual<br>researcher | Results: 11,616     |
|                                                                 | Combined sets [Auto select language based on search<br>language]                                                                                                                                                                                                                                                                                                                                                                                                                   | Results: 7,530      |

only

1  
2  
3  
4  
5  
6  
7  
8  
9  
10  
11  
12  
13  
14  
15  
16  
17  
18  
19  
20  
21  
22  
23  
24  
25  
26  
27  
28  
29  
30  
31  
32  
33  
34  
35  
36  
37  
38  
39  
40  
41  
42  
43  
44  
45  
46

1  
2  
3  
4  
5  
6  
7  
8  
9  
10  
11  
12  
13  
14  
15  
16  
17  
18  
19  
20  
21  
22  
23  
24  
25  
26  
27  
28  
29  
30  
31  
32  
33  
34  
35  
36  
37  
38  
39  
40  
41  
42  
43  
44  
45  
46

## Appendix 2: Summary table of included articles and the metrics or models they discuss

| Publication Details |      |                                             |         | Metric or Model Assessing an Individual's Research Achievement |               |         |     |       |             |     |
|---------------------|------|---------------------------------------------|---------|----------------------------------------------------------------|---------------|---------|-----|-------|-------------|-----|
| First author        | Year | Journal name                                | Format^ | Peer-review                                                    | Simple Counts | h-index | JIF | Other | Alt-metrics | New |
| Abramo              | 2016 | Scientometrics                              | ED      |                                                                |               |         |     | Y     |             |     |
| Agarwal             | 2016 | Asian Journal of Andrology                  | ED      |                                                                | Y             | Y       | Y   | Y     | Y           |     |
| Ahmad               | 2013 | Anesthesia and Analgesia                    | EM      |                                                                | Y             |         |     |       |             |     |
| Aixela              | 2015 | Perspectives: Studies in Translatology      | ED      | Y                                                              |               | Y       | Y   | Y     |             |     |
| Akl                 | 2012 | Canadian Medical Association Journal        | EM      | Y                                                              |               |         |     |       |             |     |
| Albion              | 2012 | Australian Educational Researcher           | EM      |                                                                |               | Y       | Y   | Y     |             |     |
| Alguliyev           | 2016 | Journal of Scientometric Research           | EM      |                                                                |               |         | Y   | Y     |             |     |
| Allen               | 2010 | ScienceAsia                                 | ED      |                                                                |               | Y       | Y   |       |             |     |
| Anderson            | 2008 | Scientometrics                              | ED      |                                                                |               | Y       |     |       |             | Y   |
| Anderson            | 2017 | Applied Economics                           | EM      | Y                                                              |               | Y       | Y   |       |             |     |
| Anfossi             | 2015 | International Journal of Dermatology        | EM      |                                                                |               |         | Y   |       |             |     |
| Antunes             | 2015 | Revista do Colegio Brasileiro de Cirurgioes | EM      | Y                                                              |               | Y       |     |       |             |     |
| Aoun                | 2013 | World Neurosurgery                          | RE      | Y                                                              |               | Y       | Y   |       |             |     |
| Aragon              | 2013 | Nature Scientific Reports                   | EM      |                                                                |               |         |     |       |             | Y   |
| Armado              | 2017 | Transinformação                             | EM      |                                                                |               | Y       |     | Y     |             |     |
| Assimakis           | 2010 | Scientometrics                              | EM      |                                                                |               |         |     |       |             | Y   |
| Azer                | 2016 | Education Forum                             |         |                                                                |               | Y       | Y   | Y     |             |     |
| Babineau            | 2014 | The Western Journal of Emergency Medicine   | EM      |                                                                |               | Y       |     |       |             |     |

1  
2  
3  
4  
5  
6  
7  
8  
9  
10  
11  
12  
13  
14  
15  
16  
17  
18  
19  
20  
21  
22  
23  
24  
25  
26  
27  
28  
29  
30  
31  
32  
33  
34  
35  
36  
37  
38  
39  
40  
41  
42  
43  
44  
45  
46

|                   |      |                                                   |    |   |   |   |   |   |   |
|-------------------|------|---------------------------------------------------|----|---|---|---|---|---|---|
| Baccini           | 2014 | Scientometrics                                    | EM |   |   | Y | Y | Y |   |
| Badar             | 2016 | Aslib Journal of Information Management           | EM | Y |   |   | Y |   |   |
| Bai               | 2016 | PLOS One                                          | EM |   | Y | Y | Y | Y | Y |
| Bala              | 2013 | Journal of Clinical Epidemiology                  | EM |   |   |   | Y |   |   |
| Balaban           | 2013 | Journal of General Physiology                     | ED | Y |   |   |   |   |   |
| Balandin          | 2009 | Augmentative and Alternative Communication        | ED |   |   | Y | Y |   |   |
| Barczynski        | 2009 | Journal of Human Kinetics                         | ED |   |   |   | Y | Y |   |
| Bastian           | 2017 | Journal of Bone and Joint Surgery-American Volume | EM |   |   | Y |   |   |   |
| Baum              | 2011 | SAGE                                              | EM | Y |   |   | Y |   |   |
| Beck              | 2017 | Research Evaluation                               | EM | Y |   |   |   |   |   |
| Beirlant          | 2010 | Scandinavian Journal of Statistics                | EM |   |   | Y |   |   |   |
| Belikov           | 2015 | f1000 Research                                    | EM |   |   |   | Y |   | Y |
| Bellini           | 2012 | The Lancet                                        | ED |   | Y | Y | Y |   |   |
| Belter            | 2015 | Journal of The Medical Library Association        | ED | Y |   | Y |   |   |   |
| Benchimol-Barbosa | 2011 | Arquivos Brasileiros de Cardiologia               | ED |   |   |   |   | Y |   |
| Benway            | 2009 | Urology                                           | ED | Y | Y | Y |   |   |   |
| Bertuzzi          | 2013 | Molecular Biology of the Cell                     | ED |   |   |   |   | Y |   |
| Bharathi          | 2013 | PLOS One                                          | ED |   |   |   | Y |   |   |
| Bini              | 2008 | Electronic Transactions on Numerical Analysis     | EM |   |   |   |   |   | Y |
| Birks             | 2014 | Health Services Research & Policy                 | EM | Y |   | Y |   |   |   |
| Biswal            | 2013 | PLOS One                                          | ED |   |   |   | Y |   | Y |
| Bloch             | 2016 | Research Evaluation                               | EM |   |   |   |   |   | Y |

|    |                 |      |                                          |    |   |   |   |   |   |   |
|----|-----------------|------|------------------------------------------|----|---|---|---|---|---|---|
| 1  |                 |      |                                          |    |   |   |   |   |   |   |
| 2  |                 |      |                                          |    |   |   |   |   |   |   |
| 3  | Bloching        | 2013 | South African Journal of Science         | EM | Y |   |   |   |   | Y |
| 4  |                 |      |                                          |    |   |   |   |   |   |   |
| 5  | Bollen          | 2016 | Scientometrics                           | ED | Y |   |   |   |   | Y |
| 6  |                 |      |                                          |    |   |   |   |   |   |   |
| 7  | Bolli           | 2014 | Circulation Research                     | ED |   |   |   |   |   |   |
| 8  |                 |      |                                          |    |   |   |   |   |   |   |
| 9  | Bornmann        | 2009 | EMBO Reports                             | ED |   |   |   | Y | Y |   |
| 10 |                 |      |                                          |    |   |   |   |   |   |   |
| 11 | Bornmann        | 2015 | Journal of Informetrics                  | EM | Y | Y | Y | Y | Y |   |
| 12 |                 |      |                                          |    |   |   |   |   |   |   |
| 13 | Bornmann        | 2016 | EMBO Reports                             | ED |   |   | Y | Y | Y |   |
| 14 |                 |      |                                          |    |   |   |   |   |   |   |
| 15 | Bornmann        | 2014 | Scientometrics                           | EM |   |   | Y | Y |   |   |
| 16 |                 |      |                                          |    |   |   |   |   |   |   |
| 17 | Bornmann        | 2008 | Research Evaluation                      | EM | Y | Y | Y | Y | Y | Y |
| 18 |                 |      |                                          |    |   |   |   |   |   |   |
| 19 | Bornmann        | 2017 | Journal of Informetrics                  | EM |   |   | Y | Y | Y | Y |
| 20 |                 |      |                                          |    |   |   |   |   |   |   |
| 21 | Bornmann        | 2017 | Journal of Korean Medical Science        | ED |   |   |   |   | Y | Y |
| 22 |                 |      |                                          |    |   |   |   |   |   |   |
| 23 | Bould           | 2011 | British Journal of Anaesthesia           | EM |   |   |   | Y |   |   |
| 24 |                 |      |                                          |    |   |   |   |   |   |   |
| 25 | Bradshaw        | 2016 | PLOS One                                 | EM |   |   | Y | Y | Y | Y |
| 26 |                 |      |                                          |    |   |   |   |   |   |   |
| 27 | Brown           | 2011 | American Journal of Occupational Therapy | ED |   |   |   | Y | Y | Y |
| 28 |                 |      |                                          |    |   |   |   |   |   |   |
| 29 | Buela-Casal     | 2012 | Scientometrics                           | EM |   |   |   |   | Y |   |
| 30 |                 |      |                                          |    |   |   |   |   |   |   |
| 31 | Buela-Casal     | 2010 | Revista de Psicodidáctica                | ED |   |   | Y | Y | Y | Y |
| 32 |                 |      |                                          |    |   |   |   |   |   |   |
| 33 | Butler          | 2017 | Clinical Spine Surgery                   | ED |   |   |   |   |   | Y |
| 34 |                 |      |                                          |    |   |   |   |   |   |   |
| 35 | Cabazas Clavijo | 2013 | Medicina Intensiva (English edition)     | RE |   |   | Y | Y | Y |   |
| 36 |                 |      |                                          |    |   |   |   |   |   |   |
| 37 | Cagan           | 2013 | Disease Models & Mechanisms              | ED |   |   |   |   | Y |   |
| 38 |                 |      |                                          |    |   |   |   |   |   |   |
| 39 | Callaway        | 2016 | Nature                                   | ED |   |   |   |   | Y |   |
| 40 |                 |      |                                          |    |   |   |   |   |   |   |
| 41 | Calver          | 2013 | Grumpy Scientists                        | ED |   |   | Y | Y | Y | Y |
| 42 |                 |      |                                          |    |   |   |   |   |   |   |
| 43 | Calver          | 2015 | Australian Universities Review           | ED |   |   |   |   |   | Y |
| 44 |                 |      |                                          |    |   |   |   |   |   |   |
| 45 | Caminiti        | 2015 | BMC Health Services Research             | RE |   |   |   |   |   | Y |
| 46 |                 |      |                                          |    |   |   |   |   |   |   |

|    |                     |      |                                                                        |    |   |   |   |   |   |
|----|---------------------|------|------------------------------------------------------------------------|----|---|---|---|---|---|
| 1  |                     |      |                                                                        |    |   |   |   |   |   |
| 2  |                     |      |                                                                        |    |   |   |   |   |   |
| 3  | Cantin              | 2015 | International Journal of Morphology                                    | EM |   |   | Y |   |   |
| 4  |                     |      |                                                                        |    |   |   |   |   |   |
| 5  | Carpenter           | 2014 | Academic Emergency Medicine                                            | ED |   |   | Y | Y | Y |
| 6  |                     |      |                                                                        |    |   |   |   |   |   |
| 7  | Carpenter           | 2014 | Information Service and Use                                            | ED |   |   |   | Y | Y |
| 8  |                     |      |                                                                        |    |   |   |   |   |   |
| 9  | Castelnuovo         | 2010 | Clinical Practice & Epidemiology in Mental Health                      | RE |   |   | Y | Y | Y |
| 10 |                     |      |                                                                        |    |   |   |   |   |   |
| 11 | Castillo            | 2010 | American Journal of Neuroradiology                                     | ED |   |   | Y |   | Y |
| 12 |                     |      |                                                                        |    |   |   |   |   |   |
| 13 | Chiari              | 2016 | Nurse Education Today                                                  | EM | Y |   |   |   |   |
| 14 |                     |      |                                                                        |    |   |   |   |   |   |
| 15 | Choi                | 2014 | Journal of Radiation Oncology                                          | EM | Y |   | Y |   | Y |
| 16 |                     |      |                                                                        |    |   |   |   |   |   |
| 17 | Choi                | 2009 | International Journal of Radiation Oncology, Biology, Physics          | EM |   | Y | Y |   |   |
| 18 |                     |      |                                                                        |    |   |   |   |   |   |
| 19 | Chopra              | 2016 | Aesthetic Surgery Journal                                              | EM |   |   | Y |   |   |
| 20 |                     |      |                                                                        |    |   |   |   |   |   |
| 21 | Choudhri            | 2015 | Radiographics                                                          | ED |   | Y | Y | Y |   |
| 22 |                     |      |                                                                        |    |   |   |   |   |   |
| 23 | Chowdhury           | 2015 | PLOS One                                                               | EM | Y |   | Y |   |   |
| 24 |                     |      |                                                                        |    |   |   |   |   |   |
| 25 | Christopher         | 2015 | Journal of Veterinary Cardiology                                       | ED |   |   |   | Y |   |
| 26 |                     |      |                                                                        |    |   |   |   |   |   |
| 27 | Chung               | 2012 | Scientometrics                                                         | EM |   |   |   |   | Y |
| 28 |                     |      |                                                                        |    |   |   |   |   |   |
| 29 | Ciriminna           | 2013 | Chemistry Central Journal                                              | ED |   | Y | Y | Y | Y |
| 30 |                     |      |                                                                        |    |   |   |   |   |   |
| 31 | Claro               | 2011 | Scientometrics                                                         | EM |   |   |   |   |   |
| 32 |                     |      |                                                                        |    |   |   |   |   |   |
| 33 | Cleary              | 2010 | International Journal of Mental Health Nursing                         | ED |   |   | Y |   |   |
| 34 |                     |      |                                                                        |    |   |   |   |   |   |
| 35 | Cone                | 2013 | Academic Emergency Medicine                                            | ED |   |   | Y |   |   |
| 36 |                     |      |                                                                        |    |   |   |   |   |   |
| 37 | Cone                | 2012 | Academic Emergency Medicine                                            | ED |   |   |   | Y |   |
| 38 |                     |      |                                                                        |    |   |   |   |   |   |
| 39 | Cordero-Villafafila | 2015 | Revista de Psiquiatría y Salud Mental (English Edition)                | ED |   |   | Y | Y | Y |
| 40 |                     |      |                                                                        |    |   |   |   |   |   |
| 41 | Costas              | 2011 | Scientometrics                                                         | EM |   | Y |   |   | Y |
| 42 |                     |      |                                                                        |    |   |   |   |   |   |
| 43 | Costas              | 2009 | Journal of the American Society for Information Science and Technology | EM |   | Y |   | Y |   |
| 44 |                     |      |                                                                        |    |   |   |   |   |   |
| 45 |                     |      |                                                                        |    |   |   |   |   |   |
| 46 |                     |      |                                                                        |    |   |   |   |   |   |

|    |                                   |      |                                                                           |    |   |   |   |   |   |
|----|-----------------------------------|------|---------------------------------------------------------------------------|----|---|---|---|---|---|
| 1  |                                   |      |                                                                           |    |   |   |   |   |   |
| 2  |                                   |      |                                                                           |    |   |   |   |   |   |
| 3  | Crespo                            | 2013 | PLOS One                                                                  | EM |   | Y | Y |   | Y |
| 4  |                                   |      |                                                                           |    |   |   |   |   |   |
| 5  | Cress                             | 2014 | Aesthetic Surgery Journal                                                 | ED |   |   |   | Y | Y |
| 6  |                                   |      |                                                                           |    |   |   |   |   |   |
| 7  | Crotty                            |      | European Heart Journal                                                    | ED |   |   | Y |   |   |
| 8  | Culley                            | 2014 | Anesthesia & Analgesia                                                    | EM |   | Y | Y | Y |   |
| 9  |                                   |      |                                                                           |    |   |   |   |   |   |
| 10 | Cynical Geographers<br>Collective | 2011 | Antipode                                                                  | ED |   | Y |   | Y |   |
| 11 |                                   |      |                                                                           |    |   |   |   |   |   |
| 12 | Czarnecki                         | 2013 | Bulletin of the Polish Academy of Sciences                                | EM |   |   | Y |   |   |
| 13 |                                   |      |                                                                           |    |   |   |   |   |   |
| 14 | da Silva                          | 2017 | Scientometrics                                                            | ED |   |   |   | Y | Y |
| 15 |                                   |      |                                                                           |    |   |   |   |   | Y |
| 16 | Danell                            | 2011 | Journal of the American Society for Information Science and<br>Technology | EM |   | Y |   |   |   |
| 17 |                                   |      |                                                                           |    |   |   |   |   |   |
| 18 | Danielson                         | 2013 | American Journal of Pharmaceutical Education                              | EM |   | Y | Y | Y |   |
| 19 |                                   |      |                                                                           |    |   |   |   |   |   |
| 20 | de Granda-Orive                   | 2014 | Archivos de Bronconeumología                                              | ED |   | Y |   | Y |   |
| 21 |                                   |      |                                                                           |    |   |   |   |   |   |
| 22 | De Gregori                        | 2016 | Journal of Pain Research                                                  | EM |   |   |   |   | Y |
| 23 |                                   |      |                                                                           |    |   |   |   |   |   |
| 24 | De la Flor-Martínez M             | 2017 | Medicina Oral Patología Oral Y Cirugía Bucal                              | EM | Y |   | Y |   |   |
| 25 |                                   |      |                                                                           |    |   |   |   |   |   |
| 26 | De Marchi                         | 2016 | Scientometrics                                                            | EM |   |   |   | Y |   |
| 27 |                                   |      |                                                                           |    |   |   |   |   |   |
| 28 | De Witte                          | 2010 | Scientometrics                                                            | EM | Y |   |   |   | Y |
| 29 |                                   |      |                                                                           |    |   |   |   |   |   |
| 30 | Delgadillo                        | 2016 | Family & Consumer Sciences research journal                               | RE |   |   | Y |   | Y |
| 31 |                                   |      |                                                                           |    |   |   |   |   |   |
| 32 | DeLuca                            | 2013 | Academic Emergency Medicine                                               | EM | Y |   | Y |   |   |
| 33 |                                   |      |                                                                           |    |   |   |   |   |   |
| 34 | Devos                             | 2011 | Clinics and Research in Hepatology and Gastroenterology                   | ED |   |   | Y |   |   |
| 35 |                                   |      |                                                                           |    |   |   |   |   |   |
| 36 | Diamandis                         | 2017 | BMC Medicine                                                              | ED |   |   |   | Y |   |
| 37 |                                   |      |                                                                           |    |   |   |   |   |   |
| 38 | DiBartola                         | 2017 | Journal of Veterinary Internal Medicine                                   | ED |   |   | Y | Y | Y |
| 39 |                                   |      |                                                                           |    |   |   |   |   |   |
| 40 | Diem                              | 2013 | Research in Higher Education                                              | EM |   |   | Y |   |   |
| 41 |                                   |      |                                                                           |    |   |   |   |   |   |
| 42 | Ding                              | 2011 | Information Processing and Management                                     | EM |   | Y | Y | Y | Y |
| 43 |                                   |      |                                                                           |    |   |   |   |   |   |
| 44 |                                   |      |                                                                           |    |   |   |   |   |   |
| 45 |                                   |      |                                                                           |    |   |   |   |   |   |
| 46 |                                   |      |                                                                           |    |   |   |   |   |   |

|    |             |      |                                                             |    |   |   |   |   |   |   |
|----|-------------|------|-------------------------------------------------------------|----|---|---|---|---|---|---|
| 1  |             |      |                                                             |    |   |   |   |   |   |   |
| 2  |             |      |                                                             |    |   |   |   |   |   |   |
| 3  |             |      | Journal of the American Society for Information Science and |    |   |   |   |   |   |   |
| 4  | Ding        | 2011 | Technology                                                  | EM |   |   | Y | Y |   | Y |
| 5  |             |      |                                                             |    |   |   |   |   |   |   |
| 6  | Diniz-Filho | 2016 | Journal of Informetrics                                     | EM | Y | Y |   | Y |   |   |
| 7  |             |      |                                                             |    |   |   |   |   |   |   |
| 8  | Dinsmore    | 2014 | PLOS Biology                                                | ED |   |   |   |   |   | Y |
| 9  |             |      |                                                             |    |   |   |   |   |   |   |
| 10 | Dodson      | 2012 | Biochemical and Biophysical Research Communications         | EM | Y |   | Y | Y |   | Y |
| 11 |             |      |                                                             |    |   |   |   |   |   |   |
| 12 | Donato      | 2014 | Revista Portuguesa De Pneumologia                           | ED |   |   |   | Y |   |   |
| 13 |             |      |                                                             |    |   |   |   |   |   |   |
| 14 | Doyle       | 2015 | Molecular Psychiatry                                        | EM | Y |   |   |   |   |   |
| 15 |             |      |                                                             |    |   |   |   |   |   |   |
| 16 | Duffy       | 2011 | Scientometrics                                              | EM |   | Y | Y |   | Y |   |
| 17 |             |      |                                                             |    |   |   |   |   |   |   |
| 18 | Duffy       | 2008 | Journal of Counseling Psychology                            | EM |   | Y | Y |   | Y | Y |
| 19 |             |      |                                                             |    |   |   |   |   |   |   |
| 20 | Durieux     | 2010 | Radiology                                                   | RE |   |   | Y | Y | Y | Y |
| 21 |             |      |                                                             |    |   |   |   |   |   |   |
| 22 | Ebadi       | 2016 | Scientometrics                                              | EM |   |   |   |   | Y | Y |
| 23 |             |      |                                                             |    |   |   |   |   |   |   |
| 24 | Eblen       | 2016 | PLOS One                                                    | EM | Y |   |   |   |   |   |
| 25 |             |      |                                                             |    |   |   |   |   |   |   |
| 26 | Efron       | 2011 | Clinical and Experimental Optometry                         | EM |   | Y | Y |   | Y |   |
| 27 |             |      |                                                             |    |   |   |   |   |   |   |
| 28 | Ekpo        | 2016 | Journal of Medical Imaging and Radiation Sciences           | EM |   |   | Y | Y | Y | Y |
| 29 |             |      |                                                             |    |   |   |   |   |   |   |
| 30 | El Emam     | 2012 | Journal of Medical Internet Research                        | EM |   | Y | Y | Y |   |   |
| 31 |             |      |                                                             |    |   |   |   |   |   |   |
| 32 | Ellson      | 2009 | Journal of Business Research                                | ED |   |   |   |   |   |   |
| 33 |             |      |                                                             |    |   |   |   |   |   |   |
| 34 | Eloy        | 2014 | Otolaryngology–Head and Neck Surgery                        | EM | Y |   | Y | Y | Y |   |
| 35 |             |      |                                                             |    |   |   |   |   |   |   |
| 36 | Eloy        | 2013 | Laryngoscope                                                | EM |   |   | Y |   |   |   |
| 37 |             |      |                                                             |    |   |   |   |   |   |   |
| 38 | Esposito    | 2010 | European Journal of Oral Implantology.                      | ED |   |   |   | Y |   |   |
| 39 |             |      |                                                             |    |   |   |   |   |   |   |
| 40 | Eyre-Walker | 2013 | PLOS Biology                                                | EM | Y | Y |   | Y |   |   |
| 41 |             |      |                                                             |    |   |   |   |   |   |   |
| 42 | Eysenbach   | 2011 | Journal of Medical Internet Research                        | EM |   | Y | Y | Y |   | Y |
| 43 |             |      |                                                             |    |   |   |   |   |   |   |
| 44 | Fabry       | 2017 | GMS Journal for Medical Education                           | ED | Y |   |   | Y |   | Y |
| 45 |             |      |                                                             |    |   |   |   |   |   |   |
| 46 |             |      |                                                             |    |   |   |   |   |   |   |



|               |      |                                                                          |    |   |   |   |   |   |   |
|---------------|------|--------------------------------------------------------------------------|----|---|---|---|---|---|---|
| Fang          | 2016 | eLIFE                                                                    | EM | Y |   |   |   |   |   |
| Fazel         | 2017 | Evidence-based Mental Health                                             | EM | Y |   |   | Y | Y |   |
| Fedderke      | 2015 | Research Policy                                                          | EM |   | Y | Y |   |   |   |
| Feethman      | 2015 | Veterinary Record                                                        | ED |   |   |   | Y |   |   |
| Ferrer-Sapena | 2016 | Research Evaluation                                                      | ED |   | Y |   | Y | Y | Y |
| Filler        | 2014 | Academic Medicine                                                        | EM |   |   |   | Y |   |   |
| Finch         | 2010 | Bioessays                                                                | ED |   |   | Y | Y | Y |   |
| Flaatten      | 2016 | Acta Anaesthesiologica Scandinavica                                      | ED |   |   | Y | Y |   |   |
| Franceschet   | 2010 | Journal of Informetrics                                                  | EM |   |   |   | Y | Y |   |
| Franceschini  | 2012 | Scientometrics                                                           | EM |   |   |   |   | Y | Y |
| Franceschini  | 2012 | Scientometrics                                                           | EM |   |   | Y | Y | Y | Y |
| Franceschini  | 2012 | Scientometrics                                                           | EM |   | Y | Y |   | Y |   |
| Frittelli     | 2016 | Journal of the Association for Information Science and Technology        | EM |   |   | Y | Y |   | Y |
| Frixione      | 2016 | PLOS One                                                                 | EM | Y |   |   |   |   | Y |
| Fujita        | 2017 | IEEE 41st Annual Computer Software and Applications Conference (COMPSAC) | EM | Y | Y |   |   |   |   |
| Gambadauro    | 2007 | European Journal of Obstetrics & Gynecology and Reproductive Biology     | ED |   |   |   | Y |   |   |
| Gao           | 2016 | PLOS One                                                                 | ED |   |   | Y |   |   | Y |
| Garcia-Perez  | 2015 | Scientometrics                                                           | EM |   | Y |   |   | Y |   |
| Garcia-Perez  | 2009 | Spanish Journal of Psychology                                            | EM |   | Y | Y |   |   |   |
| Garner        | 2017 | Journal of Neurointerventional Surgery                                   | RE |   | Y | Y |   |   |   |

|    |                    |      |                                                       |    |   |   |   |   |   |
|----|--------------------|------|-------------------------------------------------------|----|---|---|---|---|---|
| 1  |                    |      |                                                       |    |   |   |   |   |   |
| 2  |                    |      |                                                       |    |   |   |   |   |   |
| 3  | Gasparyan          | 2017 | Journal of Korean Medical Science                     | ED |   |   | Y | Y | Y |
| 4  |                    |      |                                                       |    |   |   |   |   |   |
| 5  | Gast               | 2014 | Plastic and Reconstructive Surgery                    | EM |   | Y | Y |   |   |
| 6  |                    |      |                                                       |    |   |   |   |   |   |
| 7  | Gast               | 2014 | Plastic & Reconstructive Surgery                      | EM |   |   | Y |   | Y |
| 8  |                    |      |                                                       |    |   |   |   |   |   |
| 9  | Gaughan            | 2008 | Research Evaluation                                   | EM |   |   |   |   | Y |
| 10 |                    |      |                                                       |    |   |   |   |   |   |
| 11 | Gefen              | 2011 | Journal of Biomechanics                               | LE | Y |   | Y |   |   |
| 12 |                    |      |                                                       |    |   |   |   |   |   |
| 13 | Giminez-Toledo     | 2016 | Scientometrics                                        | EM |   |   |   |   | Y |
| 14 |                    |      |                                                       |    |   |   |   |   |   |
| 15 | Glänzel            | 2014 | Transinformação                                       | ED |   |   | Y |   | Y |
| 16 |                    |      |                                                       |    |   |   |   |   |   |
| 17 | Good               | 2015 | Research Evaluation                                   | ED |   |   |   |   | Y |
| 18 |                    |      |                                                       |    |   |   |   |   |   |
| 19 | Gorraiz            | 2010 | LIBER Quarterly                                       | ED |   | Y |   | Y | Y |
| 20 |                    |      |                                                       |    |   |   |   |   |   |
| 21 | Gracza             | 2008 | Library Collections Acquisitions & Technical Services | ED |   |   | Y | Y |   |
| 22 |                    |      |                                                       |    |   |   |   |   |   |
| 23 | Grisso             | 2017 | Journal of Women's Health                             | EM | Y |   |   |   |   |
| 24 |                    |      |                                                       |    |   |   |   |   |   |
| 25 | Grzybowski         | 2017 | Clinics in Dermatology                                | ED |   |   |   |   | Y |
| 26 |                    |      |                                                       |    |   |   |   |   |   |
| 27 | Gumpenberger       | 2016 | Scientometrics.                                       | ED | Y |   | Y | Y | Y |
| 28 |                    |      |                                                       |    |   |   |   |   |   |
| 29 | Haddad             | 2014 | The Bone and Joint Journal                            | ED |   |   |   | Y |   |
| 30 |                    |      |                                                       |    |   |   |   |   |   |
| 31 | Haddow             | 2015 | Research Evaluation                                   | EM |   |   |   |   |   |
| 32 |                    |      |                                                       |    |   |   |   |   |   |
| 33 | Haeffner-Cavaillon | 2009 | Archivum Immunologiae et Therapiae Experimentalis     | ED | Y |   | Y | Y | Y |
| 34 |                    |      |                                                       |    |   |   |   |   |   |
| 35 | Halbach            | 2011 | Annals of Anatomy                                     | EM |   | Y | Y |   | Y |
| 36 |                    |      |                                                       |    |   |   |   |   |   |
| 37 | Hall               | 2015 | Tourism Management                                    | ED |   |   |   | Y |   |
| 38 |                    |      |                                                       |    |   |   |   |   |   |
| 39 | Halvorson          | 2016 | Implications for Training in the Health Professions   | EM |   | Y | Y |   |   |
| 40 |                    |      |                                                       |    |   |   |   |   |   |
| 41 | Hamidreza          | 2013 | Acta Informatica Medica                               | EM |   |   | Y |   |   |
| 42 |                    |      |                                                       |    |   |   |   |   |   |
| 43 | Hammarfelt         | 2017 | Research Evaluation                                   | EM | Y |   | Y | Y |   |
| 44 |                    |      |                                                       |    |   |   |   |   |   |
| 45 | Han                | 2013 | ISSI                                                  | EM | Y |   |   | Y | Y |
| 46 |                    |      |                                                       |    |   |   |   |   |   |

|    |           |      |                                                                                         |    |   |   |   |   |     |
|----|-----------|------|-----------------------------------------------------------------------------------------|----|---|---|---|---|-----|
| 1  |           |      |                                                                                         |    |   |   |   |   |     |
| 2  |           |      |                                                                                         |    |   |   |   |   |     |
| 3  | Han       | 2010 | Journal of Animal and Veterinary Advances                                               | EM |   |   | Y | Y |     |
| 4  |           |      |                                                                                         |    |   |   |   |   |     |
| 5  | Haslam    | 2009 | Research Evaluation                                                                     | EM |   | Y | Y | Y |     |
| 6  |           |      |                                                                                         |    |   |   |   |   |     |
| 7  | Haslam    | 2010 | European Journal of Social Psychology                                                   | EM |   |   | Y | Y | Y Y |
| 8  |           |      |                                                                                         |    |   |   |   |   |     |
| 9  | Healy     | 2011 | Breast Cancer Research and Treatment                                                    | EM |   |   | Y |   |     |
| 10 |           |      |                                                                                         |    |   |   |   |   |     |
| 11 | Heinzl    | 2012 | AIP Conference Proceedings                                                              | ED |   |   | Y | Y | Y   |
| 12 |           |      |                                                                                         |    |   |   |   |   |     |
| 13 | Henrekson | 2011 | The Manchester School                                                                   | EM |   | Y | Y | Y | Y   |
| 14 |           |      |                                                                                         |    |   |   |   |   |     |
| 15 | Herteliu  | 2017 | Publications                                                                            | EM |   |   | Y |   |     |
| 16 |           |      |                                                                                         |    |   |   |   |   |     |
| 17 | Hew       | 2017 | Telematics and Informatics                                                              | EM |   | Y | Y | Y |     |
| 18 |           |      |                                                                                         |    |   |   |   |   |     |
| 19 | Hicks     | 2015 | Nature                                                                                  | ED |   |   | Y | Y |     |
| 20 |           |      |                                                                                         |    |   |   |   |   |     |
| 21 | Hicks     | 2015 | Nature                                                                                  | ED |   |   | Y | Y |     |
| 22 |           |      |                                                                                         |    |   |   |   |   |     |
| 23 | Hoffman   | 2014 | 47th Hawaii International Conference on System Sciences                                 | O  |   |   | Y | Y | Y   |
| 24 |           |      |                                                                                         |    |   |   |   |   |     |
| 25 | Holliday  | 2010 | International Journal of General Medicine                                               | EM | Y |   |   | Y | Y   |
| 26 |           |      |                                                                                         |    |   |   |   |   |     |
| 27 | Houser    | 2017 | Leukos                                                                                  | ED |   |   | Y | Y |     |
| 28 |           |      |                                                                                         |    |   |   |   |   |     |
| 29 | Hughes    | 2015 | International Journal of Radiation Oncology Biology Physics<br>NB Conference supplement | EM |   | Y | Y |   |     |
| 30 |           |      |                                                                                         |    |   |   |   |   |     |
| 31 | Hunt      | 2011 | Acta Neuropsychiatrica                                                                  | ED |   |   | Y | Y |     |
| 32 |           |      |                                                                                         |    |   |   |   |   |     |
| 33 | Hutchins  | 2016 | PLOS Biology                                                                            | EM |   |   |   |   | Y   |
| 34 |           |      |                                                                                         |    |   |   |   |   |     |
| 35 | Hyman     | 2014 | Molecular Biology of the Cell                                                           | ED |   |   |   |   |     |
| 36 |           |      |                                                                                         |    |   |   |   |   |     |
| 37 | Ibrahim   | 2015 | New Library World                                                                       | EM | Y | Y | Y |   | Y   |
| 38 |           |      |                                                                                         |    |   |   |   |   |     |
| 39 | Ioannidis | 2016 | PLOS Biology                                                                            | EM |   | Y | Y |   | Y   |
| 40 |           |      |                                                                                         |    |   |   |   |   |     |
| 41 | Ion       | 2017 | Chirurgia                                                                               | RE |   |   | Y | Y | Y   |
| 42 |           |      |                                                                                         |    |   |   |   |   |     |
| 43 | Iyendar   | 2009 | Academic Medicine                                                                       | EM |   |   |   | Y | Y   |
| 44 |           |      |                                                                                         |    |   |   |   |   |     |
| 45 |           |      |                                                                                         |    |   |   |   |   |     |
| 46 |           |      |                                                                                         |    |   |   |   |   |     |

1  
2  
3  
4  
5  
6  
7  
8  
9  
10  
11  
12  
13  
14  
15  
16  
17  
18  
19  
20  
21  
22  
23  
24  
25  
26  
27  
28  
29  
30  
31  
32  
33  
34  
35  
36  
37  
38  
39  
40  
41  
42  
43  
44  
45  
46

|         |      |                                                                                           |    |   |   |   |     |
|---------|------|-------------------------------------------------------------------------------------------|----|---|---|---|-----|
| Jackson | 2015 | Medical Journal of Australia                                                              | ED | Y |   |   |     |
| Jackson | 2011 | PLOS One                                                                                  | EM |   |   |   | Y   |
| Jacob   | 2007 | Scientometrics                                                                            | EM |   | Y |   | Y   |
| Jacso   | 2010 | Online Information Review                                                                 | EM |   |   |   | Y Y |
| Jacso   | 2008 | Online Information Review                                                                 | ED |   |   | Y |     |
| Jalil   | 2013 | IEEE International Conference on Teaching, Assessment and Learning for Engineering (TALE) | EM |   |   |   | Y   |
| Jamjoom | 2015 | Neurosciences                                                                             | EM |   |   | Y |     |
| Jamjoom | 2016 | World Neurosurgery                                                                        | EM |   |   | Y |     |
| Jan     | 2016 | Journal of Scientometric Research                                                         | EM |   |   | Y | Y   |
| Javey   | 2012 | American Chemical Society                                                                 | ED |   |   | Y | Y   |
| Jeang   | 2008 | Retrovirology                                                                             | ED |   |   | Y | Y   |
| Jokic   | 2009 | Biochemia Medica                                                                          | ED |   | Y | Y | Y   |
| Joshi   | 2014 | The Journal of Contemporary Dental Practice                                               | ED |   |   | Y | Y   |
| Joykson | 2015 | f1000 Research                                                                            | EM |   |   |   |     |
| Kaatz   | 2015 | Academic Medicine                                                                         | EM | Y |   |   |     |
| Kaatz   | 2016 | Academic Medicine                                                                         | EM | Y |   |   |     |
| Kali    | 2015 | Indian Journal of Pharmacology                                                            | ED |   | Y |   | Y   |
| Kalra   | 2013 | Journal of Neurosurgery-Pediatrics                                                        | EM |   |   | Y | Y   |
| Kaltman | 2014 | Circulation Research                                                                      | EM |   | Y |   |     |
| Kapoor  | 2013 | The Annals of Medical and Health Sciences Research                                        | ED |   |   |   | Y   |
| Kellner | 2008 | Anais Da Academia Brasileira De Ciencias                                                  | EM |   |   | Y |     |

|    |             |      |                                                                        |    |   |   |   |   |     |
|----|-------------|------|------------------------------------------------------------------------|----|---|---|---|---|-----|
| 1  |             |      |                                                                        |    |   |   |   |   |     |
| 2  |             |      |                                                                        |    |   |   |   |   |     |
| 3  | Khan        | 2013 | World Neurology                                                        | EM |   |   | Y |   |     |
| 4  |             |      |                                                                        |    |   |   |   |   |     |
| 5  | Knudson     | 2015 | Quest                                                                  | EM |   | Y |   |   |     |
| 6  |             |      |                                                                        |    |   |   |   |   |     |
| 7  | Kosmulski   | 2012 | Research Evaluation                                                    | ED |   | Y |   | Y |     |
| 8  |             |      |                                                                        |    |   |   |   |   |     |
| 9  | Krapivin    | 2009 | Complex Sciences                                                       | EM |   | Y | Y |   | Y Y |
| 10 |             |      |                                                                        |    |   |   |   |   |     |
| 11 | Kreiman     | 2011 | Frontiers in Computational Neuroscience                                | ED | Y | Y |   | Y | Y   |
| 12 |             |      |                                                                        |    |   |   |   |   |     |
| 13 | Kreines     | 2016 | Journal of Computer and Systems Sciences International                 | EM |   |   |   |   | Y   |
| 14 |             |      |                                                                        |    |   |   |   |   |     |
| 15 | Kshetry     | 2013 | World Neurosurgery                                                     | ED |   |   | Y | Y |     |
| 16 |             |      |                                                                        |    |   |   |   |   |     |
| 17 | Kulasagareh | 2010 | European Archives of Oto-Rhino-Laryngology                             | EM |   |   | Y |   |     |
| 18 |             |      |                                                                        |    |   |   |   |   |     |
| 19 | Kulczycki   | 2017 | Journal of Informetrics                                                | ED |   |   | Y |   |     |
| 20 |             |      |                                                                        |    |   |   |   |   |     |
| 21 | Kumar       | 2009 | Iete Technical Review                                                  | ED |   | Y | Y | Y |     |
| 22 |             |      |                                                                        |    |   |   |   |   |     |
| 23 | Kuo         | 2017 | Computers in Human Behavior                                            | EM |   |   |   |   | Y   |
| 24 |             |      |                                                                        |    |   |   |   |   |     |
| 25 | Lando       | 2014 | PLOS One                                                               | EM |   | Y | Y |   | Y   |
| 26 |             |      |                                                                        |    |   |   |   |   |     |
| 27 | Lariviere   | 2010 | Journal of the American Society for Information Science and Technology | EM |   |   |   | Y |     |
| 28 |             |      |                                                                        |    |   |   |   |   |     |
| 29 | Lariviere   | 2016 | PLOS One                                                               | EM |   | Y |   |   |     |
| 30 |             |      |                                                                        |    |   |   |   |   |     |
| 31 | Lariviere   | 2011 | Journal of Informetrics                                                | EM |   |   |   | Y |     |
| 32 |             |      |                                                                        |    |   |   |   |   |     |
| 33 | Lauer       | 2015 | The New England Journal of Medicine                                    | ED | Y |   |   |   |     |
| 34 |             |      |                                                                        |    |   |   |   |   |     |
| 35 | Law         | 2013 | Asia Pacific Journal of Tourism Research                               | EM | Y | Y |   | Y |     |
| 36 |             |      |                                                                        |    |   |   |   |   |     |
| 37 | Lee         | 2009 | Journal of neurosurgery                                                | EM |   |   | Y |   |     |
| 38 |             |      |                                                                        |    |   |   |   |   |     |
| 39 | Leff        | 2009 | International Journal of COPD                                          | ED |   |   |   | Y |     |
| 40 |             |      |                                                                        |    |   |   |   |   |     |
| 41 | Leydesdorff | 2016 | Scientometrics                                                         | ED |   |   | Y | Y | Y   |
| 42 |             |      |                                                                        |    |   |   |   |   |     |
| 43 | Li          | 2015 | Science                                                                | EM | Y |   |   |   |     |
| 44 |             |      |                                                                        |    |   |   |   |   |     |
| 45 |             |      |                                                                        |    |   |   |   |   |     |
| 46 |             |      |                                                                        |    |   |   |   |   |     |

1  
2  
3  
4  
5  
6  
7  
8  
9  
10  
11  
12  
13  
14  
15  
16  
17  
18  
19  
20  
21  
22  
23  
24  
25  
26  
27  
28  
29  
30  
31  
32  
33  
34  
35  
36  
37  
38  
39  
40  
41  
42  
43  
44  
45  
46

In: Nah FFH, Tan CH, eds. Hci in Business, Government, and Organizations: Ecommerce and Innovation, Pt I. Vol 97512016:61-71.

|            |      |                                                                                                                               |    |   |   |   |   |   |
|------------|------|-------------------------------------------------------------------------------------------------------------------------------|----|---|---|---|---|---|
| Li         | 2016 | In: Nah FFH, Tan CH, eds. Hci in Business, Government, and Organizations: Ecommerce and Innovation, Pt I. Vol 97512016:61-71. | EM | Y |   |   |   |   |
| Liang      | 2015 | IEEE International Conference on Smart City/SocialCom/SustainCom                                                              | EM |   |   |   |   | Y |
| Liao       | 2011 | Decision Support Systems                                                                                                      | EM |   | Y |   | Y |   |
| Lindner    | 2015 | PLOS One                                                                                                                      | EM | Y | Y |   |   |   |
| Lindner    | 2016 | American Journal of Evaluation                                                                                                | EM | Y |   |   |   |   |
| Lippi      | 2009 | Clinical Chemistry and Laboratory Medicine                                                                                    | ED |   |   | Y | Y |   |
| Lippi      | 2013 | Clinica Chimica Acta                                                                                                          | EM |   |   | Y | Y |   |
| Lippi      | 2017 | Annals of Translational Medicine                                                                                              | EM |   |   | Y | Y | Y |
| Lissoni    | 2011 | Industrial and Corporate Change                                                                                               | EM |   |   |   | Y |   |
| Littman    | 2017 | Medical Education Online                                                                                                      | EM |   | Y | Y | Y |   |
| Liu        | 2011 | Management Information Systems                                                                                                | EM |   | Y |   | Y | Y |
| Lopez      | 2015 | Journal of Surgical Education                                                                                                 | EM | Y |   | Y |   |   |
| Lopez      | 2015 | Journal of Hand Surgery America                                                                                               | EM |   | Y | Y |   |   |
| Lortie     | 2013 | Scientometrics                                                                                                                | EM |   | Y |   | Y |   |
| Lovegrove  | 2008 | BioScience                                                                                                                    | EM | Y |   | Y |   | Y |
| Lozano     | 2017 | Current Science                                                                                                               | ED |   | Y | Y |   | Y |
| MacMasters | 2017 | Academic Psychiatry                                                                                                           | EM |   | Y | Y |   |   |
| Maggio     | 2017 | Academic Medicine                                                                                                             | EM |   |   | Y |   | Y |
| Mali       | 2017 | Science & Public Policy                                                                                                       | EM |   |   |   |   |   |
| Markel     | 2017 | Journal of Pediatric Surgery                                                                                                  | EM |   | Y | Y |   | Y |

|    |            |      |                                                                        |    |   |   |   |   |   |
|----|------------|------|------------------------------------------------------------------------|----|---|---|---|---|---|
| 1  |            |      |                                                                        |    |   |   |   |   |   |
| 2  |            |      |                                                                        |    |   |   |   |   |   |
| 3  | Markpin    | 2008 | Scientometrics                                                         | EM |   |   | Y |   | Y |
| 4  |            |      |                                                                        |    |   |   |   |   |   |
| 5  | Marsh      | 2008 | American Psychologist                                                  | EM | Y |   |   |   |   |
| 6  |            |      |                                                                        |    |   |   |   |   |   |
| 7  | Marshall   | 2017 | Otolaryngology—Head and Neck Surgery                                   | EM |   |   | Y |   |   |
| 8  |            |      |                                                                        |    |   |   |   |   |   |
| 9  | Marzolla   | 2016 | Journal of Informetrics                                                | EM | Y |   | Y | Y |   |
| 10 |            |      |                                                                        |    |   |   |   |   |   |
| 11 | Mas-Bleder | 2013 | Scientometrics                                                         | EM |   | Y |   | Y |   |
| 12 |            |      |                                                                        |    |   |   |   |   |   |
| 13 | Matsas     | 2012 | Brazilian Journal of Physics                                           | EM |   |   |   |   | Y |
| 14 |            |      |                                                                        |    |   |   |   |   |   |
| 15 | Maunder    | 2007 | La Revue Canadienne de Psychiatrie                                     | EM |   |   | Y | Y | Y |
| 16 |            |      |                                                                        |    |   |   |   |   |   |
| 17 | Maximin    | 2014 | RadioGraphics                                                          | ED | Y | Y | Y |   | Y |
| 18 |            |      |                                                                        |    |   |   |   |   |   |
| 19 | Mazlounian | 2011 | PLOS One                                                               | EM |   |   |   |   | Y |
| 20 |            |      |                                                                        |    |   |   |   |   |   |
| 21 | Mazmanian  | 2014 | Evaluation & the Health Professions                                    | RE |   |   |   | Y |   |
| 22 |            |      |                                                                        |    |   |   |   |   |   |
| 23 | McAlister  | 2011 | American Heart Association Journals                                    | ED |   | Y | Y |   |   |
| 24 |            |      |                                                                        |    |   |   |   |   |   |
| 25 | McGovern   | 2013 | Academic Medicine                                                      | EM | Y | Y |   | Y |   |
| 26 |            |      |                                                                        |    |   |   |   |   |   |
| 27 | Medo       | 2016 | Physical Review                                                        | EM |   |   | Y | Y |   |
| 28 |            |      |                                                                        |    |   |   |   |   |   |
| 29 | Meho       | 2008 | Journal of the American Society for Information Science and Technology | EM |   | Y | Y |   |   |
| 30 |            |      |                                                                        |    |   |   |   |   |   |
| 31 | Mester     | 2016 | Interdisciplinary Description of Complex Systems                       | ED |   | Y | Y | Y |   |
| 32 |            |      |                                                                        |    |   |   |   |   |   |
| 33 | Metcalf    | 2010 | Radiologic Technology                                                  | EM |   |   |   |   |   |
| 34 |            |      |                                                                        |    |   |   |   |   |   |
| 35 | Milone     | 2016 | American Journal of Orthopedics                                        | EM | Y |   | Y |   | Y |
| 36 |            |      |                                                                        |    |   |   |   |   |   |
| 37 | Minasny    | 2013 | PeerJ                                                                  | EM |   | Y | Y |   |   |
| 38 |            |      |                                                                        |    |   |   |   |   |   |
| 39 | Mingers    | 2015 | European Journal of Operational Research                               | ED |   | Y | Y | Y |   |
| 40 |            |      |                                                                        |    |   |   |   |   |   |
| 41 | Mingers    | 2009 | Journal of the Operational Research Society                            | EM |   | Y | Y |   |   |
| 42 |            |      |                                                                        |    |   |   |   |   |   |
| 43 | Mingers    | 2017 | Scientometrics                                                         | EM |   | Y |   |   |   |
| 44 |            |      |                                                                        |    |   |   |   |   |   |
| 45 |            |      |                                                                        |    |   |   |   |   |   |
| 46 |            |      |                                                                        |    |   |   |   |   |   |

1  
2  
3  
4  
5  
6  
7  
8  
9  
10  
11  
12  
13  
14  
15  
16  
17  
18  
19  
20  
21  
22  
23  
24  
25  
26  
27  
28  
29  
30  
31  
32  
33  
34  
35  
36  
37  
38  
39  
40  
41  
42  
43  
44  
45  
46

|                         |      |                                                                        |    |   |   |   |   |   |   |
|-------------------------|------|------------------------------------------------------------------------|----|---|---|---|---|---|---|
| Mirnezami               | 2016 | Science and Public Policy                                              | EM |   | Y |   |   | Y |   |
| Misteli                 | 2013 | The Journal of Cell Biology                                            | ED |   |   |   | Y |   |   |
| Moed                    | 2015 | Journal of the Association for Information Science and Technology      | RE |   |   |   |   |   | Y |
| Moed                    | 2009 | Archivum Immunologiae et Therapia Experimentalis                       | ED |   |   | Y | Y | Y |   |
| Mooij                   | 2014 | Scientometrics                                                         | EM |   |   |   |   | Y | Y |
| Moppett                 | 2011 | British Journal of Anaesthesia                                         | EM | Y | Y | Y |   | Y | Y |
| Moreira                 | 2015 | PLOS One                                                               | EM |   |   | Y | Y |   | Y |
| Morel                   | 2009 | PLOS Neglected Tropic Diseases                                         | EM |   |   | Y |   |   | Y |
| Moustafa                | 2016 | Accountability in Research-Policies and Quality Assurance              | ED |   | Y |   |   |   |   |
| Murphy                  | 2011 | Irish Journal of Medical Science                                       | EM |   | Y |   | Y |   |   |
| Murphy                  | 2017 | Nature                                                                 | ED |   |   |   |   | Y |   |
| Mutz                    | 2015 | Journal of the Association for Information Science and Technology      | EM | Y |   |   |   |   |   |
| Mutz                    | 2012 | Zeitschrift fur Psychologie                                            | EM | Y |   |   |   |   |   |
| Nah                     | 2009 | Journal of The American Society for Information Science and Technology | EM |   |   |   | Y | Y |   |
| Napolitano              | 2016 | Critical Care Medicine                                                 | ED |   | Y |   |   | Y |   |
| Nature Editorial Office | 2013 | Nature Letters                                                         | ED |   | Y |   | Y |   |   |
| Nature Editorial Office | 2017 | Nature                                                                 | ED |   |   |   | Y |   |   |
| Neufeld                 | 2011 | Research Evaluation                                                    | EM | Y |   | Y |   |   |   |
| Neylon                  | 2009 | PLOS Biology                                                           | ED |   | Y |   | Y |   |   |



|    |                 |      |                                                         |    |   |   |   |   |   |   |
|----|-----------------|------|---------------------------------------------------------|----|---|---|---|---|---|---|
| 1  |                 |      |                                                         |    |   |   |   |   |   |   |
| 2  |                 |      |                                                         |    |   |   |   |   |   |   |
| 3  | Nicol           | 2007 | Medical Journal of Australia                            | EM | Y | Y |   | Y |   |   |
| 4  |                 |      |                                                         |    |   |   |   |   |   |   |
| 5  | Nicolini        | 2008 | Scientometrics                                          | EM |   |   |   | Y | Y |   |
| 6  |                 |      |                                                         |    |   |   |   |   |   |   |
| 7  | Niederkröthaler | 2011 | BMC Public Health                                       | EM |   |   |   |   |   | Y |
| 8  |                 |      |                                                         |    |   |   |   |   |   |   |
| 9  | Nielsen         | 2017 | Studies in Higher Education                             | EM |   |   |   | Y | Y |   |
| 10 |                 |      |                                                         |    |   |   |   |   |   |   |
| 11 | Nigam           | 2012 | Indian Journal of Dermatology, Venerology and Leprology | ED |   |   |   | Y |   |   |
| 12 |                 |      |                                                         |    |   |   |   |   |   |   |
| 13 | Nightingale     | 2013 | Nurse Education in Practice                             | EM |   | Y | Y | Y |   | Y |
| 14 |                 |      |                                                         |    |   |   |   |   |   |   |
| 15 | Nosek           | 2010 | Personality and Social Psychology Bulletin              | EM |   |   |   | Y |   | Y |
| 16 |                 |      |                                                         |    |   |   |   |   |   |   |
| 17 | Nykl            | 2015 | Journal of Informetrics                                 | EM | Y |   |   | Y | Y |   |
| 18 |                 |      |                                                         |    |   |   |   |   |   |   |
| 19 | O'Brien         | 2012 | Oikos                                                   | ED |   |   |   |   |   |   |
| 20 |                 |      |                                                         |    |   |   |   |   |   |   |
| 21 | O'Connor        | 2010 | European Journal of Cancer Care                         | ED |   |   |   | Y | Y |   |
| 22 |                 |      |                                                         |    |   |   |   |   |   |   |
| 23 | Okhovati        | 2016 | Global Journal of Health Science                        | EM | Y | Y | Y | Y | Y |   |
| 24 |                 |      |                                                         |    |   |   |   |   |   |   |
| 25 | Oliveira        | 2013 | Revista Paulista de Pediatria                           | EM |   | Y | Y | Y | Y |   |
| 26 |                 |      |                                                         |    |   |   |   |   |   |   |
| 27 | Oliveira        | 2011 | Arquivos Brasileiros de Cardiologia                     | EM |   | Y | Y | Y |   |   |
| 28 |                 |      |                                                         |    |   |   |   |   |   |   |
| 29 | Oliveira        | 2013 | Scientometrics                                          | EM |   | Y | Y | Y | Y |   |
| 30 |                 |      |                                                         |    |   |   |   |   |   |   |
| 31 | Opthof          | 2009 | Netherlands Heart Journal                               | EM |   |   |   | Y | Y |   |
| 32 |                 |      |                                                         |    |   |   |   |   |   |   |
| 33 | Orduna-Malea    | 2015 | El Profesional de la Información                        | ED | Y | Y | Y | Y |   | Y |
| 34 |                 |      |                                                         |    |   |   |   |   |   |   |
| 35 | Osterloh        | 2015 | Evaluation Review                                       | EM | Y | Y |   | Y |   |   |
| 36 |                 |      |                                                         |    |   |   |   |   |   |   |
| 37 | Quimet          | 2011 | Scientometrics                                          | EM |   |   |   | Y |   | Y |
| 38 |                 |      |                                                         |    |   |   |   |   |   |   |
| 39 | Pagani          | 2015 | Scientometrics                                          | RE |   | Y |   | Y |   | Y |
| 40 |                 |      |                                                         |    |   |   |   |   |   |   |
| 41 | Pagel           | 2011 | British Journal of Anaesthesia                          | EM |   |   |   | Y |   |   |
| 42 |                 |      |                                                         |    |   |   |   |   |   |   |
| 43 | Pagel           | 2011 | Anaesthesia                                             | EM |   |   |   | Y |   | Y |
| 44 |                 |      |                                                         |    |   |   |   |   |   |   |
| 45 | Pagel           | 2015 | Original Investigations in Education                    | EM |   | Y | Y |   | Y |   |
| 46 |                 |      |                                                         |    |   |   |   |   |   |   |

|    |               |      |                                                      |    |   |   |   |   |   |   |
|----|---------------|------|------------------------------------------------------|----|---|---|---|---|---|---|
| 1  |               |      |                                                      |    |   |   |   |   |   |   |
| 2  |               |      |                                                      |    |   |   |   |   |   |   |
| 3  | Paik          | 2014 | Surgical Education                                   | EM |   |   | Y |   |   |   |
| 4  |               |      |                                                      |    |   |   |   |   |   |   |
| 5  | Pan           | 2014 | Science Reports                                      | EM |   |   | Y | Y |   | Y |
| 6  |               |      |                                                      |    |   |   |   |   |   |   |
| 7  | Pandit        | 2011 | Anaesthesia                                          | ED |   | Y | Y |   | Y |   |
| 8  |               |      |                                                      |    |   |   |   |   |   |   |
| 9  | Patel         | 2013 | Journal of the Royal Society of Medicine             | EM | Y | Y | Y | Y | Y | Y |
| 10 |               |      |                                                      |    |   |   |   |   |   |   |
| 11 | Patel         | 2011 | Journal of the Royal Society of Medicine             | RE |   | Y | Y | Y | Y |   |
| 12 |               |      |                                                      |    |   |   |   |   |   |   |
| 13 | Patrow        | 2011 | Journal of Postgraduate Medicine                     | ED |   |   | Y |   |   |   |
| 14 |               |      |                                                      |    |   |   |   |   |   |   |
| 15 | Pepe          | 2012 | PLOS One                                             | EM |   |   | Y |   |   | Y |
| 16 |               |      |                                                      |    |   |   |   |   |   |   |
| 17 | Pereyra-Rojas | 2017 | Frontiers in Psychology                              | EM | Y |   | Y |   | Y |   |
| 18 |               |      |                                                      |    |   |   |   |   |   |   |
| 19 | Perlin        | 2017 | Journal of Informetrics                              | EM |   | Y |   | Y |   |   |
| 20 |               |      |                                                      |    |   |   |   |   |   |   |
| 21 | Persson       | 2014 | Acta Physiologica                                    | ED |   |   |   |   |   | Y |
| 22 |               |      |                                                      |    |   |   |   |   |   |   |
| 23 | Peters        | 2017 | Journal of Infometrics                               | ED |   |   |   | Y |   |   |
| 24 |               |      |                                                      |    |   |   |   |   |   |   |
| 25 | Petersen      | 2013 | Journal of Informetrics                              | EM |   |   |   |   |   | Y |
| 26 |               |      |                                                      |    |   |   |   |   |   |   |
| 27 | Petersen      | 2010 | Physical Review                                      | EM |   |   |   |   |   |   |
| 28 |               |      |                                                      |    |   |   |   |   |   |   |
| 29 | Pinnock       | 2012 | Nurse Education Today                                | ED |   | Y |   | Y |   |   |
| 30 |               |      |                                                      |    |   |   |   |   |   |   |
| 31 | Pöder         | 2017 | Trames-Journal of the Humanities and Social Sciences | EM |   |   |   | Y |   | Y |
| 32 |               |      |                                                      |    |   |   |   |   |   |   |
| 33 | Prabhu        | 2017 | World Neurosurgery                                   | ED |   |   |   | Y | Y | Y |
| 34 |               |      |                                                      |    |   |   |   |   |   |   |
| 35 | Prathap       | 2016 | Scientometrics                                       | EM |   | Y |   | Y |   |   |
| 36 |               |      |                                                      |    |   |   |   |   |   |   |
| 37 | Prathap       | 2012 | Scientometrics                                       | EM |   |   |   | Y | Y | Y |
| 38 |               |      |                                                      |    |   |   |   |   |   |   |
| 39 | Prathap       | 2014 | Scientometrics                                       | EM |   |   |   | Y |   | Y |
| 40 |               |      |                                                      |    |   |   |   |   |   |   |
| 41 | Prathap       | 2017 | Current Science                                      | ED |   | Y | Y | Y |   | Y |
| 42 |               |      |                                                      |    |   |   |   |   |   |   |
| 43 | Pringle       | 2008 | Learned Publishing                                   | ED |   | Y | Y | Y | Y |   |
| 44 |               |      |                                                      |    |   |   |   |   |   |   |
| 45 | Pshetizky     | 2009 | Journal of the American Board of Family Medicine     | EM |   | Y |   | Y |   |   |
| 46 |               |      |                                                      |    |   |   |   |   |   |   |

|    |                   |      |                                                                                 |    |   |   |   |   |   |
|----|-------------------|------|---------------------------------------------------------------------------------|----|---|---|---|---|---|
| 1  |                   |      |                                                                                 |    |   |   |   |   |   |
| 2  |                   |      |                                                                                 |    |   |   |   |   |   |
| 3  | Pugh Jr           | 2013 | Journal of General Physiology                                                   | ED |   |   |   | Y |   |
| 4  |                   |      |                                                                                 |    |   |   |   |   |   |
| 5  | Pulina            | 2007 | Italian Journal of Animal Science                                               | EM |   | Y | Y | Y | Y |
| 6  |                   |      |                                                                                 |    |   |   |   |   |   |
| 7  | Pyke              | 2015 | BioScience                                                                      | ED |   |   |   |   | Y |
| 8  |                   |      |                                                                                 |    |   |   |   |   |   |
| 9  | Qi                | 2016 | Scientometrics                                                                  | EM |   | Y |   |   |   |
| 10 |                   |      |                                                                                 |    |   |   |   |   |   |
| 11 | Quigley           | 2012 | Journal of Cancer Education                                                     | EM |   |   | Y |   |   |
| 12 |                   |      |                                                                                 |    |   |   |   |   |   |
| 13 | Rad               | 2012 | Academic Radiology                                                              | EM |   |   | Y |   |   |
| 14 |                   |      |                                                                                 |    |   |   |   |   |   |
| 15 | Radicchi          | 2008 | Proceedings of the National Academy of Sciences of the United States of America | EM |   | Y | Y |   | Y |
| 16 |                   |      |                                                                                 |    |   |   |   |   |   |
| 17 | Radicchi          | 2012 | Journal of Informetrics                                                         | EM |   | Y |   |   | Y |
| 18 |                   |      |                                                                                 |    |   |   |   |   |   |
| 19 | Raj               | 2016 | Academic Medicine                                                               | EM |   | Y | Y |   | Y |
| 20 |                   |      |                                                                                 |    |   |   |   |   |   |
| 21 | Ramasesha         | 2011 | Current Science                                                                 | ED |   | Y | Y | Y | Y |
| 22 |                   |      |                                                                                 |    |   |   |   |   |   |
| 23 | Rana              | 2013 | Journal of Cancer Education                                                     | EM |   | Y | Y |   |   |
| 24 |                   |      |                                                                                 |    |   |   |   |   |   |
| 25 | Ravenscroft       | 2017 | PLOS One                                                                        | EM |   |   | Y | Y | Y |
| 26 |                   |      |                                                                                 |    |   |   |   |   |   |
| 27 | Rey-Rocha         | 2015 | Scientometrics                                                                  | EM |   | Y |   |   |   |
| 28 |                   |      |                                                                                 |    |   |   |   |   |   |
| 29 | Rezek             | 2011 | Academic Radiology                                                              | EM |   |   |   |   |   |
| 30 |                   |      |                                                                                 |    |   |   |   |   |   |
| 31 | Ribas             | 2015 | Proceedings of the 24th International Conference on World Wide Web              | O  | Y | Y | Y |   | Y |
| 32 |                   |      |                                                                                 |    |   |   |   |   |   |
| 33 | Ribas             | 2015 | arXiv                                                                           | ED |   |   |   |   | Y |
| 34 |                   |      |                                                                                 |    |   |   |   |   |   |
| 35 | Ricker            | 2009 | Interciencia                                                                    | ED | Y |   |   | Y | Y |
| 36 |                   |      |                                                                                 |    |   |   |   |   |   |
| 37 | Rieder            | 2010 | Langenbeck's Archives of Surgery                                                | ED |   |   | Y |   | Y |
| 38 |                   |      |                                                                                 |    |   |   |   |   |   |
| 39 | Robinson          | 2011 | Journal of School Psychology                                                    | ED |   |   |   | Y |   |
| 40 |                   |      |                                                                                 |    |   |   |   |   |   |
| 41 | Rodriguez-Navarro | 2011 | PLOS One                                                                        | EM |   |   |   |   | Y |
| 42 |                   |      |                                                                                 |    |   |   |   |   |   |
| 43 | Ronai             | 2012 | Pigment Cell and Melanoma research                                              | ED | Y | Y |   |   |   |
| 44 |                   |      |                                                                                 |    |   |   |   |   |   |
| 45 |                   |      |                                                                                 |    |   |   |   |   |   |
| 46 |                   |      |                                                                                 |    |   |   |   |   |   |

|    |               |      |                                                |    |   |   |   |   |   |
|----|---------------|------|------------------------------------------------|----|---|---|---|---|---|
| 1  |               |      |                                                |    |   |   |   |   |   |
| 2  |               |      |                                                |    |   |   |   |   |   |
| 3  | Rons          | 2009 | Research Evaluation                            | EM |   |   |   |   |   |
| 4  |               |      |                                                |    |   |   |   |   |   |
| 5  | Rosati        | 2016 | Journal of Cardiac Surgery                     | EM |   | Y |   |   |   |
| 6  |               |      |                                                |    |   |   |   |   |   |
| 7  | Ruane         | 2009 | Scientometrics                                 | EM |   | Y | Y |   | Y |
| 8  |               |      |                                                |    |   |   |   |   |   |
| 9  | Saad          | 2010 | Scientometrics                                 | EM |   |   | Y |   |   |
| 10 |               |      |                                                |    |   |   |   |   |   |
| 11 | Safdar        | 2015 | Society for Academic Emergency Medicine (SAEM) | EM | Y |   |   |   |   |
| 12 |               |      |                                                |    |   |   |   |   |   |
| 13 | Sahel         | 2011 | Science Translational Medicine                 | ED |   | Y | Y | Y |   |
| 14 |               |      |                                                |    |   |   |   |   |   |
| 15 | Sahoo         | 2017 | Omega                                          | EM |   | Y | Y | Y | Y |
| 16 |               |      |                                                |    |   |   |   |   |   |
| 17 | Saleem        | 2011 | Internal Archives of Medicine                  | ED |   |   | Y | Y |   |
| 18 |               |      |                                                |    |   |   |   |   |   |
| 19 | Sangam        | 2008 | Current Science                                | ED |   |   | Y | Y |   |
| 20 |               |      |                                                |    |   |   |   |   |   |
| 21 | Santangelo    | 2017 | Molecular Biology of the Cell                  | ED |   |   |   | Y | Y |
| 22 |               |      |                                                |    |   |   |   |   |   |
| 23 | Saraykar      | 2017 | Academic Psychiatry                            | EM |   |   | Y |   |   |
| 24 |               |      |                                                |    |   |   |   |   |   |
| 25 | Sarli         | 2016 | Missouri Medicine                              | ED |   |   |   | Y | Y |
| 26 |               |      |                                                |    |   |   |   |   | Y |
| 27 | Satyanarayana | 2008 | Indian Journal of Medical Research             | ED |   |   | Y | Y |   |
| 28 |               |      |                                                |    |   |   |   |   |   |
| 29 | Saxena        | 2013 | Journal of Pharmacology Pharmacotherapeutics   | EM |   |   | Y | Y | Y |
| 30 |               |      |                                                |    |   |   |   |   | Y |
| 31 | Sebire        | 2008 | Ultrasound in Obstetrics and Gynaecology       | ED |   |   | Y |   | Y |
| 32 |               |      |                                                |    |   |   |   |   | Y |
| 33 | Selek         | 2014 | Scientometrics                                 | EM |   | Y | Y |   | Y |
| 34 |               |      |                                                |    |   |   |   |   |   |
| 35 | Seo           | 2017 | Management Decision                            | EM |   |   |   | Y |   |
| 36 |               |      |                                                |    |   |   |   |   |   |
| 37 | Shanta        | 2013 | Journal of Medical Physics                     | ED |   | Y | Y | Y |   |
| 38 |               |      |                                                |    |   |   |   |   |   |
| 39 | Shibayama     | 2015 | Research Policy                                | EM |   | Y |   | Y |   |
| 40 |               |      |                                                |    |   |   |   |   |   |
| 41 | Sibbald       | 2015 | Journal of the Medical Library Association     | ED |   |   |   |   | Y |
| 42 |               |      |                                                |    |   |   |   |   |   |
| 43 | Simons        | 2008 | Science                                        | ED |   |   |   | Y |   |
| 44 |               |      |                                                |    |   |   |   |   |   |
| 45 | Sittig        | 2015 | MEDINFO 2015: eHealth-enabled Health           | EM |   | Y | Y |   | Y |
| 46 |               |      |                                                |    |   |   |   |   |   |

|    |                  |      |                                                                                 |    |   |   |   |   |   |
|----|------------------|------|---------------------------------------------------------------------------------|----|---|---|---|---|---|
| 1  |                  |      |                                                                                 |    |   |   |   |   |   |
| 2  |                  |      |                                                                                 |    |   |   |   |   |   |
| 3  | Slim             | 2017 | Anaesthesia, Critical Care & Pain Medicine                                      | ED |   | Y | Y |   | Y |
| 4  |                  |      |                                                                                 |    |   |   |   |   |   |
| 5  | Slyder           | 2011 | Scientometrics                                                                  | EM |   | Y |   |   |   |
| 6  |                  |      |                                                                                 |    |   |   |   |   |   |
| 7  | Smeyers          | 2011 | Journal of Philosophy of Education                                              | ED |   | Y |   | Y |   |
| 8  |                  |      |                                                                                 |    |   |   |   |   |   |
| 9  | Smith            | 2008 | Bone & Joint Journal                                                            | ED |   |   |   | Y |   |
| 10 |                  |      |                                                                                 |    |   |   |   |   |   |
| 11 | Soares de Araujo | 2011 | Revista Brasileira de Medicina do Esporte                                       | EM |   |   | Y | Y | Y |
| 12 |                  |      |                                                                                 |    |   |   |   |   |   |
| 13 | Sobhy            | 2016 | Embo Reports                                                                    | ED |   |   |   | Y |   |
| 14 |                  |      |                                                                                 |    |   |   |   |   |   |
| 15 | Sobkowicz        | 2015 | Journal of Artificial Societies and Social Simulation                           | EM | Y |   |   |   |   |
| 16 |                  |      |                                                                                 |    |   |   |   |   |   |
| 17 | Solarino         | 2012 | Annals of Geophysics                                                            | RE |   | Y | Y | Y | Y |
| 18 |                  |      |                                                                                 |    |   |   |   |   |   |
| 19 | Sood             | 2015 | Eplasty                                                                         | EM |   |   | Y |   |   |
| 20 |                  |      |                                                                                 |    |   |   |   |   |   |
| 21 | Sorenson         | 2011 | Journal of Parkinson's Disease                                                  | EM |   | Y | Y |   | Y |
| 22 |                  |      |                                                                                 |    |   |   |   |   |   |
| 23 | Spaan            | 2009 | Medical & Biological Engineering & Computing                                    | ED |   |   | Y | Y |   |
| 24 |                  |      |                                                                                 |    |   |   |   |   |   |
| 25 | Spearman         | 2010 | Journal of Neurosurgery                                                         | EM |   |   |   | Y |   |
| 26 |                  |      |                                                                                 |    |   |   |   |   |   |
| 27 | Spreckelsen      | 2011 | BMC Medical Informatics and Decision Making                                     | EM |   |   | Y | Y | Y |
| 28 |                  |      |                                                                                 |    |   |   |   |   |   |
| 29 | Staller          | 2017 | Qualitative Social Work                                                         | ED |   | Y | Y |   | Y |
| 30 |                  |      |                                                                                 |    |   |   |   |   |   |
| 31 | Stallings        | 2013 | Proceedings of the National Academy of Sciences of the United States of America | EM |   | Y | Y |   | Y |
| 32 |                  |      |                                                                                 |    |   |   |   |   |   |
| 33 | Street           | 2009 | Health Research Policy and System                                               | EM | Y |   |   |   |   |
| 34 |                  |      |                                                                                 |    |   |   |   |   |   |
| 35 | Stroebe          | 2010 | American Psychologist                                                           | ED |   | Y |   |   | Y |
| 36 |                  |      |                                                                                 |    |   |   |   |   |   |
| 37 | Stroobants       | 2013 | Nature                                                                          | ED |   |   |   |   |   |
| 38 |                  |      |                                                                                 |    |   |   |   |   |   |
| 39 | Sturmer          | 2013 | Revista Brasileira De Fisioterapia                                              | EM |   | Y | Y |   |   |
| 40 |                  |      |                                                                                 |    |   |   |   |   |   |
| 41 | Suiter           | 2015 | The Journal of Academic Librarianship                                           | EM |   |   | Y | Y | Y |
| 42 |                  |      |                                                                                 |    |   |   |   |   |   |
| 43 | Suminski         | 2012 | The Journal of the American Osteopathic Association                             | EM |   | Y |   | Y | Y |
| 44 |                  |      |                                                                                 |    |   |   |   |   |   |
| 45 |                  |      |                                                                                 |    |   |   |   |   |   |
| 46 |                  |      |                                                                                 |    |   |   |   |   |   |

1  
2  
3  
4  
5  
6  
7  
8  
9  
10  
11  
12  
13  
14  
15  
16  
17  
18  
19  
20  
21  
22  
23  
24  
25  
26  
27  
28  
29  
30  
31  
32  
33  
34  
35  
36  
37  
38  
39  
40  
41  
42  
43  
44  
45  
46

|                  |      |                                              |    |   |   |   |   |   |   |   |
|------------------|------|----------------------------------------------|----|---|---|---|---|---|---|---|
| Surla            | 2017 | The Electronic Library                       | ED |   | Y |   | Y |   |   | Y |
| Susarla          | 2015 | Plastic and Reconstructive surgery           | EM |   | Y | Y |   |   |   |   |
| Susarla          | 2015 | Journal of Dental Education                  | EM | Y |   | Y |   |   |   |   |
| Sutherland       | 2011 | PLOS One                                     | EM | Y |   |   | Y |   |   |   |
| Svider           | 2013 | Laryngoscope                                 | EM |   |   |   | Y |   |   |   |
| Svider           | 2014 | Ophthalmology                                | EM | Y |   |   | Y |   |   |   |
| Svider           | 2013 | Laryngoscope                                 | EM | Y |   |   | Y |   |   |   |
| Svider           | 2013 | Laryngoscope                                 | EM |   |   |   | Y |   | Y |   |
| Swanson          | 2016 | Annals of Plastic Surgery                    | EM |   |   |   | Y |   |   |   |
| Szklo            | 2008 | Epidemiology                                 | ED |   |   |   |   | Y |   |   |
| Szymanski        | 2012 | Information Sciences                         | EM |   |   |   | Y | Y | Y | Y |
| Taborsky         | 2007 | International Journal of Behavioural Biology | ED | Y |   |   |   |   |   |   |
| Tan              | 2016 | The Annals of Applied Statistics             | EM |   | Y | Y | Y |   | Y | Y |
| Tandon           | 2015 | National Academy Science Letters-India       | ED |   |   |   |   | Y |   |   |
| Taylor           | 2015 | Poultry Science                              | ED |   |   |   | Y | Y |   | Y |
| Teixeira         | 2013 | PLOS One                                     | EM |   |   |   | Y |   |   |   |
| Tenreiro Machado | 2017 | Entropy                                      | EM | Y |   |   |   |   | Y |   |
| Thelwall         | 2017 | Aslib Journal of Information Management      | EM |   |   |   |   |   |   | Y |
| Therattil        | 2016 | Annals of Plastic Surgery                    | EM |   |   |   | Y |   |   |   |
| Thomaz           | 2011 | Arquivos Brasileiros De Cardiologia          | ED |   |   |   | Y | Y | Y |   |
| Thorngate        | 2014 | Advances in Social Simulation                | EM | Y |   |   |   |   |   |   |
| Tijdink          | 2016 | BMJ Open                                     | EM |   |   |   |   |   |   |   |

|    |                   |      |                                                                                 |    |   |   |   |   |   |
|----|-------------------|------|---------------------------------------------------------------------------------|----|---|---|---|---|---|
| 1  |                   |      |                                                                                 |    |   |   |   |   |   |
| 2  |                   |      |                                                                                 |    |   |   |   |   |   |
| 3  | Timothy           | 2015 | Tourism Management                                                              | ED |   |   |   | Y |   |
| 4  |                   |      |                                                                                 |    |   |   |   |   |   |
| 5  | Torrisi           | 2014 | Scientometrics                                                                  | EM | Y |   | Y | Y | Y |
| 6  |                   |      |                                                                                 |    |   |   |   |   |   |
| 7  | Tricco            | 2017 | PLOS One                                                                        | RE | Y |   |   |   |   |
| 8  |                   |      |                                                                                 |    |   |   |   |   |   |
| 9  | Trueger           | 2015 | Annals of Emergency Medicine                                                    | ED |   |   | Y | Y | Y |
| 10 |                   |      |                                                                                 |    |   |   |   |   |   |
| 11 | Tschudy           | 2016 | Journal of Pediatrics                                                           | EM |   |   | Y |   | Y |
| 12 |                   |      |                                                                                 |    |   |   |   |   |   |
| 13 | Tse               | 2008 | Nature                                                                          | ED |   |   | Y | Y | Y |
| 14 |                   |      |                                                                                 |    |   |   |   |   |   |
| 15 | Tuitt             | 2011 | Canadian Journal of Gastroenterology                                            | EM |   |   | Y | Y | Y |
| 16 |                   |      |                                                                                 |    |   |   |   |   |   |
| 17 | Usmani            | 2011 | Sudanese Journal of Paediatrics                                                 | ED |   |   | Y | Y |   |
| 18 |                   |      |                                                                                 |    |   |   |   |   |   |
| 19 | Valsangkar        | 2016 | Surgery                                                                         | EM |   | Y | Y |   | Y |
| 20 |                   |      |                                                                                 |    |   |   |   |   |   |
| 21 | van Arensbergen   | 2012 | Higher Education Policy                                                         | EM | Y |   |   |   |   |
| 22 |                   |      |                                                                                 |    |   |   |   |   |   |
| 23 | van den Besselaar | 2009 | Research Evaluation                                                             | EM | Y | Y |   |   |   |
| 24 |                   |      |                                                                                 |    |   |   |   |   |   |
| 25 | van Eck           | 2013 | PLOS One                                                                        | EM |   | Y |   |   |   |
| 26 |                   |      |                                                                                 |    |   |   |   |   |   |
| 27 | van Leeuwen       | 2008 | Research Evaluation                                                             | EM |   |   | Y |   |   |
| 28 |                   |      |                                                                                 |    |   |   |   |   |   |
| 29 | van Leeuwen       | 2012 | Research Evaluation                                                             | EM | Y |   |   |   |   |
| 30 |                   |      |                                                                                 |    |   |   |   |   |   |
| 31 | van Noorden       | 2010 | Nature                                                                          | ED |   |   | Y | Y | Y |
| 32 |                   |      |                                                                                 |    |   |   |   |   |   |
| 33 | van Wesel         | 2016 | Science and Engineering Ethics                                                  | EM |   |   |   |   |   |
| 34 |                   |      |                                                                                 |    |   |   |   |   |   |
| 35 | Vaughan           | 2017 | Scientometrics                                                                  | EM |   |   |   |   | Y |
| 36 |                   |      |                                                                                 |    |   |   |   |   |   |
| 37 | Verma             | 2015 | Proceedings of the National Academy of Sciences of the United States of America | ED | Y |   |   | Y |   |
| 38 |                   |      |                                                                                 |    |   |   |   |   |   |
| 39 | Vico              | 2015 | Prometheus                                                                      | EM | Y |   |   |   |   |
| 40 |                   |      |                                                                                 |    |   |   |   |   |   |
| 41 | Vieira            | 2011 | Scientometrics                                                                  | EM |   |   |   |   | Y |
| 42 |                   |      |                                                                                 |    |   |   |   |   |   |
| 43 | Vinkler           | 2012 | Journal of Informetrics                                                         | ED |   |   |   | Y |   |
| 44 |                   |      |                                                                                 |    |   |   |   |   |   |
| 45 |                   |      |                                                                                 |    |   |   |   |   |   |
| 46 |                   |      |                                                                                 |    |   |   |   |   |   |

1  
2  
3  
4  
5  
6  
7  
8  
9  
10  
11  
12  
13  
14  
15  
16  
17  
18  
19  
20  
21  
22  
23  
24  
25  
26  
27  
28  
29  
30  
31  
32  
33  
34  
35  
36  
37  
38  
39  
40  
41  
42  
43  
44  
45  
46

|              |      |                                                                                                                                                  |    |   |   |   |   |   |   |
|--------------|------|--------------------------------------------------------------------------------------------------------------------------------------------------|----|---|---|---|---|---|---|
| Vinyard      | 2016 | Computers in libraries                                                                                                                           | ED |   |   | Y | Y |   | Y |
| von Bartheld | 2015 | PeerJ                                                                                                                                            | EM |   |   | Y | Y | Y |   |
| Wacogne      | 2016 | Archives of Disease in Childhood-Education and Practice Edition                                                                                  | ED |   |   | Y | Y | Y | Y |
| Wagner       | 2012 | Research Evaluation                                                                                                                              | ED |   | Y |   |   |   | Y |
| Waisbren     | 2008 | Journal of Women's Health                                                                                                                        | EM |   |   |   |   |   |   |
| Walijee      | 2015 | Plastic and Reconstructive Surgery                                                                                                               | ED |   |   |   |   |   | Y |
| Walker       | 2010 | BMC Medical Education                                                                                                                            | EM |   | Y |   | Y | Y |   |
| Wallace      | 2012 | PLOS One                                                                                                                                         | EM | Y | Y |   |   |   |   |
| Walters      | 2011 | Journal of the American Society for Information Science and Technology                                                                           | EM | Y | Y |   | Y |   |   |
| Waltman      | 2013 | In: Gorraiz J, Schiebel E, Gumpenberger C, Horlesberger M, Moed H, eds. 14th International Society of Scientometrics and Informetrics Conference | EM |   | Y | Y |   |   | Y |
| Waltman      | 2013 | Journal of Informetrics                                                                                                                          | EM |   | Y |   |   |   |   |
| Wang         | 2013 | Science                                                                                                                                          | EM |   |   | Y | Y | Y | Y |
| Ward         | 2012 | Anaesthesia                                                                                                                                      | ED |   |   |   |   |   |   |
| Watson       | 2015 | Journal of Pediatric Surgery                                                                                                                     | EM |   | Y | Y |   |   |   |
| Welk         | 2014 | Research Quarterly for Exercise and Sport                                                                                                        | ED |   |   |   | Y |   |   |
| Wieczorek    | 2016 | Financial Environment and Business Development                                                                                                   | ED |   | Y | Y | Y |   |   |
| Wildgaard    | 2014 | Scientometrics                                                                                                                                   | RE |   | Y | Y | Y | Y |   |
| Williamson   | 2008 | Family Medicine                                                                                                                                  | EM |   |   |   |   |   | Y |
| Wootton      | 2013 | Health Research Policy and Systems                                                                                                               | EM | Y |   |   | Y |   | Y |
| Würtz        | 2016 | Annals of Epidemiology                                                                                                                           | RE |   |   | Y |   |   |   |



|    |             |      |                                                   |    |   |   |   |   |
|----|-------------|------|---------------------------------------------------|----|---|---|---|---|
| 1  |             |      |                                                   |    |   |   |   |   |
| 2  |             |      |                                                   |    |   |   |   |   |
| 3  | Wykes       | 2013 | Journal of Mental Health                          | ED |   | Y | Y |   |
| 4  |             |      |                                                   |    |   |   |   |   |
| 5  | Yaminfirooz | 2015 | The Electronic Library                            | EM |   | Y |   | Y |
| 6  |             |      |                                                   |    |   |   |   |   |
| 7  | Yang        | 2013 | Journal of Informetrics                           | EM | Y | Y |   | Y |
| 8  |             |      |                                                   |    |   |   |   |   |
| 9  | Yates       | 2015 | Source Code for Biology and Medicine              | EM | Y |   |   |   |
| 10 |             |      |                                                   |    |   |   |   |   |
| 11 | Yu          | 2016 | Computers in Human Behaviour                      | EM |   |   |   | Y |
| 12 |             |      |                                                   |    |   |   |   |   |
| 13 | Ze          | 2012 | International Conference on Intelligent Computing | EM |   | Y | Y |   |
| 14 |             |      |                                                   |    |   |   |   |   |
| 15 | Zhang       | 2012 | Scientometrics                                    | EM |   |   |   | Y |
| 16 |             |      |                                                   |    |   |   |   |   |
| 17 | Zhang       | 2017 | PLOS One                                          | EM |   | Y | Y |   |
| 18 |             |      |                                                   |    |   |   |   |   |
| 19 | Zhang       | 2012 | Scientometrics                                    | EM |   | Y | Y | Y |
| 20 |             |      |                                                   |    |   |   |   |   |
| 21 | Zhao        | 2014 | Scientometrics                                    | EM | Y |   | Y | Y |
| 22 |             |      |                                                   |    |   |   |   |   |
| 23 | Zhou        | 2012 | New Journal of Physics                            | EM |   |   | Y | Y |
| 24 |             |      |                                                   |    |   |   |   |   |
| 25 | Zhu         | 2015 | arXiv                                             | EM |   |   |   | Y |
| 26 |             |      |                                                   |    |   |   |   |   |
| 27 | Zhuo        | 2008 | Molecular Pain                                    | EM | Y |   | Y | Y |
| 28 |             |      |                                                   |    |   |   |   |   |
| 29 | Zima        | 2008 | Biochemia Medica                                  | ED |   |   | Y | Y |
| 30 |             |      |                                                   |    |   |   |   |   |
| 31 | Zou         | 2016 | Scientometrics                                    | EM |   | Y | Y | Y |
| 32 |             |      |                                                   |    |   |   |   |   |
| 33 | Zupetic     | 2017 | Academic Radiology                                | EM |   | Y |   |   |
| 34 |             |      |                                                   |    |   |   |   |   |
| 35 | Zyczkowski  | 2010 | Scientometrics                                    | ED |   |   |   | Y |

<sup>^</sup>Empirical (EM); Editorial/Opinion (ED); Review (RE); Other (O).

Appendix 3: New models and metrics for assessing an individual researcher’s achievement (2007-2017)

| First author | Year | Journal name                                  | Level      | Metric or Model | Name                          | Basis                                     | Description                                                                                                                                                                                                                                                                                                                                                         |
|--------------|------|-----------------------------------------------|------------|-----------------|-------------------------------|-------------------------------------------|---------------------------------------------------------------------------------------------------------------------------------------------------------------------------------------------------------------------------------------------------------------------------------------------------------------------------------------------------------------------|
| Anderson     | 2008 | Scientometrics                                | Researcher | Metric          | Tapered h-index               | h-index                                   | It accounts for the tapered distribution of citations.                                                                                                                                                                                                                                                                                                              |
| Aragon       | 2013 | Nature Scientific Reports                     | Both       | Metric          | Scientist impact ( $\Phi$ )   | Author contributions and citation counts  | Instead of the total number of citations, the proposed measure $\Phi$ (Scientist Impact) aims at discerning the genuine number of people (specifically lead authors) the paper (or first author) has had an impact upon by removing self-citation. In other words, $\Phi$ aims at measuring the paper's reach.                                                      |
| Assimakis    | 2010 | Scientometrics                                | Researcher | Metric          | The Golden Productivity Index | Author contribution and publication count | A rank dependent index that measures the productivity of an individual researcher by evaluating the number of papers as well as the rank of co-authorship. It emphasizes the first author's contribution.                                                                                                                                                           |
| Bai          | 2016 | PLOS One                                      | Researcher | Metric          | COIRank algorithm             | Network analysis                          | Quantifies scientific impact by reproducing the accumulated COI relationship in the scientific community. COIRank focuses on improving PageRank though setting a weight for PageRank algorithm and promotes the performance in identifying influential articles. It therefore accounts for self-citation and citation by others at the same institution.            |
| Belikov      | 2015 | f1000 Research                                | Researcher | Metric          | L-index                       | h-index and author contribution           | Accounts for co-author contribution by designating citations to each individual author according to their order on a paper. It also considers the age of publications, favoring newer ones. However, if a scientist has made a significant scientific breakthrough and ceases publications, his or her L-index will remain high regardless. It ranges from 0.0-9.9. |
| Bini         | 2008 | Electronic Transactions on Numerical Analysis | Both       | Metric          | Information not available     | Citation count                            | Proposes to integrate models for evaluating papers, authors, and journals based on citations, co-authorship and publications. After the one-class model for ranking scientific publications, they introduced the two-class model which ranks papers and authors, and the three-class model for ranking papers, authors, and journals.                               |

|    |             |      |                                                   |            |        |                                                         |                            |                                                                                                                                                                                                                                                                                                                                                                                                                                                                                                                                                                                                                                                                                                                                                                   |
|----|-------------|------|---------------------------------------------------|------------|--------|---------------------------------------------------------|----------------------------|-------------------------------------------------------------------------------------------------------------------------------------------------------------------------------------------------------------------------------------------------------------------------------------------------------------------------------------------------------------------------------------------------------------------------------------------------------------------------------------------------------------------------------------------------------------------------------------------------------------------------------------------------------------------------------------------------------------------------------------------------------------------|
| 1  |             |      |                                                   |            |        |                                                         |                            |                                                                                                                                                                                                                                                                                                                                                                                                                                                                                                                                                                                                                                                                                                                                                                   |
| 2  |             |      |                                                   |            |        |                                                         |                            |                                                                                                                                                                                                                                                                                                                                                                                                                                                                                                                                                                                                                                                                                                                                                                   |
| 3  | Bloching    | 2013 | South African Journal of Science                  | Article    | Metric | TAPSIF-temporally averaged paper-specific impact factor | Citation count and IF      | Calculated from a paper's average number of citations per year (including the publication year) combined with bonus cites for the publishing journal's prestige—which is taken as the journal impact factor from the publication year. Annual TAPSIF values of all the papers by an author can be combined to measure the overall scientific relevance of that author (temporally averaged author-specific impact factor TAASIF).                                                                                                                                                                                                                                                                                                                                 |
| 4  |             |      |                                                   |            |        |                                                         |                            |                                                                                                                                                                                                                                                                                                                                                                                                                                                                                                                                                                                                                                                                                                                                                                   |
| 5  |             |      |                                                   |            |        |                                                         |                            |                                                                                                                                                                                                                                                                                                                                                                                                                                                                                                                                                                                                                                                                                                                                                                   |
| 6  |             |      |                                                   |            |        |                                                         |                            |                                                                                                                                                                                                                                                                                                                                                                                                                                                                                                                                                                                                                                                                                                                                                                   |
| 7  |             |      |                                                   |            |        |                                                         |                            |                                                                                                                                                                                                                                                                                                                                                                                                                                                                                                                                                                                                                                                                                                                                                                   |
| 8  |             |      |                                                   |            |        |                                                         |                            |                                                                                                                                                                                                                                                                                                                                                                                                                                                                                                                                                                                                                                                                                                                                                                   |
| 9  |             |      |                                                   |            |        |                                                         |                            |                                                                                                                                                                                                                                                                                                                                                                                                                                                                                                                                                                                                                                                                                                                                                                   |
| 10 | Bollen      | 2016 | Scientometrics                                    | Researcher | Model  | Equal Allocation Model                                  | Peer-review                | A novel model in which each researcher is allocated funding and is required to donate a proportion of that funding to other researchers—hence uses crowd wisdom to fund scientists.                                                                                                                                                                                                                                                                                                                                                                                                                                                                                                                                                                               |
| 11 |             |      |                                                   |            |        |                                                         |                            |                                                                                                                                                                                                                                                                                                                                                                                                                                                                                                                                                                                                                                                                                                                                                                   |
| 12 |             |      |                                                   |            |        |                                                         |                            |                                                                                                                                                                                                                                                                                                                                                                                                                                                                                                                                                                                                                                                                                                                                                                   |
| 13 | Caminiti    | 2015 | BMC Health Services Research                      | Researcher | Metric | Information not available                               | Citation count             | This work in progress suggests a mixture of 12 easily retrievable indicators (bibliometric and citation parameters, as well as “hidden” activities such as teaching, mentoring etc). The weighting system was constructed considering the hypothesized effort for all indicators. The chosen indicators and attributed scores still remain to be validated. Modified from Wooton, Health Res Policy Syst. 2013;11:2; Smith, Br Med J. 2001;323(7312):528–8.; and Mezrich J Am Coll Radiol. 2007;4(7):471–8.                                                                                                                                                                                                                                                       |
| 14 |             |      |                                                   |            |        |                                                         |                            |                                                                                                                                                                                                                                                                                                                                                                                                                                                                                                                                                                                                                                                                                                                                                                   |
| 15 |             |      |                                                   |            |        |                                                         |                            |                                                                                                                                                                                                                                                                                                                                                                                                                                                                                                                                                                                                                                                                                                                                                                   |
| 16 |             |      |                                                   |            |        |                                                         |                            |                                                                                                                                                                                                                                                                                                                                                                                                                                                                                                                                                                                                                                                                                                                                                                   |
| 17 |             |      |                                                   |            |        |                                                         |                            |                                                                                                                                                                                                                                                                                                                                                                                                                                                                                                                                                                                                                                                                                                                                                                   |
| 18 |             |      |                                                   |            |        |                                                         |                            |                                                                                                                                                                                                                                                                                                                                                                                                                                                                                                                                                                                                                                                                                                                                                                   |
| 19 |             |      |                                                   |            |        |                                                         |                            |                                                                                                                                                                                                                                                                                                                                                                                                                                                                                                                                                                                                                                                                                                                                                                   |
| 20 |             |      |                                                   |            |        |                                                         |                            |                                                                                                                                                                                                                                                                                                                                                                                                                                                                                                                                                                                                                                                                                                                                                                   |
| 21 | Castelnuovo | 2010 | Clinical Practice & Epidemiology in Mental Health | Researcher | Metric | Single Researcher Impact Factor                         | IF                         | This metric takes into account publications (journal articles, books, oral and poster presentations in scientific meetings); products (e.g., software, CD-ROM, videos, databases); and activities (reported scientific activities such as scientific positions or positions in conferences organization, participation in journal editorial boards, activities on human resources education, and participation in international funding projects). Minimum and maximum values are assigned to each task for national and international impact.                                                                                                                                                                                                                    |
| 22 |             |      |                                                   |            |        |                                                         |                            |                                                                                                                                                                                                                                                                                                                                                                                                                                                                                                                                                                                                                                                                                                                                                                   |
| 23 |             |      |                                                   |            |        |                                                         |                            |                                                                                                                                                                                                                                                                                                                                                                                                                                                                                                                                                                                                                                                                                                                                                                   |
| 24 |             |      |                                                   |            |        |                                                         |                            |                                                                                                                                                                                                                                                                                                                                                                                                                                                                                                                                                                                                                                                                                                                                                                   |
| 25 |             |      |                                                   |            |        |                                                         |                            |                                                                                                                                                                                                                                                                                                                                                                                                                                                                                                                                                                                                                                                                                                                                                                   |
| 26 |             |      |                                                   |            |        |                                                         |                            |                                                                                                                                                                                                                                                                                                                                                                                                                                                                                                                                                                                                                                                                                                                                                                   |
| 27 |             |      |                                                   |            |        |                                                         |                            |                                                                                                                                                                                                                                                                                                                                                                                                                                                                                                                                                                                                                                                                                                                                                                   |
| 28 |             |      |                                                   |            |        |                                                         |                            |                                                                                                                                                                                                                                                                                                                                                                                                                                                                                                                                                                                                                                                                                                                                                                   |
| 29 | Claro       | 2011 | Scientometrics                                    | Researcher | Metric | The x-index                                             | IF and author contribution | Aims to enable cross-disciplinary comparison and uses indicators of both quality and quantity, taking into account the number of publications a researcher has published, and then calculating a publication score for each. This considers number of authors on the paper and the journal's 5-year impact factor; it is also normalized by the journals in which the author tends to publish (rather than top-down classification of a field). Also uses a co-authorship share coefficient. Therefore, aims to determine relative contribution to a paper and normalize by field. While requiring only modest data extraction and processing efforts, it is not based on individual article citations but that of the journal (JIF), which can have limitations. |
| 30 |             |      |                                                   |            |        |                                                         |                            |                                                                                                                                                                                                                                                                                                                                                                                                                                                                                                                                                                                                                                                                                                                                                                   |
| 31 |             |      |                                                   |            |        |                                                         |                            |                                                                                                                                                                                                                                                                                                                                                                                                                                                                                                                                                                                                                                                                                                                                                                   |
| 32 |             |      |                                                   |            |        |                                                         |                            |                                                                                                                                                                                                                                                                                                                                                                                                                                                                                                                                                                                                                                                                                                                                                                   |
| 33 |             |      |                                                   |            |        |                                                         |                            |                                                                                                                                                                                                                                                                                                                                                                                                                                                                                                                                                                                                                                                                                                                                                                   |
| 34 |             |      |                                                   |            |        |                                                         |                            |                                                                                                                                                                                                                                                                                                                                                                                                                                                                                                                                                                                                                                                                                                                                                                   |
| 35 |             |      |                                                   |            |        |                                                         |                            |                                                                                                                                                                                                                                                                                                                                                                                                                                                                                                                                                                                                                                                                                                                                                                   |
| 36 |             |      |                                                   |            |        |                                                         |                            |                                                                                                                                                                                                                                                                                                                                                                                                                                                                                                                                                                                                                                                                                                                                                                   |
| 37 |             |      |                                                   |            |        |                                                         |                            |                                                                                                                                                                                                                                                                                                                                                                                                                                                                                                                                                                                                                                                                                                                                                                   |
| 38 |             |      |                                                   |            |        |                                                         |                            |                                                                                                                                                                                                                                                                                                                                                                                                                                                                                                                                                                                                                                                                                                                                                                   |
| 39 |             |      |                                                   |            |        |                                                         |                            |                                                                                                                                                                                                                                                                                                                                                                                                                                                                                                                                                                                                                                                                                                                                                                   |
| 40 |             |      |                                                   |            |        |                                                         |                            |                                                                                                                                                                                                                                                                                                                                                                                                                                                                                                                                                                                                                                                                                                                                                                   |
| 41 |             |      |                                                   |            |        |                                                         |                            |                                                                                                                                                                                                                                                                                                                                                                                                                                                                                                                                                                                                                                                                                                                                                                   |
| 42 |             |      |                                                   |            |        |                                                         |                            |                                                                                                                                                                                                                                                                                                                                                                                                                                                                                                                                                                                                                                                                                                                                                                   |
| 43 |             |      |                                                   |            |        |                                                         |                            |                                                                                                                                                                                                                                                                                                                                                                                                                                                                                                                                                                                                                                                                                                                                                                   |
| 44 |             |      |                                                   |            |        |                                                         |                            |                                                                                                                                                                                                                                                                                                                                                                                                                                                                                                                                                                                                                                                                                                                                                                   |
| 45 |             |      |                                                   |            |        |                                                         |                            |                                                                                                                                                                                                                                                                                                                                                                                                                                                                                                                                                                                                                                                                                                                                                                   |
| 46 |             |      |                                                   |            |        |                                                         |                            |                                                                                                                                                                                                                                                                                                                                                                                                                                                                                                                                                                                                                                                                                                                                                                   |

|    |             |      |                   |            |        |              |            |                                                                                                                                                                                                                                                                                                                                                                                                                                                                                                                                                                                                                                                                                                  |
|----|-------------|------|-------------------|------------|--------|--------------|------------|--------------------------------------------------------------------------------------------------------------------------------------------------------------------------------------------------------------------------------------------------------------------------------------------------------------------------------------------------------------------------------------------------------------------------------------------------------------------------------------------------------------------------------------------------------------------------------------------------------------------------------------------------------------------------------------------------|
| 1  |             |      |                   |            |        |              |            |                                                                                                                                                                                                                                                                                                                                                                                                                                                                                                                                                                                                                                                                                                  |
| 2  |             |      |                   |            |        |              |            |                                                                                                                                                                                                                                                                                                                                                                                                                                                                                                                                                                                                                                                                                                  |
| 3  | Cordero-    | 2015 | Revista de        | Both       | Metric | RC           | IF         | The first English-language publication of this metric, it quantitatively evaluates the personal impact factor of the scientific production of isolated researchers. It also an individual form (RC $\gamma$ ) and group form (RC $\gamma$ G), and is able to assess personal impact of individual publications, 2 or a group of them. It also provides a procedure to classify research centers of different types based on the impact (FRC $\gamma$ G) made by their results amongst researchers of the same field. One of the limitations of the RC algorithm is, precisely, its dependence on said bibliographic databases, which have a strong pre-eminence of studies published in English. |
| 4  | Villafafila |      | Psiquiatría y     |            |        | Algorithm    |            |                                                                                                                                                                                                                                                                                                                                                                                                                                                                                                                                                                                                                                                                                                  |
| 5  |             |      | Salud Mental      |            |        |              |            |                                                                                                                                                                                                                                                                                                                                                                                                                                                                                                                                                                                                                                                                                                  |
| 6  |             |      | (English Edition) |            |        |              |            |                                                                                                                                                                                                                                                                                                                                                                                                                                                                                                                                                                                                                                                                                                  |
| 7  |             |      |                   |            |        |              |            |                                                                                                                                                                                                                                                                                                                                                                                                                                                                                                                                                                                                                                                                                                  |
| 8  |             |      |                   |            |        |              |            |                                                                                                                                                                                                                                                                                                                                                                                                                                                                                                                                                                                                                                                                                                  |
| 9  |             |      |                   |            |        |              |            |                                                                                                                                                                                                                                                                                                                                                                                                                                                                                                                                                                                                                                                                                                  |
| 10 |             |      |                   |            |        |              |            |                                                                                                                                                                                                                                                                                                                                                                                                                                                                                                                                                                                                                                                                                                  |
| 11 |             |      |                   |            |        |              |            |                                                                                                                                                                                                                                                                                                                                                                                                                                                                                                                                                                                                                                                                                                  |
| 12 |             |      |                   |            |        |              |            |                                                                                                                                                                                                                                                                                                                                                                                                                                                                                                                                                                                                                                                                                                  |
| 13 | Crespo      | 2015 | PLOS One          | Other      | Metric | Exchange     | Citation   | This is an average-based indicator that is used to explore differential citation rates between disciplines by using it as a normalization factor. It is not suitable for assessing individual researchers but provides insight into comparison across disciplines.                                                                                                                                                                                                                                                                                                                                                                                                                               |
| 14 |             |      |                   |            |        | Rate         | count      |                                                                                                                                                                                                                                                                                                                                                                                                                                                                                                                                                                                                                                                                                                  |
| 15 |             |      |                   |            |        |              |            |                                                                                                                                                                                                                                                                                                                                                                                                                                                                                                                                                                                                                                                                                                  |
| 16 |             |      |                   |            |        |              |            |                                                                                                                                                                                                                                                                                                                                                                                                                                                                                                                                                                                                                                                                                                  |
| 17 | De Witte    | 2010 | Scientometrics    | Researcher | Metric | RES-score -  | Data       | Authors present a methodology to aggregate multidimensional research output, using a tailored version of the non-parametric Data Envelopment Analysis model. This they claim is a more accurate representation of a research performance.                                                                                                                                                                                                                                                                                                                                                                                                                                                        |
| 18 |             |      |                   |            |        | Research     | Envelopmen |                                                                                                                                                                                                                                                                                                                                                                                                                                                                                                                                                                                                                                                                                                  |
| 19 |             |      |                   |            |        | Evaluation   | t Analysis |                                                                                                                                                                                                                                                                                                                                                                                                                                                                                                                                                                                                                                                                                                  |
| 20 |             |      |                   |            |        | Score        |            |                                                                                                                                                                                                                                                                                                                                                                                                                                                                                                                                                                                                                                                                                                  |
| 21 | Delgadillo  | 2016 | Family &          | Both       | Metric | HLA-index    | h-index    | This index, actually originally published in a book by Harzing (2011), normalizes the h-index to take into account career stage and discipline.                                                                                                                                                                                                                                                                                                                                                                                                                                                                                                                                                  |
| 22 |             |      | Consumer          |            |        |              |            |                                                                                                                                                                                                                                                                                                                                                                                                                                                                                                                                                                                                                                                                                                  |
| 23 |             |      | Sciences          |            |        |              |            |                                                                                                                                                                                                                                                                                                                                                                                                                                                                                                                                                                                                                                                                                                  |
| 24 |             |      | Research Journal  |            |        |              |            |                                                                                                                                                                                                                                                                                                                                                                                                                                                                                                                                                                                                                                                                                                  |
| 25 | Dodson      | 2012 | Biochemical and   | Researcher | Metric | SP-index     | IF         | This metric is said to quantify the scientific production of researchers, representing the product of the annual citation number by the accumulated impact factors of the journals in which the papers are published, divided by the annual number of published papers.                                                                                                                                                                                                                                                                                                                                                                                                                          |
| 26 |             |      | Biophysical       |            |        |              |            |                                                                                                                                                                                                                                                                                                                                                                                                                                                                                                                                                                                                                                                                                                  |
| 27 |             |      | Research          |            |        |              |            |                                                                                                                                                                                                                                                                                                                                                                                                                                                                                                                                                                                                                                                                                                  |
| 28 |             |      | Communications    |            |        |              |            |                                                                                                                                                                                                                                                                                                                                                                                                                                                                                                                                                                                                                                                                                                  |
| 29 |             |      |                   |            |        |              |            |                                                                                                                                                                                                                                                                                                                                                                                                                                                                                                                                                                                                                                                                                                  |
| 30 | Duffy       | 2008 | Journal of        | Both       | Metric | IRPI -       | Citation   | This metric statistically combines an individual's author-weighted publications (AWS), average times cited by other publications (MC), and years since first publication (Y) into a comprehensive score, calculated as (AWS x MC)/Y. It thereby accounts for differences in career length.                                                                                                                                                                                                                                                                                                                                                                                                       |
| 31 |             |      | Counseling        |            |        | Integrated   | count      |                                                                                                                                                                                                                                                                                                                                                                                                                                                                                                                                                                                                                                                                                                  |
| 32 |             |      | Psychology        |            |        | Research     |            |                                                                                                                                                                                                                                                                                                                                                                                                                                                                                                                                                                                                                                                                                                  |
| 33 |             |      |                   |            |        | Productivity |            |                                                                                                                                                                                                                                                                                                                                                                                                                                                                                                                                                                                                                                                                                                  |
| 34 |             |      |                   |            |        | Index        |            |                                                                                                                                                                                                                                                                                                                                                                                                                                                                                                                                                                                                                                                                                                  |
| 35 | Ebadi       | 2016 | Scientometrics    | Researcher | Model  | iSEER        | Machine    | An intelligent machine learning framework for scientific evaluation of researchers (iSEER) considers various "influencing factors of different types" (e.g., funding, collaboration pattern, performance such as quantity and impact of papers, efficiency). It can be used as a complementary tool to overcome limitations in peer-review.                                                                                                                                                                                                                                                                                                                                                      |
| 36 |             |      |                   |            |        |              | learning   |                                                                                                                                                                                                                                                                                                                                                                                                                                                                                                                                                                                                                                                                                                  |
| 37 |             |      |                   |            |        |              |            |                                                                                                                                                                                                                                                                                                                                                                                                                                                                                                                                                                                                                                                                                                  |
| 38 |             |      |                   |            |        |              |            |                                                                                                                                                                                                                                                                                                                                                                                                                                                                                                                                                                                                                                                                                                  |
| 39 |             |      |                   |            |        |              |            |                                                                                                                                                                                                                                                                                                                                                                                                                                                                                                                                                                                                                                                                                                  |
| 40 |             |      |                   |            |        |              |            |                                                                                                                                                                                                                                                                                                                                                                                                                                                                                                                                                                                                                                                                                                  |
| 41 |             |      |                   |            |        |              |            |                                                                                                                                                                                                                                                                                                                                                                                                                                                                                                                                                                                                                                                                                                  |
| 42 |             |      |                   |            |        |              |            |                                                                                                                                                                                                                                                                                                                                                                                                                                                                                                                                                                                                                                                                                                  |
| 43 |             |      |                   |            |        |              |            |                                                                                                                                                                                                                                                                                                                                                                                                                                                                                                                                                                                                                                                                                                  |
| 44 |             |      |                   |            |        |              |            |                                                                                                                                                                                                                                                                                                                                                                                                                                                                                                                                                                                                                                                                                                  |
| 45 |             |      |                   |            |        |              |            |                                                                                                                                                                                                                                                                                                                                                                                                                                                                                                                                                                                                                                                                                                  |
| 46 |             |      |                   |            |        |              |            |                                                                                                                                                                                                                                                                                                                                                                                                                                                                                                                                                                                                                                                                                                  |

|              |      |                                                   |            |        |                           |                                                           |                                                                                                                                                                                                                                                                                                                                                                                                                                                                                                                                                                                                                                                                                                                                                                                                                                                                                      |
|--------------|------|---------------------------------------------------|------------|--------|---------------------------|-----------------------------------------------------------|--------------------------------------------------------------------------------------------------------------------------------------------------------------------------------------------------------------------------------------------------------------------------------------------------------------------------------------------------------------------------------------------------------------------------------------------------------------------------------------------------------------------------------------------------------------------------------------------------------------------------------------------------------------------------------------------------------------------------------------------------------------------------------------------------------------------------------------------------------------------------------------|
| Ekpo         | 2016 | Journal of Medical Imaging and Radiation Sciences | Researcher | Metric | TotalImpact               | Author contribution, publication count and citation count | For each of the authors, the total number of publications in peer-reviewed journals (P), total number of citations (C), international collaboration metrics, number of citations per publication (CPP), h-index, and i10-index are extracted (using SciVal). This metric assessed whether authors were leading the research or coauthoring by judging their position in the list of authors for each article. Authors listed as first, second, or last (FSL) were classified as lead researchers, and those listed in-between as coauthors. Each author's total impact was then quantified by: $TotalImpact = P \times C \times FSL$ .                                                                                                                                                                                                                                               |
| Franceschini | 2012 | Scientometrics                                    | Both       | Metric | Information not available | Citation counts and h-index                               | A study specific measurement that includes the number of publications/patents and their citations and also quantifies average number of co-authors relating to publications/patents of one researcher (an indicator of tendency for co-authorship). It also uses the minimum and maximum years: the oldest publication/patent and the year relating to their latest one. This provide an indication of the temporal extension of the publishing or patenting activity of a researcher. They also use the most-cited is publication/patent of a researcher, representing the "jewel in the crown" in terms of impact/diffusion. These metrics are also scalable to teams though, where the h-spectrum is h-values to a group of researchers (including average and medium), and the h-group is the h-index of the union of publications patents associated with publications/patents. |
| Franceschini | 2012 | Scientometrics                                    | Researcher | Metric | The Success-Index         | Citation counts, NSP-index by Komulski (2011)             | This metric is based on Komulski's (2011) NSP (number of successful papers) index, with the exception that for each publication the comparison term is sometimes replaced by a more appropriate indicator of propensity to cite, determined on the basis of a representative sample of publications. While it is more complicated than the original, it is insensitive to differential propensity to cite and therefore suitable for comparisons between authors of different fields.                                                                                                                                                                                                                                                                                                                                                                                                |

1  
2  
3  
4  
5  
6  
7  
8  
9  
10  
11  
12  
13  
14  
15  
16  
17  
18  
19  
20  
21  
22  
23  
24  
25  
26  
27  
28  
29  
30  
31  
32  
33  
34  
35  
36  
37  
38  
39  
40  
41  
42  
43  
44  
45  
46

|           |      |                                                                   |            |        |                                          |                                 |                                                                                                                                                                                                                                                                                                                                                                                                                                                                                                                                                                                       |
|-----------|------|-------------------------------------------------------------------|------------|--------|------------------------------------------|---------------------------------|---------------------------------------------------------------------------------------------------------------------------------------------------------------------------------------------------------------------------------------------------------------------------------------------------------------------------------------------------------------------------------------------------------------------------------------------------------------------------------------------------------------------------------------------------------------------------------------|
| Frittelli | 2016 | Journal of the Association for Information Science and Technology | Researcher | Metric | SRM - Scientific Research Measures       | h-index and calculus            | Proposes a novel class of measures (SRM) based on calculus principles that rank a scientist's research performance by taking into account the whole citation curve of a researcher (their performance curve - number of citations of each publication, in decreasing order of citations). The performance cures can be chosen flexibly (e.g., to reflect seniority, characteristics of a field). They extend this idea by proposing Dual SRMs, which are based on theories of risk-measures. It better distinguishes researchers with the same citation curve.                        |
| Gao       | 2016 | PLOS One                                                          | Both       | Metric | PR-index - PageRank Index                | Network analysis and h-index    | This metric uses PageRank score calculation combined with h-index calculation to measure author impact. It considers publication and citation quantity but also takes a publication's citation network into consideration. This means the index will rank majority authors higher by applying PageRank based on the publication citation relationship (distinguishing higher quality citations from lower ones).                                                                                                                                                                      |
| Han       | 2013 | Institute of Strategic Studies Islamabad                          | Both       | Metric | New Evaluation Index                     | Network analysis                | The new evaluation index takes into account direct and indirect references, direct and indirect citations, and citation network.                                                                                                                                                                                                                                                                                                                                                                                                                                                      |
| Holliday  | 2010 | International Journal of General Medicine                         | Article    | Model  | Modified Delphi technique of peer-review | Peer-review                     | This paper reports using the modified Delphi process to appraise and rank research applications, with experts rating each application's scientific merit, originality, the adequacy of the study design to achieve the research goals, and whether the potential impact of the study would warrant its funding. While its ease of administration, reproducibility, and accessibility makes this a useful adjunct to the traditional processes of grant selection, it does not directly assess individual researcher's but their work.                                                 |
| Hutchins  | 2016 | PLOS Biology                                                      | Both       | Metric | iCite                                    | Citation count                  | This is used for individual articles and normalizes their citation score by adding in co-citation metrics.                                                                                                                                                                                                                                                                                                                                                                                                                                                                            |
| Ibrahim   | 2015 | New Library World                                                 | Both       | Metric | Hx                                       | h-index and author contribution | This metric is a hybridization of two indicators based on the individual h-index (weighted by the average number of co-authors for each paper) and h-index contemporary weighted by qualitative factors (conferences and journal in which a researcher participated or published). It accounts for the period of citations and number of authors on a paper, is applicable at all levels and for any discipline of research, takes conferences into consideration, and is thought to reduce unscientific practices such as integration of authors who have not genuinely contributed. |

|    |           |      |                   |            |        |                                                    |                                                 |                                                                                                                                                                                                                                                                                                                                                                                                                                                                                                                                                                                                                                                                                                                                                                                                                                                                                                                                                                                                                                                                                                                                                                                                                  |
|----|-----------|------|-------------------|------------|--------|----------------------------------------------------|-------------------------------------------------|------------------------------------------------------------------------------------------------------------------------------------------------------------------------------------------------------------------------------------------------------------------------------------------------------------------------------------------------------------------------------------------------------------------------------------------------------------------------------------------------------------------------------------------------------------------------------------------------------------------------------------------------------------------------------------------------------------------------------------------------------------------------------------------------------------------------------------------------------------------------------------------------------------------------------------------------------------------------------------------------------------------------------------------------------------------------------------------------------------------------------------------------------------------------------------------------------------------|
| 1  |           |      |                   |            |        |                                                    |                                                 |                                                                                                                                                                                                                                                                                                                                                                                                                                                                                                                                                                                                                                                                                                                                                                                                                                                                                                                                                                                                                                                                                                                                                                                                                  |
| 2  |           |      |                   |            |        |                                                    |                                                 |                                                                                                                                                                                                                                                                                                                                                                                                                                                                                                                                                                                                                                                                                                                                                                                                                                                                                                                                                                                                                                                                                                                                                                                                                  |
| 3  | Ioannidis | 2016 | PLOS Biology      | Researcher | Metric | Composite                                          | Citation count, h-index and author contribution | A study-specific composite metric based: on total number of citations in, for example, 2013 (NC), total number of citations received in 2013 to papers for which the researcher is single author (NS), total number of citations received in 2013 to papers for which the author is single or first author (NSF), total number of citations received in 2013 to papers for which the researcher is single, first, or last author (NSFL). Added to these are the h-index and modified h-index. The indicators are standardized (NC, H, Hm, NS, NSF, NSFL), giving each a standardized value from 0 to 1, where 1 is given to the researcher with the highest raw value for the respective indicator. The six standardized indicators are then summed to generate the composite index C. Well-tested and validated using factor analysis, which yielded two factors: bulk impact (NC and H), author order and co-authorship-adjusted impact (Hm, NS, NSF, and NSFL).                                                                                                                                                                                                                                               |
| 4  |           |      |                   |            |        |                                                    |                                                 |                                                                                                                                                                                                                                                                                                                                                                                                                                                                                                                                                                                                                                                                                                                                                                                                                                                                                                                                                                                                                                                                                                                                                                                                                  |
| 5  |           |      |                   |            |        |                                                    |                                                 |                                                                                                                                                                                                                                                                                                                                                                                                                                                                                                                                                                                                                                                                                                                                                                                                                                                                                                                                                                                                                                                                                                                                                                                                                  |
| 6  |           |      |                   |            |        |                                                    |                                                 |                                                                                                                                                                                                                                                                                                                                                                                                                                                                                                                                                                                                                                                                                                                                                                                                                                                                                                                                                                                                                                                                                                                                                                                                                  |
| 7  |           |      |                   |            |        |                                                    |                                                 |                                                                                                                                                                                                                                                                                                                                                                                                                                                                                                                                                                                                                                                                                                                                                                                                                                                                                                                                                                                                                                                                                                                                                                                                                  |
| 8  |           |      |                   |            |        |                                                    |                                                 |                                                                                                                                                                                                                                                                                                                                                                                                                                                                                                                                                                                                                                                                                                                                                                                                                                                                                                                                                                                                                                                                                                                                                                                                                  |
| 9  |           |      |                   |            |        |                                                    |                                                 |                                                                                                                                                                                                                                                                                                                                                                                                                                                                                                                                                                                                                                                                                                                                                                                                                                                                                                                                                                                                                                                                                                                                                                                                                  |
| 10 |           |      |                   |            |        |                                                    |                                                 |                                                                                                                                                                                                                                                                                                                                                                                                                                                                                                                                                                                                                                                                                                                                                                                                                                                                                                                                                                                                                                                                                                                                                                                                                  |
| 11 |           |      |                   |            |        |                                                    |                                                 |                                                                                                                                                                                                                                                                                                                                                                                                                                                                                                                                                                                                                                                                                                                                                                                                                                                                                                                                                                                                                                                                                                                                                                                                                  |
| 12 |           |      |                   |            |        |                                                    |                                                 |                                                                                                                                                                                                                                                                                                                                                                                                                                                                                                                                                                                                                                                                                                                                                                                                                                                                                                                                                                                                                                                                                                                                                                                                                  |
| 13 |           |      |                   |            |        |                                                    |                                                 |                                                                                                                                                                                                                                                                                                                                                                                                                                                                                                                                                                                                                                                                                                                                                                                                                                                                                                                                                                                                                                                                                                                                                                                                                  |
| 14 |           |      |                   |            |        |                                                    |                                                 |                                                                                                                                                                                                                                                                                                                                                                                                                                                                                                                                                                                                                                                                                                                                                                                                                                                                                                                                                                                                                                                                                                                                                                                                                  |
| 15 |           |      |                   |            |        |                                                    |                                                 |                                                                                                                                                                                                                                                                                                                                                                                                                                                                                                                                                                                                                                                                                                                                                                                                                                                                                                                                                                                                                                                                                                                                                                                                                  |
| 16 |           |      |                   |            |        |                                                    |                                                 |                                                                                                                                                                                                                                                                                                                                                                                                                                                                                                                                                                                                                                                                                                                                                                                                                                                                                                                                                                                                                                                                                                                                                                                                                  |
| 17 |           |      |                   |            |        |                                                    |                                                 |                                                                                                                                                                                                                                                                                                                                                                                                                                                                                                                                                                                                                                                                                                                                                                                                                                                                                                                                                                                                                                                                                                                                                                                                                  |
| 18 | Iyendar   | 2009 | Academic Medicine | Researcher | Model  | RD - Research Density and Individual Impact Factor | IF                                              | RD measures the ability to obtain grants at a point in time, while IFF reflects the quality of research. The adopted methodology compares the impact factor of an investigator's articles with those of the top journals within their own field. Each investigator identified the top three journals in his or her field. The average impact factor of these three journals was used as the benchmark for that investigator. Each faculty member was then asked to calculate his or her own individual impact factor (IIF) for two consecutive years, using 75% of their benchmark as target. This benchmark was selected after reviewing results of comparisons of investigators' IIFs with their self-defined benchmarks at several multiples (50%, 75%, and 100%). We used 75% of the self-defined benchmark as the target, because it is unlikely for every paper to be published in the best journal in the field, and yet 75% reflects the reasonably high standard of the research quality that MSSM strives for. The data were collated and the IIF of each faculty member was computed as the ratio of his or her impact factor to 75% of his or her self-defined benchmark, expressed as a percentage. |
| 19 |           |      |                   |            |        |                                                    |                                                 |                                                                                                                                                                                                                                                                                                                                                                                                                                                                                                                                                                                                                                                                                                                                                                                                                                                                                                                                                                                                                                                                                                                                                                                                                  |
| 20 |           |      |                   |            |        |                                                    |                                                 |                                                                                                                                                                                                                                                                                                                                                                                                                                                                                                                                                                                                                                                                                                                                                                                                                                                                                                                                                                                                                                                                                                                                                                                                                  |
| 21 |           |      |                   |            |        |                                                    |                                                 |                                                                                                                                                                                                                                                                                                                                                                                                                                                                                                                                                                                                                                                                                                                                                                                                                                                                                                                                                                                                                                                                                                                                                                                                                  |
| 22 |           |      |                   |            |        |                                                    |                                                 |                                                                                                                                                                                                                                                                                                                                                                                                                                                                                                                                                                                                                                                                                                                                                                                                                                                                                                                                                                                                                                                                                                                                                                                                                  |
| 23 |           |      |                   |            |        |                                                    |                                                 |                                                                                                                                                                                                                                                                                                                                                                                                                                                                                                                                                                                                                                                                                                                                                                                                                                                                                                                                                                                                                                                                                                                                                                                                                  |
| 24 |           |      |                   |            |        |                                                    |                                                 |                                                                                                                                                                                                                                                                                                                                                                                                                                                                                                                                                                                                                                                                                                                                                                                                                                                                                                                                                                                                                                                                                                                                                                                                                  |
| 25 |           |      |                   |            |        |                                                    |                                                 |                                                                                                                                                                                                                                                                                                                                                                                                                                                                                                                                                                                                                                                                                                                                                                                                                                                                                                                                                                                                                                                                                                                                                                                                                  |
| 26 |           |      |                   |            |        |                                                    |                                                 |                                                                                                                                                                                                                                                                                                                                                                                                                                                                                                                                                                                                                                                                                                                                                                                                                                                                                                                                                                                                                                                                                                                                                                                                                  |
| 27 |           |      |                   |            |        |                                                    |                                                 |                                                                                                                                                                                                                                                                                                                                                                                                                                                                                                                                                                                                                                                                                                                                                                                                                                                                                                                                                                                                                                                                                                                                                                                                                  |
| 28 |           |      |                   |            |        |                                                    |                                                 |                                                                                                                                                                                                                                                                                                                                                                                                                                                                                                                                                                                                                                                                                                                                                                                                                                                                                                                                                                                                                                                                                                                                                                                                                  |
| 29 |           |      |                   |            |        |                                                    |                                                 |                                                                                                                                                                                                                                                                                                                                                                                                                                                                                                                                                                                                                                                                                                                                                                                                                                                                                                                                                                                                                                                                                                                                                                                                                  |
| 30 |           |      |                   |            |        |                                                    |                                                 |                                                                                                                                                                                                                                                                                                                                                                                                                                                                                                                                                                                                                                                                                                                                                                                                                                                                                                                                                                                                                                                                                                                                                                                                                  |
| 31 |           |      |                   |            |        |                                                    |                                                 |                                                                                                                                                                                                                                                                                                                                                                                                                                                                                                                                                                                                                                                                                                                                                                                                                                                                                                                                                                                                                                                                                                                                                                                                                  |
| 32 |           |      |                   |            |        |                                                    |                                                 |                                                                                                                                                                                                                                                                                                                                                                                                                                                                                                                                                                                                                                                                                                                                                                                                                                                                                                                                                                                                                                                                                                                                                                                                                  |
| 33 |           |      |                   |            |        |                                                    |                                                 |                                                                                                                                                                                                                                                                                                                                                                                                                                                                                                                                                                                                                                                                                                                                                                                                                                                                                                                                                                                                                                                                                                                                                                                                                  |
| 34 |           |      |                   |            |        |                                                    |                                                 |                                                                                                                                                                                                                                                                                                                                                                                                                                                                                                                                                                                                                                                                                                                                                                                                                                                                                                                                                                                                                                                                                                                                                                                                                  |
| 35 | Jeang     | 2008 | Retrovirology     | Researcher | Metric | Mentoring Index                                    | h-index                                         | Argues that good mentoring should be a significant consideration of one's contribution to science. It focuses on using the h-index of previous trainees in evaluating established researchers. It is thought this index could encourage the development of long-lasting mentoring relationships.                                                                                                                                                                                                                                                                                                                                                                                                                                                                                                                                                                                                                                                                                                                                                                                                                                                                                                                 |
| 36 |           |      |                   |            |        |                                                    |                                                 |                                                                                                                                                                                                                                                                                                                                                                                                                                                                                                                                                                                                                                                                                                                                                                                                                                                                                                                                                                                                                                                                                                                                                                                                                  |
| 37 |           |      |                   |            |        |                                                    |                                                 |                                                                                                                                                                                                                                                                                                                                                                                                                                                                                                                                                                                                                                                                                                                                                                                                                                                                                                                                                                                                                                                                                                                                                                                                                  |
| 38 |           |      |                   |            |        |                                                    |                                                 |                                                                                                                                                                                                                                                                                                                                                                                                                                                                                                                                                                                                                                                                                                                                                                                                                                                                                                                                                                                                                                                                                                                                                                                                                  |
| 39 |           |      |                   |            |        |                                                    |                                                 |                                                                                                                                                                                                                                                                                                                                                                                                                                                                                                                                                                                                                                                                                                                                                                                                                                                                                                                                                                                                                                                                                                                                                                                                                  |
| 40 |           |      |                   |            |        |                                                    |                                                 |                                                                                                                                                                                                                                                                                                                                                                                                                                                                                                                                                                                                                                                                                                                                                                                                                                                                                                                                                                                                                                                                                                                                                                                                                  |
| 41 |           |      |                   |            |        |                                                    |                                                 |                                                                                                                                                                                                                                                                                                                                                                                                                                                                                                                                                                                                                                                                                                                                                                                                                                                                                                                                                                                                                                                                                                                                                                                                                  |
| 42 |           |      |                   |            |        |                                                    |                                                 |                                                                                                                                                                                                                                                                                                                                                                                                                                                                                                                                                                                                                                                                                                                                                                                                                                                                                                                                                                                                                                                                                                                                                                                                                  |
| 43 |           |      |                   |            |        |                                                    |                                                 |                                                                                                                                                                                                                                                                                                                                                                                                                                                                                                                                                                                                                                                                                                                                                                                                                                                                                                                                                                                                                                                                                                                                                                                                                  |
| 44 |           |      |                   |            |        |                                                    |                                                 |                                                                                                                                                                                                                                                                                                                                                                                                                                                                                                                                                                                                                                                                                                                                                                                                                                                                                                                                                                                                                                                                                                                                                                                                                  |
| 45 |           |      |                   |            |        |                                                    |                                                 |                                                                                                                                                                                                                                                                                                                                                                                                                                                                                                                                                                                                                                                                                                                                                                                                                                                                                                                                                                                                                                                                                                                                                                                                                  |
| 46 |           |      |                   |            |        |                                                    |                                                 |                                                                                                                                                                                                                                                                                                                                                                                                                                                                                                                                                                                                                                                                                                                                                                                                                                                                                                                                                                                                                                                                                                                                                                                                                  |

1  
2  
3  
4  
5  
6  
7  
8  
9  
10  
11  
12  
13  
14  
15  
16  
17  
18  
19  
20  
21  
22  
23  
24  
25  
26  
27  
28  
29  
30  
31  
32  
33  
34  
35  
36  
37  
38  
39  
40  
41  
42  
43  
44  
45  
46

|          |      |                                                                  |         |        |                           |                              |                                                                                                                                                                                                                                                                                                                                                                                                                                                                                                                                                                                                                                                                                                                                                                                                                                                                                                                                                        |
|----------|------|------------------------------------------------------------------|---------|--------|---------------------------|------------------------------|--------------------------------------------------------------------------------------------------------------------------------------------------------------------------------------------------------------------------------------------------------------------------------------------------------------------------------------------------------------------------------------------------------------------------------------------------------------------------------------------------------------------------------------------------------------------------------------------------------------------------------------------------------------------------------------------------------------------------------------------------------------------------------------------------------------------------------------------------------------------------------------------------------------------------------------------------------|
| Krapivin | 2009 | Complex Sciences                                                 | Both    | Metric | PaperRank and PR-hirsch   | Network analysis and h-index | Based on PageRank, which has been very successful in ranking web pages, essentially considering the reputation of the web page referring to a given page, and the outgoing link density (i.e., pages P linked by pages L where L has few outgoing links are considered more important than pages P cited by pages L where L has many outgoing links). PaperRank (PR) applies page rank to papers by considering papers as web pages and citations as links, and hence trying to consider not only citations when ranking papers, but also taking into account the rank of the citing paper and the density of outgoing citations from the citing paper. The PR-Hirsch is a modification of the H-index based on the same PageRank approach. PR and PR-Hirsch are complementary to citation-based metrics, capable of capturing information present in the whole citation network, namely the “weight” (the reputation or authority) of a citing paper. |
| Kreines  | 2016 | Journal of Computer and Systems Sciences International           | Article | Model  | Information not available | Citation count and IF        | Proposes a model for assessing quality in the content of individual articles using computational analysis with bibliometric and scientometric data (number of citations and the journal's IF).                                                                                                                                                                                                                                                                                                                                                                                                                                                                                                                                                                                                                                                                                                                                                         |
| Lando    | 2014 | PLOS One                                                         | Article | Metric | L-index                   | h-index                      | This index considers the most elite papers and rewards papers of high impact and based on the form of the citation distribution. It is thought to outperform the h-index in terms of accuracy and sensitivity to the form of the citation distribution, while being strongly correlated with other important h-type indices. It rewards the more regular and reliable researchers.                                                                                                                                                                                                                                                                                                                                                                                                                                                                                                                                                                     |
| Liang    | 2015 | IEEE International Conference on Smart City/SocialCom/SustainCom | Both    | Model  | Temporal tracking model   |                              | The temporal research evolution model takes into account individual output, researcher profile and experiences                                                                                                                                                                                                                                                                                                                                                                                                                                                                                                                                                                                                                                                                                                                                                                                                                                         |



|            |      |                                    |            |        |                                    |                |                                                                                                                                                                                                                                                                                                                                                                                                                                                                                                                                                                                                                                                                                                                                                                                         |
|------------|------|------------------------------------|------------|--------|------------------------------------|----------------|-----------------------------------------------------------------------------------------------------------------------------------------------------------------------------------------------------------------------------------------------------------------------------------------------------------------------------------------------------------------------------------------------------------------------------------------------------------------------------------------------------------------------------------------------------------------------------------------------------------------------------------------------------------------------------------------------------------------------------------------------------------------------------------------|
| Lippi      | 2017 | Annals of Translational Medicine   | Researcher | Metric | SIF-Scientist Impact Factor        | IF             | This metric is calculated as all citations of articles published in the two years following the publication year of the articles, divided by the overall number of articles published in that year. For example, the SIF for the year 2017 would be obtained by dividing all citations in the years 2015–2016 to articles published in the year 2014, divided by the overall number of articles published in the year 2014. The total number of recent citations is normalized according to the number of recently published articles, limiting the bias emerging from publishing a large number of scarcely cited articles; and the output measure reliably reflects the recent scientific impact of the scientist, so complementing an overall career indicator, such as the h-index. |
| Markpin    | 2008 | Scientometrics                     | Other      | Metric | ACIF - Article-Count Impact Factor | IF             | This is proposed as a journal-level metric that is calculated as the total number of articles cited in the current year divided by the number of articles published in 1st and 2nd year. Note that is based on the number of articles that were cited, rather than the times cited of the cited articles. However, it could be used for individual researchers.                                                                                                                                                                                                                                                                                                                                                                                                                         |
| Matsas     | 2012 | Brazilian Journal of Physics       | Both       | Metric | NIF - Normalized Impact Factor     | IF             | Introduces a normalized impact factor that looks at the researchers influence on their scientific community by assessing the degree to which they have been influenced by their community. Looks each of an author's publications, the number of co-authors, references in the article and citations it has received. From the way it is calculated: "in a closed community of identical individuals (i.e., who publish, reference and are cited by each other at the same rate), all members have NIF = 1." Leaders in a field are then those with a NIF greater than or equal to 1 i.e., they influence their peers at least as much as they are influenced by them.                                                                                                                  |
| Maunder    | 2007 | La Revue Canadienne de Psychiatrie | Article    | Metric | Citation Ratio                     | Citation count | This metric is designed to overcome systematic differences amongst niche fields by comparing the impact of a particular paper to the average impact of a paper in its journal. A ratio above 1 indicates relatively greater success.                                                                                                                                                                                                                                                                                                                                                                                                                                                                                                                                                    |
| Mazlounian | 2011 | PLOS One                           | Article    | Metric | Boost Factor                       | Citation count | This metric calculates when a particular research gains scientific authority, that is, they publish some groundbreaking work that then leads to an upswing in citations of their earlier papers. It is able to model the trend of the "rich get richer", a cascade of citations and is too improve the "signal-to-noise" ratio in citation rates by detecting sudden changes in citations.                                                                                                                                                                                                                                                                                                                                                                                              |

1  
2  
3  
4  
5  
6  
7  
8  
9  
10  
11  
12  
13  
14  
15  
16  
17  
18  
19  
20  
21  
22  
23  
24  
25  
26  
27  
28  
29  
30  
31  
32  
33  
34  
35  
36  
37  
38  
39  
40  
41  
42  
43  
44  
45  
46

|                     |      |                                            |            |        |                                               |                                         |                                                                                                                                                                                                                                                                                                                                                                                                                                                                                                                                                                |
|---------------------|------|--------------------------------------------|------------|--------|-----------------------------------------------|-----------------------------------------|----------------------------------------------------------------------------------------------------------------------------------------------------------------------------------------------------------------------------------------------------------------------------------------------------------------------------------------------------------------------------------------------------------------------------------------------------------------------------------------------------------------------------------------------------------------|
| Milone              | 2016 | American Journal of Orthopedics            | Article    | Metric | Information not available                     | Publication count                       | A study specific measurement simply calculated by taking the mean of first and last authored publications.                                                                                                                                                                                                                                                                                                                                                                                                                                                     |
| Mooji               | 2014 | Scientometrics                             | Both       | Model  | Information not available                     | Peer-review, altmetrics, citation count | This paper proposes a comprehensive and new framework for assessing research quality assessment which utilizes intrinsic (i.e., the internal quality of a publication) and extrinsic indicators (i.e., citation counts, web-based influence). It uses peer-review ratings for the former and bibliometric and altmetric data at the individual article and author levels for the latter. One limit includes that the assessment of extrinsic factors is still biased in terms of multi-author papers. This framework builds in a quality check on peer-review. |
| Moreira             | 2015 | PLOS One                                   | Researcher | Metric | $\mu$                                         | Information not available               | Suggests accumulated citations from an author's aggregated publications follow an asymptotic number, and then use a lognormal model. Creates $\mu$ as a scale of expected citability of a researcher's publication. It is able to be used at all career stages and indicates more of quality over quantity.                                                                                                                                                                                                                                                    |
| Morel               | 2009 | PLOS Neglected Tropic Diseases             | Researcher | Metric | Information not available                     | Network Analysis                        | Co-citation networks generated using SNA of publications, to identify groups and individuals with high collaboration rates.                                                                                                                                                                                                                                                                                                                                                                                                                                    |
| Niederkroten thaler | 2011 | BMC Public Health                          | Article    | Model  | Information not available                     | Information not available               | A tool designed to measure the societal impact of research publications. It consists of three quantitative dimensions: (1) the aim of a publication, (2) the efforts of the authors to translate their research results, and, if translation was accomplished, (3) (a) the size of the area where translation was accomplished (regional, national or international), (b) its status (preliminary versus permanent) and (c) the target group of the translation (individuals, subgroup of population, total population).                                       |
| Nosek               | 2010 | Personality and Social Psychology Bulletin | Researcher | Metric | Ics-Individual researcher career-stage impact | Citation count                          | Produces career-stage metric of scientific impact based on citation counts. Its development was based on extensive data collection to produce a regression of expected growth of impact over time. It, therefore, reflects the distance from one's expected impact at a given career stage.                                                                                                                                                                                                                                                                    |
| Pagani              | 2015 | Scientometrics                             | Article    | Metric | Methodi Ordinatio                             | IF                                      | Based on IF, number of citations and year of publication in a normalized, weighted mathematical equation. It is a potential way to define scientific relevance.                                                                                                                                                                                                                                                                                                                                                                                                |

|   |          |      |                                                                                 |            |        |                                                  |                |                                                                                                                                                                                                                                                                                                                                                                                                                                                     |
|---|----------|------|---------------------------------------------------------------------------------|------------|--------|--------------------------------------------------|----------------|-----------------------------------------------------------------------------------------------------------------------------------------------------------------------------------------------------------------------------------------------------------------------------------------------------------------------------------------------------------------------------------------------------------------------------------------------------|
| 1 | Pan      | 2014 | Science Reports                                                                 | Researcher | Metric | Author Impact Factor (AIF)                       |                | Defined as the AIF of an author A in year t is the average number of citations given by papers published in year t to papers published by A in a period of $\Delta t$ years before year t. Uses a time window of years for calculation.                                                                                                                                                                                                             |
| 2 | Patel    | 2013 | Journal of the Royal Society of Medicine                                        | Researcher | Model  | sRM - statistical Regression Model               | Citation count | Used to estimate the number of high visibility (based on citation count) publications of each researcher.                                                                                                                                                                                                                                                                                                                                           |
| 3 | Pepe     | 2012 | PLOS One                                                                        | Researcher | Metric | TORI - Total Research Impact                     | Citation count | Includes non-self-citations accrued by the researcher, number of authors on cited paper, and number of bibliographic references to generate the cumulative output of a scholar by summing the impact of every external citation accrued in his/her career. This removes biases associated with citation counts.                                                                                                                                     |
| 4 | Petersen | 2013 | Journal of Informetrics                                                         | Researcher | Metric | Z                                                | h-index        | Z is aimed at correcting the h-index's penalty (which in some cases neglects 75% of an author's body of work) by including the total number of citations for their work in the metric.                                                                                                                                                                                                                                                              |
| 5 | Pöder    | 2017 | Trames-Journal of the Humanities and Social Sciences                            | Researcher | Metric | (Current or predicted) impact rate of researcher | Citation count | Based on the citations per year squared, this metric provides a means of assessing acceleration/impact and is based on time series data. This is more sensitive to productivity overtime and can go down unlike the h-index.                                                                                                                                                                                                                        |
| 6 | Prathap  | 2014 | Scientometrics                                                                  | Researcher | Metric | Z-index                                          | h-index        | Purporting to include quality, quantity and consistency, it accounts for the high-end of research performance, while compensating for the skewness of citation-publication distributions.                                                                                                                                                                                                                                                           |
| 7 | Radicchi | 2008 | Proceedings of the National Academy of Sciences of the United States of America | Article    | Metric | Relative Indicator - cf                          | Citation count | The relative indicator is used to deal with the fact that different fields have different citation patterns and allows for comparisons of the success of articles in different fields.                                                                                                                                                                                                                                                              |
| 8 | Ribas    | 2015 | Proceedings of the 24th International Conference on World Wide Web              | Both       | Metric | P-score                                          | Citation count | It associates a reputation with publication venues based on the publication patterns of reference groups, composed by researchers, in a given area of knowledge. Although the choice of reference groups can be made by using available citation data, the P-score metric itself does not depend on citation data. It uses just publication records of researchers and research groups; that is, the papers and the venues where they published in. |

|           |      |                                                 |            |        |                                                        |                              |                                                                                                                                                                                                                                                                                       |
|-----------|------|-------------------------------------------------|------------|--------|--------------------------------------------------------|------------------------------|---------------------------------------------------------------------------------------------------------------------------------------------------------------------------------------------------------------------------------------------------------------------------------------|
| Ricker    | 2009 | Interciencia                                    | Researcher | Model  | Rule-based peer-review                                 | Peer-review                  | Computer generated peer-review, which is positive as researchers get peer-review feedback. Can also measure evaluators select certain criteria of interest, important journals of interest based on field.                                                                            |
| Ruane     | 2009 | Scientometrics                                  | Both       | Metric | h1-index                                               | h-index                      | A measure of supervision quality, it gives the supervisor h1 index calculated by the h-indexes of their PhD students.                                                                                                                                                                 |
| Sahoo     | 2017 | Omega                                           | Researcher | Model  | Composite indicator                                    | h-index, IF, citation counts | Calculated based on the relative weight of the six indicators of journal tier, total citations, author h-index, number of papers, impact factor, and journal h-index.                                                                                                                 |
| Saxena    | 2013 | Journal of Pharmacology<br>Pharmacotherapeutics | Researcher | Metric | ORPI - Original Research Publication Index             | Citation count               | Indicates originality, productivity, and visibility, by including total number of original articles, citations, accounting for self-citations, and the total number of citable articles (i.e., including reviews and case reports). Also accounts for author order and career length. |
| Sibbald   | 2015 | Journal of the Medical Library Association      | Both       | Model  | Modified approach to citation analysis                 | Citation count               | Includes grey literature in the citation analysis search process and involves quantitative and qualitative methods of analysis to gain a better understanding of how a research paper was used. However, this is more expensive and time consuming than traditional metrics.          |
| Sittig    | 2015 | MEDINFO 2015: eHealth-enabled Health            | Researcher | Model  | The Biomedical Informatics Researchers ranking website | Information not available    | This new system was developed to overcome previous scientific productivity ranking strategies. However, it is limited to biomedical informatics.                                                                                                                                      |
| Sorenson  | 2011 | Journal of Parkinson's Disease                  | Both       | Metric | "Broad impact" citations                               | Citation count               | Citations from those outside the field are used as a measure of broader impact.                                                                                                                                                                                                       |
| Suria     | 2017 | The Electronic Library                          | Researcher | Metric | Research Impact Factor                                 | IF                           | Allows a measure of scientific influence of a researcher in their relative scientific area.                                                                                                                                                                                           |
| Szymanski | 2012 | Information Sciences                            | Both       | Metric | CENTs - sScientific currENcy Tokens and the I-index    | Citation count and h-index   | An accumulation of "cents" based on the number of non-self-citations. This is also the premise behind the i-index, whereby papers are ranked according to CENTs rather than just all citations.                                                                                       |

|             |      |                                    |            |        |                                           |                                        |                                                                                                                                                                                                                                                                                      |
|-------------|------|------------------------------------|------------|--------|-------------------------------------------|----------------------------------------|--------------------------------------------------------------------------------------------------------------------------------------------------------------------------------------------------------------------------------------------------------------------------------------|
| Tan         | 2016 | The Annals of Applied Statistics   | Article    | Model  | Information not available                 | Citation count                         | Proposes to use two established models in the creation of a third. The proposed model provides a structural understanding of the field variation in citation behavior and a measure of visibility for individual articles adjusted for citation probabilities within/between topics. |
| Vieira      | 2011 | Scientometrics                     | Researcher | Metric | hnf-index                                 | h-index                                | Considers the different cultures of citation of each field and the number of authors per publication, and hence can be used to measure researcher performance.                                                                                                                       |
| Wagner      | 2012 | Research Evaluation                | Researcher | Metric | I3 - Integrated impact indicator          | Citation count                         | A framework for integrating citations and non-parametric statistics of percentiles, which allow highly cited papers to be weighted more than less-cited ones.                                                                                                                        |
| Waltman     | 2013 |                                    | Article    | Metric | HCP – Highly cited publications index     | Citation count                         | A simple model in which the number of citations of a publication depends not only on the scientific impact of the publication but also on other ‘random’ factors. Does not account for productivity.                                                                                 |
| Wang        | 2013 | Science                            | Article    | Model  | Mechanistic model for citation dynamics   | Citation count                         | Authors demonstrate a predictable course for citations of single articles over time, purporting, therefore, to create more reliable predictive index of individual impact.                                                                                                           |
| Williamson  | 2008 | Family Medicine                    | Researcher | Metric | Information not available                 | Too broad to classify                  | Quantifies activities within three domains: teaching, service and research and scholarly activity. A time intensive- process that is suitable for promotion within institutions, but not grant funding or more macro-scale assessments.                                              |
| Wootton     | 2013 | Health Research Policy and Systems | Researcher | Metric | R - Simple indicator of researcher output |                                        | Formula is $R=g+p+s$ and comprises grant income (g), publications (peer-reviewed and weighted by JIF; p) and numbers of PhD students supervised (no credit for submission after the due date of submission; s).                                                                      |
| Yaminfirooz | 2015 | The Electronic Library             | Both       | Metric | mh-index                                  | h-index                                | Use to identify differences in the impact of authors with the same h-index, and differences between the outputs of influential researchers working in a certain field and the ones publishing only a few papers during a year, can track the impact of highly cited papers.          |
| Yang        | 2013 | Journal of Informetrics            | Researcher | Metric | A-index - Axiomatic approach              | Citation count and author contribution | Allows for evaluation of individual researcher in the team context (i.e., co-authorship networks).                                                                                                                                                                                   |

1  
2  
3  
4  
5  
6  
7  
8  
9  
10  
11  
12  
13  
14  
15  
16  
17  
18  
19  
20  
21  
22  
23  
24  
25  
26  
27  
28  
29  
30  
31  
32  
33  
34  
35  
36  
37  
38  
39  
40  
41  
42  
43  
44  
45  
46

|            |      |                        |            |        |                                          |                           |                                                                                                                                                                                                                           |
|------------|------|------------------------|------------|--------|------------------------------------------|---------------------------|---------------------------------------------------------------------------------------------------------------------------------------------------------------------------------------------------------------------------|
| Zhang      | 2012 | Scientometrics         | Both       | Model  | Scientometric age pyramid                | Information not available | Accounts for the different ages of academics, different fields, co-authorship patterns and analysis of journals. The pyramid represents the number of publications on one side and number of citations on the other side. |
| Zhou       | 2012 | New Journal of Physics | Both       | Metric | AP Algorithm                             | Citation count            | Considers the prestige of the scientists citing the article but assumes equal contribution of each author to the paper.                                                                                                   |
| Zhu        | 2015 | arXiv                  | Researcher | Metric | The hip index - Influence-primed h-index | h-index                   | The hip-index weights citations by how many times a reference is mentioned, which is thought to make it a better indicator of researcher performance.                                                                     |
| Zhuo       | 2008 | Omega                  | Other      | Metric | Z factor                                 | IF                        | Uses both the number of publications and the impact factors of the journals in which they were published.                                                                                                                 |
| Zou        | 2016 | Scientometrics         | Researcher | Metric | S-ZP index                               | IF                        | Metric based on journal impact factor of publications and author order.                                                                                                                                                   |
| Zyczkowski | 2010 | Scientometrics         | Both       | Metric | C - Citation matrix                      | h-index                   | A scheme based on weighing the citation based on previous scientific achievements and authors citing the paper.                                                                                                           |

# Reporting checklist for systematic review and meta-analysis.

Based on the PRISMA guidelines.

## Instructions to authors

Complete this checklist by entering the page numbers from your manuscript where readers will find each of the items listed below.

Your article may not currently address all the items on the checklist. Please modify your text to include the missing information. If you are certain that an item does not apply, please write "n/a" and provide a short explanation.

Upload your completed checklist as an extra file when you submit to a journal.

In your methods section, say that you used the PRISMA reporting guidelines, and cite them as:

Moher D, Liberati A, Tetzlaff J, Altman DG, The PRISMA Group. Preferred Reporting Items for Systematic Reviews and Meta-Analyses: The PRISMA Statement

|                    | Reporting Item                                                                                                                                                                                             | Page Number |
|--------------------|------------------------------------------------------------------------------------------------------------------------------------------------------------------------------------------------------------|-------------|
|                    | <a href="#">#1</a> Identify the report as a systematic review, meta-analysis, or both.                                                                                                                     | Title page  |
| Structured summary | <a href="#">#2</a> Provide a structured summary including, as applicable: background; objectives; data sources; study eligibility criteria, participants, and interventions; study appraisal and synthesis | 2-3         |

1 methods; results; limitations; conclusions and  
 2 implications of key findings; systematic review  
 3 registration number  
 4  
 5  
 6  
 7

|    |                                 |                    |                                                                                                                                                                                                                                                            |                                                 |
|----|---------------------------------|--------------------|------------------------------------------------------------------------------------------------------------------------------------------------------------------------------------------------------------------------------------------------------------|-------------------------------------------------|
| 8  | Rationale                       | <a href="#">#3</a> | Describe the rationale for the review in the context<br>9 of what is already known.<br>10<br>11                                                                                                                                                            | 4-5                                             |
| 12 | Objectives                      | <a href="#">#4</a> | Provide an explicit statement of questions being<br>13 addressed with reference to participants,<br>14 interventions, comparisons, outcomes, and study<br>15 design (PICOS).<br>16<br>17<br>18<br>19<br>20<br>21                                           | 5-7                                             |
| 22 | Protocol and<br>23 registration | <a href="#">#5</a> | Indicate if a review protocol exists, if and where it<br>24 can be accessed (e.g., Web address) and, if<br>25 available, provide registration information including<br>26 the registration number.<br>27<br>28<br>29<br>30<br>31<br>32                     | Review protocol<br>exists but is<br>unpublished |
| 33 | Eligibility criteria            | <a href="#">#6</a> | Specify study characteristics (e.g., PICOS, length<br>34 of follow-up) and report characteristics (e.g., years<br>35 considered, language, publication status) used as<br>36 criteria for eligibility, giving rational<br>37<br>38<br>39<br>40<br>41<br>42 | 5-7                                             |
| 43 | Information<br>44 sources       | <a href="#">#7</a> | Describe all information sources in the search<br>45 (e.g., databases with dates of coverage, contact<br>46 with study authors to identify additional studies)<br>47 and date last searched.<br>48<br>49<br>50<br>51<br>52                                 | 5-7                                             |
| 53 | Search                          | <a href="#">#8</a> | Present full electronic search strategy for at least<br>54 one database, including any limits used, such that<br>55 it could be repeated.<br>56<br>57<br>58                                                                                                | 4-7, Appendix 1                                 |



|    |                 |                     |                                                          |                     |
|----|-----------------|---------------------|----------------------------------------------------------|---------------------|
| 1  | Study selection | <a href="#">#9</a>  | State the process for selecting studies (i.e., for       | 4-7                 |
| 2  |                 |                     | screening, for determining eligibility, for inclusion in |                     |
| 3  |                 |                     | the systematic review, and, if applicable, for           |                     |
| 4  |                 |                     | inclusion in the meta-analysis).                         |                     |
| 5  |                 |                     |                                                          |                     |
| 6  |                 |                     |                                                          |                     |
| 7  |                 |                     |                                                          |                     |
| 8  |                 |                     |                                                          |                     |
| 9  |                 |                     |                                                          |                     |
| 10 |                 |                     |                                                          |                     |
| 11 | Data collection | <a href="#">#10</a> | Describe the method of data extraction from              | 5-7 and Appendix 2  |
| 12 |                 |                     | reports (e.g., piloted forms, independently by two       |                     |
| 13 | process         |                     | reviewers) and any processes for obtaining and           |                     |
| 14 |                 |                     | confirming data from investigators.                      |                     |
| 15 |                 |                     |                                                          |                     |
| 16 |                 |                     |                                                          |                     |
| 17 |                 |                     |                                                          |                     |
| 18 |                 |                     |                                                          |                     |
| 19 |                 |                     |                                                          |                     |
| 20 |                 |                     |                                                          |                     |
| 21 | Data items      | <a href="#">#11</a> | List and define all variables for which data were        | Page 6-7 and        |
| 22 |                 |                     | sought (e.g., PICOS, funding sources), and any           | Appendix 2          |
| 23 |                 |                     | assumptions and simplifications made.                    |                     |
| 24 |                 |                     |                                                          |                     |
| 25 |                 |                     |                                                          |                     |
| 26 |                 |                     |                                                          |                     |
| 27 |                 |                     |                                                          |                     |
| 28 |                 |                     |                                                          |                     |
| 29 | Risk of bias in | <a href="#">#12</a> | Describe methods used for assessing risk of bias         | 5-7                 |
| 30 |                 |                     | in individual studies (including specification of        |                     |
| 31 | individual      |                     | whether this was done at the study or outcome            |                     |
| 32 | studies         |                     | level, or both), and how this information is to be       |                     |
| 33 |                 |                     | used in any data synthesis.                              |                     |
| 34 |                 |                     |                                                          |                     |
| 35 |                 |                     |                                                          |                     |
| 36 |                 |                     |                                                          |                     |
| 37 |                 |                     |                                                          |                     |
| 38 |                 |                     |                                                          |                     |
| 39 |                 |                     |                                                          |                     |
| 40 |                 |                     |                                                          |                     |
| 41 | Summary         | <a href="#">#13</a> | State the principal summary measures (e.g., risk         | The primary outcome |
| 42 |                 |                     | ratio, difference in means).                             | measure was         |
| 43 | measures        |                     |                                                          | methods to assess   |
| 44 |                 |                     |                                                          | research            |
| 45 |                 |                     |                                                          | achievement.        |
| 46 |                 |                     |                                                          |                     |
| 47 |                 |                     |                                                          |                     |
| 48 |                 |                     |                                                          |                     |
| 49 |                 |                     |                                                          |                     |
| 50 |                 |                     |                                                          |                     |
| 51 |                 |                     |                                                          |                     |
| 52 |                 |                     |                                                          |                     |
| 53 | Planned         | <a href="#">#14</a> | Describe the methods of handling data and                | 6-7                 |
| 54 |                 |                     | combining results of studies, if done, including         |                     |
| 55 | methods of      |                     |                                                          |                     |
| 56 |                 |                     |                                                          |                     |
| 57 | analysis        |                     |                                                          |                     |
| 58 |                 |                     |                                                          |                     |
| 59 |                 |                     |                                                          |                     |
| 60 |                 |                     |                                                          |                     |

|    |                 |                                                                        |      |
|----|-----------------|------------------------------------------------------------------------|------|
| 1  |                 | measures of consistency (e.g., I <sup>2</sup> ) for each meta-         |      |
| 2  |                 | analysis.                                                              |      |
| 3  |                 |                                                                        |      |
| 4  |                 |                                                                        |      |
| 5  |                 |                                                                        |      |
| 6  | Risk of bias    | <a href="#">#15</a> Specify any assessment of risk of bias that may    | 5-6  |
| 7  |                 |                                                                        |      |
| 8  | across studies  | affect the cumulative evidence (e.g., publication                      |      |
| 9  |                 | bias, selective reporting within studies).                             |      |
| 10 |                 |                                                                        |      |
| 11 |                 |                                                                        |      |
| 12 |                 |                                                                        |      |
| 13 | Additional      | <a href="#">#16</a> Describe methods of additional analyses (e.g.,     | 8-12 |
| 14 |                 |                                                                        |      |
| 15 | analyses        | sensitivity or subgroup analyses, meta-regression),                    |      |
| 16 |                 | if done, indicating which were pre-specified.                          |      |
| 17 |                 |                                                                        |      |
| 18 |                 |                                                                        |      |
| 19 |                 |                                                                        |      |
| 20 |                 |                                                                        |      |
| 21 | Study selection | <a href="#">#17</a> Give numbers of studies screened, assessed for     | 7-8  |
| 22 |                 |                                                                        |      |
| 23 |                 | eligibility, and included in the review, with reasons                  |      |
| 24 |                 | for exclusions at each stage, ideally with a flow                      |      |
| 25 |                 | diagram.                                                               |      |
| 26 |                 |                                                                        |      |
| 27 |                 |                                                                        |      |
| 28 |                 |                                                                        |      |
| 29 |                 |                                                                        |      |
| 30 |                 |                                                                        |      |
| 31 | Study           | <a href="#">#18</a> For each study, present characteristics for which  | 8-12 |
| 32 |                 |                                                                        |      |
| 33 | characteristics | data were extracted (e.g., study size, PICOS,                          |      |
| 34 |                 | follow-up period) and provide the citation.                            |      |
| 35 |                 |                                                                        |      |
| 36 |                 |                                                                        |      |
| 37 |                 |                                                                        |      |
| 38 |                 |                                                                        |      |
| 39 | Risk of bias    | <a href="#">#19</a> Present data on risk of bias of each study and, if | 6    |
| 40 |                 |                                                                        |      |
| 41 | within studies  | available, any outcome-level assessment (see                           |      |
| 42 |                 | Item 12).                                                              |      |
| 43 |                 |                                                                        |      |
| 44 |                 |                                                                        |      |
| 45 |                 |                                                                        |      |
| 46 | Results of      | <a href="#">#20</a> For all outcomes considered (benefits and harms),  | 7-11 |
| 47 |                 |                                                                        |      |
| 48 | individual      | present, for each study: (a) simple summary data                       |      |
| 49 |                 | for each intervention group and (b) effect                             |      |
| 50 | studies         | estimates and confidence intervals, ideally with a                     |      |
| 51 |                 | forest plot.                                                           |      |
| 52 |                 |                                                                        |      |
| 53 |                 |                                                                        |      |
| 54 |                 |                                                                        |      |
| 55 |                 |                                                                        |      |
| 56 |                 |                                                                        |      |
| 57 |                 |                                                                        |      |
| 58 |                 |                                                                        |      |
| 59 |                 |                                                                        |      |
| 60 |                 |                                                                        |      |

|                                                                      |                             |                     |                                                                                                                                                                                      |                                |
|----------------------------------------------------------------------|-----------------------------|---------------------|--------------------------------------------------------------------------------------------------------------------------------------------------------------------------------------|--------------------------------|
| 1<br>2<br>3<br>4<br>5<br>6<br>7                                      | Synthesis of results        | <a href="#">#21</a> | Present the main results of the review. If meta-analyses are done, include for each, confidence intervals and measures of consistency.                                               | Not applicable to this review. |
| 8<br>9<br>10<br>11<br>12<br>13                                       | Risk of bias across studies | <a href="#">#22</a> | Present results of any assessment of risk of bias across studies (see Item 15).                                                                                                      | 4-5                            |
| 14<br>15<br>16<br>17<br>18<br>19<br>20<br>21                         | Additional analysis         | <a href="#">#23</a> | Give results of additional analyses, if done (e.g., sensitivity or subgroup analyses, meta-regression [see Item 16]).                                                                | Not applicable to this review. |
| 22<br>23<br>24<br>25<br>26<br>27<br>28<br>29<br>30<br>31             | Summary of Evidence         | <a href="#">#24</a> | Summarize the main findings, including the strength of evidence for each main outcome; consider their relevance to key groups (e.g., health care providers, users, and policy makers | 13-17                          |
| 32<br>33<br>34<br>35<br>36<br>37<br>38<br>39<br>40<br>41             | Limitations                 | <a href="#">#25</a> | Discuss limitations at study and outcome level (e.g., risk of bias), and at review level (e.g., incomplete retrieval of identified research, reporting bias).                        | 15-16                          |
| 42<br>43<br>44<br>45<br>46<br>47<br>48                               | Conclusions                 | <a href="#">#26</a> | Provide a general interpretation of the results in the context of other evidence, and implications for future research.                                                              | 16-17                          |
| 49<br>50<br>51<br>52<br>53<br>54<br>55<br>56<br>57<br>58<br>59<br>60 | Funding                     | <a href="#">#27</a> | Describe sources of funding or other support (e.g., supply of data) for the systematic review; role of funders for the systematic review.                                            | 18                             |

1 The PRISMA checklist is distributed under the terms of the Creative Commons Attribution License  
2  
3 CC-BY. This checklist can be completed online using <https://www.goodreports.org/>, a tool made by  
4  
5 the [EQUATOR Network](#) in collaboration with [Penelope.ai](#)  
6  
7  
8  
9  
10  
11  
12  
13  
14  
15  
16  
17  
18  
19  
20  
21  
22  
23  
24  
25  
26  
27  
28  
29  
30  
31  
32  
33  
34  
35  
36  
37  
38  
39  
40  
41  
42  
43  
44  
45  
46  
47  
48  
49  
50  
51  
52  
53  
54  
55  
56  
57  
58  
59  
60

For peer review only

# BMJ Open

**The Comprehensive Researcher Achievement Model  
(CRAM):  
a framework for measuring researcher achievement, impact  
and influence derived from a systematic literature review of  
metrics and models**

|                               |                                                                                                                                                                                                                                                                                                                                                                                                                                                                                                                                                                                                                                                                                                                                                                                                                                                                                                                                                                                                                                                                                                                                                                                                                                                                                                                                                                                                                                                                                                                                                                                                                                                                                                                                                                                                                                                                                                                                                                               |
|-------------------------------|-------------------------------------------------------------------------------------------------------------------------------------------------------------------------------------------------------------------------------------------------------------------------------------------------------------------------------------------------------------------------------------------------------------------------------------------------------------------------------------------------------------------------------------------------------------------------------------------------------------------------------------------------------------------------------------------------------------------------------------------------------------------------------------------------------------------------------------------------------------------------------------------------------------------------------------------------------------------------------------------------------------------------------------------------------------------------------------------------------------------------------------------------------------------------------------------------------------------------------------------------------------------------------------------------------------------------------------------------------------------------------------------------------------------------------------------------------------------------------------------------------------------------------------------------------------------------------------------------------------------------------------------------------------------------------------------------------------------------------------------------------------------------------------------------------------------------------------------------------------------------------------------------------------------------------------------------------------------------------|
| Journal:                      | <i>BMJ Open</i>                                                                                                                                                                                                                                                                                                                                                                                                                                                                                                                                                                                                                                                                                                                                                                                                                                                                                                                                                                                                                                                                                                                                                                                                                                                                                                                                                                                                                                                                                                                                                                                                                                                                                                                                                                                                                                                                                                                                                               |
| Manuscript ID                 | bmjopen-2018-025320.R2                                                                                                                                                                                                                                                                                                                                                                                                                                                                                                                                                                                                                                                                                                                                                                                                                                                                                                                                                                                                                                                                                                                                                                                                                                                                                                                                                                                                                                                                                                                                                                                                                                                                                                                                                                                                                                                                                                                                                        |
| Article Type:                 | Research                                                                                                                                                                                                                                                                                                                                                                                                                                                                                                                                                                                                                                                                                                                                                                                                                                                                                                                                                                                                                                                                                                                                                                                                                                                                                                                                                                                                                                                                                                                                                                                                                                                                                                                                                                                                                                                                                                                                                                      |
| Date Submitted by the Author: | 04-Feb-2019                                                                                                                                                                                                                                                                                                                                                                                                                                                                                                                                                                                                                                                                                                                                                                                                                                                                                                                                                                                                                                                                                                                                                                                                                                                                                                                                                                                                                                                                                                                                                                                                                                                                                                                                                                                                                                                                                                                                                                   |
| Complete List of Authors:     | <p>Braithwaite, Jeffrey; Macquarie University, Australian Institute of Health Innovation<br/> Herkes, Jessica; Macquarie University, Australian Institute of Health Innovation<br/> Churruca, Kate; Macquarie University, Australian Institute of Health Innovation; Macquarie University<br/> Long , Janet; Australian Institute of Health Innovation, Centre for Healthcare Resilience and Implementation Science<br/> Pomare, Chiara; Macquarie University Faculty of Medicine and Health Sciences, Australian Institute of Health Innovation<br/> Boyling, Claire; Macquarie University Faculty of Medicine and Health Sciences, Australian Institute of Health Innovation<br/> Bierbaum, Mia; Macquarie University, Australian Institute of Health Innovation<br/> Clay-Williams, Robyn; Macquarie University, Australian Institute of Health Innovation<br/> Rapport, Frances ; Macquarie University, Australian Institute of Health Innovation<br/> Shih, Patti; Macquarie University, Australian Institute of Health Innovation<br/> Hogden, Anne; Macquarie University, Australian Institute of Health Innovation<br/> Ellis, Louise A.; Macquarie University, Institute of Health Innovation<br/> Ludlow, Kristiana; Macquarie University, Australian Institute of Health Innovation<br/> Austin, Elizabeth; Macquarie University Faculty of Medicine and Health Sciences, Australian Institute of Health Innovation<br/> Seah, Rebecca; Macquarie University Faculty of Medicine and Health Sciences, Australian Institute of Health Innovation<br/> McPherson, Elise; Macquarie University, Australian Institute of Health Innovation<br/> Hibbert, Peter; Macquarie University Faculty of Medicine and Health Sciences, Faculty of Medicine and Health Sciences; University of South Australia Division of Health Sciences,<br/> Westbrook, Johanna; Macquarie University Faculty of Medicine and Health Sciences, Australian Institute of Health Innovation</p> |

1  
2  
3  
4  
5  
6  
7  
8  
9  
10  
11  
12  
13  
14  
15  
16  
17  
18  
19  
20  
21  
22  
23  
24  
25  
26  
27  
28  
29  
30  
31  
32  
33  
34  
35  
36  
37  
38  
39  
40  
41  
42  
43  
44  
45  
46  
47  
48  
49  
50  
51  
52  
53  
54  
55  
56  
57  
58  
59  
60

|                                   |                                                                                                                                       |
|-----------------------------------|---------------------------------------------------------------------------------------------------------------------------------------|
| <b>Primary Subject Heading:</b>   | Research methods                                                                                                                      |
| <b>Secondary Subject Heading:</b> | Health services research                                                                                                              |
| <b>Keywords:</b>                  | Researcher assessment, Research metrics, h-index, Journal impact factor, Comprehensive Researcher Achievement Model (CRAM), Citations |
|                                   |                                                                                                                                       |

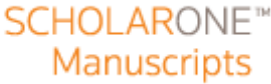

1  
2  
3 1 **The Comprehensive Researcher Achievement Model (CRAM):**  
4  
5 2 **a framework for measuring researcher achievement, impact and influence derived from**  
6  
7 3 **a systematic literature review of metrics and models**  
8  
9 4

10  
11 5 **Authors**

12 6 Professor Jeffrey Braithwaite (JB)\*<sup>1</sup>, BA, MIR (Hons), MBA, DipLR, PhD, FIML, FCHSM, FFPHRCP (UK),  
13 7 FACSS, Hon FRACMA, FAHMS

14 8 Ms Jessica Herkes (JH)<sup>1</sup>, BSc (Adv), MRes

15 9 Dr Kate Churruca (KC)<sup>1</sup>, BA (Hons) Psych, PhD

16 10 Dr Janet C Long (JCL)<sup>1</sup>, BSc (Hons), MN (Ed), CertOphNurs, PhD, FISQua

17 11 Ms Chiara Pomare (CP)<sup>1</sup>, BPsych (Hons), MRes

18 12 Ms Claire Boyling (CB)<sup>1</sup>, BHSc (Health Promotion)

19 13 Ms Mia Bierbaum (MB)<sup>1</sup>, BSc (Biomedical), B.Ed, Grad Dip TESOL, MPH

20 14 Dr Robyn Clay-Williams (RC-W)<sup>1</sup>, BEng, PhD

21 15 Professor Frances Rapport (FR)<sup>1</sup>, BA (Hons), Cert Ed, FRSA, MPhil, PhD

22 16 Dr Patti Shih (PS)<sup>1</sup>, BA(Hons), M.Pub.Pol., PhD

23 17 Dr Anne Hogden (AH)<sup>1</sup>, BA (Hons), B SpPath, PhD, FISQua

24 18 Dr Louise A Ellis (LAE)<sup>1</sup>, BPsych (Hons), PhD

25 19 Ms Kristiana Ludlow (KL)<sup>1</sup>, BPsych (Hons), MRes

26 20 Dr Elizabeth Austin (EA)<sup>1</sup>, BA (Hons) Psych, PhD

27 21 Ms Rebecca Seah (RS)<sup>1</sup>, BSc Psychology (Hons I) Bcomm

28 22 Ms Elise McPherson (EM)<sup>1</sup>, BA, BSc(Hons)

29 23 Mr Peter Hibbert (PH)<sup>1</sup>, B.App.Sc (Physio), Grad.Dip. Comp, Grad.Dip. Econ, FAAQHC

30 24 Professor Johanna I Westbrook (JIW)<sup>1</sup>, BAppSc, GradDipAppEpid, MHA, PhD

31 25

32 26 <sup>1</sup>Australian Institute of Health Innovation, Macquarie University, Sydney, Australia

33 27

34 28 **\*Corresponding Author**

35 29 Level 6, 75 Talavera Rd

36 30 Macquarie University, North Ryde

37 31 New South Wales, Australia, 2109

38 32 e: Jeffrey.braithwaite@mq.edu.au

39 33

## 34 **ABSTRACT**

35 **Objectives** Effective researcher assessment is key to decisions about funding allocations,  
36 promotion and tenure. We aimed to identify what is known about methods for assessing  
37 researcher achievements, leading to a new composite assessment model.

38 **Design** We systematically reviewed the literature via the Preferred Reporting Items for  
39 Systematic Review and Meta-Analysis Protocols (PRISMA-P) framework.

40 **Data sources** All Web of Science databases (including Core Collection, MEDLINE, and  
41 BIOSIS Citation Index) to the end of 2017.

42 **Eligibility criteria** (1) English language, (2) published in the last 10 years (2007-2017), (3)  
43 full text was available, and (4) the article discussed an approach to the assessment of an  
44 individual researcher's achievements.

45 **Data extraction and synthesis** Articles were allocated amongst four pairs of reviewers for  
46 screening, with each pair was randomly assigned 5% of their allocation to review  
47 concurrently against inclusion criteria, with inter-rater reliability assessed using Cohen's  
48 Kappa ( $\kappa$ ). The  $\kappa$  statistic showed agreement ranged from moderate to almost perfect  
49 (0.4848-0.9039). Following screening, selected articles underwent full text review and bias  
50 assessed.

51 **Results** Four hundred and seventy-eight articles were included in the final review.  
52 Established approaches developed prior to our inclusion period (e.g., citations and outputs, h-  
53 index, journal impact factor), remained dominant in the literature and in practice. New  
54 bibliometric methods and models emerged in the last 10 years including: measures based on  
55 PageRank algorithms or "altmetric" data, methods to apply peer judgement, and techniques to  
56 assign values to publication quantity and quality. Each assessment method tended to  
57 prioritize certain aspects of achievement over others.

58 **Conclusions** All metrics and models focus on an element or elements, at the expense of  
59 others. A new composite design, the Comprehensive Researcher Achievement Model  
60 (CRAM) is presented which supersedes past anachronistic models. The CRAM is modifiable  
61 to a range of applications.

62 **Keywords:** Researcher assessment; Research metrics; h-index; Journal impact factor;  
63 citations; outputs; Comprehensive Researcher Achievement Model (CRAM)

## 65 **Article Summary**

### 66 **Strengths and limitations of this study**



- 1  
2  
3 67 • A large, diverse dataset of over 478 articles, containing many ideas for assessing  
4 researcher performance, was analyzed  
5 68  
6  
7 69 • Strengths of the review include executing a wide-ranging search strategy, and the  
8 consequent high number of included articles for review; the results are limited by the  
9 70 literature itself, e.g., new metrics were not mentioned in the articles, and therefore not  
10 71 captured in the results  
11  
12 72  
13  
14 73 • A new model combining multiple factors to assess researcher performance is now  
15 available  
16 74  
17 75 • Its strengths include combining quantitative and qualitative components in the one  
18 model  
19 76  
20  
21 77 • The CRAM model, despite being evidence-oriented, is a generic one and now needs  
22 to be applied in the field  
23 78  
24  
25  
26  
27  
28  
29  
30  
31  
32  
33  
34  
35  
36  
37  
38  
39  
40  
41  
42  
43  
44  
45  
46  
47  
48  
49  
50  
51  
52  
53  
54  
55  
56  
57  
58  
59  
60

## 79 INTRODUCTION

80 Judging researchers' achievements and academic impact continues to be an important means  
81 of allocating scarce research funds and assessing candidates for promotion or tenure. It has  
82 historically been carried out through some form of expert peer judgement, to assess the  
83 number and quality of outputs, and in more recent decades, citations to them. This approach  
84 requires judgements regarding the weight which should be assigned to the number of  
85 publications, their quality, where they were published, and their downstream influence or  
86 impact. There are significant questions about the extent to which human judgement based on  
87 these criteria is an effective mechanism for making these complex assessments in a consistent  
88 and unbiased way.(1-3) Criticisms of peer assessment, even when underpinned by relatively  
89 impartial productivity data, include the propensity for bias, inconsistency among reviewers,  
90 nepotism, group-think and subjectivity.(4-7)

91 To compensate for these limitations, approaches have been proposed that rely less on  
92 subjective judgement and more on objective indicators.(3, 8-10) Indicators of achievement  
93 focus on one or a combination of four aspects: quantity of researcher outputs (*productivity*);  
94 value of outputs (*quality*); outcomes of research outputs (*impact*); and relations between  
95 publications or authors and the wider world (*influence*).(11-15) Online publishing of journal  
96 articles has provided the opportunity to easily track citations and user interactions (e.g.,  
97 number of article downloads) and thus has provided a new set of indices against which  
98 individual researchers, journals and articles can be compared and the relative worth of  
99 contributions assessed and valued.(14) These relatively new metrics have been collectively  
100 termed *bibliometrics*(16) when based on citations and numbers of publications, or  
101 *altmetrics*(17) when calculated by alternative online measures of impact such as number of  
102 downloads or social media mentions.(16)

103 The most established metrics for inferring researcher achievement are the h-index and  
104 the Journal Impact Factor (JIF). The JIF measures the average number of citations of an  
105 article in the journal over the previous year, and hence is a good indication of journal quality  
106 but is increasingly regarded as a primitive measure of quality for individual researchers.(18)  
107 The h-index, proposed by Hirsch in 2005,(19) attempts to portray a researcher's productivity  
108 and impact in one data point. The h-index is defined as the number (*h*) of articles published  
109 by a researcher that have received a citation count of at least *h*. Use of the h-index has  
110 become widespread, reflected in its inclusion in author profiles on online databases such as  
111 Google Scholar and Scopus.

1  
2  
3 112 Also influenced by the advent of online databases, there has been a proliferation of  
4  
5 113 other assessment models and metrics,(16) many of which purport to improve upon existing  
6  
7 114 approaches.(20, 21) These include methods that assess the impact of articles measured by:  
8  
9 115 downloads or online views received; practice change related to specific research; take-up by  
10  
11 116 the scientific community; or mentions in social media.

12 117 Against the backdrop of growth in metrics and models for assessing researchers'  
13  
14 118 achievements, there is a lack of guidance on the relative strengths and limitations of these  
15  
16 119 different approaches. Understanding them is of fundamental importance to funding bodies  
17  
18 120 that drive the future of research, tenure and promotion committees, and more broadly for  
19  
20 121 providing insights into how we recognize and value the work of science and scientists,  
21  
22 122 particularly those researching in medicine and healthcare. This review aimed to identify  
23  
24 123 approaches to assessing researchers' achievements published in the academic literature over  
25  
26 124 the last 10 years, considering their relative strengths and limitations and drawing on this to  
27  
28 125 propose a new composite assessment model.  
29  
30 126

## 31 127 **METHOD**

### 32 128 **Search Strategy**

33  
34 129 All Web of Science databases (eight in total, including Web of Science Core Collection,  
35  
36 130 MEDLINE, and BIOSIS Citation Index) were searched using terms related to researcher  
37  
38 131 achievement (*researcher excellence, track record, researcher funding, researcher perform\**,  
39  
40 132 *relative to opportunity, researcher potential, research\* career pathway, academic career*  
41  
42 133 *pathway, funding system, funding body, researcher impact, scientific\* productivity, academic*  
43  
44 134 *productivity, top researcher, researcher ranking, grant application, researcher output,*  
45  
46 135 *h\*index, i\*index, impact factor, individual researcher*) and approaches to its assessment  
47  
48 136 (*model, framework, assess\*, evaluat\*, \*metric\*, measur\*, criteri\*, citation\*, unconscious*  
49  
50 137 *bias, rank\**) with “\*” used as an unlimited truncation to capture variation in search terms, as  
51  
52 138 seen in **Appendix 1**. These two searches were combined (using “and”) and results were  
53  
54 139 downloaded into EndNote, the reference management software.

### 55 140 **Study Selection**

56  
57 141 After removing duplicate references in EndNote,(22) articles were allocated amongst pairs of  
58  
59 142 reviewers (MB-JCL, CP-CB, KL-JH, KC-LAE) for screening against inclusion criteria.  
60  
143 Following established procedures,(23, 24) each pair was randomly assigned 5% of their

1  
2  
3 144 allocation to review concurrently against inclusion criteria, with inter-rater reliability  
4  
5 145 assessed using Cohen's Kappa ( $\kappa$ ). The  $\kappa$  statistic was calculated for pairs of researchers, with  
6  
7 146 agreement ranging from moderate to almost perfect (0.4848-0.9039).(25) Following the  
8  
9 147 abstract and title screen, selected articles underwent full text review. Reasons for exclusion  
10  
11 148 were recorded.

### 12 13 149 **Inclusion Criteria**

14  
15 150 The following inclusion criteria were operationalized: (1) English language, (2) published in  
16  
17 151 the last 10 years (2007-2017), (3) full text for the article was available, and (4) the article  
18  
19 152 discussed an approach to the assessment of an individual researcher's achievements (at the  
20  
21 153 researcher or singular output-level). The research followed the Preferred Reporting Items for  
22  
23 154 Systematic Review and Meta-Analysis Protocols (PRISMA-P) framework.(26) Empirical and  
24  
25 155 non-empirical articles were included, because many articles proposing new approaches to  
26  
27 156 assessment, or discussing the limitations of existing ones, are not level one evidence or  
28  
29 157 research-based. Both quantitative and qualitative studies were included.

### 30 158 **Data Extraction**

31  
32 159 Data from the included articles were extracted, including: the country of article origin, the  
33  
34 160 characteristics of the models or metrics discussed, the perspective the article presented on the  
35  
36 161 metric or model (positive, negative, indeterminable) including any potential benefits or  
37  
38 162 limitations of the assessment model (and if these were perceived or based on some form of  
39  
40 163 evidence). A customised data extraction sheet was developed in Microsoft Excel, trialed  
41  
42 164 among members of the research team and subsequently refined. This information was  
43  
44 165 synthesized for each model and metric identified through narrative techniques. The  
45  
46 166 publication details and classification of each paper are contained in **Appendix 2**.

### 47 167 **Appraisal of the Literature**

48  
49 168 Due to the prevalence of non-empirical articles in this field (e.g., editorial contributions,  
50  
51 169 commentaries), it was determined that a risk of bias tool such as the Quality Assessment Tool  
52  
53 170 could not be applied.(27) Rather, assessors were trained in multiple meetings (October 24,  
54  
55 171 October 30, November 13, 2017) to critically assess the quality of articles. Given the topic of  
56  
57 172 the review (focusing on the publication process), the type of models and metrics identified  
58  
59 173 (i.e., more metrics that use publication metrics) may influence the cumulative evidence and  
60

1  
2  
3 174 subsequently create a risk of bias. In addition, three researchers (JH, EM, CB) reviewed every  
4  
5 175 included article, to extract documented conflicts of interests of authors.  
6  
7

## 8 176 **Patient and public involvement**

9 177 Patients and the public were not involved in this systematic review.  
10

## 11 178 **RESULTS**

12  
13  
14 179 The final dataset consisted of 478 academic articles. The data screening process is presented  
15  
16 180 in **Figure 1**.

### 17 181 **Figure 1. Data screening and extraction process for academic articles**

18 182 <Insert Figure 1>

19  
20  
21 183 Of the 478 included papers (see **Appendix 2** for a summary), 295 (61.7%) had an  
22  
23 184 empirical component, which ranged from interventional studies that assessed researcher  
24  
25 185 achievement as an outcome measure (e.g., a study measuring the outcomes of a training  
26  
27 186 program),(28) as a predictor(29-31) (e.g., a study that demonstrated the association between  
28  
29 187 number of citations early in one's career and later career productivity), or reported a  
30  
31 188 descriptive analysis of a new metric.(32, 33) One hundred and sixty-six (34.7%) papers were  
32  
33 189 not empirical, including editorial or opinion contributions that discussed the assessment of  
34  
35 190 research achievement, or proposed models for assessing researcher achievement. Seventeen  
36  
37 191 papers (3.6%) were reviews that considered one or more elements of assessing researcher  
38  
39 192 achievements. The quality of these contributions ranged in terms of the risk of bias in the  
40  
41 193 viewpoint expressed. Only for 19 papers (4.0%) did the authors declare a potential conflict of  
42  
43 194 interest.

44  
45 195 Across the study period, 78 articles (16.3%) involved authors purporting to propose  
46  
47 196 new models or metrics. Most articles described or cited pre-existing metrics and largely  
48  
49 197 discussed their perceived strengths and limitations. **Figure 2** shows the proportion of positive  
50  
51 198 or negative discussions of five of the most common approaches to assessing an individual's  
52  
53 199 research achievement (altmetrics, peer-review, h-index, simple counts, and JIF). The  
54  
55 200 approach with most support was altmetrics (51.0% of articles mentioning altmetrics). The JIF  
56  
57 201 was discussed with mostly negative sentiments in relevant articles (69.4%).  
58  
59 202

### 60 203 **Figure 2. Percentages of positive and negative discussion regarding selected commonly 204 used metrics for assessing individual researchers (n=478 articles)**

205 <Insert Figure 2>

206 Legend: Positive discussion refers to articles that discuss the metric in a favorable light or focus on the strengths  
207 of the metric; negative discussion refers to articles that focus on the limitations or shortcomings of the metric.

## 208 **Citation-Based Metrics**

### 209 *Publication and Citation Counts*

210 One hundred and fifty-three papers (32.0%) discussed the use of publication and citation  
211 counts for purposes of assessing researcher achievement, with papers describing them as a  
212 simple “traditional but somewhat crude measure”,(34) as well as the building blocks for other  
213 metrics.(35) A researcher’s number of publications, commonly termed an n-index,(36) was  
214 suggested by some to indicate researcher productivity,(14) rather than quality, impact or  
215 influence of these papers.(37) On the other hand, the literature suggested that numbers of  
216 citations indicated the academic impact of an individual publication or researcher’s body of  
217 work, calculated as an author’s cumulative or mean citations per article.(38) Some studies  
218 found support for the validity of citation counts and publications in that they were correlated  
219 with other indications of a researcher’s achievement, such as awards and grant funding,(39,  
220 40) and predictive of long term success in a field.(41) For example, one paper argued that  
221 having larger numbers of publications and being highly cited early in one’s career predicted  
222 later high quality research.(42)

223 A number of limitations of using citation or publication counts was observed. For  
224 example, Minasny et al. (2013) highlighted discrepancies between publications and citations  
225 counts in different databases because of their differential structures and inputs.(43) Other  
226 authors(38, 44, 45) noted that citation patterns vary by discipline, which they suggested can  
227 make them inappropriate for comparing researchers from different fields. Average citations  
228 per publication were reported as highly sensitive to change or could be skewed if, for  
229 example, a researcher has one heavily-cited article.(46, 47) A further disadvantage is the lag-  
230 effect of citations,(48, 49) and that in most models citations and publications count equally  
231 for all co-authors, despite potential differential contributions.(50) Some also questioned the  
232 extent to which citations actually indicated quality or impact, noting that a paper may  
233 influence clinical practice more than academic thinking.(51) Indeed, a paper may be highly  
234 cited because it is useful (e.g., a review), controversial, or even by chance, making citations a  
235 limited indication of quality or impact.(40, 50, 52) In addition to limitations, numerous  
236 authors made the point that focusing on citation and publication counts can have unintended,  
237 negative consequences for the assessment of researcher achievement, potentially leading to  
238 gaming and manipulation, including self-citations and gratuitous authorship.(53, 54)



### 239 *Singular Output-Level Approaches*

240 Forty-one papers (8.6%) discussed models and metrics at the singular output or article-level  
241 that could be used to infer researcher achievement. The components of achievement they  
242 reported assessing were typically quality or impact.<sup>(55, 56)</sup> For example, some papers  
243 reported attempts to examine the quality of a single article by assessing its content.<sup>(57, 58)</sup>  
244 Among the metrics identified in the literature, the immediacy index (II) focused on impact by  
245 measuring the average number of cites an article received in the year it was published.<sup>(59)</sup>  
246 Similarly, Finch suggested adapting the Source Normalized Impact per Publication (SNIP; a  
247 metric used for journal-level calculations across different fields of research) to the article-  
248 level.<sup>(21)</sup>

249 Many of the article-level metrics identified could also be upscaled to produce  
250 researcher-level indications of academic impact. For example, the sScientific currENcy  
251 Tokens (CENTs), proposed by Szymanski et al. (2012), involved giving a “cent” for each  
252 new non-self-citation a publication received; CENTs are then used as the basis for the  
253 researcher-level i-index, which follows a similar approach as the h-index, but removes self-  
254 citations.<sup>(60)</sup> The TAPSIF (Temporally-Averaged Paper-Specific Impact Factor) calculates an  
255 article’s average number of citations per year combined with bonus cites for the publishing  
256 journal’s prestige, and can be aggregated to measure the overall relevance of a researcher  
257 (Temporally Averaged Author-Specific Impact Factor; TAASIF).<sup>(61)</sup>

### 258 *Journal impact factor*

259 The JIF, commonly recognized as a journal-level measure of quality,<sup>(59, 62-64)</sup> was  
260 discussed in 211 (44.1%) of the papers reviewed in relation to assessing singular outputs or  
261 individual researchers. A number of papers described the JIF being used informally to assess  
262 an individual’s research achievement at the singular output-level, and formally in countries  
263 such as France and China.<sup>(65)</sup> It implies article quality because it is typically a more  
264 competitive process to publish in journals with high impact factors.<sup>(66)</sup> Indeed, the JIF was  
265 found to be the best predictor of a paper’s propensity to receive citations.<sup>(67)</sup>

266 The JIF has a range of limitations when used to indicate journal quality,<sup>(68)</sup> including  
267 that it is disproportionately affected by highly cited, outlier articles,<sup>(41, 69)</sup> and is susceptible  
268 to “gaming” by editors.<sup>(17, 70)</sup> Other criticisms focused on using the JIF to assess individual  
269 articles or the researchers who author them.<sup>(71)</sup> Some critics claimed that using the JIF to  
270 measure an individual’s achievement encourages researchers to publish in higher-impact but

1  
2  
3 271 less-appropriate journals for their field—which ultimately means their article may not be read  
4  
5 272 by relevant researchers.(72, 73) Furthermore, the popularity of a journal was argued to be a  
6  
7 273 poor indication of the quality of any one article, with the citation distributions for calculating  
8  
9 274 JIF found to be heavily skewed (i.e., a small subset of papers receive the bulk of the citations  
10  
11 275 while some may receive none).(18) Ultimately, many commentators argued that the JIF is an  
12  
13 276 inappropriate metric to assess individual researchers because it is an aggregate metric of a  
14  
15 277 journal’s publication, and expresses nothing about any individual paper.(21, 49, 50, 74)  
16  
17 278 However, Bornmann et al. (2017) suggested one case in which it would be appropriate to use  
18  
19 279 JIF for assessing individual researchers: in relation to their recently published papers that had  
20  
21 280 not had the opportunity to accumulate citations.(75)

## 21 281 ***Researcher-Level Approaches***

### 22 282 *h-index*

23  
24  
25  
26 283 The h-index was among the most commonly discussed metrics in the literature (254 [53.1%]  
27  
28 284 of the papers reviewed); in many of these papers, it was described by authors as more  
29  
30 285 sophisticated than citation and publication counts, but still straightforward, logical and  
31  
32 286 intuitive.(76-78) Authors noted its combination of productivity (h publications) and impact  
33  
34 287 indicators (h citations) as being more reliable(79, 80) and stable than average citations per  
35  
36 288 publications(41) because it is not skewed by the influence of one popular article.(81) One  
37  
38 289 study found that the h-index correlated with other metrics more difficult to obtain.(78) It also  
39  
40 290 showed convergent validity with peer-reviewed assessments(82) and was found to be a good  
41  
42 291 predictor of future achievement.(41)

43  
44 292 However because of the lag-effect with citations and publications, the h-index  
45  
46 293 increases with a researcher’s years of activity in the field, and cannot decrease, even if  
47  
48 294 productivity later declines.(83) Hence, numerous authors suggested it was inappropriate for  
49  
50 295 comparing researchers at different career stages,(84) or those early in their career.(70) The h-  
51  
52 296 index was also noted as being susceptible to many of the critiques leveled against citation  
53  
54 297 counts, including potential for gaming, and inability to reflect differential contributions by  
55  
56 298 co-authors.(85) Because disciplines differ in citation patterns(86) some studies noted  
57  
58 299 variations in author h-indices between different methodologies(87) and within medical  
59  
60 300 subspecialties.(88) Some therefore argued that the h-index should not be used as the sole  
301  
302 301 measure of a researcher’s achievement.(88)

### 302 302 *h-index variants*



1  
2  
3 303 A number of modified versions of the h-index were identified; these purported to draw on its  
4  
5 304 basic strengths of balancing productivity with impact while redressing perceived limitations.  
6  
7 305 For example, the g-index measures global citation performance,(89) and was defined  
8  
9 306 similarly to the h-index but with more weight given to highly cited articles by assuming the  
10  
11 307 top g articles have received at least  $g^2$  citations.(90) Azer and Azer (2016) argued it was a  
12  
13 308 more useful measure of researcher productivity.(91) Another variant of the h-index identified,  
14  
15 309 the m-quotient, was suggested to minimize the potential to favor senior academics by  
16  
17 310 accounting for the time passed since a researcher has begun publishing papers.(92, 93) Other  
18  
19 311 h-index variations reported in the articles reviewed attempted to account for author  
20  
21 312 contributions, such as the h-maj index, which includes only articles in which the researcher  
22  
23 313 played a core role (based on author order); and the weighted h-index, which assigns credit  
24  
25 314 points according to author order.(89, 94)

### 315 *Recurring Issues with Citation-Based Metrics*

316 The literature review results suggested that no one citation-based metric was ideal for all  
317  
318 purposes. All of the common metrics examined focused on one aspect of an individual's  
319  
320 achievement, and thus failed to account for other aspects of achievement. The limitations  
321  
322 with some of the frequently used citation-based metrics are listed in **Box 1**.

320

#### 321 **Box 1. Common limitations in the use of citation-based metrics**

1. Challenges with reconciling differences in citation patterns across varying fields of study
2. Time-dependency issues stemming from differences in career length of researchers
3. Prioritizing impact over merit, or quality over quantity, or vice versa
4. The lag-effect of citations
5. Gaming and the ability of self-citation to distort metrics
6. Failure to account for author order
7. Contributions from authors to a publication are viewed as equal when they may not be
8. Perpetuate “publish or perish” culture
9. Potential to stifle innovation in favor of what is popular

322

### 323 **Non-Citation Based Approaches**

324 *altmetrics*

1  
2  
3 325 In contradistinction with the metrics discussed above, fifty-four papers (11.3%) discussed  
4 326 altmetrics (or “alternative metrics”), which included a wide range of techniques to measure  
5 327 non-traditional, non-citation based usage of articles, that is, influence.(17) Altmetric  
6 328 measures included the number of online article views,(95) bookmarks,(96) downloads,(41)  
7 329 PageRank algorithms(97) and attention by mainstream news,(65) in books(98) and social  
8 330 media, for example, in blogs, commentaries, online topic reviews or tweets.(99, 100) These  
9 331 metrics typically measure the “web visibility” of an output.(101) A notable example is the  
10 332 social networking site for researchers and scientists, ResearchGate, which uses an algorithm  
11 333 to score researchers based on the use of their outputs, including citations, reads, and  
12 334 recommendations.(102)

13 335 A strength of altmetrics lies in providing a measure of influence promptly after  
14 336 publication.(70, 103, 104) Moreover, altmetrics allows tracking of the downloads of multiple  
15 337 sources (e.g., students, the general public, clinicians, as well as academics) and multiple types  
16 338 of format (e.g., reports and policy documents),(105) which are useful in gauging a broader  
17 339 indication of impact or influence, compared to more traditional metrics that solely or largely  
18 340 measure acknowledgement by experts in the field through citations.(17)

19 341 Disadvantages noted in the articles reviewed included that altmetrics calculations  
20 342 have been established by commercial enterprises such as *Altmetrics LLC (London, UK)* and  
21 343 other competitors,(106) and there may be fees levied for their use. The application of these  
22 344 metrics has also not been standardized.(98) Furthermore, it has been argued that, because  
23 345 altmetrics are cumulative and typically at the article-level, they provide more an indication of  
24 346 influence or even popularity,(107) instead of quality or productivity.(108) Hence, one study  
25 347 suggested no correlation between attention on Twitter and expert analysis of an article’s  
26 348 originality, significance or rigour.(109) Another showed that Tweets predict citations.(110)  
27 349 Overall, further work needs to assess the value of altmetric scores in terms of their  
28 350 association with other traditional indicators of achievement.(111) Notwithstanding this, there  
29 351 were increasing calls to consider altmetrics alongside more conventional metrics in assessing  
30 352 researchers and their work.(112)

31 353

### 32 354 ***Past Funding***

33 355 A past record of being funded by national agencies was identified as a common measurement  
34 356 of individual academic achievement (particularly productivity, quality and impact) in a  
35 357 number of papers, and has been argued to be a reliable method that is consistent across

1  
2  
3 358 medical research.(113-115) For example, the NIH's (National Institute of Health's) RePORT  
4  
5 359 (Research Portfolio Online Reporting Tools) system encourages public accountability for  
6  
7 360 funding by providing online access to reports, data and NIH-funded research projects.(113,  
8  
9 361 116)

10 362

### 11 363 **New Metrics and Models Identified**

12  
13  
14 364 The review also identified and assessed new metrics and models that were proposed during  
15  
16 365 the review period, many of which had not gained widespread acceptance or use. While there  
17  
18 366 was considerable heterogeneity and varying degrees of complexity among the 78 new  
19  
20 367 approaches identified, there were also many areas of overlap in their methods and purposes.  
21  
22 368 For example, some papers reported on metrics that used a PageRank algorithm,(117, 118) a  
23  
24 369 form of network analysis based on structural characteristics of publications (e.g., co-  
25  
26 370 authorship or citation patterns).(14) Metrics based on PageRank purported to measure both  
27  
28 371 the direct and indirect impact of a publication or researcher. Other approaches considered the  
29  
30 372 relative contributions of authors to a paper in calculating productivity.(119) Numerous  
31  
32 373 metrics and models that built upon existing approaches were also reported.(120) For example,  
33  
34 374 some developed composite metrics that included a publication's JIF alongside an author  
35  
36 375 contribution measure(121) or other existing metrics.(122) However, each of these approaches  
37  
38 376 reported limitations, in addition to their strengths or improvements upon other methods. For  
39  
40 377 example, in focusing on productivity, a metric necessarily often neglected impact.(123)  
41  
42 378 **Appendix 3** provides a summary of these new or re-fashioned metrics and models, with  
43  
44 379 details of their basis and purpose.

45 380

46 381

### 47 382 **DISCUSSION**

48  
49 383 This systematic review identified a large number of diverse metrics and models for assessing  
50  
51 384 an individual's research achievement that have been developed in the last 10 years (2007-  
52  
53 385 2017), as evidenced in **Appendix 3**. At the same time, other approaches that pre-dated our  
54  
55 386 study time period of 2007-2017 were also discussed frequently in the literature reviewed,  
56  
57 387 including the h-index and JIF. All metrics and models proposed had their relative strengths,  
58  
59 388 based on the components of achievement they focused on, and their sophistication or  
60  
389 transparency.

1  
2  
3 390 The review also identified and assessed new metrics and over the past few decades.  
4  
5 391 Peer-review has been increasingly criticized for reliance on subjectivity and propensity for  
6  
7 392 bias,(7) and there have been arguments that the use of specific metrics may be a more  
8  
9 393 objective and fair approach for assessing individual research achievement. However, this  
10  
11 394 review has highlighted that even seemingly objective measures have a range of shortcomings.  
12  
13 395 For example, there are inadequacies in comparing researchers at different career stages, and  
14  
15 396 across disciplines with different citation patterns.(86) Furthermore, the use of citation-based  
16  
17 397 metrics can lead to gaming and potential ethical misconduct by contributing to a “publish or  
18  
19 398 perish” culture in which researchers are under pressure to maintain or improve their  
20  
21 399 publication records.(124, 125) New methods and adjustments to existing metrics have been  
22  
23 400 proposed to explicitly address some of these limitations; for example, normalizing metrics  
24  
25 401 with “exchange rates” to remove discipline-specific variation in citation patterns, thereby  
26  
27 402 making metric scores more comparable for researchers working in disparate fields.(126, 127)  
28  
29 403 Normalization techniques have also been used to assess researchers’ metrics with greater  
30  
31 404 recognition of their relative opportunity and career longevity.(128)

32  
33 405 Other criticisms of traditional approaches center less on how they calculated  
34  
35 406 achievement, and more on what they understood or assumed about its constituent elements.  
36  
37 407 In this review, the measurement of impact or knowledge gain was often exclusively tied to  
38  
39 408 citations.(129) Some articles proposed novel approaches to using citations as a measure of  
40  
41 409 impact, such as giving greater weight to citations from papers that were themselves highly  
42  
43 410 cited(130) or that come from outside the field in which the paper was published.(131)  
44  
45 411 However, even other potential means of considering scientific contributions and achievement,  
46  
47 412 such as mentoring, were still ultimately tied to citations because mentoring was measured by  
48  
49 413 the publication output of mentees.(132)

50  
51 414 A focus only on citations was widely thought to disadvantage certain types of  
52  
53 415 researchers. For example, researchers who aim to publish with a focus on influencing practice  
54  
55 416 may target more specialized or regional journals that do not have high JIFs, where their  
56  
57 417 papers will be read by the appropriate audience and findings implemented, but they may not  
58  
59 418 be well-cited.(51) In this regard, categorizing the type of journal in which an article has been  
60  
419 published in terms of its focus (e.g., industry, clinical, regional/national) may go some way  
420 toward recognizing those publications that have a clear knowledge translation intention, and  
421 therefore prioritize real-world impact over academic impact.(124) There were only a few  
422 other approaches identified that captured broader conceptualizations of knowledge gain, such  
423 as practical impact or wealth generation for the economy, and these too were often simplistic,

1  
2  
3 424 such as including patents and their citations(133) or altmetric data.(98) While altmetrics hold  
4  
5 425 potential in this regard, their use has not been standardized,(98) and they come with their own  
6  
7 426 limitations, with suggestions that they reflect popularity more so than real world impact.(107)  
8  
9 427 Other methodologies have been proposed for assessing knowledge translation and real-world  
10  
11 428 impact, but these can often be labor intensive.(134) For example, Sutherland et al.  
12  
13 429 (2011)(135) suggested that assessing individual research outputs in light of specific policy  
14  
15 430 objectives, through peer-review based scoring, may be a strategy, but this is typically not  
16  
17 431 feasible in situations such as grant funding allocation, where there are time-constraints and  
18  
19 432 large applicant pools to assess.

20  
21 433 In terms of how one can make sense of the validity of many of these emerging  
22  
23 434 approaches for assessing an individual's research achievements, metrics should demonstrate  
24  
25 435 their legitimacy empirically, as well as having a theoretical basis for their use and clearly  
26  
27 436 differentiating what aspects of quality, achievement or impact they purport to examine.(55,  
28  
29 437 67) If the recent, well-publicized(136-138) San Francisco Declaration on Research  
30  
31 438 Assessment (DORA)(139) is anything to go by, internationally there is a move away from the  
32  
33 439 assessment of individual researchers using the JIF and the journal in which the research has  
34  
35 440 been published.

36  
37  
38  
39  
40  
41  
42  
43  
44  
45  
46  
47  
48  
49  
50  
51  
52  
53  
54  
55  
56  
57  
58  
59  
60

### 442 **Figure 3. The Comprehensive Researcher Achievement Model (CRAM)**

443 <Insert Figure 3>

444 There is momentum, instead, for assessment of researcher achievements on the basis  
445 of a wider mix of measures, hence our proposed Comprehensive Researcher Achievement  
446 Model (CRAM) (**Figure 3**). On the left-hand side of this model is the researcher to be  
447 assessed, and key characteristics that influence the assessment. Among these factors, some  
448 (i.e., field or discipline, co-authorship, career longevity) can be controlled for depending on  
449 the metric, while other components, such as gaming or the research topic (i.e., whether it is  
450 “trendy” or innovative) are less amenable to control or even prediction. Online databases,  
451 which track citations and downloads and measure other forms of impact, hold much potential  
452 and will likely be increasingly used in the future to assess both individual researchers and  
453 their outputs. Hence, assessment components (past funding, articles, citations, patents,  
454 downloads, and some media traction) included in our model are those primarily accessible  
455 online.

### 456 **Strengths and Limitations**

1  
2  
3 457 The findings of this review suggest assessment components should be used with care, and  
4  
5 458 with recognition of how they can be influenced by other factors, and what aspects of  
6  
7 459 achievement they reflect (i.e., productivity, quality, impact, influence). No metric or model  
8  
9 460 singularly captures all aspects of achievement, and hence use of a range, such as the  
10  
11 461 examples in our model, is advisable. CRAM recognizes that the configuration and weighting  
12  
13 462 of assessment methods will depend on the assessors and their purpose, the resources available  
14  
15 463 for the assessment process, and access to assessment components. Our results must be  
16  
17 464 interpreted in light of our focus on academic literature. The limits of our focus on peer-  
18  
19 465 reviewed literature were evident in the fact some new metrics were not mentioned in articles,  
20  
21 466 and therefore not captured in our results. While we defined impact broadly at the outset,  
22  
23 467 overwhelmingly the literature we reviewed focused on academic, citation-based impact.  
24  
25 468 Furthermore, although we assessed bias in the ways documented, the study design limited our  
26  
27 469 ability to apply a standardized quality assessment tool. A strength of our focus was that we  
28  
29 470 set no inclusion criteria with regard to scientific discipline, because novel and useful  
30  
31 471 approaches to assessing research achievement can come from diverse fields. Many of the  
32  
33 472 articles we reviewed were broadly in the area of health and medical research, and our  
34  
35 473 discussion is concerned with the implications for health and medical research, as this is where  
36  
37 474 our interests lie.  
38  
39 475

## 476 **CONCLUSION**

477 There is no ideal model or metric by which to assess individual researcher achievement. We  
478  
479 have proposed a generic model, designed to minimize risk of the use of any one or a smaller  
480  
481 number of metrics, but it is not proposed as an ultimate solution. The mix of assessment  
482  
483 components and metrics will depend on the purpose. Greater transparency in approaches used  
484  
485 to assess achievement including their evidence-base is required.(37) Any model used to  
486  
487 assess achievement for purposes such as promotion or funding allocation should include  
488  
489 some quantitative components, based on robust data, and be able to be rapidly updated,  
490  
491 presented with confidence intervals, and normalized.(37) The assessment process should be  
492  
493 difficult to manipulate, and explicit about the components of achievement being measured.  
494  
495 As such, no current metric suitably fulfills all these criteria. The best strategy to assess an  
496  
497 individual's research achievement is likely to involve the use of multiple approaches(140) in  
498  
499 order to dilute the influence and potential disadvantages of any one metric, while providing  
500  
501

1  
2  
3 489 more rounded picture of a researcher's achievement;(85, 141) this is what the CRAM aims to  
4  
5 490 contribute.

6 491 All-in-all, achievement in terms of impact and knowledge gain is broader than the  
7  
8 492 number of articles published or their citation rates, and yet most metrics have no means of  
9  
10 493 factoring in these broader issues. Altmetrics hold promise in complementing citation-based  
11  
12 494 metrics and assessing more diverse notions of impact, but usage of this type of tool requires  
13  
14 495 further standardization.(98) Finally, despite the limitations of peer-review, the role of expert  
15  
16 496 judgement should not be discounted.(41) Metrics are perhaps best applied as a complement or  
17  
18 497 check on the peer-review process, rather than the sole means of assessment of an individual's  
19  
20 498 research achievements.(142)



1  
2  
3 499 **Acknowledgements**

4  
5 500 None.

6  
7 501

8 502 **Competing Interests**

9  
10 503 The authors have declared that no competing interests exist.

11  
12 504

13 505 **Funding**

14  
15 506 The work on which this paper is based was funded by the Australian National Health and  
16  
17 507 Medical Research Council (NHMRC) for work related to an assessment of its peer review  
18  
19 508 processes being conducted by the Council. Staff of the Australian Institute of Health  
20  
21 509 Innovation undertook this systematic review for Council as part of that assessment. Other  
22  
23 510 than specifying what they would like to see from a literature review, NHMRC had no role in  
24  
25 511 the conduct of the systematic review, or the decision to publish.

26 512

27 513 **Data sharing statement**

28  
29 514 All data has been made available as Appendices.

30  
31 515

32 516 **Author Contributions**

33  
34 517 JB conceptualized and drafted the manuscript, revised it critically for important intellectual  
35  
36 518 content, and led the study. JH, KC and JCL made substantial contributions to the design,  
37  
38 519 analysis and revision of the work and critically reviewed the manuscript for important  
39  
40 520 intellectual content. CP, CB, MB, RC-W, FR, PS, AH, LAE, KL, EA, RS and EM carried out  
41  
42 521 the initial investigation, sourced and analyzed the data and revised the manuscript for  
43  
44 522 important intellectual content. PH and JIW critically commented on the manuscript,  
45  
46 523 contributed to the revision and editing of the final manuscript and reviewed the work for  
47  
48 524 important intellectual content. All authors approved the final manuscript as submitted and  
49  
50 525 agree to be accountable for all aspects of the work.



## 526 REFERENCES

- 527 1. Ibrahim N, Chaibi AH, Ben Ahmed M. New scientometric indicator for the  
528 qualitative evaluation of scientific production. *New Libr World*. 2015;116(11-12):661-  
529 76. doi:10.1108/nlw-01-2015-0002
- 530 2. Aixela FJ, Rovira-Esteva S. Publishing and impact criteria, and their bearing on  
531 translation studies: in search of comparability. *Perspectives-Studies in Translatology*.  
532 2015;23(2):265-83. doi:10.1080/0907676x.2014.972419
- 533 3. Belter CW. Bibliometric indicators: opportunities and limits. *J Med Libr Assoc*.  
534 2015;103(4):219-21. doi:10.3163/1536-5050.103.4.014
- 535 4. Frixione E, Ruiz-Zamarripa L, Hernandez G. Assessing individual intellectual output  
536 in scientific research: Mexico's national system for evaluating scholars performance  
537 in the humanities and the behavioral sciences. *PLOS One*. 2016;11(5): doi:  
538 10.1371/journal.pone.0155732. doi:10.1371/journal.pone.0155732
- 539 5. Marzolla M. Assessing evaluation procedures for individual researchers: the case of  
540 the Italian national scientific qualification. *J Informetr*. 2016;10(2):408-38.  
541 doi:10.1016/j.joi.2016.01.009
- 542 6. Marsh HW, Jayasinghe UW, Bond NW. Improving the peer-review process for grant  
543 applications-reliability, validity, bias, and generalizability. *Am Psychol*.  
544 2008;63(3):160-8. doi:10.1037/0003-066x.63.3.160
- 545 7. Kaatz A, Magua W, Zimmerman DR, et al. A quantitative linguistic analysis of  
546 national institutes of health R01 application critiques from investigators at one  
547 institution. *Acad Med*. 2015;90(1):69-75. doi:10.1097/acm.0000000000000442
- 548 8. Aoun SG, Bendok BR, Rahme RJ, et al. Standardizing the evaluation of scientific and  
549 academic performance in neurosurgery-critical review of the "h" index and its  
550 variants. *World Neurosurg*. 2013;80(5):E85-E90. doi:10.1016/j.wneu.2012.01.052
- 551 9. Hicks D, Wouters P, Waltman L, et al. Bibliometrics: the Leiden Manifesto for  
552 research metrics. *Nature*. 2015;520(7548):429-31. doi:10.1038/520429a
- 553 10. King J. A review of bibliometric and other science indicators and their role in  
554 research evaluation. *J Inf Sci*. 1987;13(5):261-76. doi:10.1177/016555158701300501
- 555 11. Abramo G, Cicero T, D'Angelo CA. A sensitivity analysis of researchers' productivity  
556 rankings to the time of citation observation. *J Informetr*. 2012;6(2):192-201.  
557 doi:10.1016/j.joi.2011.12.003
- 558 12. Arimoto A. Declining symptom of academic productivity in the Japanese research  
559 university sector. *High Educ*. 2015;70(2):155-72. doi:10.1007/s10734-014-9848-4
- 560 13. Carey RM. Quantifying scientific merit is it time to transform the impact factor? *Circ*  
561 *Res*. 2016;119(12):1273-5. doi:10.1161/circresaha.116.309883
- 562 14. Durieux V, Gevenois PA. Bibliometric indicators: quality measurements of scientific  
563 publication. *Radiology*. 2010;255(2):342-51. doi:10.1148/radiol.09090626
- 564 15. Selvarajoo K. Measuring merit: take the risk. *Science*. 2015;347(6218):139-40.
- 565 16. Wildgaard L, Schneider JW, Larsen B. A review of the characteristics of 108 author-  
566 level bibliometric indicators. *Scientometrics*. 2014;101(1):125-58.  
567 doi:10.1007/s11192-014-1423-3
- 568 17. Maximin S, Green D. The science and art of measuring the impact of an article.  
569 *Radiographics*. 2014;34(1):116-8. doi:10.1148/rg.341134008
- 570 18. Callaway E. Publishing elite turns against impact factor. *Nature*. 2016;535(7611):210-  
571 1.
- 572 19. Hirsch JE. An index to quantify an individual's scientific research output. *Proc Natl*  
573 *Acad Sci USA*. 2005;102(46):16569-72.

- 1  
2  
3 574 20. Bollen J, Crandall D, Junk D, et al. An efficient system to fund science: from proposal  
4 575 review to peer-to-peer distributions. *Scientometrics*. 2017;110(1):521-8.  
5 576 doi:10.1007/s11192-016-2110-3  
6 577 21. Finch A. Can we do better than existing author citation metrics? *Bioessays*.  
7 578 2010;32(9):744-7. doi:10.1002/bies.201000053  
8 579 22. EndNote. Clarivate Analytics; 2017.  
9 580 23. Schlosser RW. Appraising the quality of systematic reviews. *Focus: Technical Briefs*.  
10 581 2007;17:1-8.  
11 582 24. Braithwaite J, Herkes J, Ludlow K, et al. Association between organisational and  
12 583 workplace cultures, and patient outcomes: systematic review. *BMJ Open*.  
13 584 2017;7(11):e017708.  
14 585 25. Landis JR, Koch GG. The measurement of observer agreement for categorical data.  
15 586 *Biometrics*. 1977;33(1):159-74.  
16 587 26. Shamseer L, Moher D, Clarke M, et al. Preferred reporting items for systematic  
17 588 review and meta-analysis protocols (PRISMA-P) 2015: elaboration and explanation.  
18 589 *BMJ*. 2015;2(349):g7647.  
19 590 27. Hawker S, Payne S, Kerr C, et al. Appraising the evidence: reviewing disparate data  
20 591 systematically. *Qual Health Res*. 2002;12(9):1284-99.  
21 592 28. Thorngate W, Chowdhury W. By the numbers: track record, flawed reviews, journal  
22 593 space, and the fate of talented authors. In: Kaminski B, Koloch G, editors. *Advances*  
23 594 *in Social Simulation: Proceedings of the 9th Conference of the European Social*  
24 595 *Simulation Association. Advances in Intelligent Systems and Computing*. 229.  
25 596 Heidelberg, Germany: Springer Berlin; 2014. p. 177-88.  
26 597 29. Sood A, Therattil PJ, Chung S, et al. Impact of subspecialty fellowship training on  
27 598 research productivity among academic plastic surgery faculty in the United States.  
28 599 *Eplasty*. 2015;15:e50.  
29 600 30. Mutz R, Bornmann L, Daniel H-D. Testing for the fairness and predictive validity of  
30 601 research funding decisions: a multilevel multiple imputation for missing data  
31 602 approach using ex-ante and ex-post peer evaluation data from the Austrian science  
32 603 fund. *J Assoc Inf Sci Technol*. 2015;66(11):2321-39. doi:10.1002/asi.23315  
33 604 31. Rezek I, McDonald RJ, Kallmes DF. Pre-residency publication rate strongly predicts  
34 605 future academic radiology potential. *Acad Radiol*. 2012;19(5):632-4.  
35 606 doi:10.1016/j.acra.2011.11.017  
36 607 32. Knudson D. Kinesiology faculty citations across academic rank. *Quest*.  
37 608 2015;67(4):346-51. doi:10.1080/00336297.2015.1082144  
38 609 33. Wang D, Song C, Barabasi A-L. Quantifying long-term scientific impact. *Science*.  
39 610 2013;342(6154):127-32. doi:10.1126/science.1237825  
40 611 34. Efron N, Brennan NA. Citation analysis of Australia-trained optometrists. *Clin Exp*  
41 612 *Optom*. 2011;94(6):600-5. doi:10.1111/j.1444-0938.2011.00652.x  
42 613 35. Perlin MS, Santos AAP, Imasato T, et al. The Brazilian scientific output published in  
43 614 journals: a study based on a large CV database. *J Informetr*. 2017;11(1):18-31.  
44 615 doi:10.1016/j.joi.2016.10.008  
45 616 36. Stallings J, Vance E, Yang J, et al. Determining scientific impact using a  
46 617 collaboration index. *Proc Natl Acad Sci USA*. 2013;110(24):9680-5.  
47 618 doi:10.1073/pnas.1220184110  
48 619 37. Kreiman G, Maunsell JHR. Nine criteria for a measure of scientific output. *Front*  
49 620 *Comput Neurosci*. 2011;5(48): doi: 10.3389/fncom.2011.00048.  
50 621 doi:10.3389/fncom.2011.00048  
51 622 38. Mingers J. Measuring the research contribution of management academics using the  
52 623 Hirsch-index. *J Oper Res Soc*. 2009;60(9):1143-53. doi:10.1057/jors.2008.94

- 1  
2  
3 624 39. Halvorson MA, Finlay AK, Cronkite RC, et al. Ten-year publication trajectories of  
4 625 health services research career development award recipients: collaboration, awardee  
5 626 characteristics, and productivity correlates. *Eval Health Prof.* 2016;39(1):49-64.  
6 627 doi:10.1177/0163278714542848
- 7 628 40. Stroebe W. The graying of academia: will it reduce scientific productivity? *Am*  
8 629 *Psychol.* 2010;65(7):660-73. doi:10.1037/a0021086
- 9 630 41. Agarwal A, Durairajanayagam D, Tatagari S, et al. Bibliometrics: tracking research  
10 631 impact by selecting the appropriate metrics. *Asian J Androl.* 2016;18(2):296-309.  
11 632 doi:10.4103/1008-682x.171582
- 12 633 42. Jacob JH, Lehl S, Henkel AW. Early recognition of high quality researchers of the  
13 634 German psychiatry by worldwide accessible bibliometric indicators. *Scientometrics.*  
14 635 2007;73(2):117-30. doi:10.1007/s11192-006-1729-x
- 15 636 43. Minasny B, Hartemink AE, McBratney A, et al. Citations and the h-index of soil  
16 637 researchers and journals in the Web of Science, Scopus, and Google Scholar. *Peerj.*  
17 638 2013;1: doi: 10.7717/peerj.183. doi:10.7717/peerj.183
- 18 639 44. Gorraiz J, Gumpenberger C. Going beyond citations: SERUM - a new tool provided  
19 640 by a network of libraries. *Liber Quarterly.* 2010;20(1):80-93.
- 20 641 45. van Eck NJ, Waltman L, van Raan AFJ, et al. Citation analysis may severely  
21 642 underestimate the impact of clinical research as compared to basic research. *PLOS*  
22 643 *One.* 2013;8(4): doi: 10.1371/journal.pone.0062395.  
23 644 doi:10.1371/journal.pone.0062395
- 24 645 46. Meho LI, Rogers Y. Citation counting, citation ranking, and h-index of human-  
25 646 computer interaction researchers: a comparison of Scopus and Web of Science. *J*  
26 647 *Assoc Inf Sci Technol.* 2008;59(11):1711-26. doi:10.1002/asi.20874
- 27 648 47. Selek S, Saleh A. Use of h index and g index for American academic psychiatry.  
28 649 *Scientometrics.* 2014;99(2):541-8. doi:10.1007/s11192-013-1204-4
- 29 650 48. Kali A. Scientific impact and altmetrics. *Indian J Pharmacol.* 2015;47(5):570-1.  
30 651 doi:10.4103/0253-7613.165184
- 31 652 49. Neylon C, Wu S. Article-level metrics and the evolution of scientific impact. *PLOS*  
32 653 *Biol.* 2009;7(11): doi: 10.1371/journal.pbio.1000242.  
33 654 doi:10.1371/journal.pbio.1000242
- 34 655 50. Sahel J-A. Quality versus quantity: assessing individual research performance. *Sci*  
35 656 *Transl Med.* 2011;3(84): doi: 10.1126/scitranslmed.3002249.  
36 657 doi:10.1126/scitranslmed.3002249
- 37 658 51. Pinnock D, Whittingham K, Hodgson LJ. Reflecting on sharing scholarship,  
38 659 considering clinical impact and impact factor. *Nurse Educ Today.* 2012;32(7):744-6.  
39 660 doi:10.1016/j.nedt.2012.05.031
- 40 661 52. Eyre-Walker A, Stoletzki N. The assessment of science: the relative merits of post-  
41 662 publication review, the impact factor, and the number of citations. *PLOS Biol.*  
42 663 2013;11(10). doi:10.1371/journal.pbio.1001675
- 43 664 53. Ferrer-Sapena A, Sanchez-Perez EA, Peset F, et al. The Impact Factor as a measuring  
44 665 tool of the prestige of the journals in research assessment in mathematics. *Res Eval.*  
45 666 2016;25(3):306-14. doi:10.1093/reseval/rvv041
- 46 667 54. Moustafa K. Aberration of the citation. *Account Res.* 2016;23(4):230-44.
- 47 668 55. Abramo G, D'Angelo CA. Refrain from adopting the combination of citation and  
48 669 journal metrics to grade publications, as used in the Italian national research  
49 670 assessment exercise (VQR 2011-2014). *Scientometrics.* 2016;109(3):2053-65.  
50 671 doi:10.1007/s11192-016-2153-5
- 51 672 56. Páll-Gergely B. On the confusion of quality with impact: a note on Pyke's m-index.  
52 673 *BioScience.* 2015;65(2):117. doi:10.1093/biosci/biu207

- 1  
2  
3 674 57. Niederkrotenthaler T, Dorner TE, Maier M. Development of a practical tool to  
4 675 measure the impact of publications on the society based on focus group discussions  
5 676 with scientists. *BMC Public Health*. 2011;11(588): doi: 10.1186/471-2458-11-588.  
6 677 doi:10.1186/1471-2458-11-588
- 7 678 58. Kreines EM, Kreines MG. Control model for the alignment of the quality assessment  
8 679 of scientific documents based on the analysis of content-related context. *J Comput*  
9 680 *Syst Sci*. 2016;55(6):938-47. doi:10.1134/s1064230716050099
- 10 681 59. DiBartola SP, Hinchcliff KW. Metrics and the scientific literature: deciding what to  
11 682 read. *J Vet Intern Med*. 2017;31(3):629-32. doi:10.1111/jvim.14732
- 12 683 60. Szymanski BK, Lluís de la Rosa J, Krishnamoorthy M. An internet measure of the  
13 684 value of citations. *J Inf Sci*. 2012;185(1):18-31. doi:10.1016/j.ins.2011.08.005
- 14 685 61. Bloching PA, Heinzl H. Assessing the scientific relevance of a single publication over  
15 686 time. *S Afr J Sci*. 2013;109(9/10): doi: 10.1590/sajs.2013/20130063.
- 16 687 62. Benchimol Barbosa PR. Comments on paper by Thomas et al: how to evaluate  
17 688 "quality of publication". *Arq Bras Cardiol*. 2011;97(1):88-9.
- 18 689 63. Benchimol-Barbosa PR, Ribeiro RL, Barbosa EC. Further comments on the paper by  
19 690 Thomas et al: how to evaluate "quality of publication". *Arq Bras Cardiol*.  
20 691 2011;97(1):88.
- 21 692 64. Benchimol-Barbosa PR, Ribeiro RL, Barbosa EC. Additional comments on the paper  
22 693 by Thomas et al: how to evaluate "quality of publication". *Arq Bras Cardiol*.  
23 694 2011;97(1):88-9.
- 24 695 65. Slim K, Dupre A, Le Roy B. Impact factor: an assessment tool for journals or for  
25 696 scientists? *Anaesth Crit Care Pain Med*. 2017;36(6):347-8.  
26 697 doi:10.1016/j.accpm.2017.06.004
- 27 698 66. Diem A, Wolter SC. The use of bibliometrics to measure research performance in  
28 699 education sciences. *Res High Edu*. 2013;54(1):86-114. doi:10.1007/s11162-012-9264-  
29 700 5
- 30 701 67. Bornmann L, Leydesdorff L. Does quality and content matter for citedness? A  
31 702 comparison with para-textual factors and over time. *J Informetr*. 2015;9(3):419-29.  
32 703 doi:10.1016/j.joi.2015.03.001
- 33 704 68. Santangelo GM. Article-level assessment of influence and translation in biomedical  
34 705 research. *Mol Biol Cell*. 2017;28(11):1401-8. doi:10.1091/mbc.E16-01-0037
- 35 706 69. Ravenscroft J, Liakata M, Clare A, et al. Measuring scientific impact beyond  
36 707 academia: an assessment of existing impact metrics and proposed improvements.  
37 708 *PLOS One*. 2017;12(3). doi:10.1371/journal.pone.0173152
- 38 709 70. Trueger NS, Thoma B, Hsu CH, et al. The altmetric score: a new measure for article-  
39 710 level dissemination and impact. *Ann Emerg Med*. 2015;66(5):549-53.  
40 711 doi:10.1016/j.annemergmed.2015.04.022
- 41 712 71. Welk G, Fischman MG, Greenleaf C, et al. Editorial board position statement  
42 713 regarding the declaration on research assessment (DORA) - recommendations with  
43 714 respect to journal impact factors. *Res Q Exerc Sport*. 2014;85(4):429-30.  
44 715 doi:10.1080/02701367.2014.964104
- 45 716 72. Taylor DR, Michael LM, II, Klimo P, Jr. Not everything that matters can be measured  
46 717 and not everything that can be measured matters response. *J Neurosurg*.  
47 718 2015;123(3):544-5.
- 48 719 73. Christopher MM. Weighing the impact (factor) of publishing in veterinary journals. *J*  
49 720 *Vet Sci*. 2015;17(2):77-82. doi:10.1016/j.jvc.2015.01.002
- 50 721 74. Jokic M. H-index as a new scientometric indicator. *Biochemia Med*. 2009;19(1):5-9.
- 51 722 75. Bornmann L, Pudovkin AI. The journal impact factor should not be discarded. *J*  
52 723 *Korean Med Sci*. 2017;32(2):180-2.



- 1  
2  
3 724 76. Franceschini F, Galetto M, Maisano D, et al. The success-index: an alternative  
4 725 approach to the h-index for evaluating an individual's research output. *Scientometrics*.  
5 726 2012;92(3):621-41. doi:10.1007/s11192-011-0570-z  
6 727 77. Prathap G. Citation indices and dimensional homogeneity. *Curr Sci*. 2017;113(5):853-  
7 728 5.  
8 729 78. Saad G. Applying the h-index in exploring bibliometric properties of elite marketing  
9 730 scholars. *Scientometrics*. 2010;83(2):423-33. doi:10.1007/s11192-009-0069-z  
10 731 79. Duffy RD, Jadidian A, Webster GD, et al. The research productivity of academic  
11 732 psychologists: assessment, trends, and best practice recommendations. *Scientometrics*.  
12 733 2011;89(1):207-27. doi:10.1007/s11192-011-0452-4  
13 734 80. Prathap G. Evaluating journal performance metrics. *Scientometrics*. 2012;92(2):403-  
14 735 8. doi:10.1007/s11192-012-0746-1  
15 736 81. Lando T, Bertoli-Barsotti L. A new bibliometric index based on the shape of the  
16 737 citation distribution. *PLOS One*. 2014;9(12): doi: 10.1371/journal.pone.0115962.  
17 738 doi:10.1371/journal.pone.0115962  
18 739 82. Bornmann L, Wallon G, Ledin A. Is the h index related to (standard) bibliometric  
19 740 measures and to the assessments by peers? An investigation of the h index by using  
20 741 molecular life sciences data. *Res Eval*. 2008;17(2):149-56.  
21 742 doi:10.3152/095820208x319166  
22 743 83. Pepe A, Kurtz MJ. A measure of total research impact independent of time and  
23 744 discipline. *PLOS One*. 2012;7(11):e46428. doi:10.1371/journal.pone.0046428  
24 745 84. Haslam N, Laham S. Early-career scientific achievement and patterns of authorship:  
25 746 the mixed blessings of publication leadership and collaboration. *Res Eval*.  
26 747 2009;18(5):405-10. doi:10.3152/095820209x481075  
27 748 85. Ioannidis JPA, Klavans R, Boyack KW. Multiple citation indicators and their  
28 749 composite across scientific disciplines. *PLOS Biol*. 2016;14(7): doi:  
29 750 10.1371/journal.pbio.1002501. doi:10.1371/journal.pbio.1002501  
30 751 86. van Leeuwen T. Testing the validity of the Hirsch-index for research assessment  
31 752 purposes. *Res Eval*. 2008;17(2):157-60. doi:10.3152/095820208x319175  
32 753 87. Ouimet M, Bedard P-O, Gelineau F. Are the h-index and some of its alternatives  
33 754 discriminatory of epistemological beliefs and methodological preferences of faculty  
34 755 members? The case of social scientists in Quebec. *Scientometrics*. 2011;88(1):91-106.  
35 756 doi:10.1007/s11192-011-0364-3  
36 757 88. Kshetry VR, Benzel EC. Research productivity and fellowship training in  
37 758 neurosurgery. *World Neurosurg*. 2013;80(6):787-8. doi:10.1016/j.wneu.2013.10.005  
38 759 89. Biswal AK. An absolute index (Ab-index) to measure a researcher's useful  
39 760 contributions and productivity. *PLOS One*. 2013;8(12): doi:  
40 761 10.1371/journal.pone.0084334. doi:10.1371/journal.pone.0084334  
41 762 90. Tschudy MM, Rowe TL, Dover GJ, et al. Pediatric academic productivity: pediatric  
42 763 benchmarks for the h- and g-indices. *J Pediatr*. 2016;169:272-6.  
43 764 doi:10.1016/j.jpeds.2015.10.030  
44 765 91. Azer SA, Azer S. Bibliometric analysis of the top-cited gastroenterology and  
45 766 hepatology articles. *BMJ Open*. 2016;6(2): doi: 10.1136/bmjopen-2015-009889.  
46 767 doi:10.1136/bmjopen-2015-009889  
47 768 92. Joshi MA. Bibliometric indicators for evaluating the quality of scientific publications.  
48 769 *J Contemp Dent Pract*. 2014;15(2):258-62.  
49 770 93. Danielson J, McElroy S. Quantifying published scholarly works of experiential  
50 771 education directors. *Am J Pharm Edu*. 2013;77(8):167.  
51 772 94. Ion D, Andronic O, Bolocan A, et al. Tendencies on traditional metrics. *Chirurgia*  
52 773 (*Bucur*). 2017;112(2):117-23. doi:10.21614/chirurgia.112.2.117

- 1  
2  
3 774 95. Suiter AM, Moulaison HL. Supporting scholars: an analysis of academic library  
4 775 websites' documentation on metrics and impact. *J Acad Librariansh.* 2015;41(6):814-  
5 776 20. doi:10.1016/j.acalib.2015.09.004  
6 777 96. Butler JS, Kaye ID, Sebastian AS, et al. The evolution of current research impact  
7 778 metrics from bibliometrics to altmetrics? *Clin Spine Surg.* 2017;30(5):226-8.  
8 779 97. Krapivin M, Marchese M, Casati F. Exploring and understanding scientific metrics in  
9 780 citation networks. In: Zhou J, editor. *Complex Sciences, Pt 2. Lecture Notes of the*  
10 781 *Institute for Computer Sciences Social Informatics and Telecommunications*  
11 782 *Engineering.* 52009. p. 1550-63.  
12 783 98. Carpenter TA. Comparing digital apples to digital apples: background on niso's effort  
13 784 to build an infrastructure for new forms of scholarly assessment. *Inf Serv Use.*  
14 785 2014;34(1-2):103-6. doi:10.3233/isu-140739  
15 786 99. Gasparyan AY, Nurmashv B, Yessirkepov M, et al. The journal impact factor:  
16 787 moving toward an alternative and combined scientometric approach. *J Korean Med*  
17 788 *Sci* 2017;32(2):173-9. doi:10.3346/jkms.2017.32.2.173  
18 789 100. Moed HF, Halevi G. Multidimensional assessment of scholarly research impact. *J*  
19 790 *Assoc Inf Sci Technol.* 2015;66(10):1988-2002. doi:10.1002/asi.23314  
20 791 101. Chuang K-Y, Olaiya MT, Ho Y-S. Bibliometric analysis of the Polish Journal of  
21 792 Environmental Studies (2000-11). *Pol J Environ Stud.* 2012;21(5):1175-83.  
22 793 102. Vinyard M. Altmetrics: an overhyped fad or an important tool for evaluating scholarly  
23 794 output? *Computers in Libraries.* 2016;36(10):26-9.  
24 795 103. van Noorden R. A profusion of measures. *Nature.* 2010;465(7300):864-6.  
25 796 doi:10.1038/465864a  
26 797 104. van Noorden R. Love thy lab neighbour. *Nature.* 2010;468(7327):1011.  
27 798 doi:10.1038/4681011a  
28 799 105. Dinsmore A, Allen L, Dolby K. Alternative perspectives on impact: the potential of  
29 800 ALMs and altmetrics to inform funders about research impact. *PLOS Biol.*  
30 801 2014;12(11):e1002003. doi:10.1371/journal.pbio.1002003  
31 802 106. Cress PE. Using altmetrics and social media to supplement impact factor: maximizing  
32 803 your article's academic and societal impact. *Aesthet Surg J.* 2014;34(7):1123-6.  
33 804 doi:10.1177/1090820x14542973  
34 805 107. Moreira JAG, Zeng XHT, Amaral LAN. The distribution of the asymptotic number of  
35 806 citations to sets of publications by a researcher or from an academic department are  
36 807 consistent with a discrete lognormal model. *PLOS One.* 2015;10(11): doi:  
37 808 10.1371/journal.pone.0143108. doi:10.1371/journal.pone.0143108  
38 809 108. Waljee JF. Discussion: are quantitative measures of academic productivity correlated  
39 810 with academic rank in plastic surgery? A national study. *Plast Reconstr Surg.*  
40 811 2015;136(3):622-3. doi:10.1097/prs.0000000000001566  
41 812 109. Fazel S, Wolf A. What is the impact of a research publication? *Evid Based Ment*  
42 813 *Health.* 2017;20(2):33-4. doi:10.1136/eb-2017-102668  
43 814 110. Eysenbach G. Can tweets predict citations? Metrics of social impact based on Twitter  
44 815 and correlation with traditional metrics of scientific impact. *J Med Internet Res.*  
45 816 2011;13(4): doi: 10.2196/jmir.012. doi:10.2196/jmir.2012  
46 817 111. Hoffmann CP, Lutz C, Meckel M. Impact factor 2.0: applying social network analysis  
47 818 to scientific impact assessment. In: Sprague RH, editor. 2014 47th Hawaii  
48 819 International Conference on System Sciences. Proceedings of the Annual Hawaii  
49 820 International Conference on System Sciences 2014. p. 1576-85.  
50 821 112. Maggio LA, Meyer HS, Artino AR. Beyond citation rates: a real-time impact analysis  
51 822 of health professions education research using altmetrics. *Acad Med.*  
52 823 2017;92(10):1449-55. doi:10.1097/acm.0000000000001897

- 1  
2  
3 824 113. Raj A, Carr PL, Kaplan SE, et al. Longitudinal analysis of gender differences in  
4 825 academic productivity among medical faculty across 24 medical schools in the United  
5 826 States. *Acad Med*. 2016;91(8):1074-9. doi:10.1097/acm.0000000000001251  
6 827 114. Markel TA, Valsangkar NP, Bell TM, et al. Endangered academia: preserving the  
7 828 pediatric surgeon scientist. *J Pediatr Surg*. 2017;52(7):1079-83.  
8 829 doi:10.1016/j.jpedsurg.2016.12.006  
9 830 115. Mirnezami SR, Beaudry C, Lariviere V. What determines researchers' scientific  
10 831 impact? A case study of Quebec researchers. *Sci Public Policy*. 2016;43(2):262-74.  
11 832 doi:10.1093/scipol/scv038  
12 833 116. Napolitano LM. Scholarly activity requirements for critical care fellowship program  
13 834 directors: what should it be? How should we measure it? *Crit Care Med*.  
14 835 2016;44(12):2293-6. doi:10.1097/ccm.0000000000002120  
15 836 117. Bai X, Xia F, Lee I, et al. Identifying anomalous citations for objective evaluation of  
16 837 scholarly article impact. *PLOS One*. 2016;11(9): doi: 10.1371/journal.pone.0162364.  
17 838 doi:10.1371/journal.pone.0162364  
18 839 118. Gao C, Wang Z, Li X, et al. PR-Index: using the h-Index and PageRank for  
19 840 determining true impact. *PLOS One*. 2016;11(9): doi: 10.1371/journal.pone.0161755.  
20 841 doi:10.1371/journal.pone.0161755  
21 842 119. Assimakis N, Adam M. A new author's productivity index: p-index. *Scientometrics*.  
22 843 2010;85(2):415-27. doi:10.1007/s11192-010-0255-z  
23 844 120. Petersen AM, Succi S. The Z-index: a geometric representation of productivity and  
24 845 impact which accounts for information in the entire rank-citation profile. *J Informetr*.  
25 846 2013;7(4):823-32. doi:<https://doi.org/10.1016/j.joi.2013.07.003>  
26 847 121. Claro J, Costa CAV. A made-to-measure indicator for cross-disciplinary bibliometric  
27 848 ranking of researchers performance. *Scientometrics*. 2011;86(1):113-23.  
28 849 doi:10.1007/s11192-010-0241-5  
29 850 122. Sahoo BK, Singh R, Mishra B, et al. Research productivity in management schools of  
30 851 India during 1968-2015: a directional benefit-of-doubt model analysis. *Omega Int J*  
31 852 *Manage S*. 2017;66:118-39. doi:10.1016/j.omega.2016.02.004  
32 853 123. Aragon AM. A measure for the impact of research. *Sci Rep*. 2013;3: doi:  
33 854 10.1038/srep01649. doi:10.1038/srep01649  
34 855 124. Shibayama S, Baba Y. Impact-oriented science policies and scientific publication  
35 856 practices: the case of life sciences in Japan. *Res Policy*. 2015;44(4):936-50.  
36 857 doi:10.1016/j.respol.2015.01.012  
37 858 125. Tjldink JK, Schipper K, Bouter LM, et al. How do scientists perceive the current  
38 859 publication culture? A qualitative focus group interview study among Dutch  
39 860 biomedical researchers. *BMJ Open*. 2016;6(2): doi: 10.1136/bmjopen-2015-008681.  
40 861 doi:10.1136/bmjopen-2015-008681  
41 862 126. Crespo JA, Li Y, Ruiz-Castillo J. The measurement of the effect on citation inequality  
42 863 of differences in citation practices across scientific fields. *PLOS One*. 2013;8(3): doi:  
43 864 10.1371/journal.pone.0058727. doi:10.1371/journal.pone.0058727  
44 865 127. da Silva JAT. Does China need to rethink its metrics- and citation-based research  
45 866 rewards policies? *Scientometrics*. 2017;112(3):1853-7. doi:10.1007/s11192-017-  
46 867 2430-y  
47 868 128. Devos P. Research and bibliometrics: a long history. *Clin Res Hepatol Gastroenterol*.  
48 869 2011;35(5):336-7. doi:10.1016/j.clinre.2011.04.008  
49 870 129. Slyder JB, Stein BR, Sams BS, et al. Citation pattern and lifespan: a comparison of  
50 871 discipline, institution, and individual. *Scientometrics*. 2011;89(3):955-66.  
51 872 doi:10.1007/s11192-011-0467-x  
52  
53  
54  
55  
56  
57  
58  
59  
60

- 1  
2  
3 873 130. Zhou Y-B, Lu L, Li M. Quantifying the influence of scientists and their publications:  
4 874 distinguishing between prestige and popularity. *New J Phys*. 2012;14: doi:  
5 875 10.1088/367-2630/14/3/033033. doi:10.1088/367-2630/14/3/033033  
6 876 131. Sorensen AA, Weedon D. Productivity and impact of the top 100 cited Parkinson's  
7 877 disease investigators since 1985. *J Parkinsons Dis*. 2011;1(1):3-13. doi:10.3233/jpd-  
8 878 2011-10021  
9 879 132. Jeang K-T. H-index, mentoring-index, highly-cited and highly-accessed: how to  
10 880 evaluate scientists? *Retrovirology*. 2008;5(106). doi:10.1186/1742-4690-5-106  
11 881 133. Franceschini F, Maisano D. Publication and patent analysis of European researchers  
12 882 in the field of production technology and manufacturing systems. *Scientometrics*.  
13 883 2012;93(1):89-100. doi:10.1007/s11192-012-0648-2  
14 884 134. Sibbald SL, MacGregor JCD, Surmacz M, et al. Into the gray: a modified approach to  
15 885 citation analysis to better understand research impact. *J Med Libr Assoc*.  
16 886 2015;103(1):49-54. doi:10.3163/1536-5050.103.1.010  
17 887 135. Sutherland WJ, Goulson D, Potts SG, et al. Quantifying the impact and relevance of  
18 888 scientific research. *PLOS One*. 2011;6(11):e27537. doi:10.1371/journal.pone.0027537  
19 889 136. Nature Editorial Team. Announcement: Nature journals support the San Francisco  
20 890 Declaration on Research Assessment. *Nature*. 2017;544(7651):394.  
21 891 doi:10.1038/nature.2017.21882  
22 892 137. Pugh EN, Jr., Gordon SE. Embracing the principles of the San Francisco Declaration  
23 893 of Research Assessment: Robert Balaban's editorial. *J Gen Physiol*. 2013;142(3):175.  
24 894 doi:10.1085/jgp.201311077  
25 895 138. Zhang L, Rousseau R, Sivertsen G. Science deserves to be judged by its contents, not  
26 896 by its wrapping: revisiting Seglen's work on journal impact and research evaluation.  
27 897 *PLOS One*. 2017;12(3): doi: 10.1371/journal.pone.0174205.  
28 898 doi:10.1371/journal.pone.0174205  
29 899 139. San Francisco Declaration on Research Assessment (DORA). DORA—ASCB San  
30 900 Francisco, US2016 [Available from: <http://www.ascb.org/dora/>.  
31 901 140. Cabezas-Clavijo A, Delgado-Lopez-Cozar E. Google Scholar and the h-index in  
32 902 biomedicine: the popularization of bibliometric assessment. *Med Intensiva*.  
33 903 2013;37(5):343-54. doi:10.1016/j.medin.2013.01.008  
34 904 141. Iyengar R, Wang Y, Chow J, et al. An integrated approach to evaluate faculty  
35 905 members' research performance. *Acad Med*. 2009;84(11):1610-6.  
36 906 doi:10.1097/ACM.0b013e3181bb2364  
37 907 142. Jacso P. Eigenfactor and article influence scores in the journal citation reports. *Online*  
38 908 *Inform Rev*. 2010;34(2):339-48. doi:10.1108/14684521011037034  
39 909  
40  
41  
42  
43  
44  
45  
46 910  
47  
48  
49  
50  
51  
52  
53  
54  
55  
56  
57  
58  
59  
60





18 **\*Reasons for exclusion are noted below**

19  
20  
21  
22  
23  
24  
25  
26  
27

| Reason for exclusion at the full text level             | Number of articles excluded |
|---------------------------------------------------------|-----------------------------|
| Not in English language                                 | 47                          |
| Full text not available                                 | 62                          |
| Does not discuss assessment of an individual researcher | 268                         |
| <b>Total</b>                                            | <b>377</b>                  |

28 Data screening and extraction process for academic articles

29  
30 279x188mm (300 x 300 DPI)

1  
2  
3  
4  
5  
6  
7  
8  
9  
10  
11  
12  
13  
14  
15  
16  
17  
18  
19  
20  
21  
22  
23  
24  
25  
26  
27  
28  
29  
30  
31  
32  
33  
34  
35  
36  
37  
38  
39  
40  
41  
42  
43  
44  
45  
46  
47  
48  
49  
50  
51  
52  
53  
54  
55  
56  
57  
58  
59  
60



Percentages of positive and negative discussion regarding selected commonly used metrics for assessing individual researchers (n=478 articles)

279x191mm (300 x 300 DPI)



The Comprehensive Researcher Achievement Model (CRAM)

279x148mm (300 x 300 DPI)

Appendix 1: Full Search Strategy

|                                                                 |                                                                                                                                                                                                                                                                                                                                                                                                                                                                                    |                     |
|-----------------------------------------------------------------|------------------------------------------------------------------------------------------------------------------------------------------------------------------------------------------------------------------------------------------------------------------------------------------------------------------------------------------------------------------------------------------------------------------------------------------------------------------------------------|---------------------|
| <b>Name of database</b>                                         | Web of Science Core Collection, BIOSIS Citation Index, Medline                                                                                                                                                                                                                                                                                                                                                                                                                     |                     |
| <b>Platform</b>                                                 | Web of Science [Clarivate Analytics]                                                                                                                                                                                                                                                                                                                                                                                                                                               |                     |
| <b>Database coverage</b>                                        | 2007-2017                                                                                                                                                                                                                                                                                                                                                                                                                                                                          |                     |
| <b>Date exported to Reference Management Software (EndNote)</b> | 19 <sup>th</sup> October 2017                                                                                                                                                                                                                                                                                                                                                                                                                                                      |                     |
| <b>Search strategy</b>                                          | Model OR framework OR assess* OR evaluat*OR<br>*metric*OR measur* OR criteri*OR citation*OR<br>unconscious bias OR rank*                                                                                                                                                                                                                                                                                                                                                           | Results: 13,282,151 |
|                                                                 | AND                                                                                                                                                                                                                                                                                                                                                                                                                                                                                |                     |
|                                                                 | researcher excellence OR track record OR researcher<br>funding OR researcher perform* OR relative to opportunity<br>OR researcher potential OR research* career pathway OR<br>academic career pathway OR funding system OR funding<br>body OR researcher impact OR scientific* productivity OR<br>academic productivity OR top researcher OR researcher<br>ranking OR grant application OR researcher output OR<br>h*index OR i*index OR impact factor OR individual<br>researcher | Results: 11,616     |
|                                                                 | Combined sets [Auto select language based on search<br>language]                                                                                                                                                                                                                                                                                                                                                                                                                   | Results: 7,530      |

only

1  
2  
3  
4  
5  
6  
7  
8  
9  
10  
11  
12  
13  
14  
15  
16  
17  
18  
19  
20  
21  
22  
23  
24  
25  
26  
27  
28  
29  
30  
31  
32  
33  
34  
35  
36  
37  
38  
39  
40  
41  
42  
43  
44  
45  
46

## Appendix 2: Summary table of included articles and the metrics or models they discuss

| Publication Details |      |                                             |         | Metric or Model Assessing an Individual's Research Achievement |               |         |     |       |             |     |
|---------------------|------|---------------------------------------------|---------|----------------------------------------------------------------|---------------|---------|-----|-------|-------------|-----|
| First author        | Year | Journal name                                | Format^ | Peer-review                                                    | Simple Counts | h-index | JIF | Other | Alt-metrics | New |
| Abramo              | 2016 | Scientometrics                              | ED      |                                                                |               |         |     | Y     |             |     |
| Agarwal             | 2016 | Asian Journal of Andrology                  | ED      |                                                                | Y             | Y       | Y   | Y     | Y           |     |
| Ahmad               | 2013 | Anesthesia and Analgesia                    | EM      |                                                                | Y             |         |     |       |             |     |
| Aixela              | 2015 | Perspectives: Studies in Translatology      | ED      | Y                                                              |               | Y       | Y   | Y     |             |     |
| Akl                 | 2012 | Canadian Medical Association Journal        | EM      | Y                                                              |               |         |     |       |             |     |
| Albion              | 2012 | Australian Educational Researcher           | EM      |                                                                |               | Y       | Y   | Y     |             |     |
| Alguliyev           | 2016 | Journal of Scientometric Research           | EM      |                                                                |               |         | Y   | Y     |             |     |
| Allen               | 2010 | ScienceAsia                                 | ED      |                                                                |               | Y       | Y   |       |             |     |
| Anderson            | 2008 | Scientometrics                              | ED      |                                                                |               | Y       |     |       |             | Y   |
| Anderson            | 2017 | Applied Economics                           | EM      | Y                                                              |               | Y       | Y   |       |             |     |
| Anfossi             | 2015 | International Journal of Dermatology        | EM      |                                                                |               |         | Y   |       |             |     |
| Antunes             | 2015 | Revista do Colegio Brasileiro de Cirurgioes | EM      | Y                                                              |               | Y       |     |       |             |     |
| Aoun                | 2013 | World Neurosurgery                          | RE      | Y                                                              |               | Y       | Y   |       |             |     |
| Aragon              | 2013 | Nature Scientific Reports                   | EM      |                                                                |               |         |     |       |             | Y   |
| Armado              | 2017 | Transinformação                             | EM      |                                                                |               | Y       |     | Y     |             |     |
| Assimakis           | 2010 | Scientometrics                              | EM      |                                                                |               |         |     |       |             | Y   |
| Azer                | 2016 | Education Forum                             |         |                                                                |               | Y       | Y   | Y     |             |     |
| Babineau            | 2014 | The Western Journal of Emergency Medicine   | EM      |                                                                |               | Y       |     |       |             |     |

1  
2  
3  
4  
5  
6  
7  
8  
9  
10  
11  
12  
13  
14  
15  
16  
17  
18  
19  
20  
21  
22  
23  
24  
25  
26  
27  
28  
29  
30  
31  
32  
33  
34  
35  
36  
37  
38  
39  
40  
41  
42  
43  
44  
45  
46

|                   |      |                                                   |    |   |   |   |   |   |   |
|-------------------|------|---------------------------------------------------|----|---|---|---|---|---|---|
| Baccini           | 2014 | Scientometrics                                    | EM |   |   | Y | Y | Y |   |
| Badar             | 2016 | Aslib Journal of Information Management           | EM | Y |   |   | Y |   |   |
| Bai               | 2016 | PLOS One                                          | EM |   | Y | Y | Y | Y | Y |
| Bala              | 2013 | Journal of Clinical Epidemiology                  | EM |   |   |   | Y |   |   |
| Balaban           | 2013 | Journal of General Physiology                     | ED | Y |   |   |   |   |   |
| Balandin          | 2009 | Augmentative and Alternative Communication        | ED |   |   | Y | Y |   |   |
| Barczynski        | 2009 | Journal of Human Kinetics                         | ED |   |   |   | Y | Y |   |
| Bastian           | 2017 | Journal of Bone and Joint Surgery-American Volume | EM |   |   | Y |   |   |   |
| Baum              | 2011 | SAGE                                              | EM | Y |   |   | Y |   |   |
| Beck              | 2017 | Research Evaluation                               | EM | Y |   |   |   |   |   |
| Beirlant          | 2010 | Scandinavian Journal of Statistics                | EM |   |   | Y |   |   |   |
| Belikov           | 2015 | f1000 Research                                    | EM |   |   |   | Y |   | Y |
| Bellini           | 2012 | The Lancet                                        | ED |   | Y | Y | Y |   |   |
| Belter            | 2015 | Journal of The Medical Library Association        | ED | Y |   | Y |   |   |   |
| Benchimol-Barbosa | 2011 | Arquivos Brasileiros de Cardiologia               | ED |   |   |   |   | Y |   |
| Benway            | 2009 | Urology                                           | ED | Y | Y | Y |   |   |   |
| Bertuzzi          | 2013 | Molecular Biology of the Cell                     | ED |   |   |   |   | Y |   |
| Bharathi          | 2013 | PLOS One                                          | ED |   |   |   | Y |   |   |
| Bini              | 2008 | Electronic Transactions on Numerical Analysis     | EM |   |   |   |   |   | Y |
| Birks             | 2014 | Health Services Research & Policy                 | EM | Y |   | Y |   |   |   |
| Biswal            | 2013 | PLOS One                                          | ED |   |   |   | Y |   | Y |
| Bloch             | 2016 | Research Evaluation                               | EM |   |   |   |   |   | Y |

|    |                 |      |                                          |    |   |   |   |   |   |   |
|----|-----------------|------|------------------------------------------|----|---|---|---|---|---|---|
| 1  |                 |      |                                          |    |   |   |   |   |   |   |
| 2  |                 |      |                                          |    |   |   |   |   |   |   |
| 3  | Bloching        | 2013 | South African Journal of Science         | EM | Y |   |   |   |   | Y |
| 4  |                 |      |                                          |    |   |   |   |   |   |   |
| 5  | Bollen          | 2016 | Scientometrics                           | ED | Y |   |   |   |   | Y |
| 6  |                 |      |                                          |    |   |   |   |   |   |   |
| 7  | Bolli           | 2014 | Circulation Research                     | ED |   |   |   |   |   |   |
| 8  |                 |      |                                          |    |   |   |   |   |   |   |
| 9  | Bornmann        | 2009 | EMBO Reports                             | ED |   |   |   | Y | Y |   |
| 10 |                 |      |                                          |    |   |   |   |   |   |   |
| 11 | Bornmann        | 2015 | Journal of Informetrics                  | EM | Y | Y | Y | Y | Y |   |
| 12 |                 |      |                                          |    |   |   |   |   |   |   |
| 13 | Bornmann        | 2016 | EMBO Reports                             | ED |   |   | Y | Y | Y |   |
| 14 |                 |      |                                          |    |   |   |   |   |   |   |
| 15 | Bornmann        | 2014 | Scientometrics                           | EM |   |   | Y | Y |   |   |
| 16 |                 |      |                                          |    |   |   |   |   |   |   |
| 17 | Bornmann        | 2008 | Research Evaluation                      | EM | Y | Y | Y | Y | Y | Y |
| 18 |                 |      |                                          |    |   |   |   |   |   |   |
| 19 | Bornmann        | 2017 | Journal of Informetrics                  | EM |   |   | Y | Y | Y | Y |
| 20 |                 |      |                                          |    |   |   |   |   |   |   |
| 21 | Bornmann        | 2017 | Journal of Korean Medical Science        | ED |   |   |   |   | Y | Y |
| 22 |                 |      |                                          |    |   |   |   |   |   |   |
| 23 | Bould           | 2011 | British Journal of Anaesthesia           | EM |   |   |   | Y |   |   |
| 24 |                 |      |                                          |    |   |   |   |   |   |   |
| 25 | Bradshaw        | 2016 | PLOS One                                 | EM |   |   | Y | Y | Y | Y |
| 26 |                 |      |                                          |    |   |   |   |   |   |   |
| 27 | Brown           | 2011 | American Journal of Occupational Therapy | ED |   |   |   | Y | Y | Y |
| 28 |                 |      |                                          |    |   |   |   |   |   |   |
| 29 | Buela-Casal     | 2012 | Scientometrics                           | EM |   |   |   |   | Y |   |
| 30 |                 |      |                                          |    |   |   |   |   |   |   |
| 31 | Buela-Casal     | 2010 | Revista de Psicodidáctica                | ED |   |   | Y | Y | Y | Y |
| 32 |                 |      |                                          |    |   |   |   |   |   |   |
| 33 | Butler          | 2017 | Clinical Spine Surgery                   | ED |   |   |   |   |   | Y |
| 34 |                 |      |                                          |    |   |   |   |   |   |   |
| 35 | Cabazas Clavijo | 2013 | Medicina Intensiva (English edition)     | RE |   |   | Y | Y | Y |   |
| 36 |                 |      |                                          |    |   |   |   |   |   |   |
| 37 | Cagan           | 2013 | Disease Models & Mechanisms              | ED |   |   |   |   | Y |   |
| 38 |                 |      |                                          |    |   |   |   |   |   |   |
| 39 | Callaway        | 2016 | Nature                                   | ED |   |   |   |   | Y |   |
| 40 |                 |      |                                          |    |   |   |   |   |   |   |
| 41 | Calver          | 2013 | Grumpy Scientists                        | ED |   |   | Y | Y | Y | Y |
| 42 |                 |      |                                          |    |   |   |   |   |   |   |
| 43 | Calver          | 2015 | Australian Universities Review           | ED |   |   |   |   |   | Y |
| 44 |                 |      |                                          |    |   |   |   |   |   |   |
| 45 | Caminiti        | 2015 | BMC Health Services Research             | RE |   |   |   |   |   | Y |
| 46 |                 |      |                                          |    |   |   |   |   |   |   |

|    |                     |      |                                                                        |    |   |   |   |   |   |
|----|---------------------|------|------------------------------------------------------------------------|----|---|---|---|---|---|
| 1  |                     |      |                                                                        |    |   |   |   |   |   |
| 2  |                     |      |                                                                        |    |   |   |   |   |   |
| 3  | Cantin              | 2015 | International Journal of Morphology                                    | EM |   |   | Y |   |   |
| 4  |                     |      |                                                                        |    |   |   |   |   |   |
| 5  | Carpenter           | 2014 | Academic Emergency Medicine                                            | ED |   |   | Y | Y | Y |
| 6  |                     |      |                                                                        |    |   |   |   |   |   |
| 7  | Carpenter           | 2014 | Information Service and Use                                            | ED |   |   |   | Y | Y |
| 8  |                     |      |                                                                        |    |   |   |   |   |   |
| 9  | Castelnuovo         | 2010 | Clinical Practice & Epidemiology in Mental Health                      | RE |   |   | Y | Y | Y |
| 10 |                     |      |                                                                        |    |   |   |   |   |   |
| 11 | Castillo            | 2010 | American Journal of Neuroradiology                                     | ED |   |   | Y |   | Y |
| 12 |                     |      |                                                                        |    |   |   |   |   |   |
| 13 | Chiari              | 2016 | Nurse Education Today                                                  | EM | Y |   |   |   |   |
| 14 |                     |      |                                                                        |    |   |   |   |   |   |
| 15 | Choi                | 2014 | Journal of Radiation Oncology                                          | EM | Y |   | Y |   | Y |
| 16 |                     |      |                                                                        |    |   |   |   |   |   |
| 17 | Choi                | 2009 | International Journal of Radiation Oncology, Biology, Physics          | EM |   | Y | Y |   |   |
| 18 |                     |      |                                                                        |    |   |   |   |   |   |
| 19 | Chopra              | 2016 | Aesthetic Surgery Journal                                              | EM |   |   | Y |   |   |
| 20 |                     |      |                                                                        |    |   |   |   |   |   |
| 21 | Choudhri            | 2015 | Radiographics                                                          | ED |   | Y | Y | Y |   |
| 22 |                     |      |                                                                        |    |   |   |   |   |   |
| 23 | Chowdhury           | 2015 | PLOS One                                                               | EM | Y |   | Y |   |   |
| 24 |                     |      |                                                                        |    |   |   |   |   |   |
| 25 | Christopher         | 2015 | Journal of Veterinary Cardiology                                       | ED |   |   |   | Y |   |
| 26 |                     |      |                                                                        |    |   |   |   |   |   |
| 27 | Chung               | 2012 | Scientometrics                                                         | EM |   |   |   |   | Y |
| 28 |                     |      |                                                                        |    |   |   |   |   |   |
| 29 | Ciriminna           | 2013 | Chemistry Central Journal                                              | ED |   | Y | Y | Y | Y |
| 30 |                     |      |                                                                        |    |   |   |   |   |   |
| 31 | Claro               | 2011 | Scientometrics                                                         | EM |   |   |   |   |   |
| 32 |                     |      |                                                                        |    |   |   |   |   |   |
| 33 | Cleary              | 2010 | International Journal of Mental Health Nursing                         | ED |   |   | Y |   |   |
| 34 |                     |      |                                                                        |    |   |   |   |   |   |
| 35 | Cone                | 2013 | Academic Emergency Medicine                                            | ED |   |   | Y |   |   |
| 36 |                     |      |                                                                        |    |   |   |   |   |   |
| 37 | Cone                | 2012 | Academic Emergency Medicine                                            | ED |   |   |   | Y |   |
| 38 |                     |      |                                                                        |    |   |   |   |   |   |
| 39 | Cordero-Villafafila | 2015 | Revista de Psiquiatría y Salud Mental (English Edition)                | ED |   |   | Y | Y | Y |
| 40 |                     |      |                                                                        |    |   |   |   |   |   |
| 41 | Costas              | 2011 | Scientometrics                                                         | EM |   | Y |   |   | Y |
| 42 |                     |      |                                                                        |    |   |   |   |   |   |
| 43 | Costas              | 2009 | Journal of the American Society for Information Science and Technology | EM |   | Y |   | Y |   |
| 44 |                     |      |                                                                        |    |   |   |   |   |   |
| 45 |                     |      |                                                                        |    |   |   |   |   |   |
| 46 |                     |      |                                                                        |    |   |   |   |   |   |



|    |                                   |      |                                                                           |    |   |   |   |   |   |
|----|-----------------------------------|------|---------------------------------------------------------------------------|----|---|---|---|---|---|
| 1  |                                   |      |                                                                           |    |   |   |   |   |   |
| 2  |                                   |      |                                                                           |    |   |   |   |   |   |
| 3  | Crespo                            | 2013 | PLOS One                                                                  | EM |   | Y | Y |   | Y |
| 4  |                                   |      |                                                                           |    |   |   |   |   |   |
| 5  | Cress                             | 2014 | Aesthetic Surgery Journal                                                 | ED |   |   |   | Y | Y |
| 6  |                                   |      |                                                                           |    |   |   |   |   |   |
| 7  | Crotty                            |      | European Heart Journal                                                    | ED |   |   | Y |   |   |
| 8  | Culley                            | 2014 | Anesthesia & Analgesia                                                    | EM |   | Y | Y | Y |   |
| 9  |                                   |      |                                                                           |    |   |   |   |   |   |
| 10 | Cynical Geographers<br>Collective | 2011 | Antipode                                                                  | ED |   | Y |   | Y |   |
| 11 |                                   |      |                                                                           |    |   |   |   |   |   |
| 12 | Czarnecki                         | 2013 | Bulletin of the Polish Academy of Sciences                                | EM |   |   | Y |   |   |
| 13 |                                   |      |                                                                           |    |   |   |   |   |   |
| 14 | da Silva                          | 2017 | Scientometrics                                                            | ED |   |   |   | Y | Y |
| 15 |                                   |      |                                                                           |    |   |   |   |   | Y |
| 16 | Danell                            | 2011 | Journal of the American Society for Information Science and<br>Technology | EM |   | Y |   |   |   |
| 17 |                                   |      |                                                                           |    |   |   |   |   |   |
| 18 | Danielson                         | 2013 | American Journal of Pharmaceutical Education                              | EM |   | Y | Y | Y |   |
| 19 |                                   |      |                                                                           |    |   |   |   |   |   |
| 20 | de Granda-Orive                   | 2014 | Archivos de Bronconeumología                                              | ED |   | Y |   | Y |   |
| 21 |                                   |      |                                                                           |    |   |   |   |   |   |
| 22 | De Gregori                        | 2016 | Journal of Pain Research                                                  | EM |   |   |   |   | Y |
| 23 |                                   |      |                                                                           |    |   |   |   |   |   |
| 24 | De la Flor-Martínez M             | 2017 | Medicina Oral Patología Oral Y Cirugía Bucal                              | EM | Y |   | Y |   |   |
| 25 |                                   |      |                                                                           |    |   |   |   |   |   |
| 26 | De Marchi                         | 2016 | Scientometrics                                                            | EM |   |   |   | Y |   |
| 27 |                                   |      |                                                                           |    |   |   |   |   |   |
| 28 | De Witte                          | 2010 | Scientometrics                                                            | EM | Y |   |   |   | Y |
| 29 |                                   |      |                                                                           |    |   |   |   |   |   |
| 30 | Delgadillo                        | 2016 | Family & Consumer Sciences research journal                               | RE |   |   | Y |   | Y |
| 31 |                                   |      |                                                                           |    |   |   |   |   |   |
| 32 | DeLuca                            | 2013 | Academic Emergency Medicine                                               | EM | Y |   | Y |   |   |
| 33 |                                   |      |                                                                           |    |   |   |   |   |   |
| 34 | Devos                             | 2011 | Clinics and Research in Hepatology and Gastroenterology                   | ED |   |   | Y |   |   |
| 35 |                                   |      |                                                                           |    |   |   |   |   |   |
| 36 | Diamandis                         | 2017 | BMC Medicine                                                              | ED |   |   |   | Y |   |
| 37 |                                   |      |                                                                           |    |   |   |   |   |   |
| 38 | DiBartola                         | 2017 | Journal of Veterinary Internal Medicine                                   | ED |   |   | Y | Y | Y |
| 39 |                                   |      |                                                                           |    |   |   |   |   |   |
| 40 | Diem                              | 2013 | Research in Higher Education                                              | EM |   |   | Y |   |   |
| 41 |                                   |      |                                                                           |    |   |   |   |   |   |
| 42 | Ding                              | 2011 | Information Processing and Management                                     | EM |   | Y | Y | Y | Y |
| 43 |                                   |      |                                                                           |    |   |   |   |   |   |
| 44 |                                   |      |                                                                           |    |   |   |   |   |   |
| 45 |                                   |      |                                                                           |    |   |   |   |   |   |
| 46 |                                   |      |                                                                           |    |   |   |   |   |   |

|    |             |      |                                                             |    |   |   |   |   |   |
|----|-------------|------|-------------------------------------------------------------|----|---|---|---|---|---|
| 1  |             |      |                                                             |    |   |   |   |   |   |
| 2  |             |      |                                                             |    |   |   |   |   |   |
| 3  |             |      | Journal of the American Society for Information Science and |    |   |   |   |   |   |
| 4  | Ding        | 2011 | Technology                                                  | EM |   | Y | Y |   | Y |
| 5  |             |      |                                                             |    |   |   |   |   |   |
| 6  | Diniz-Filho | 2016 | Journal of Informetrics                                     | EM | Y | Y |   | Y |   |
| 7  |             |      |                                                             |    |   |   |   |   |   |
| 8  | Dinsmore    | 2014 | PLOS Biology                                                | ED |   |   |   |   | Y |
| 9  |             |      |                                                             |    |   |   |   |   |   |
| 10 | Dodson      | 2012 | Biochemical and Biophysical Research Communications         | EM | Y |   | Y | Y | Y |
| 11 |             |      |                                                             |    |   |   |   |   |   |
| 12 | Donato      | 2014 | Revista Portuguesa De Pneumologia                           | ED |   |   |   | Y |   |
| 13 |             |      |                                                             |    |   |   |   |   |   |
| 14 | Doyle       | 2015 | Molecular Psychiatry                                        | EM | Y |   |   |   |   |
| 15 |             |      |                                                             |    |   |   |   |   |   |
| 16 | Duffy       | 2011 | Scientometrics                                              | EM |   | Y | Y |   | Y |
| 17 |             |      |                                                             |    |   |   |   |   |   |
| 18 | Duffy       | 2008 | Journal of Counseling Psychology                            | EM |   | Y | Y |   | Y |
| 19 |             |      |                                                             |    |   |   |   |   |   |
| 20 | Durieux     | 2010 | Radiology                                                   | RE |   |   | Y | Y | Y |
| 21 |             |      |                                                             |    |   |   |   |   |   |
| 22 | Ebadi       | 2016 | Scientometrics                                              | EM |   |   |   |   | Y |
| 23 |             |      |                                                             |    |   |   |   |   | Y |
| 24 | Eblen       | 2016 | PLOS One                                                    | EM | Y |   |   |   |   |
| 25 |             |      |                                                             |    |   |   |   |   |   |
| 26 | Efron       | 2011 | Clinical and Experimental Optometry                         | EM |   | Y | Y |   | Y |
| 27 |             |      |                                                             |    |   |   |   |   |   |
| 28 | Ekpo        | 2016 | Journal of Medical Imaging and Radiation Sciences           | EM |   |   | Y | Y | Y |
| 29 |             |      |                                                             |    |   |   |   |   | Y |
| 30 | El Emam     | 2012 | Journal of Medical Internet Research                        | EM |   | Y | Y | Y |   |
| 31 |             |      |                                                             |    |   |   |   |   |   |
| 32 | Ellson      | 2009 | Journal of Business Research                                | ED |   |   |   |   |   |
| 33 |             |      |                                                             |    |   |   |   |   |   |
| 34 | Eloy        | 2014 | Otolaryngology–Head and Neck Surgery                        | EM | Y |   | Y | Y | Y |
| 35 |             |      |                                                             |    |   |   |   |   |   |
| 36 | Eloy        | 2013 | Laryngoscope                                                | EM |   |   | Y |   |   |
| 37 |             |      |                                                             |    |   |   |   |   |   |
| 38 | Esposito    | 2010 | European Journal of Oral Implantology.                      | ED |   |   |   | Y |   |
| 39 |             |      |                                                             |    |   |   |   |   |   |
| 40 | Eyre-Walker | 2013 | PLOS Biology                                                | EM | Y | Y |   | Y |   |
| 41 |             |      |                                                             |    |   |   |   |   |   |
| 42 | Eysenbach   | 2011 | Journal of Medical Internet Research                        | EM |   | Y | Y | Y | Y |
| 43 |             |      |                                                             |    |   |   |   |   |   |
| 44 | Fabry       | 2017 | GMS Journal for Medical Education                           | ED | Y |   |   | Y | Y |
| 45 |             |      |                                                             |    |   |   |   |   |   |
| 46 |             |      |                                                             |    |   |   |   |   |   |

|               |      |                                                                          |    |   |   |   |   |   |   |
|---------------|------|--------------------------------------------------------------------------|----|---|---|---|---|---|---|
| Fang          | 2016 | eLIFE                                                                    | EM | Y |   |   |   |   |   |
| Fazel         | 2017 | Evidence-based Mental Health                                             | EM | Y |   |   | Y | Y |   |
| Fedderke      | 2015 | Research Policy                                                          | EM |   | Y | Y |   |   |   |
| Feethman      | 2015 | Veterinary Record                                                        | ED |   |   |   | Y |   |   |
| Ferrer-Sapena | 2016 | Research Evaluation                                                      | ED |   | Y |   | Y | Y | Y |
| Filler        | 2014 | Academic Medicine                                                        | EM |   |   |   | Y |   |   |
| Finch         | 2010 | Bioessays                                                                | ED |   |   | Y | Y | Y |   |
| Flaatten      | 2016 | Acta Anaesthesiologica Scandinavica                                      | ED |   |   | Y | Y |   |   |
| Franceschet   | 2010 | Journal of Informetrics                                                  | EM |   |   |   | Y | Y |   |
| Franceschini  | 2012 | Scientometrics                                                           | EM |   |   |   |   | Y | Y |
| Franceschini  | 2012 | Scientometrics                                                           | EM |   |   | Y | Y | Y | Y |
| Franceschini  | 2012 | Scientometrics                                                           | EM |   | Y | Y |   | Y |   |
| Frittelli     | 2016 | Journal of the Association for Information Science and Technology        | EM |   |   | Y | Y |   | Y |
| Frixione      | 2016 | PLOS One                                                                 | EM | Y |   |   |   |   | Y |
| Fujita        | 2017 | IEEE 41st Annual Computer Software and Applications Conference (COMPSAC) | EM | Y | Y |   |   |   |   |
| Gambadauro    | 2007 | European Journal of Obstetrics & Gynecology and Reproductive Biology     | ED |   |   |   | Y |   |   |
| Gao           | 2016 | PLOS One                                                                 | ED |   |   | Y |   |   | Y |
| Garcia-Perez  | 2015 | Scientometrics                                                           | EM |   | Y |   |   | Y |   |
| Garcia-Perez  | 2009 | Spanish Journal of Psychology                                            | EM |   | Y | Y |   |   |   |
| Garner        | 2017 | Journal of Neurointerventional Surgery                                   | RE |   | Y | Y |   |   |   |

|    |                    |      |                                                       |    |   |   |   |   |   |
|----|--------------------|------|-------------------------------------------------------|----|---|---|---|---|---|
| 1  |                    |      |                                                       |    |   |   |   |   |   |
| 2  |                    |      |                                                       |    |   |   |   |   |   |
| 3  | Gasparyan          | 2017 | Journal of Korean Medical Science                     | ED |   |   | Y | Y | Y |
| 4  |                    |      |                                                       |    |   |   |   |   |   |
| 5  | Gast               | 2014 | Plastic and Reconstructive Surgery                    | EM |   | Y | Y |   |   |
| 6  |                    |      |                                                       |    |   |   |   |   |   |
| 7  | Gast               | 2014 | Plastic & Reconstructive Surgery                      | EM |   |   | Y |   | Y |
| 8  |                    |      |                                                       |    |   |   |   |   |   |
| 9  | Gaughan            | 2008 | Research Evaluation                                   | EM |   |   |   |   | Y |
| 10 |                    |      |                                                       |    |   |   |   |   |   |
| 11 | Gefen              | 2011 | Journal of Biomechanics                               | LE | Y |   | Y |   |   |
| 12 |                    |      |                                                       |    |   |   |   |   |   |
| 13 | Giminez-Toledo     | 2016 | Scientometrics                                        | EM |   |   |   |   | Y |
| 14 |                    |      |                                                       |    |   |   |   |   |   |
| 15 | Glänzel            | 2014 | Transinformação                                       | ED |   |   | Y |   | Y |
| 16 |                    |      |                                                       |    |   |   |   |   |   |
| 17 | Good               | 2015 | Research Evaluation                                   | ED |   |   |   |   | Y |
| 18 |                    |      |                                                       |    |   |   |   |   |   |
| 19 | Gorraiz            | 2010 | LIBER Quarterly                                       | ED |   | Y |   | Y | Y |
| 20 |                    |      |                                                       |    |   |   |   |   |   |
| 21 | Gracza             | 2008 | Library Collections Acquisitions & Technical Services | ED |   |   | Y | Y |   |
| 22 |                    |      |                                                       |    |   |   |   |   |   |
| 23 | Grisso             | 2017 | Journal of Women's Health                             | EM | Y |   |   |   |   |
| 24 |                    |      |                                                       |    |   |   |   |   |   |
| 25 | Grzybowski         | 2017 | Clinics in Dermatology                                | ED |   |   |   |   | Y |
| 26 |                    |      |                                                       |    |   |   |   |   |   |
| 27 | Gumpenberger       | 2016 | Scientometrics.                                       | ED | Y |   | Y | Y | Y |
| 28 |                    |      |                                                       |    |   |   |   |   |   |
| 29 | Haddad             | 2014 | The Bone and Joint Journal                            | ED |   |   |   | Y |   |
| 30 |                    |      |                                                       |    |   |   |   |   |   |
| 31 | Haddow             | 2015 | Research Evaluation                                   | EM |   |   |   |   |   |
| 32 |                    |      |                                                       |    |   |   |   |   |   |
| 33 | Haeffner-Cavaillon | 2009 | Archivum Immunologiae et Therapiae Experimentalis     | ED | Y |   | Y | Y | Y |
| 34 |                    |      |                                                       |    |   |   |   |   |   |
| 35 | Halbach            | 2011 | Annals of Anatomy                                     | EM |   | Y | Y |   | Y |
| 36 |                    |      |                                                       |    |   |   |   |   |   |
| 37 | Hall               | 2015 | Tourism Management                                    | ED |   |   |   | Y |   |
| 38 |                    |      |                                                       |    |   |   |   |   |   |
| 39 | Halvorson          | 2016 | Implications for Training in the Health Professions   | EM |   | Y | Y |   |   |
| 40 |                    |      |                                                       |    |   |   |   |   |   |
| 41 | Hamidreza          | 2013 | Acta Informatica Medica                               | EM |   |   | Y |   |   |
| 42 |                    |      |                                                       |    |   |   |   |   |   |
| 43 | Hammarfelt         | 2017 | Research Evaluation                                   | EM | Y |   | Y | Y |   |
| 44 |                    |      |                                                       |    |   |   |   |   |   |
| 45 | Han                | 2013 | ISSI                                                  | EM | Y |   |   | Y | Y |
| 46 |                    |      |                                                       |    |   |   |   |   |   |

|    |           |      |                                                                                         |    |   |   |   |   |     |
|----|-----------|------|-----------------------------------------------------------------------------------------|----|---|---|---|---|-----|
| 1  |           |      |                                                                                         |    |   |   |   |   |     |
| 2  |           |      |                                                                                         |    |   |   |   |   |     |
| 3  | Han       | 2010 | Journal of Animal and Veterinary Advances                                               | EM |   |   | Y | Y |     |
| 4  |           |      |                                                                                         |    |   |   |   |   |     |
| 5  | Haslam    | 2009 | Research Evaluation                                                                     | EM |   | Y | Y | Y |     |
| 6  |           |      |                                                                                         |    |   |   |   |   |     |
| 7  | Haslam    | 2010 | European Journal of Social Psychology                                                   | EM |   |   | Y | Y | Y Y |
| 8  |           |      |                                                                                         |    |   |   |   |   |     |
| 9  | Healy     | 2011 | Breast Cancer Research and Treatment                                                    | EM |   |   | Y |   |     |
| 10 |           |      |                                                                                         |    |   |   |   |   |     |
| 11 | Heinzl    | 2012 | AIP Conference Proceedings                                                              | ED |   |   | Y | Y | Y   |
| 12 |           |      |                                                                                         |    |   |   |   |   |     |
| 13 | Henrekson | 2011 | The Manchester School                                                                   | EM |   | Y | Y | Y | Y   |
| 14 |           |      |                                                                                         |    |   |   |   |   |     |
| 15 | Herteliu  | 2017 | Publications                                                                            | EM |   |   | Y |   |     |
| 16 |           |      |                                                                                         |    |   |   |   |   |     |
| 17 | Hew       | 2017 | Telematics and Informatics                                                              | EM |   | Y | Y | Y |     |
| 18 |           |      |                                                                                         |    |   |   |   |   |     |
| 19 | Hicks     | 2015 | Nature                                                                                  | ED |   |   | Y | Y |     |
| 20 |           |      |                                                                                         |    |   |   |   |   |     |
| 21 | Hicks     | 2015 | Nature                                                                                  | ED |   |   | Y | Y |     |
| 22 |           |      |                                                                                         |    |   |   |   |   |     |
| 23 | Hoffman   | 2014 | 47th Hawaii International Conference on System Sciences                                 | O  |   |   | Y | Y | Y   |
| 24 |           |      |                                                                                         |    |   |   |   |   |     |
| 25 | Holliday  | 2010 | International Journal of General Medicine                                               | EM | Y |   |   | Y | Y   |
| 26 |           |      |                                                                                         |    |   |   |   |   |     |
| 27 | Houser    | 2017 | Leukos                                                                                  | ED |   |   | Y | Y |     |
| 28 |           |      |                                                                                         |    |   |   |   |   |     |
| 29 | Hughes    | 2015 | International Journal of Radiation Oncology Biology Physics<br>NB Conference supplement | EM |   | Y | Y |   |     |
| 30 |           |      |                                                                                         |    |   |   |   |   |     |
| 31 | Hunt      | 2011 | Acta Neuropsychiatrica                                                                  | ED |   |   | Y | Y |     |
| 32 |           |      |                                                                                         |    |   |   |   |   |     |
| 33 | Hutchins  | 2016 | PLOS Biology                                                                            | EM |   |   |   |   | Y   |
| 34 |           |      |                                                                                         |    |   |   |   |   |     |
| 35 | Hyman     | 2014 | Molecular Biology of the Cell                                                           | ED |   |   |   |   |     |
| 36 |           |      |                                                                                         |    |   |   |   |   |     |
| 37 | Ibrahim   | 2015 | New Library World                                                                       | EM | Y | Y | Y |   | Y   |
| 38 |           |      |                                                                                         |    |   |   |   |   |     |
| 39 | Ioannidis | 2016 | PLOS Biology                                                                            | EM |   | Y | Y |   | Y   |
| 40 |           |      |                                                                                         |    |   |   |   |   |     |
| 41 | Ion       | 2017 | Chirurgia                                                                               | RE |   |   | Y | Y | Y   |
| 42 |           |      |                                                                                         |    |   |   |   |   |     |
| 43 | Iyendar   | 2009 | Academic Medicine                                                                       | EM |   |   |   | Y | Y   |
| 44 |           |      |                                                                                         |    |   |   |   |   |     |
| 45 |           |      |                                                                                         |    |   |   |   |   |     |
| 46 |           |      |                                                                                         |    |   |   |   |   |     |

1  
2  
3  
4  
5  
6  
7  
8  
9  
10  
11  
12  
13  
14  
15  
16  
17  
18  
19  
20  
21  
22  
23  
24  
25  
26  
27  
28  
29  
30  
31  
32  
33  
34  
35  
36  
37  
38  
39  
40  
41  
42  
43  
44  
45  
46

|         |      |                                                                                           |    |   |   |   |     |
|---------|------|-------------------------------------------------------------------------------------------|----|---|---|---|-----|
| Jackson | 2015 | Medical Journal of Australia                                                              | ED | Y |   |   |     |
| Jackson | 2011 | PLOS One                                                                                  | EM |   |   |   | Y   |
| Jacob   | 2007 | Scientometrics                                                                            | EM |   | Y |   | Y   |
| Jacso   | 2010 | Online Information Review                                                                 | EM |   |   |   | Y Y |
| Jacso   | 2008 | Online Information Review                                                                 | ED |   |   | Y |     |
| Jalil   | 2013 | IEEE International Conference on Teaching, Assessment and Learning for Engineering (TALE) | EM |   |   |   | Y   |
| Jamjoom | 2015 | Neurosciences                                                                             | EM |   |   | Y |     |
| Jamjoom | 2016 | World Neurosurgery                                                                        | EM |   |   | Y |     |
| Jan     | 2016 | Journal of Scientometric Research                                                         | EM |   |   | Y | Y   |
| Javey   | 2012 | American Chemical Society                                                                 | ED |   |   | Y | Y   |
| Jeang   | 2008 | Retrovirology                                                                             | ED |   |   | Y | Y   |
| Jokic   | 2009 | Biochemia Medica                                                                          | ED |   | Y | Y | Y   |
| Joshi   | 2014 | The Journal of Contemporary Dental Practice                                               | ED |   |   | Y | Y   |
| Joykson | 2015 | f1000 Research                                                                            | EM |   |   |   |     |
| Kaatz   | 2015 | Academic Medicine                                                                         | EM | Y |   |   |     |
| Kaatz   | 2016 | Academic Medicine                                                                         | EM | Y |   |   |     |
| Kali    | 2015 | Indian Journal of Pharmacology                                                            | ED |   | Y |   | Y   |
| Kalra   | 2013 | Journal of Neurosurgery-Pediatrics                                                        | EM |   |   | Y | Y   |
| Kaltman | 2014 | Circulation Research                                                                      | EM |   | Y |   |     |
| Kapoor  | 2013 | The Annals of Medical and Health Sciences Research                                        | ED |   |   |   | Y   |
| Kellner | 2008 | Anais Da Academia Brasileira De Ciencias                                                  | EM |   |   | Y |     |

|    |             |      |                                                                        |    |   |   |   |   |     |
|----|-------------|------|------------------------------------------------------------------------|----|---|---|---|---|-----|
| 1  |             |      |                                                                        |    |   |   |   |   |     |
| 2  |             |      |                                                                        |    |   |   |   |   |     |
| 3  | Khan        | 2013 | World Neurology                                                        | EM |   |   | Y |   |     |
| 4  |             |      |                                                                        |    |   |   |   |   |     |
| 5  | Knudson     | 2015 | Quest                                                                  | EM |   | Y |   |   |     |
| 6  |             |      |                                                                        |    |   |   |   |   |     |
| 7  | Kosmulski   | 2012 | Research Evaluation                                                    | ED |   | Y |   | Y |     |
| 8  |             |      |                                                                        |    |   |   |   |   |     |
| 9  | Krapivin    | 2009 | Complex Sciences                                                       | EM |   | Y | Y |   | Y Y |
| 10 |             |      |                                                                        |    |   |   |   |   |     |
| 11 | Kreiman     | 2011 | Frontiers in Computational Neuroscience                                | ED | Y | Y |   | Y | Y   |
| 12 |             |      |                                                                        |    |   |   |   |   |     |
| 13 | Kreines     | 2016 | Journal of Computer and Systems Sciences International                 | EM |   |   |   |   | Y   |
| 14 |             |      |                                                                        |    |   |   |   |   |     |
| 15 | Kshetry     | 2013 | World Neurosurgery                                                     | ED |   |   | Y | Y |     |
| 16 |             |      |                                                                        |    |   |   |   |   |     |
| 17 | Kulasagareh | 2010 | European Archives of Oto-Rhino-Laryngology                             | EM |   |   | Y |   |     |
| 18 |             |      |                                                                        |    |   |   |   |   |     |
| 19 | Kulczycki   | 2017 | Journal of Informetrics                                                | ED |   |   | Y |   |     |
| 20 |             |      |                                                                        |    |   |   |   |   |     |
| 21 | Kumar       | 2009 | Iete Technical Review                                                  | ED |   | Y | Y | Y |     |
| 22 |             |      |                                                                        |    |   |   |   |   |     |
| 23 | Kuo         | 2017 | Computers in Human Behavior                                            | EM |   |   |   |   | Y   |
| 24 |             |      |                                                                        |    |   |   |   |   |     |
| 25 | Lando       | 2014 | PLOS One                                                               | EM |   | Y | Y |   | Y   |
| 26 |             |      |                                                                        |    |   |   |   |   |     |
| 27 | Lariviere   | 2010 | Journal of the American Society for Information Science and Technology | EM |   |   |   | Y |     |
| 28 |             |      |                                                                        |    |   |   |   |   |     |
| 29 | Lariviere   | 2016 | PLOS One                                                               | EM |   | Y |   |   |     |
| 30 |             |      |                                                                        |    |   |   |   |   |     |
| 31 | Lariviere   | 2011 | Journal of Informetrics                                                | EM |   |   |   | Y |     |
| 32 |             |      |                                                                        |    |   |   |   |   |     |
| 33 | Lauer       | 2015 | The New England Journal of Medicine                                    | ED | Y |   |   |   |     |
| 34 |             |      |                                                                        |    |   |   |   |   |     |
| 35 | Law         | 2013 | Asia Pacific Journal of Tourism Research                               | EM | Y | Y |   | Y |     |
| 36 |             |      |                                                                        |    |   |   |   |   |     |
| 37 | Lee         | 2009 | Journal of neurosurgery                                                | EM |   |   | Y |   |     |
| 38 |             |      |                                                                        |    |   |   |   |   |     |
| 39 | Leff        | 2009 | International Journal of COPD                                          | ED |   |   |   | Y |     |
| 40 |             |      |                                                                        |    |   |   |   |   |     |
| 41 | Leydesdorff | 2016 | Scientometrics                                                         | ED |   |   | Y | Y | Y   |
| 42 |             |      |                                                                        |    |   |   |   |   |     |
| 43 | Li          | 2015 | Science                                                                | EM | Y |   |   |   |     |
| 44 |             |      |                                                                        |    |   |   |   |   |     |
| 45 |             |      |                                                                        |    |   |   |   |   |     |
| 46 |             |      |                                                                        |    |   |   |   |   |     |

1  
2  
3  
4  
5  
6  
7  
8  
9  
10  
11  
12  
13  
14  
15  
16  
17  
18  
19  
20  
21  
22  
23  
24  
25  
26  
27  
28  
29  
30  
31  
32  
33  
34  
35  
36  
37  
38  
39  
40  
41  
42  
43  
44  
45  
46

In: Nah FFH, Tan CH, eds. Hci in Business, Government, and Organizations: Ecommerce and Innovation, Pt I. Vol 97512016:61-71.

|            |      |                                                                                                                               |    |   |   |   |   |   |
|------------|------|-------------------------------------------------------------------------------------------------------------------------------|----|---|---|---|---|---|
| Li         | 2016 | In: Nah FFH, Tan CH, eds. Hci in Business, Government, and Organizations: Ecommerce and Innovation, Pt I. Vol 97512016:61-71. | EM | Y |   |   |   |   |
| Liang      | 2015 | IEEE International Conference on Smart City/SocialCom/SustainCom                                                              | EM |   |   |   |   | Y |
| Liao       | 2011 | Decision Support Systems                                                                                                      | EM |   | Y |   | Y |   |
| Lindner    | 2015 | PLOS One                                                                                                                      | EM | Y | Y |   |   |   |
| Lindner    | 2016 | American Journal of Evaluation                                                                                                | EM | Y |   |   |   |   |
| Lippi      | 2009 | Clinical Chemistry and Laboratory Medicine                                                                                    | ED |   |   | Y | Y |   |
| Lippi      | 2013 | Clinica Chimica Acta                                                                                                          | EM |   |   | Y | Y |   |
| Lippi      | 2017 | Annals of Translational Medicine                                                                                              | EM |   |   | Y | Y | Y |
| Lissoni    | 2011 | Industrial and Corporate Change                                                                                               | EM |   |   |   | Y |   |
| Littman    | 2017 | Medical Education Online                                                                                                      | EM |   | Y | Y | Y |   |
| Liu        | 2011 | Management Information Systems                                                                                                | EM |   | Y |   | Y | Y |
| Lopez      | 2015 | Journal of Surgical Education                                                                                                 | EM | Y |   | Y |   |   |
| Lopez      | 2015 | Journal of Hand Surgery America                                                                                               | EM |   | Y | Y |   |   |
| Lortie     | 2013 | Scientometrics                                                                                                                | EM |   | Y |   | Y |   |
| Lovegrove  | 2008 | BioScience                                                                                                                    | EM | Y |   | Y |   | Y |
| Lozano     | 2017 | Current Science                                                                                                               | ED |   | Y | Y |   | Y |
| MacMasters | 2017 | Academic Psychiatry                                                                                                           | EM |   | Y | Y |   |   |
| Maggio     | 2017 | Academic Medicine                                                                                                             | EM |   |   | Y |   | Y |
| Mali       | 2017 | Science & Public Policy                                                                                                       | EM |   |   |   |   |   |
| Markel     | 2017 | Journal of Pediatric Surgery                                                                                                  | EM |   | Y | Y |   | Y |



|    |            |      |                                                                        |    |   |   |   |   |   |
|----|------------|------|------------------------------------------------------------------------|----|---|---|---|---|---|
| 1  |            |      |                                                                        |    |   |   |   |   |   |
| 2  |            |      |                                                                        |    |   |   |   |   |   |
| 3  | Markpin    | 2008 | Scientometrics                                                         | EM |   |   | Y |   | Y |
| 4  |            |      |                                                                        |    |   |   |   |   |   |
| 5  | Marsh      | 2008 | American Psychologist                                                  | EM | Y |   |   |   |   |
| 6  |            |      |                                                                        |    |   |   |   |   |   |
| 7  | Marshall   | 2017 | Otolaryngology—Head and Neck Surgery                                   | EM |   |   | Y |   |   |
| 8  |            |      |                                                                        |    |   |   |   |   |   |
| 9  | Marzolla   | 2016 | Journal of Informetrics                                                | EM | Y |   | Y | Y |   |
| 10 |            |      |                                                                        |    |   |   |   |   |   |
| 11 | Mas-Bleder | 2013 | Scientometrics                                                         | EM |   | Y |   | Y |   |
| 12 |            |      |                                                                        |    |   |   |   |   |   |
| 13 | Matsas     | 2012 | Brazilian Journal of Physics                                           | EM |   |   |   |   | Y |
| 14 |            |      |                                                                        |    |   |   |   |   |   |
| 15 | Maunder    | 2007 | La Revue Canadienne de Psychiatrie                                     | EM |   |   | Y | Y | Y |
| 16 |            |      |                                                                        |    |   |   |   |   |   |
| 17 | Maximin    | 2014 | RadioGraphics                                                          | ED | Y | Y | Y |   | Y |
| 18 |            |      |                                                                        |    |   |   |   |   |   |
| 19 | Mazlounian | 2011 | PLOS One                                                               | EM |   |   |   |   | Y |
| 20 |            |      |                                                                        |    |   |   |   |   |   |
| 21 | Mazmanian  | 2014 | Evaluation & the Health Professions                                    | RE |   |   |   | Y |   |
| 22 |            |      |                                                                        |    |   |   |   |   |   |
| 23 | McAlister  | 2011 | American Heart Association Journals                                    | ED |   | Y | Y |   |   |
| 24 |            |      |                                                                        |    |   |   |   |   |   |
| 25 | McGovern   | 2013 | Academic Medicine                                                      | EM | Y | Y |   | Y |   |
| 26 |            |      |                                                                        |    |   |   |   |   |   |
| 27 | Medo       | 2016 | Physical Review                                                        | EM |   |   | Y | Y |   |
| 28 |            |      |                                                                        |    |   |   |   |   |   |
| 29 | Meho       | 2008 | Journal of the American Society for Information Science and Technology | EM |   | Y | Y |   |   |
| 30 |            |      |                                                                        |    |   |   |   |   |   |
| 31 | Mester     | 2016 | Interdisciplinary Description of Complex Systems                       | ED |   | Y | Y | Y |   |
| 32 |            |      |                                                                        |    |   |   |   |   |   |
| 33 | Metcalf    | 2010 | Radiologic Technology                                                  | EM |   |   |   |   |   |
| 34 |            |      |                                                                        |    |   |   |   |   |   |
| 35 | Milone     | 2016 | American Journal of Orthopedics                                        | EM | Y |   | Y |   | Y |
| 36 |            |      |                                                                        |    |   |   |   |   |   |
| 37 | Minasny    | 2013 | PeerJ                                                                  | EM |   | Y | Y |   |   |
| 38 |            |      |                                                                        |    |   |   |   |   |   |
| 39 | Mingers    | 2015 | European Journal of Operational Research                               | ED |   | Y | Y | Y |   |
| 40 |            |      |                                                                        |    |   |   |   |   |   |
| 41 | Mingers    | 2009 | Journal of the Operational Research Society                            | EM |   | Y | Y |   |   |
| 42 |            |      |                                                                        |    |   |   |   |   |   |
| 43 | Mingers    | 2017 | Scientometrics                                                         | EM |   | Y |   |   |   |
| 44 |            |      |                                                                        |    |   |   |   |   |   |
| 45 |            |      |                                                                        |    |   |   |   |   |   |
| 46 |            |      |                                                                        |    |   |   |   |   |   |

1  
2  
3  
4  
5  
6  
7  
8  
9  
10  
11  
12  
13  
14  
15  
16  
17  
18  
19  
20  
21  
22  
23  
24  
25  
26  
27  
28  
29  
30  
31  
32  
33  
34  
35  
36  
37  
38  
39  
40  
41  
42  
43  
44  
45  
46

|                         |      |                                                                        |    |   |   |   |   |   |   |   |
|-------------------------|------|------------------------------------------------------------------------|----|---|---|---|---|---|---|---|
| Mirnezami               | 2016 | Science and Public Policy                                              | EM | Y |   |   | Y |   |   |   |
| Misteli                 | 2013 | The Journal of Cell Biology                                            | ED |   |   | Y |   |   |   |   |
| Moed                    | 2015 | Journal of the Association for Information Science and Technology      | RE |   |   |   |   | Y |   |   |
| Moed                    | 2009 | Archivum Immunologiae et Therapia Experimentalis                       | ED |   |   | Y | Y | Y |   |   |
| Mooij                   | 2014 | Scientometrics                                                         | EM |   |   |   |   | Y | Y |   |
| Moppett                 | 2011 | British Journal of Anaesthesia                                         | EM | Y | Y | Y |   | Y | Y |   |
| Moreira                 | 2015 | PLOS One                                                               | EM |   |   | Y | Y |   | Y | Y |
| Morel                   | 2009 | PLOS Neglected Tropic Diseases                                         | EM |   |   | Y |   |   |   | Y |
| Moustafa                | 2016 | Accountability in Research-Policies and Quality Assurance              | ED |   |   | Y |   |   |   |   |
| Murphy                  | 2011 | Irish Journal of Medical Science                                       | EM |   |   | Y |   | Y |   |   |
| Murphy                  | 2017 | Nature                                                                 | ED |   |   |   |   |   | Y |   |
| Mutz                    | 2015 | Journal of the Association for Information Science and Technology      | EM | Y |   |   |   |   |   |   |
| Mutz                    | 2012 | Zeitschrift fur Psychologie                                            | EM | Y |   |   |   |   |   |   |
| Nah                     | 2009 | Journal of The American Society for Information Science and Technology | EM |   |   |   |   | Y | Y |   |
| Napolitano              | 2016 | Critical Care Medicine                                                 | ED |   |   | Y |   |   | Y |   |
| Nature Editorial Office | 2013 | Nature Letters                                                         | ED |   |   | Y |   | Y |   |   |
| Nature Editorial Office | 2017 | Nature                                                                 | ED |   |   |   |   | Y |   |   |
| Neufeld                 | 2011 | Research Evaluation                                                    | EM | Y |   |   | Y |   |   |   |
| Neylon                  | 2009 | PLOS Biology                                                           | ED |   |   | Y |   | Y |   |   |

|    |                 |      |                                                         |    |   |   |   |   |   |   |
|----|-----------------|------|---------------------------------------------------------|----|---|---|---|---|---|---|
| 1  |                 |      |                                                         |    |   |   |   |   |   |   |
| 2  |                 |      |                                                         |    |   |   |   |   |   |   |
| 3  | Nicol           | 2007 | Medical Journal of Australia                            | EM | Y | Y |   | Y |   |   |
| 4  |                 |      |                                                         |    |   |   |   |   |   |   |
| 5  | Nicolini        | 2008 | Scientometrics                                          | EM |   |   |   | Y | Y |   |
| 6  |                 |      |                                                         |    |   |   |   |   |   |   |
| 7  | Niederkröthaler | 2011 | BMC Public Health                                       | EM |   |   |   |   |   | Y |
| 8  |                 |      |                                                         |    |   |   |   |   |   |   |
| 9  | Nielsen         | 2017 | Studies in Higher Education                             | EM |   |   |   | Y | Y |   |
| 10 |                 |      |                                                         |    |   |   |   |   |   |   |
| 11 | Nigam           | 2012 | Indian Journal of Dermatology, Venerology and Leprology | ED |   |   |   | Y |   |   |
| 12 |                 |      |                                                         |    |   |   |   |   |   |   |
| 13 | Nightingale     | 2013 | Nurse Education in Practice                             | EM |   | Y | Y | Y |   | Y |
| 14 |                 |      |                                                         |    |   |   |   |   |   |   |
| 15 | Nosek           | 2010 | Personality and Social Psychology Bulletin              | EM |   |   |   | Y |   | Y |
| 16 |                 |      |                                                         |    |   |   |   |   |   |   |
| 17 | Nykl            | 2015 | Journal of Informetrics                                 | EM | Y |   |   | Y | Y |   |
| 18 |                 |      |                                                         |    |   |   |   |   |   |   |
| 19 | O'Brien         | 2012 | Oikos                                                   | ED |   |   |   |   |   |   |
| 20 |                 |      |                                                         |    |   |   |   |   |   |   |
| 21 | O'Connor        | 2010 | European Journal of Cancer Care                         | ED |   |   |   | Y | Y |   |
| 22 |                 |      |                                                         |    |   |   |   |   |   |   |
| 23 | Okhovati        | 2016 | Global Journal of Health Science                        | EM | Y | Y | Y | Y | Y |   |
| 24 |                 |      |                                                         |    |   |   |   |   |   |   |
| 25 | Oliveira        | 2013 | Revista Paulista de Pediatria                           | EM |   | Y | Y | Y | Y |   |
| 26 |                 |      |                                                         |    |   |   |   |   |   |   |
| 27 | Oliveira        | 2011 | Arquivos Brasileiros de Cardiologia                     | EM |   | Y | Y | Y |   |   |
| 28 |                 |      |                                                         |    |   |   |   |   |   |   |
| 29 | Oliveira        | 2013 | Scientometrics                                          | EM |   | Y | Y | Y | Y |   |
| 30 |                 |      |                                                         |    |   |   |   |   |   |   |
| 31 | Opthof          | 2009 | Netherlands Heart Journal                               | EM |   |   |   | Y | Y |   |
| 32 |                 |      |                                                         |    |   |   |   |   |   |   |
| 33 | Orduna-Malea    | 2015 | El Profesional de la Información                        | ED | Y | Y | Y | Y |   | Y |
| 34 |                 |      |                                                         |    |   |   |   |   |   |   |
| 35 | Osterloh        | 2015 | Evaluation Review                                       | EM | Y | Y |   | Y |   |   |
| 36 |                 |      |                                                         |    |   |   |   |   |   |   |
| 37 | Quimet          | 2011 | Scientometrics                                          | EM |   |   |   | Y |   | Y |
| 38 |                 |      |                                                         |    |   |   |   |   |   |   |
| 39 | Pagani          | 2015 | Scientometrics                                          | RE |   | Y |   | Y |   | Y |
| 40 |                 |      |                                                         |    |   |   |   |   |   |   |
| 41 | Pagel           | 2011 | British Journal of Anaesthesia                          | EM |   |   |   | Y |   |   |
| 42 |                 |      |                                                         |    |   |   |   |   |   |   |
| 43 | Pagel           | 2011 | Anaesthesia                                             | EM |   |   |   | Y |   | Y |
| 44 |                 |      |                                                         |    |   |   |   |   |   |   |
| 45 | Pagel           | 2015 | Original Investigations in Education                    | EM |   | Y | Y |   | Y |   |
| 46 |                 |      |                                                         |    |   |   |   |   |   |   |

|    |               |      |                                                      |    |   |   |   |   |   |   |
|----|---------------|------|------------------------------------------------------|----|---|---|---|---|---|---|
| 1  |               |      |                                                      |    |   |   |   |   |   |   |
| 2  |               |      |                                                      |    |   |   |   |   |   |   |
| 3  | Paik          | 2014 | Surgical Education                                   | EM |   |   | Y |   |   |   |
| 4  |               |      |                                                      |    |   |   |   |   |   |   |
| 5  | Pan           | 2014 | Science Reports                                      | EM |   |   | Y | Y |   | Y |
| 6  |               |      |                                                      |    |   |   |   |   |   |   |
| 7  | Pandit        | 2011 | Anaesthesia                                          | ED |   | Y | Y |   | Y |   |
| 8  |               |      |                                                      |    |   |   |   |   |   |   |
| 9  | Patel         | 2013 | Journal of the Royal Society of Medicine             | EM | Y | Y | Y | Y | Y | Y |
| 10 |               |      |                                                      |    |   |   |   |   |   |   |
| 11 | Patel         | 2011 | Journal of the Royal Society of Medicine             | RE |   | Y | Y | Y | Y |   |
| 12 |               |      |                                                      |    |   |   |   |   |   |   |
| 13 | Patrow        | 2011 | Journal of Postgraduate Medicine                     | ED |   |   | Y |   |   |   |
| 14 |               |      |                                                      |    |   |   |   |   |   |   |
| 15 | Pepe          | 2012 | PLOS One                                             | EM |   |   | Y |   |   | Y |
| 16 |               |      |                                                      |    |   |   |   |   |   |   |
| 17 | Pereyra-Rojas | 2017 | Frontiers in Psychology                              | EM | Y |   | Y |   | Y |   |
| 18 |               |      |                                                      |    |   |   |   |   |   |   |
| 19 | Perlin        | 2017 | Journal of Informetrics                              | EM |   | Y |   | Y |   |   |
| 20 |               |      |                                                      |    |   |   |   |   |   |   |
| 21 | Persson       | 2014 | Acta Physiologica                                    | ED |   |   |   |   |   | Y |
| 22 |               |      |                                                      |    |   |   |   |   |   |   |
| 23 | Peters        | 2017 | Journal of Infometrics                               | ED |   |   |   | Y |   |   |
| 24 |               |      |                                                      |    |   |   |   |   |   |   |
| 25 | Petersen      | 2013 | Journal of Informetrics                              | EM |   |   |   |   |   | Y |
| 26 |               |      |                                                      |    |   |   |   |   |   |   |
| 27 | Petersen      | 2010 | Physical Review                                      | EM |   |   |   |   |   |   |
| 28 |               |      |                                                      |    |   |   |   |   |   |   |
| 29 | Pinnock       | 2012 | Nurse Education Today                                | ED |   | Y |   | Y |   |   |
| 30 |               |      |                                                      |    |   |   |   |   |   |   |
| 31 | Pöder         | 2017 | Trames-Journal of the Humanities and Social Sciences | EM |   |   | Y |   |   | Y |
| 32 |               |      |                                                      |    |   |   |   |   |   |   |
| 33 | Prabhu        | 2017 | World Neurosurgery                                   | ED |   |   | Y | Y | Y | Y |
| 34 |               |      |                                                      |    |   |   |   |   |   |   |
| 35 | Prathap       | 2016 | Scientometrics                                       | EM |   | Y |   | Y |   |   |
| 36 |               |      |                                                      |    |   |   |   |   |   |   |
| 37 | Prathap       | 2012 | Scientometrics                                       | EM |   |   | Y | Y | Y |   |
| 38 |               |      |                                                      |    |   |   |   |   |   |   |
| 39 | Prathap       | 2014 | Scientometrics                                       | EM |   |   | Y |   |   | Y |
| 40 |               |      |                                                      |    |   |   |   |   |   |   |
| 41 | Prathap       | 2017 | Current Science                                      | ED |   | Y | Y | Y |   | Y |
| 42 |               |      |                                                      |    |   |   |   |   |   |   |
| 43 | Pringle       | 2008 | Learned Publishing                                   | ED |   | Y | Y | Y | Y |   |
| 44 |               |      |                                                      |    |   |   |   |   |   |   |
| 45 | Pshetizky     | 2009 | Journal of the American Board of Family Medicine     | EM |   | Y |   | Y |   |   |
| 46 |               |      |                                                      |    |   |   |   |   |   |   |

|    |                   |      |                                                                                 |    |   |   |   |   |   |
|----|-------------------|------|---------------------------------------------------------------------------------|----|---|---|---|---|---|
| 1  |                   |      |                                                                                 |    |   |   |   |   |   |
| 2  |                   |      |                                                                                 |    |   |   |   |   |   |
| 3  | Pugh Jr           | 2013 | Journal of General Physiology                                                   | ED |   |   |   | Y |   |
| 4  |                   |      |                                                                                 |    |   |   |   |   |   |
| 5  | Pulina            | 2007 | Italian Journal of Animal Science                                               | EM |   | Y | Y | Y | Y |
| 6  |                   |      |                                                                                 |    |   |   |   |   |   |
| 7  | Pyke              | 2015 | BioScience                                                                      | ED |   |   |   |   | Y |
| 8  |                   |      |                                                                                 |    |   |   |   |   |   |
| 9  | Qi                | 2016 | Scientometrics                                                                  | EM |   | Y |   |   |   |
| 10 |                   |      |                                                                                 |    |   |   |   |   |   |
| 11 | Quigley           | 2012 | Journal of Cancer Education                                                     | EM |   |   | Y |   |   |
| 12 |                   |      |                                                                                 |    |   |   |   |   |   |
| 13 | Rad               | 2012 | Academic Radiology                                                              | EM |   |   | Y |   |   |
| 14 |                   |      |                                                                                 |    |   |   |   |   |   |
| 15 | Radicchi          | 2008 | Proceedings of the National Academy of Sciences of the United States of America | EM |   | Y | Y |   | Y |
| 16 |                   |      |                                                                                 |    |   |   |   |   |   |
| 17 | Radicchi          | 2012 | Journal of Informetrics                                                         | EM |   | Y |   |   | Y |
| 18 |                   |      |                                                                                 |    |   |   |   |   |   |
| 19 | Raj               | 2016 | Academic Medicine                                                               | EM |   | Y | Y |   | Y |
| 20 |                   |      |                                                                                 |    |   |   |   |   |   |
| 21 | Ramasesha         | 2011 | Current Science                                                                 | ED |   | Y | Y | Y | Y |
| 22 |                   |      |                                                                                 |    |   |   |   |   |   |
| 23 | Rana              | 2013 | Journal of Cancer Education                                                     | EM |   | Y | Y |   |   |
| 24 |                   |      |                                                                                 |    |   |   |   |   |   |
| 25 | Ravenscroft       | 2017 | PLOS One                                                                        | EM |   |   | Y | Y | Y |
| 26 |                   |      |                                                                                 |    |   |   |   |   |   |
| 27 | Rey-Rocha         | 2015 | Scientometrics                                                                  | EM |   | Y |   |   |   |
| 28 |                   |      |                                                                                 |    |   |   |   |   |   |
| 29 | Rezek             | 2011 | Academic Radiology                                                              | EM |   |   |   |   |   |
| 30 |                   |      |                                                                                 |    |   |   |   |   |   |
| 31 | Ribas             | 2015 | Proceedings of the 24th International Conference on World Wide Web              | O  | Y | Y | Y |   | Y |
| 32 |                   |      |                                                                                 |    |   |   |   |   |   |
| 33 | Ribas             | 2015 | arXiv                                                                           | ED |   |   |   |   | Y |
| 34 |                   |      |                                                                                 |    |   |   |   |   |   |
| 35 | Ricker            | 2009 | Interciencia                                                                    | ED | Y |   |   | Y | Y |
| 36 |                   |      |                                                                                 |    |   |   |   |   |   |
| 37 | Rieder            | 2010 | Langenbeck's Archives of Surgery                                                | ED |   |   | Y |   | Y |
| 38 |                   |      |                                                                                 |    |   |   |   |   |   |
| 39 | Robinson          | 2011 | Journal of School Psychology                                                    | ED |   |   |   | Y |   |
| 40 |                   |      |                                                                                 |    |   |   |   |   |   |
| 41 | Rodriguez-Navarro | 2011 | PLOS One                                                                        | EM |   |   |   |   | Y |
| 42 |                   |      |                                                                                 |    |   |   |   |   |   |
| 43 | Ronai             | 2012 | Pigment Cell and Melanoma research                                              | ED | Y | Y |   |   |   |
| 44 |                   |      |                                                                                 |    |   |   |   |   |   |
| 45 |                   |      |                                                                                 |    |   |   |   |   |   |
| 46 |                   |      |                                                                                 |    |   |   |   |   |   |

|    |               |      |                                                |    |   |   |   |   |   |
|----|---------------|------|------------------------------------------------|----|---|---|---|---|---|
| 1  |               |      |                                                |    |   |   |   |   |   |
| 2  |               |      |                                                |    |   |   |   |   |   |
| 3  | Rons          | 2009 | Research Evaluation                            | EM |   |   |   |   |   |
| 4  |               |      |                                                |    |   |   |   |   |   |
| 5  | Rosati        | 2016 | Journal of Cardiac Surgery                     | EM |   | Y |   |   |   |
| 6  |               |      |                                                |    |   |   |   |   |   |
| 7  | Ruane         | 2009 | Scientometrics                                 | EM |   | Y | Y |   | Y |
| 8  |               |      |                                                |    |   |   |   |   |   |
| 9  | Saad          | 2010 | Scientometrics                                 | EM |   |   | Y |   |   |
| 10 |               |      |                                                |    |   |   |   |   |   |
| 11 | Safdar        | 2015 | Society for Academic Emergency Medicine (SAEM) | EM | Y |   |   |   |   |
| 12 |               |      |                                                |    |   |   |   |   |   |
| 13 | Sahel         | 2011 | Science Translational Medicine                 | ED |   | Y | Y | Y |   |
| 14 |               |      |                                                |    |   |   |   |   |   |
| 15 | Sahoo         | 2017 | Omega                                          | EM |   | Y | Y | Y | Y |
| 16 |               |      |                                                |    |   |   |   |   |   |
| 17 | Saleem        | 2011 | Internal Archives of Medicine                  | ED |   |   | Y | Y |   |
| 18 |               |      |                                                |    |   |   |   |   |   |
| 19 | Sangam        | 2008 | Current Science                                | ED |   |   | Y | Y |   |
| 20 |               |      |                                                |    |   |   |   |   |   |
| 21 | Santangelo    | 2017 | Molecular Biology of the Cell                  | ED |   |   |   | Y | Y |
| 22 |               |      |                                                |    |   |   |   |   |   |
| 23 | Saraykar      | 2017 | Academic Psychiatry                            | EM |   |   | Y |   |   |
| 24 |               |      |                                                |    |   |   |   |   |   |
| 25 | Sarli         | 2016 | Missouri Medicine                              | ED |   |   |   | Y | Y |
| 26 |               |      |                                                |    |   |   |   |   | Y |
| 27 | Satyanarayana | 2008 | Indian Journal of Medical Research             | ED |   |   | Y | Y |   |
| 28 |               |      |                                                |    |   |   |   |   |   |
| 29 | Saxena        | 2013 | Journal of Pharmacology Pharmacotherapeutics   | EM |   |   | Y | Y | Y |
| 30 |               |      |                                                |    |   |   |   |   | Y |
| 31 | Sebire        | 2008 | Ultrasound in Obstetrics and Gynaecology       | ED |   |   | Y |   | Y |
| 32 |               |      |                                                |    |   |   |   |   | Y |
| 33 | Selek         | 2014 | Scientometrics                                 | EM |   | Y | Y |   | Y |
| 34 |               |      |                                                |    |   |   |   |   |   |
| 35 | Seo           | 2017 | Management Decision                            | EM |   |   |   | Y |   |
| 36 |               |      |                                                |    |   |   |   |   |   |
| 37 | Shanta        | 2013 | Journal of Medical Physics                     | ED |   | Y | Y | Y |   |
| 38 |               |      |                                                |    |   |   |   |   |   |
| 39 | Shibayama     | 2015 | Research Policy                                | EM |   | Y |   | Y |   |
| 40 |               |      |                                                |    |   |   |   |   |   |
| 41 | Sibbald       | 2015 | Journal of the Medical Library Association     | ED |   |   |   |   | Y |
| 42 |               |      |                                                |    |   |   |   |   |   |
| 43 | Simons        | 2008 | Science                                        | ED |   |   |   | Y |   |
| 44 |               |      |                                                |    |   |   |   |   |   |
| 45 | Sittig        | 2015 | MEDINFO 2015: eHealth-enabled Health           | EM |   | Y | Y |   | Y |
| 46 |               |      |                                                |    |   |   |   |   |   |

|    |                  |      |                                                                                 |    |   |   |   |   |   |
|----|------------------|------|---------------------------------------------------------------------------------|----|---|---|---|---|---|
| 1  |                  |      |                                                                                 |    |   |   |   |   |   |
| 2  |                  |      |                                                                                 |    |   |   |   |   |   |
| 3  | Slim             | 2017 | Anaesthesia, Critical Care & Pain Medicine                                      | ED |   | Y | Y |   | Y |
| 4  |                  |      |                                                                                 |    |   |   |   |   |   |
| 5  | Slyder           | 2011 | Scientometrics                                                                  | EM | Y |   |   |   |   |
| 6  |                  |      |                                                                                 |    |   |   |   |   |   |
| 7  | Smeyers          | 2011 | Journal of Philosophy of Education                                              | ED | Y |   | Y |   |   |
| 8  |                  |      |                                                                                 |    |   |   |   |   |   |
| 9  | Smith            | 2008 | Bone & Joint Journal                                                            | ED |   |   | Y |   |   |
| 10 |                  |      |                                                                                 |    |   |   |   |   |   |
| 11 | Soares de Araujo | 2011 | Revista Brasileira de Medicina do Esporte                                       | EM |   | Y | Y | Y |   |
| 12 |                  |      |                                                                                 |    |   |   |   |   |   |
| 13 | Sobhy            | 2016 | Embo Reports                                                                    | ED |   |   | Y |   |   |
| 14 |                  |      |                                                                                 |    |   |   |   |   |   |
| 15 | Sobkowicz        | 2015 | Journal of Artificial Societies and Social Simulation                           | EM | Y |   |   |   |   |
| 16 |                  |      |                                                                                 |    |   |   |   |   |   |
| 17 | Solarino         | 2012 | Annals of Geophysics                                                            | RE | Y | Y | Y |   | Y |
| 18 |                  |      |                                                                                 |    |   |   |   |   |   |
| 19 | Sood             | 2015 | Eplasty                                                                         | EM |   | Y |   |   |   |
| 20 |                  |      |                                                                                 |    |   |   |   |   |   |
| 21 | Sorenson         | 2011 | Journal of Parkinson's Disease                                                  | EM | Y | Y |   |   | Y |
| 22 |                  |      |                                                                                 |    |   |   |   |   |   |
| 23 | Spaan            | 2009 | Medical & Biological Engineering & Computing                                    | ED |   | Y | Y |   |   |
| 24 |                  |      |                                                                                 |    |   |   |   |   |   |
| 25 | Spearman         | 2010 | Journal of Neurosurgery                                                         | EM |   | Y |   |   |   |
| 26 |                  |      |                                                                                 |    |   |   |   |   |   |
| 27 | Spreckelsen      | 2011 | BMC Medical Informatics and Decision Making                                     | EM |   | Y | Y | Y |   |
| 28 |                  |      |                                                                                 |    |   |   |   |   |   |
| 29 | Staller          | 2017 | Qualitative Social Work                                                         | ED | Y | Y |   |   | Y |
| 30 |                  |      |                                                                                 |    |   |   |   |   |   |
| 31 | Stallings        | 2013 | Proceedings of the National Academy of Sciences of the United States of America | EM | Y | Y |   |   | Y |
| 32 |                  |      |                                                                                 |    |   |   |   |   |   |
| 33 | Street           | 2009 | Health Research Policy and System                                               | EM | Y |   |   |   |   |
| 34 |                  |      |                                                                                 |    |   |   |   |   |   |
| 35 | Stroebe          | 2010 | American Psychologist                                                           | ED | Y |   |   | Y |   |
| 36 |                  |      |                                                                                 |    |   |   |   |   |   |
| 37 | Stroobants       | 2013 | Nature                                                                          | ED |   |   |   |   |   |
| 38 |                  |      |                                                                                 |    |   |   |   |   |   |
| 39 | Sturmer          | 2013 | Revista Brasileira De Fisioterapia                                              | EM | Y | Y |   |   |   |
| 40 |                  |      |                                                                                 |    |   |   |   |   |   |
| 41 | Suiter           | 2015 | The Journal of Academic Librarianship                                           | EM |   | Y | Y | Y | Y |
| 42 |                  |      |                                                                                 |    |   |   |   |   |   |
| 43 | Suminski         | 2012 | The Journal of the American Osteopathic Association                             | EM | Y |   | Y | Y |   |
| 44 |                  |      |                                                                                 |    |   |   |   |   |   |
| 45 |                  |      |                                                                                 |    |   |   |   |   |   |
| 46 |                  |      |                                                                                 |    |   |   |   |   |   |

1  
2  
3  
4  
5  
6  
7  
8  
9  
10  
11  
12  
13  
14  
15  
16  
17  
18  
19  
20  
21  
22  
23  
24  
25  
26  
27  
28  
29  
30  
31  
32  
33  
34  
35  
36  
37  
38  
39  
40  
41  
42  
43  
44  
45  
46

|                  |      |                                              |    |   |   |   |   |   |   |   |
|------------------|------|----------------------------------------------|----|---|---|---|---|---|---|---|
| Surla            | 2017 | The Electronic Library                       | ED |   | Y |   | Y |   |   | Y |
| Susarla          | 2015 | Plastic and Reconstructive surgery           | EM |   | Y | Y |   |   |   |   |
| Susarla          | 2015 | Journal of Dental Education                  | EM | Y |   | Y |   |   |   |   |
| Sutherland       | 2011 | PLOS One                                     | EM | Y |   |   | Y |   |   |   |
| Svider           | 2013 | Laryngoscope                                 | EM |   |   | Y |   |   |   |   |
| Svider           | 2014 | Ophthalmology                                | EM | Y |   | Y |   |   |   |   |
| Svider           | 2013 | Laryngoscope                                 | EM | Y |   | Y |   |   |   |   |
| Svider           | 2013 | Laryngoscope                                 | EM |   |   | Y |   | Y |   |   |
| Swanson          | 2016 | Annals of Plastic Surgery                    | EM |   |   | Y |   |   |   |   |
| Szklo            | 2008 | Epidemiology                                 | ED |   |   |   | Y |   |   |   |
| Szymanski        | 2012 | Information Sciences                         | EM |   |   | Y | Y | Y |   | Y |
| Taborsky         | 2007 | International Journal of Behavioural Biology | ED | Y |   |   |   |   |   |   |
| Tan              | 2016 | The Annals of Applied Statistics             | EM |   | Y | Y | Y |   | Y | Y |
| Tandon           | 2015 | National Academy Science Letters-India       | ED |   |   |   | Y |   |   |   |
| Taylor           | 2015 | Poultry Science                              | ED |   |   | Y | Y |   | Y |   |
| Teixeira         | 2013 | PLOS One                                     | EM |   |   | Y |   |   |   |   |
| Tenreiro Machado | 2017 | Entropy                                      | EM | Y |   |   |   | Y |   |   |
| Thelwall         | 2017 | Aslib Journal of Information Management      | EM |   |   |   |   |   | Y |   |
| Therattil        | 2016 | Annals of Plastic Surgery                    | EM |   |   | Y |   |   |   |   |
| Thomaz           | 2011 | Arquivos Brasileiros De Cardiologia          | ED |   |   | Y | Y | Y |   |   |
| Thorngate        | 2014 | Advances in Social Simulation                | EM | Y |   |   |   |   |   |   |
| Tijdink          | 2016 | BMJ Open                                     | EM |   |   |   |   |   |   |   |



|    |                   |      |                                                                                 |    |   |   |   |   |   |
|----|-------------------|------|---------------------------------------------------------------------------------|----|---|---|---|---|---|
| 1  |                   |      |                                                                                 |    |   |   |   |   |   |
| 2  |                   |      |                                                                                 |    |   |   |   |   |   |
| 3  | Timothy           | 2015 | Tourism Management                                                              | ED |   |   |   | Y |   |
| 4  |                   |      |                                                                                 |    |   |   |   |   |   |
| 5  | Torrisi           | 2014 | Scientometrics                                                                  | EM | Y |   | Y | Y | Y |
| 6  |                   |      |                                                                                 |    |   |   |   |   |   |
| 7  | Tricco            | 2017 | PLOS One                                                                        | RE | Y |   |   |   |   |
| 8  |                   |      |                                                                                 |    |   |   |   |   |   |
| 9  | Trueger           | 2015 | Annals of Emergency Medicine                                                    | ED |   |   | Y | Y | Y |
| 10 |                   |      |                                                                                 |    |   |   |   |   |   |
| 11 | Tschudy           | 2016 | Journal of Pediatrics                                                           | EM |   |   | Y |   | Y |
| 12 |                   |      |                                                                                 |    |   |   |   |   |   |
| 13 | Tse               | 2008 | Nature                                                                          | ED |   |   | Y | Y | Y |
| 14 |                   |      |                                                                                 |    |   |   |   |   |   |
| 15 | Tuitt             | 2011 | Canadian Journal of Gastroenterology                                            | EM |   |   | Y | Y | Y |
| 16 |                   |      |                                                                                 |    |   |   |   |   |   |
| 17 | Usmani            | 2011 | Sudanese Journal of Paediatrics                                                 | ED |   |   | Y | Y |   |
| 18 |                   |      |                                                                                 |    |   |   |   |   |   |
| 19 | Valsangkar        | 2016 | Surgery                                                                         | EM |   | Y | Y |   | Y |
| 20 |                   |      |                                                                                 |    |   |   |   |   |   |
| 21 | van Arensbergen   | 2012 | Higher Education Policy                                                         | EM | Y |   |   |   |   |
| 22 |                   |      |                                                                                 |    |   |   |   |   |   |
| 23 | van den Besselaar | 2009 | Research Evaluation                                                             | EM | Y | Y |   |   |   |
| 24 |                   |      |                                                                                 |    |   |   |   |   |   |
| 25 | van Eck           | 2013 | PLOS One                                                                        | EM |   | Y |   |   |   |
| 26 |                   |      |                                                                                 |    |   |   |   |   |   |
| 27 | van Leeuwen       | 2008 | Research Evaluation                                                             | EM |   |   | Y |   |   |
| 28 |                   |      |                                                                                 |    |   |   |   |   |   |
| 29 | van Leeuwen       | 2012 | Research Evaluation                                                             | EM | Y |   |   |   |   |
| 30 |                   |      |                                                                                 |    |   |   |   |   |   |
| 31 | van Noorden       | 2010 | Nature                                                                          | ED |   |   | Y | Y | Y |
| 32 |                   |      |                                                                                 |    |   |   |   |   |   |
| 33 | van Wesel         | 2016 | Science and Engineering Ethics                                                  | EM |   |   |   |   |   |
| 34 |                   |      |                                                                                 |    |   |   |   |   |   |
| 35 | Vaughan           | 2017 | Scientometrics                                                                  | EM |   |   |   |   | Y |
| 36 |                   |      |                                                                                 |    |   |   |   |   |   |
| 37 | Verma             | 2015 | Proceedings of the National Academy of Sciences of the United States of America | ED | Y |   |   | Y |   |
| 38 |                   |      |                                                                                 |    |   |   |   |   |   |
| 39 | Vico              | 2015 | Prometheus                                                                      | EM | Y |   |   |   |   |
| 40 |                   |      |                                                                                 |    |   |   |   |   |   |
| 41 | Vieira            | 2011 | Scientometrics                                                                  | EM |   |   |   |   | Y |
| 42 |                   |      |                                                                                 |    |   |   |   |   |   |
| 43 | Vinkler           | 2012 | Journal of Informetrics                                                         | ED |   |   |   | Y |   |
| 44 |                   |      |                                                                                 |    |   |   |   |   |   |
| 45 |                   |      |                                                                                 |    |   |   |   |   |   |
| 46 |                   |      |                                                                                 |    |   |   |   |   |   |

1  
2  
3  
4  
5  
6  
7  
8  
9  
10  
11  
12  
13  
14  
15  
16  
17  
18  
19  
20  
21  
22  
23  
24  
25  
26  
27  
28  
29  
30  
31  
32  
33  
34  
35  
36  
37  
38  
39  
40  
41  
42  
43  
44  
45  
46

|              |      |                                                                                                                                                  |    |   |   |   |   |   |   |
|--------------|------|--------------------------------------------------------------------------------------------------------------------------------------------------|----|---|---|---|---|---|---|
| Vinyard      | 2016 | Computers in libraries                                                                                                                           | ED |   |   | Y | Y |   | Y |
| von Bartheld | 2015 | PeerJ                                                                                                                                            | EM |   |   | Y | Y | Y |   |
| Wacogne      | 2016 | Archives of Disease in Childhood-Education and Practice Edition                                                                                  | ED |   |   | Y | Y | Y | Y |
| Wagner       | 2012 | Research Evaluation                                                                                                                              | ED |   | Y |   |   |   | Y |
| Waisbren     | 2008 | Journal of Women's Health                                                                                                                        | EM |   |   |   |   |   |   |
| Walijee      | 2015 | Plastic and Reconstructive Surgery                                                                                                               | ED |   |   |   |   |   | Y |
| Walker       | 2010 | BMC Medical Education                                                                                                                            | EM |   | Y |   | Y | Y |   |
| Wallace      | 2012 | PLOS One                                                                                                                                         | EM | Y | Y |   |   |   |   |
| Walters      | 2011 | Journal of the American Society for Information Science and Technology                                                                           | EM | Y | Y |   | Y |   |   |
| Waltman      | 2013 | In: Gorraiz J, Schiebel E, Gumpenberger C, Horlesberger M, Moed H, eds. 14th International Society of Scientometrics and Informetrics Conference | EM |   | Y | Y |   |   | Y |
| Waltman      | 2013 | Journal of Informetrics                                                                                                                          | EM |   | Y |   |   |   |   |
| Wang         | 2013 | Science                                                                                                                                          | EM |   |   | Y | Y | Y | Y |
| Ward         | 2012 | Anaesthesia                                                                                                                                      | ED |   |   |   |   |   |   |
| Watson       | 2015 | Journal of Pediatric Surgery                                                                                                                     | EM |   | Y | Y |   |   |   |
| Welk         | 2014 | Research Quarterly for Exercise and Sport                                                                                                        | ED |   |   |   | Y |   |   |
| Wieczorek    | 2016 | Financial Environment and Business Development                                                                                                   | ED |   | Y | Y | Y |   |   |
| Wildgaard    | 2014 | Scientometrics                                                                                                                                   | RE |   | Y | Y | Y | Y |   |
| Williamson   | 2008 | Family Medicine                                                                                                                                  | EM |   |   |   |   |   | Y |
| Wootton      | 2013 | Health Research Policy and Systems                                                                                                               | EM | Y |   |   | Y |   | Y |
| Würtz        | 2016 | Annals of Epidemiology                                                                                                                           | RE |   |   | Y |   |   |   |

|    |             |      |                                                   |    |   |   |   |   |
|----|-------------|------|---------------------------------------------------|----|---|---|---|---|
| 1  |             |      |                                                   |    |   |   |   |   |
| 2  |             |      |                                                   |    |   |   |   |   |
| 3  | Wykes       | 2013 | Journal of Mental Health                          | ED |   | Y | Y |   |
| 4  |             |      |                                                   |    |   |   |   |   |
| 5  | Yaminfirooz | 2015 | The Electronic Library                            | EM |   | Y |   | Y |
| 6  |             |      |                                                   |    |   |   |   |   |
| 7  | Yang        | 2013 | Journal of Informetrics                           | EM | Y | Y |   | Y |
| 8  |             |      |                                                   |    |   |   |   |   |
| 9  | Yates       | 2015 | Source Code for Biology and Medicine              | EM | Y |   |   |   |
| 10 |             |      |                                                   |    |   |   |   |   |
| 11 | Yu          | 2016 | Computers in Human Behaviour                      | EM |   |   |   | Y |
| 12 |             |      |                                                   |    |   |   |   |   |
| 13 | Ze          | 2012 | International Conference on Intelligent Computing | EM |   | Y | Y |   |
| 14 |             |      |                                                   |    |   |   |   |   |
| 15 | Zhang       | 2012 | Scientometrics                                    | EM |   |   |   | Y |
| 16 |             |      |                                                   |    |   |   |   |   |
| 17 | Zhang       | 2017 | PLOS One                                          | EM |   | Y | Y |   |
| 18 |             |      |                                                   |    |   |   |   |   |
| 19 | Zhang       | 2012 | Scientometrics                                    | EM |   | Y | Y | Y |
| 20 |             |      |                                                   |    |   |   |   |   |
| 21 | Zhao        | 2014 | Scientometrics                                    | EM | Y |   | Y | Y |
| 22 |             |      |                                                   |    |   |   |   |   |
| 23 | Zhou        | 2012 | New Journal of Physics                            | EM |   |   | Y | Y |
| 24 |             |      |                                                   |    |   |   |   |   |
| 25 | Zhu         | 2015 | arXiv                                             | EM |   |   |   | Y |
| 26 |             |      |                                                   |    |   |   |   |   |
| 27 | Zhuo        | 2008 | Molecular Pain                                    | EM | Y |   | Y | Y |
| 28 |             |      |                                                   |    |   |   |   |   |
| 29 | Zima        | 2008 | Biochemia Medica                                  | ED |   |   | Y | Y |
| 30 |             |      |                                                   |    |   |   |   |   |
| 31 | Zou         | 2016 | Scientometrics                                    | EM |   | Y | Y | Y |
| 32 |             |      |                                                   |    |   |   |   |   |
| 33 | Zupetic     | 2017 | Academic Radiology                                | EM |   | Y |   |   |
| 34 |             |      |                                                   |    |   |   |   |   |
| 35 | Zyczkowski  | 2010 | Scientometrics                                    | ED |   |   |   | Y |

<sup>^</sup>Empirical (EM); Editorial/Opinion (ED); Review (RE); Other (O).

Appendix 3: New models and metrics for assessing an individual researcher’s achievement (2007-2017)

| First author | Year | Journal name                                  | Level      | Metric or Model | Name                          | Basis                                     | Description                                                                                                                                                                                                                                                                                                                                                         |
|--------------|------|-----------------------------------------------|------------|-----------------|-------------------------------|-------------------------------------------|---------------------------------------------------------------------------------------------------------------------------------------------------------------------------------------------------------------------------------------------------------------------------------------------------------------------------------------------------------------------|
| Anderson     | 2008 | Scientometrics                                | Researcher | Metric          | Tapered h-index               | h-index                                   | It accounts for the tapered distribution of citations.                                                                                                                                                                                                                                                                                                              |
| Aragon       | 2013 | Nature Scientific Reports                     | Both       | Metric          | Scientist impact ( $\Phi$ )   | Author contributions and citation counts  | Instead of the total number of citations, the proposed measure $\Phi$ (Scientist Impact) aims at discerning the genuine number of people (specifically lead authors) the paper (or first author) has had an impact upon by removing self-citation. In other words, $\Phi$ aims at measuring the paper's reach.                                                      |
| Assimakis    | 2010 | Scientometrics                                | Researcher | Metric          | The Golden Productivity Index | Author contribution and publication count | A rank dependent index that measures the productivity of an individual researcher by evaluating the number of papers as well as the rank of co-authorship. It emphasizes the first author's contribution.                                                                                                                                                           |
| Bai          | 2016 | PLOS One                                      | Researcher | Metric          | COIRank algorithm             | Network analysis                          | Quantifies scientific impact by reproducing the accumulated COI relationship in the scientific community. COIRank focuses on improving PageRank though setting a weight for PageRank algorithm and promotes the performance in identifying influential articles. It therefore accounts for self-citation and citation by others at the same institution.            |
| Belikov      | 2015 | f1000 Research                                | Researcher | Metric          | L-index                       | h-index and author contribution           | Accounts for co-author contribution by designating citations to each individual author according to their order on a paper. It also considers the age of publications, favoring newer ones. However, if a scientist has made a significant scientific breakthrough and ceases publications, his or her L-index will remain high regardless. It ranges from 0.0-9.9. |
| Bini         | 2008 | Electronic Transactions on Numerical Analysis | Both       | Metric          | Information not available     | Citation count                            | Proposes to integrate models for evaluating papers, authors, and journals based on citations, co-authorship and publications. After the one-class model for ranking scientific publications, they introduced the two-class model which ranks papers and authors, and the three-class model for ranking papers, authors, and journals.                               |

|    |             |      |                                                         |            |        |                                                                      |                                  |                                                                                                                                                                                                                                                                                                                                                                                                                                                                                                                                                                                                                                                                                                                                                                                                    |
|----|-------------|------|---------------------------------------------------------|------------|--------|----------------------------------------------------------------------|----------------------------------|----------------------------------------------------------------------------------------------------------------------------------------------------------------------------------------------------------------------------------------------------------------------------------------------------------------------------------------------------------------------------------------------------------------------------------------------------------------------------------------------------------------------------------------------------------------------------------------------------------------------------------------------------------------------------------------------------------------------------------------------------------------------------------------------------|
| 1  |             |      |                                                         |            |        |                                                                      |                                  |                                                                                                                                                                                                                                                                                                                                                                                                                                                                                                                                                                                                                                                                                                                                                                                                    |
| 2  |             |      |                                                         |            |        |                                                                      |                                  |                                                                                                                                                                                                                                                                                                                                                                                                                                                                                                                                                                                                                                                                                                                                                                                                    |
| 3  | Bloching    | 2013 | South African<br>Journal of<br>Science                  | Article    | Metric | TAPSIF-<br>temporally<br>averaged<br>paper-specific<br>impact factor | Citation<br>count and IF         | Calculated from a paper's average number of citations per year<br>(including the publication year) combined with bonus cites for the<br>publishing journal's prestige—which is taken as the journal impact<br>factor from the publication year. Annual TAPSIF values of all the<br>papers by an author can be combined to measure the overall<br>scientific relevance of that author (temporally averaged author-<br>specific impact factor TAASIF).                                                                                                                                                                                                                                                                                                                                               |
| 4  |             |      |                                                         |            |        |                                                                      |                                  |                                                                                                                                                                                                                                                                                                                                                                                                                                                                                                                                                                                                                                                                                                                                                                                                    |
| 5  |             |      |                                                         |            |        |                                                                      |                                  |                                                                                                                                                                                                                                                                                                                                                                                                                                                                                                                                                                                                                                                                                                                                                                                                    |
| 6  |             |      |                                                         |            |        |                                                                      |                                  |                                                                                                                                                                                                                                                                                                                                                                                                                                                                                                                                                                                                                                                                                                                                                                                                    |
| 7  |             |      |                                                         |            |        |                                                                      |                                  |                                                                                                                                                                                                                                                                                                                                                                                                                                                                                                                                                                                                                                                                                                                                                                                                    |
| 8  |             |      |                                                         |            |        |                                                                      |                                  |                                                                                                                                                                                                                                                                                                                                                                                                                                                                                                                                                                                                                                                                                                                                                                                                    |
| 9  |             |      |                                                         |            |        |                                                                      |                                  |                                                                                                                                                                                                                                                                                                                                                                                                                                                                                                                                                                                                                                                                                                                                                                                                    |
| 10 | Bollen      | 2016 | Scientometrics                                          | Researcher | Model  | Equal<br>Allocation<br>Model                                         | Peer-review                      | A novel model in which each researcher is allocated funding and is<br>required to donate a proportion of that funding to other researchers-<br>hence uses crowd wisdom to fund scientists.                                                                                                                                                                                                                                                                                                                                                                                                                                                                                                                                                                                                         |
| 11 |             |      |                                                         |            |        |                                                                      |                                  |                                                                                                                                                                                                                                                                                                                                                                                                                                                                                                                                                                                                                                                                                                                                                                                                    |
| 12 |             |      |                                                         |            |        |                                                                      |                                  |                                                                                                                                                                                                                                                                                                                                                                                                                                                                                                                                                                                                                                                                                                                                                                                                    |
| 13 | Caminiti    | 2015 | BMC Health<br>Services<br>Research                      | Researcher | Metric | Information<br>not available                                         | Citation<br>count                | This work in progress suggests a mixture of 12 easily retrievable<br>indicators (bibliometric and citation parameters, as well as<br>“hidden” activities such as teaching, mentoring etc). The weighting<br>system was constructed considering the hypothesized effort for all<br>indicators. The chosen indicators and attributed scores still remain<br>to be validated. Modified from Wooton, Health Res Policy Syst.<br>2013;11:2; Smith, Br Med J. 2001;323(7312):528–8.; and Mezrich<br>J Am Coll Radiol. 2007;4(7):471–8.                                                                                                                                                                                                                                                                   |
| 14 |             |      |                                                         |            |        |                                                                      |                                  |                                                                                                                                                                                                                                                                                                                                                                                                                                                                                                                                                                                                                                                                                                                                                                                                    |
| 15 |             |      |                                                         |            |        |                                                                      |                                  |                                                                                                                                                                                                                                                                                                                                                                                                                                                                                                                                                                                                                                                                                                                                                                                                    |
| 16 |             |      |                                                         |            |        |                                                                      |                                  |                                                                                                                                                                                                                                                                                                                                                                                                                                                                                                                                                                                                                                                                                                                                                                                                    |
| 17 |             |      |                                                         |            |        |                                                                      |                                  |                                                                                                                                                                                                                                                                                                                                                                                                                                                                                                                                                                                                                                                                                                                                                                                                    |
| 18 |             |      |                                                         |            |        |                                                                      |                                  |                                                                                                                                                                                                                                                                                                                                                                                                                                                                                                                                                                                                                                                                                                                                                                                                    |
| 19 |             |      |                                                         |            |        |                                                                      |                                  |                                                                                                                                                                                                                                                                                                                                                                                                                                                                                                                                                                                                                                                                                                                                                                                                    |
| 20 |             |      |                                                         |            |        |                                                                      |                                  |                                                                                                                                                                                                                                                                                                                                                                                                                                                                                                                                                                                                                                                                                                                                                                                                    |
| 21 | Castelnuovo | 2010 | Clinical Practice<br>& Epidemiology<br>in Mental Health | Researcher | Metric | Single<br>Researcher<br>Impact Factor                                | IF                               | This metric takes into account publications (journal articles, books,<br>oral and poster presentations in scientific meetings); products (e.g.,<br>software, CD-ROM, videos, databases); and activities (reported<br>scientific activities such as scientific positions or positions in<br>conferences organization, participation in journal editorial boards,<br>activities on human resources education, and participation in<br>international funding projects). Minimum and maximum values are<br>assigned to each task for national and international impact.                                                                                                                                                                                                                                |
| 22 |             |      |                                                         |            |        |                                                                      |                                  |                                                                                                                                                                                                                                                                                                                                                                                                                                                                                                                                                                                                                                                                                                                                                                                                    |
| 23 |             |      |                                                         |            |        |                                                                      |                                  |                                                                                                                                                                                                                                                                                                                                                                                                                                                                                                                                                                                                                                                                                                                                                                                                    |
| 24 |             |      |                                                         |            |        |                                                                      |                                  |                                                                                                                                                                                                                                                                                                                                                                                                                                                                                                                                                                                                                                                                                                                                                                                                    |
| 25 |             |      |                                                         |            |        |                                                                      |                                  |                                                                                                                                                                                                                                                                                                                                                                                                                                                                                                                                                                                                                                                                                                                                                                                                    |
| 26 |             |      |                                                         |            |        |                                                                      |                                  |                                                                                                                                                                                                                                                                                                                                                                                                                                                                                                                                                                                                                                                                                                                                                                                                    |
| 27 |             |      |                                                         |            |        |                                                                      |                                  |                                                                                                                                                                                                                                                                                                                                                                                                                                                                                                                                                                                                                                                                                                                                                                                                    |
| 28 |             |      |                                                         |            |        |                                                                      |                                  |                                                                                                                                                                                                                                                                                                                                                                                                                                                                                                                                                                                                                                                                                                                                                                                                    |
| 29 | Claro       | 2011 | Scientometrics                                          | Researcher | Metric | The x-index                                                          | IF and<br>author<br>contribution | Aims to enable cross-disciplinary comparison and uses indicators<br>of both quality and quantity, taking into account the number of<br>publications a researcher has published, and then calculating a<br>publication score for each. This considers number of authors on the<br>paper and the journal's 5-year impact factor; it is also normalized<br>by the journals in which the author tends to publish (rather than<br>top-down classification of a field). Also uses a co-authorship share<br>coefficient. Therefore, aims to determine relative contribution to a<br>paper and normalize by field. While requiring only modest data<br>extraction and processing efforts, it is not based on individual<br>article citations but that of the journal (JIF), which can have<br>limitations. |
| 30 |             |      |                                                         |            |        |                                                                      |                                  |                                                                                                                                                                                                                                                                                                                                                                                                                                                                                                                                                                                                                                                                                                                                                                                                    |
| 31 |             |      |                                                         |            |        |                                                                      |                                  |                                                                                                                                                                                                                                                                                                                                                                                                                                                                                                                                                                                                                                                                                                                                                                                                    |
| 32 |             |      |                                                         |            |        |                                                                      |                                  |                                                                                                                                                                                                                                                                                                                                                                                                                                                                                                                                                                                                                                                                                                                                                                                                    |
| 33 |             |      |                                                         |            |        |                                                                      |                                  |                                                                                                                                                                                                                                                                                                                                                                                                                                                                                                                                                                                                                                                                                                                                                                                                    |
| 34 |             |      |                                                         |            |        |                                                                      |                                  |                                                                                                                                                                                                                                                                                                                                                                                                                                                                                                                                                                                                                                                                                                                                                                                                    |
| 35 |             |      |                                                         |            |        |                                                                      |                                  |                                                                                                                                                                                                                                                                                                                                                                                                                                                                                                                                                                                                                                                                                                                                                                                                    |
| 36 |             |      |                                                         |            |        |                                                                      |                                  |                                                                                                                                                                                                                                                                                                                                                                                                                                                                                                                                                                                                                                                                                                                                                                                                    |
| 37 |             |      |                                                         |            |        |                                                                      |                                  |                                                                                                                                                                                                                                                                                                                                                                                                                                                                                                                                                                                                                                                                                                                                                                                                    |
| 38 |             |      |                                                         |            |        |                                                                      |                                  |                                                                                                                                                                                                                                                                                                                                                                                                                                                                                                                                                                                                                                                                                                                                                                                                    |
| 39 |             |      |                                                         |            |        |                                                                      |                                  |                                                                                                                                                                                                                                                                                                                                                                                                                                                                                                                                                                                                                                                                                                                                                                                                    |
| 40 |             |      |                                                         |            |        |                                                                      |                                  |                                                                                                                                                                                                                                                                                                                                                                                                                                                                                                                                                                                                                                                                                                                                                                                                    |
| 41 |             |      |                                                         |            |        |                                                                      |                                  |                                                                                                                                                                                                                                                                                                                                                                                                                                                                                                                                                                                                                                                                                                                                                                                                    |
| 42 |             |      |                                                         |            |        |                                                                      |                                  |                                                                                                                                                                                                                                                                                                                                                                                                                                                                                                                                                                                                                                                                                                                                                                                                    |
| 43 |             |      |                                                         |            |        |                                                                      |                                  |                                                                                                                                                                                                                                                                                                                                                                                                                                                                                                                                                                                                                                                                                                                                                                                                    |
| 44 |             |      |                                                         |            |        |                                                                      |                                  |                                                                                                                                                                                                                                                                                                                                                                                                                                                                                                                                                                                                                                                                                                                                                                                                    |
| 45 |             |      |                                                         |            |        |                                                                      |                                  |                                                                                                                                                                                                                                                                                                                                                                                                                                                                                                                                                                                                                                                                                                                                                                                                    |
| 46 |             |      |                                                         |            |        |                                                                      |                                  |                                                                                                                                                                                                                                                                                                                                                                                                                                                                                                                                                                                                                                                                                                                                                                                                    |

|    |             |      |                   |            |        |              |            |                                                                                                                                                                                                                                                                                                                                                                                                                                                                                                                                                                                                                                                                                                  |
|----|-------------|------|-------------------|------------|--------|--------------|------------|--------------------------------------------------------------------------------------------------------------------------------------------------------------------------------------------------------------------------------------------------------------------------------------------------------------------------------------------------------------------------------------------------------------------------------------------------------------------------------------------------------------------------------------------------------------------------------------------------------------------------------------------------------------------------------------------------|
| 1  |             |      |                   |            |        |              |            |                                                                                                                                                                                                                                                                                                                                                                                                                                                                                                                                                                                                                                                                                                  |
| 2  |             |      |                   |            |        |              |            |                                                                                                                                                                                                                                                                                                                                                                                                                                                                                                                                                                                                                                                                                                  |
| 3  | Cordero-    | 2015 | Revista de        | Both       | Metric | RC           | IF         | The first English-language publication of this metric, it quantitatively evaluates the personal impact factor of the scientific production of isolated researchers. It also an individual form (RC $\gamma$ ) and group form (RC $\gamma$ G), and is able to assess personal impact of individual publications, 2 or a group of them. It also provides a procedure to classify research centers of different types based on the impact (FRC $\gamma$ G) made by their results amongst researchers of the same field. One of the limitations of the RC algorithm is, precisely, its dependence on said bibliographic databases, which have a strong pre-eminence of studies published in English. |
| 4  | Villafafila |      | Psiquiatría y     |            |        | Algorithm    |            |                                                                                                                                                                                                                                                                                                                                                                                                                                                                                                                                                                                                                                                                                                  |
| 5  |             |      | Salud Mental      |            |        |              |            |                                                                                                                                                                                                                                                                                                                                                                                                                                                                                                                                                                                                                                                                                                  |
| 6  |             |      | (English Edition) |            |        |              |            |                                                                                                                                                                                                                                                                                                                                                                                                                                                                                                                                                                                                                                                                                                  |
| 7  |             |      |                   |            |        |              |            |                                                                                                                                                                                                                                                                                                                                                                                                                                                                                                                                                                                                                                                                                                  |
| 8  |             |      |                   |            |        |              |            |                                                                                                                                                                                                                                                                                                                                                                                                                                                                                                                                                                                                                                                                                                  |
| 9  |             |      |                   |            |        |              |            |                                                                                                                                                                                                                                                                                                                                                                                                                                                                                                                                                                                                                                                                                                  |
| 10 |             |      |                   |            |        |              |            |                                                                                                                                                                                                                                                                                                                                                                                                                                                                                                                                                                                                                                                                                                  |
| 11 |             |      |                   |            |        |              |            |                                                                                                                                                                                                                                                                                                                                                                                                                                                                                                                                                                                                                                                                                                  |
| 12 |             |      |                   |            |        |              |            |                                                                                                                                                                                                                                                                                                                                                                                                                                                                                                                                                                                                                                                                                                  |
| 13 | Crespo      | 2015 | PLOS One          | Other      | Metric | Exchange     | Citation   | This is an average-based indicator that is used to explore differential citation rates between disciplines by using it as a normalization factor. It is not suitable for assessing individual researchers but provides insight into comparison across disciplines.                                                                                                                                                                                                                                                                                                                                                                                                                               |
| 14 |             |      |                   |            |        | Rate         | count      |                                                                                                                                                                                                                                                                                                                                                                                                                                                                                                                                                                                                                                                                                                  |
| 15 |             |      |                   |            |        |              |            |                                                                                                                                                                                                                                                                                                                                                                                                                                                                                                                                                                                                                                                                                                  |
| 16 |             |      |                   |            |        |              |            |                                                                                                                                                                                                                                                                                                                                                                                                                                                                                                                                                                                                                                                                                                  |
| 17 | De Witte    | 2010 | Scientometrics    | Researcher | Metric | RES-score -  | Data       | Authors present a methodology to aggregate multidimensional research output, using a tailored version of the non-parametric Data Envelopment Analysis model. This they claim is a more accurate representation of a research performance.                                                                                                                                                                                                                                                                                                                                                                                                                                                        |
| 18 |             |      |                   |            |        | Research     | Envelopmen |                                                                                                                                                                                                                                                                                                                                                                                                                                                                                                                                                                                                                                                                                                  |
| 19 |             |      |                   |            |        | Evaluation   | t Analysis |                                                                                                                                                                                                                                                                                                                                                                                                                                                                                                                                                                                                                                                                                                  |
| 20 |             |      |                   |            |        | Score        |            |                                                                                                                                                                                                                                                                                                                                                                                                                                                                                                                                                                                                                                                                                                  |
| 21 | Delgadillo  | 2016 | Family &          | Both       | Metric | HLA-index    | h-index    | This index, actually originally published in a book by Harzing (2011), normalizes the h-index to take into account career stage and discipline.                                                                                                                                                                                                                                                                                                                                                                                                                                                                                                                                                  |
| 22 |             |      | Consumer          |            |        |              |            |                                                                                                                                                                                                                                                                                                                                                                                                                                                                                                                                                                                                                                                                                                  |
| 23 |             |      | Sciences          |            |        |              |            |                                                                                                                                                                                                                                                                                                                                                                                                                                                                                                                                                                                                                                                                                                  |
| 24 |             |      | Research Journal  |            |        |              |            |                                                                                                                                                                                                                                                                                                                                                                                                                                                                                                                                                                                                                                                                                                  |
| 25 | Dodson      | 2012 | Biochemical and   | Researcher | Metric | SP-index     | IF         | This metric is said to quantify the scientific production of researchers, representing the product of the annual citation number by the accumulated impact factors of the journals in which the papers are published, divided by the annual number of published papers.                                                                                                                                                                                                                                                                                                                                                                                                                          |
| 26 |             |      | Biophysical       |            |        |              |            |                                                                                                                                                                                                                                                                                                                                                                                                                                                                                                                                                                                                                                                                                                  |
| 27 |             |      | Research          |            |        |              |            |                                                                                                                                                                                                                                                                                                                                                                                                                                                                                                                                                                                                                                                                                                  |
| 28 |             |      | Communications    |            |        |              |            |                                                                                                                                                                                                                                                                                                                                                                                                                                                                                                                                                                                                                                                                                                  |
| 29 |             |      |                   |            |        |              |            |                                                                                                                                                                                                                                                                                                                                                                                                                                                                                                                                                                                                                                                                                                  |
| 30 | Duffy       | 2008 | Journal of        | Both       | Metric | IRPI -       | Citation   | This metric statistically combines an individual's author-weighted publications (AWS), average times cited by other publications (MC), and years since first publication (Y) into a comprehensive score, calculated as (AWS x MC)/Y. It thereby accounts for differences in career length.                                                                                                                                                                                                                                                                                                                                                                                                       |
| 31 |             |      | Counseling        |            |        | Integrated   | count      |                                                                                                                                                                                                                                                                                                                                                                                                                                                                                                                                                                                                                                                                                                  |
| 32 |             |      | Psychology        |            |        | Research     |            |                                                                                                                                                                                                                                                                                                                                                                                                                                                                                                                                                                                                                                                                                                  |
| 33 |             |      |                   |            |        | Productivity |            |                                                                                                                                                                                                                                                                                                                                                                                                                                                                                                                                                                                                                                                                                                  |
| 34 |             |      |                   |            |        | Index        |            |                                                                                                                                                                                                                                                                                                                                                                                                                                                                                                                                                                                                                                                                                                  |
| 35 | Ebadi       | 2016 | Scientometrics    | Researcher | Model  | iSEER        | Machine    | An intelligent machine learning framework for scientific evaluation of researchers (iSEER) considers various "influencing factors of different types" (e.g., funding, collaboration pattern, performance such as quantity and impact of papers, efficiency). It can be used as a complementary tool to overcome limitations in peer-review.                                                                                                                                                                                                                                                                                                                                                      |
| 36 |             |      |                   |            |        |              | learning   |                                                                                                                                                                                                                                                                                                                                                                                                                                                                                                                                                                                                                                                                                                  |
| 37 |             |      |                   |            |        |              |            |                                                                                                                                                                                                                                                                                                                                                                                                                                                                                                                                                                                                                                                                                                  |
| 38 |             |      |                   |            |        |              |            |                                                                                                                                                                                                                                                                                                                                                                                                                                                                                                                                                                                                                                                                                                  |
| 39 |             |      |                   |            |        |              |            |                                                                                                                                                                                                                                                                                                                                                                                                                                                                                                                                                                                                                                                                                                  |
| 40 |             |      |                   |            |        |              |            |                                                                                                                                                                                                                                                                                                                                                                                                                                                                                                                                                                                                                                                                                                  |
| 41 |             |      |                   |            |        |              |            |                                                                                                                                                                                                                                                                                                                                                                                                                                                                                                                                                                                                                                                                                                  |
| 42 |             |      |                   |            |        |              |            |                                                                                                                                                                                                                                                                                                                                                                                                                                                                                                                                                                                                                                                                                                  |
| 43 |             |      |                   |            |        |              |            |                                                                                                                                                                                                                                                                                                                                                                                                                                                                                                                                                                                                                                                                                                  |
| 44 |             |      |                   |            |        |              |            |                                                                                                                                                                                                                                                                                                                                                                                                                                                                                                                                                                                                                                                                                                  |
| 45 |             |      |                   |            |        |              |            |                                                                                                                                                                                                                                                                                                                                                                                                                                                                                                                                                                                                                                                                                                  |
| 46 |             |      |                   |            |        |              |            |                                                                                                                                                                                                                                                                                                                                                                                                                                                                                                                                                                                                                                                                                                  |

|              |      |                                                   |            |        |                           |                                                           |                                                                                                                                                                                                                                                                                                                                                                                                                                                                                                                                                                                                                                                                                                                                                                                                                                                                                      |
|--------------|------|---------------------------------------------------|------------|--------|---------------------------|-----------------------------------------------------------|--------------------------------------------------------------------------------------------------------------------------------------------------------------------------------------------------------------------------------------------------------------------------------------------------------------------------------------------------------------------------------------------------------------------------------------------------------------------------------------------------------------------------------------------------------------------------------------------------------------------------------------------------------------------------------------------------------------------------------------------------------------------------------------------------------------------------------------------------------------------------------------|
| Ekpo         | 2016 | Journal of Medical Imaging and Radiation Sciences | Researcher | Metric | TotalImpact               | Author contribution, publication count and citation count | For each of the authors, the total number of publications in peer-reviewed journals (P), total number of citations (C), international collaboration metrics, number of citations per publication (CPP), h-index, and i10-index are extracted (using SciVal). This metric assessed whether authors were leading the research or coauthoring by judging their position in the list of authors for each article. Authors listed as first, second, or last (FSL) were classified as lead researchers, and those listed in-between as coauthors. Each author's total impact was then quantified by: $TotalImpact = P \times C \times FSL$ .                                                                                                                                                                                                                                               |
| Franceschini | 2012 | Scientometrics                                    | Both       | Metric | Information not available | Citation counts and h-index                               | A study specific measurement that includes the number of publications/patents and their citations and also quantifies average number of co-authors relating to publications/patents of one researcher (an indicator of tendency for co-authorship). It also uses the minimum and maximum years: the oldest publication/patent and the year relating to their latest one. This provide an indication of the temporal extension of the publishing or patenting activity of a researcher. They also use the most-cited is publication/patent of a researcher, representing the "jewel in the crown" in terms of impact/diffusion. These metrics are also scalable to teams though, where the h-spectrum is h-values to a group of researchers (including average and medium), and the h-group is the h-index of the union of publications patents associated with publications/patents. |
| Franceschini | 2012 | Scientometrics                                    | Researcher | Metric | The Success-Index         | Citation counts, NSP-index by Komulski (2011)             | This metric is based on Komulski's (2011) NSP (number of successful papers) index, with the exception that for each publication the comparison term is sometimes replaced by a more appropriate indicator of propensity to cite, determined on the basis of a representative sample of publications. While it is more complicated than the original, it is insensitive to differential propensity to cite and therefore suitable for comparisons between authors of different fields.                                                                                                                                                                                                                                                                                                                                                                                                |

1  
2  
3  
4  
5  
6  
7  
8  
9  
10  
11  
12  
13  
14  
15  
16  
17  
18  
19  
20  
21  
22  
23  
24  
25  
26  
27  
28  
29  
30  
31  
32  
33  
34  
35  
36  
37  
38  
39  
40  
41  
42  
43  
44  
45  
46

|           |      |                                                                   |            |        |                                          |                                 |                                                                                                                                                                                                                                                                                                                                                                                                                                                                                                                                                                                       |
|-----------|------|-------------------------------------------------------------------|------------|--------|------------------------------------------|---------------------------------|---------------------------------------------------------------------------------------------------------------------------------------------------------------------------------------------------------------------------------------------------------------------------------------------------------------------------------------------------------------------------------------------------------------------------------------------------------------------------------------------------------------------------------------------------------------------------------------|
| Frittelli | 2016 | Journal of the Association for Information Science and Technology | Researcher | Metric | SRM - Scientific Research Measures       | h-index and calculus            | Proposes a novel class of measures (SRM) based on calculus principles that rank a scientist's research performance by taking into account the whole citation curve of a researcher (their performance curve - number of citations of each publication, in decreasing order of citations). The performance cures can be chosen flexibly (e.g., to reflect seniority, characteristics of a field). They extend this idea by proposing Dual SRMs, which are based on theories of risk-measures. It better distinguishes researchers with the same citation curve.                        |
| Gao       | 2016 | PLOS One                                                          | Both       | Metric | PR-index - PageRank Index                | Network analysis and h-index    | This metric uses PageRank score calculation combined with h-index calculation to measure author impact. It considers publication and citation quantity but also takes a publication's citation network into consideration. This means the index will rank majority authors higher by applying PageRank based on the publication citation relationship (distinguishing higher quality citations from lower ones).                                                                                                                                                                      |
| Han       | 2013 | Institute of Strategic Studies Islamabad                          | Both       | Metric | New Evaluation Index                     | Network analysis                | The new evaluation index takes into account direct and indirect references, direct and indirect citations, and citation network.                                                                                                                                                                                                                                                                                                                                                                                                                                                      |
| Holliday  | 2010 | International Journal of General Medicine                         | Article    | Model  | Modified Delphi technique of peer-review | Peer-review                     | This paper reports using the modified Delphi process to appraise and rank research applications, with experts rating each application's scientific merit, originality, the adequacy of the study design to achieve the research goals, and whether the potential impact of the study would warrant its funding. While its ease of administration, reproducibility, and accessibility makes this a useful adjunct to the traditional processes of grant selection, it does not directly assess individual researcher's but their work.                                                 |
| Hutchins  | 2016 | PLOS Biology                                                      | Both       | Metric | iCite                                    | Citation count                  | This is used for individual articles and normalizes their citation score by adding in co-citation metrics.                                                                                                                                                                                                                                                                                                                                                                                                                                                                            |
| Ibrahim   | 2015 | New Library World                                                 | Both       | Metric | Hx                                       | h-index and author contribution | This metric is a hybridization of two indicators based on the individual h-index (weighted by the average number of co-authors for each paper) and h-index contemporary weighted by qualitative factors (conferences and journal in which a researcher participated or published). It accounts for the period of citations and number of authors on a paper, is applicable at all levels and for any discipline of research, takes conferences into consideration, and is thought to reduce unscientific practices such as integration of authors who have not genuinely contributed. |



|    |           |      |                   |            |        |                                                    |                                                 |                                                                                                                                                                                                                                                                                                                                                                                                                                                                                                                                                                                                                                                                                                                                                                                                                                                                                                                                                                                                                                                                                                                                                                                                                  |
|----|-----------|------|-------------------|------------|--------|----------------------------------------------------|-------------------------------------------------|------------------------------------------------------------------------------------------------------------------------------------------------------------------------------------------------------------------------------------------------------------------------------------------------------------------------------------------------------------------------------------------------------------------------------------------------------------------------------------------------------------------------------------------------------------------------------------------------------------------------------------------------------------------------------------------------------------------------------------------------------------------------------------------------------------------------------------------------------------------------------------------------------------------------------------------------------------------------------------------------------------------------------------------------------------------------------------------------------------------------------------------------------------------------------------------------------------------|
| 1  |           |      |                   |            |        |                                                    |                                                 |                                                                                                                                                                                                                                                                                                                                                                                                                                                                                                                                                                                                                                                                                                                                                                                                                                                                                                                                                                                                                                                                                                                                                                                                                  |
| 2  |           |      |                   |            |        |                                                    |                                                 |                                                                                                                                                                                                                                                                                                                                                                                                                                                                                                                                                                                                                                                                                                                                                                                                                                                                                                                                                                                                                                                                                                                                                                                                                  |
| 3  | Ioannidis | 2016 | PLOS Biology      | Researcher | Metric | Composite                                          | Citation count, h-index and author contribution | A study-specific composite metric based: on total number of citations in, for example, 2013 (NC), total number of citations received in 2013 to papers for which the researcher is single author (NS), total number of citations received in 2013 to papers for which the author is single or first author (NSF), total number of citations received in 2013 to papers for which the researcher is single, first, or last author (NSFL). Added to these are the h-index and modified h-index. The indicators are standardized (NC, H, Hm, NS, NSF, NSFL), giving each a standardized value from 0 to 1, where 1 is given to the researcher with the highest raw value for the respective indicator. The six standardized indicators are then summed to generate the composite index C. Well-tested and validated using factor analysis, which yielded two factors: bulk impact (NC and H), author order and co-authorship-adjusted impact (Hm, NS, NSF, and NSFL).                                                                                                                                                                                                                                               |
| 4  |           |      |                   |            |        |                                                    |                                                 |                                                                                                                                                                                                                                                                                                                                                                                                                                                                                                                                                                                                                                                                                                                                                                                                                                                                                                                                                                                                                                                                                                                                                                                                                  |
| 5  |           |      |                   |            |        |                                                    |                                                 |                                                                                                                                                                                                                                                                                                                                                                                                                                                                                                                                                                                                                                                                                                                                                                                                                                                                                                                                                                                                                                                                                                                                                                                                                  |
| 6  |           |      |                   |            |        |                                                    |                                                 |                                                                                                                                                                                                                                                                                                                                                                                                                                                                                                                                                                                                                                                                                                                                                                                                                                                                                                                                                                                                                                                                                                                                                                                                                  |
| 7  |           |      |                   |            |        |                                                    |                                                 |                                                                                                                                                                                                                                                                                                                                                                                                                                                                                                                                                                                                                                                                                                                                                                                                                                                                                                                                                                                                                                                                                                                                                                                                                  |
| 8  |           |      |                   |            |        |                                                    |                                                 |                                                                                                                                                                                                                                                                                                                                                                                                                                                                                                                                                                                                                                                                                                                                                                                                                                                                                                                                                                                                                                                                                                                                                                                                                  |
| 9  |           |      |                   |            |        |                                                    |                                                 |                                                                                                                                                                                                                                                                                                                                                                                                                                                                                                                                                                                                                                                                                                                                                                                                                                                                                                                                                                                                                                                                                                                                                                                                                  |
| 10 |           |      |                   |            |        |                                                    |                                                 |                                                                                                                                                                                                                                                                                                                                                                                                                                                                                                                                                                                                                                                                                                                                                                                                                                                                                                                                                                                                                                                                                                                                                                                                                  |
| 11 |           |      |                   |            |        |                                                    |                                                 |                                                                                                                                                                                                                                                                                                                                                                                                                                                                                                                                                                                                                                                                                                                                                                                                                                                                                                                                                                                                                                                                                                                                                                                                                  |
| 12 |           |      |                   |            |        |                                                    |                                                 |                                                                                                                                                                                                                                                                                                                                                                                                                                                                                                                                                                                                                                                                                                                                                                                                                                                                                                                                                                                                                                                                                                                                                                                                                  |
| 13 |           |      |                   |            |        |                                                    |                                                 |                                                                                                                                                                                                                                                                                                                                                                                                                                                                                                                                                                                                                                                                                                                                                                                                                                                                                                                                                                                                                                                                                                                                                                                                                  |
| 14 |           |      |                   |            |        |                                                    |                                                 |                                                                                                                                                                                                                                                                                                                                                                                                                                                                                                                                                                                                                                                                                                                                                                                                                                                                                                                                                                                                                                                                                                                                                                                                                  |
| 15 |           |      |                   |            |        |                                                    |                                                 |                                                                                                                                                                                                                                                                                                                                                                                                                                                                                                                                                                                                                                                                                                                                                                                                                                                                                                                                                                                                                                                                                                                                                                                                                  |
| 16 |           |      |                   |            |        |                                                    |                                                 |                                                                                                                                                                                                                                                                                                                                                                                                                                                                                                                                                                                                                                                                                                                                                                                                                                                                                                                                                                                                                                                                                                                                                                                                                  |
| 17 |           |      |                   |            |        |                                                    |                                                 |                                                                                                                                                                                                                                                                                                                                                                                                                                                                                                                                                                                                                                                                                                                                                                                                                                                                                                                                                                                                                                                                                                                                                                                                                  |
| 18 | Iyendar   | 2009 | Academic Medicine | Researcher | Model  | RD - Research Density and Individual Impact Factor | IF                                              | RD measures the ability to obtain grants at a point in time, while IFF reflects the quality of research. The adopted methodology compares the impact factor of an investigator's articles with those of the top journals within their own field. Each investigator identified the top three journals in his or her field. The average impact factor of these three journals was used as the benchmark for that investigator. Each faculty member was then asked to calculate his or her own individual impact factor (IIF) for two consecutive years, using 75% of their benchmark as target. This benchmark was selected after reviewing results of comparisons of investigators' IIFs with their self-defined benchmarks at several multiples (50%, 75%, and 100%). We used 75% of the self-defined benchmark as the target, because it is unlikely for every paper to be published in the best journal in the field, and yet 75% reflects the reasonably high standard of the research quality that MSSM strives for. The data were collated and the IIF of each faculty member was computed as the ratio of his or her impact factor to 75% of his or her self-defined benchmark, expressed as a percentage. |
| 19 |           |      |                   |            |        |                                                    |                                                 |                                                                                                                                                                                                                                                                                                                                                                                                                                                                                                                                                                                                                                                                                                                                                                                                                                                                                                                                                                                                                                                                                                                                                                                                                  |
| 20 |           |      |                   |            |        |                                                    |                                                 |                                                                                                                                                                                                                                                                                                                                                                                                                                                                                                                                                                                                                                                                                                                                                                                                                                                                                                                                                                                                                                                                                                                                                                                                                  |
| 21 |           |      |                   |            |        |                                                    |                                                 |                                                                                                                                                                                                                                                                                                                                                                                                                                                                                                                                                                                                                                                                                                                                                                                                                                                                                                                                                                                                                                                                                                                                                                                                                  |
| 22 |           |      |                   |            |        |                                                    |                                                 |                                                                                                                                                                                                                                                                                                                                                                                                                                                                                                                                                                                                                                                                                                                                                                                                                                                                                                                                                                                                                                                                                                                                                                                                                  |
| 23 |           |      |                   |            |        |                                                    |                                                 |                                                                                                                                                                                                                                                                                                                                                                                                                                                                                                                                                                                                                                                                                                                                                                                                                                                                                                                                                                                                                                                                                                                                                                                                                  |
| 24 |           |      |                   |            |        |                                                    |                                                 |                                                                                                                                                                                                                                                                                                                                                                                                                                                                                                                                                                                                                                                                                                                                                                                                                                                                                                                                                                                                                                                                                                                                                                                                                  |
| 25 |           |      |                   |            |        |                                                    |                                                 |                                                                                                                                                                                                                                                                                                                                                                                                                                                                                                                                                                                                                                                                                                                                                                                                                                                                                                                                                                                                                                                                                                                                                                                                                  |
| 26 |           |      |                   |            |        |                                                    |                                                 |                                                                                                                                                                                                                                                                                                                                                                                                                                                                                                                                                                                                                                                                                                                                                                                                                                                                                                                                                                                                                                                                                                                                                                                                                  |
| 27 |           |      |                   |            |        |                                                    |                                                 |                                                                                                                                                                                                                                                                                                                                                                                                                                                                                                                                                                                                                                                                                                                                                                                                                                                                                                                                                                                                                                                                                                                                                                                                                  |
| 28 |           |      |                   |            |        |                                                    |                                                 |                                                                                                                                                                                                                                                                                                                                                                                                                                                                                                                                                                                                                                                                                                                                                                                                                                                                                                                                                                                                                                                                                                                                                                                                                  |
| 29 |           |      |                   |            |        |                                                    |                                                 |                                                                                                                                                                                                                                                                                                                                                                                                                                                                                                                                                                                                                                                                                                                                                                                                                                                                                                                                                                                                                                                                                                                                                                                                                  |
| 30 |           |      |                   |            |        |                                                    |                                                 |                                                                                                                                                                                                                                                                                                                                                                                                                                                                                                                                                                                                                                                                                                                                                                                                                                                                                                                                                                                                                                                                                                                                                                                                                  |
| 31 |           |      |                   |            |        |                                                    |                                                 |                                                                                                                                                                                                                                                                                                                                                                                                                                                                                                                                                                                                                                                                                                                                                                                                                                                                                                                                                                                                                                                                                                                                                                                                                  |
| 32 |           |      |                   |            |        |                                                    |                                                 |                                                                                                                                                                                                                                                                                                                                                                                                                                                                                                                                                                                                                                                                                                                                                                                                                                                                                                                                                                                                                                                                                                                                                                                                                  |
| 33 |           |      |                   |            |        |                                                    |                                                 |                                                                                                                                                                                                                                                                                                                                                                                                                                                                                                                                                                                                                                                                                                                                                                                                                                                                                                                                                                                                                                                                                                                                                                                                                  |
| 34 |           |      |                   |            |        |                                                    |                                                 |                                                                                                                                                                                                                                                                                                                                                                                                                                                                                                                                                                                                                                                                                                                                                                                                                                                                                                                                                                                                                                                                                                                                                                                                                  |
| 35 | Jeang     | 2008 | Retrovirology     | Researcher | Metric | Mentoring Index                                    | h-index                                         | Argues that good mentoring should be a significant consideration of one's contribution to science. It focuses on using the h-index of previous trainees in evaluating established researchers. It is thought this index could encourage the development of long-lasting mentoring relationships.                                                                                                                                                                                                                                                                                                                                                                                                                                                                                                                                                                                                                                                                                                                                                                                                                                                                                                                 |
| 36 |           |      |                   |            |        |                                                    |                                                 |                                                                                                                                                                                                                                                                                                                                                                                                                                                                                                                                                                                                                                                                                                                                                                                                                                                                                                                                                                                                                                                                                                                                                                                                                  |
| 37 |           |      |                   |            |        |                                                    |                                                 |                                                                                                                                                                                                                                                                                                                                                                                                                                                                                                                                                                                                                                                                                                                                                                                                                                                                                                                                                                                                                                                                                                                                                                                                                  |
| 38 |           |      |                   |            |        |                                                    |                                                 |                                                                                                                                                                                                                                                                                                                                                                                                                                                                                                                                                                                                                                                                                                                                                                                                                                                                                                                                                                                                                                                                                                                                                                                                                  |
| 39 |           |      |                   |            |        |                                                    |                                                 |                                                                                                                                                                                                                                                                                                                                                                                                                                                                                                                                                                                                                                                                                                                                                                                                                                                                                                                                                                                                                                                                                                                                                                                                                  |
| 40 |           |      |                   |            |        |                                                    |                                                 |                                                                                                                                                                                                                                                                                                                                                                                                                                                                                                                                                                                                                                                                                                                                                                                                                                                                                                                                                                                                                                                                                                                                                                                                                  |
| 41 |           |      |                   |            |        |                                                    |                                                 |                                                                                                                                                                                                                                                                                                                                                                                                                                                                                                                                                                                                                                                                                                                                                                                                                                                                                                                                                                                                                                                                                                                                                                                                                  |
| 42 |           |      |                   |            |        |                                                    |                                                 |                                                                                                                                                                                                                                                                                                                                                                                                                                                                                                                                                                                                                                                                                                                                                                                                                                                                                                                                                                                                                                                                                                                                                                                                                  |
| 43 |           |      |                   |            |        |                                                    |                                                 |                                                                                                                                                                                                                                                                                                                                                                                                                                                                                                                                                                                                                                                                                                                                                                                                                                                                                                                                                                                                                                                                                                                                                                                                                  |
| 44 |           |      |                   |            |        |                                                    |                                                 |                                                                                                                                                                                                                                                                                                                                                                                                                                                                                                                                                                                                                                                                                                                                                                                                                                                                                                                                                                                                                                                                                                                                                                                                                  |
| 45 |           |      |                   |            |        |                                                    |                                                 |                                                                                                                                                                                                                                                                                                                                                                                                                                                                                                                                                                                                                                                                                                                                                                                                                                                                                                                                                                                                                                                                                                                                                                                                                  |
| 46 |           |      |                   |            |        |                                                    |                                                 |                                                                                                                                                                                                                                                                                                                                                                                                                                                                                                                                                                                                                                                                                                                                                                                                                                                                                                                                                                                                                                                                                                                                                                                                                  |

1  
2  
3  
4  
5  
6  
7  
8  
9  
10  
11  
12  
13  
14  
15  
16  
17  
18  
19  
20  
21  
22  
23  
24  
25  
26  
27  
28  
29  
30  
31  
32  
33  
34  
35  
36  
37  
38  
39  
40  
41  
42  
43  
44  
45  
46

|          |      |                                                                  |         |        |                           |                              |                                                                                                                                                                                                                                                                                                                                                                                                                                                                                                                                                                                                                                                                                                                                                                                                                                                                                                                                                        |
|----------|------|------------------------------------------------------------------|---------|--------|---------------------------|------------------------------|--------------------------------------------------------------------------------------------------------------------------------------------------------------------------------------------------------------------------------------------------------------------------------------------------------------------------------------------------------------------------------------------------------------------------------------------------------------------------------------------------------------------------------------------------------------------------------------------------------------------------------------------------------------------------------------------------------------------------------------------------------------------------------------------------------------------------------------------------------------------------------------------------------------------------------------------------------|
| Krapivin | 2009 | Complex Sciences                                                 | Both    | Metric | PaperRank and PR-hirsch   | Network analysis and h-index | Based on PageRank, which has been very successful in ranking web pages, essentially considering the reputation of the web page referring to a given page, and the outgoing link density (i.e., pages P linked by pages L where L has few outgoing links are considered more important than pages P cited by pages L where L has many outgoing links). PaperRank (PR) applies page rank to papers by considering papers as web pages and citations as links, and hence trying to consider not only citations when ranking papers, but also taking into account the rank of the citing paper and the density of outgoing citations from the citing paper. The PR-Hirsch is a modification of the H-index based on the same PageRank approach. PR and PR-Hirsch are complementary to citation-based metrics, capable of capturing information present in the whole citation network, namely the “weight” (the reputation or authority) of a citing paper. |
| Kreines  | 2016 | Journal of Computer and Systems Sciences International           | Article | Model  | Information not available | Citation count and IF        | Proposes a model for assessing quality in the content of individual articles using computational analysis with bibliometric and scientometric data (number of citations and the journal's IF).                                                                                                                                                                                                                                                                                                                                                                                                                                                                                                                                                                                                                                                                                                                                                         |
| Lando    | 2014 | PLOS One                                                         | Article | Metric | L-index                   | h-index                      | This index considers the most elite papers and rewards papers of high impact and based on the form of the citation distribution. It is thought to outperform the h-index in terms of accuracy and sensitivity to the form of the citation distribution, while being strongly correlated with other important h-type indices. It rewards the more regular and reliable researchers.                                                                                                                                                                                                                                                                                                                                                                                                                                                                                                                                                                     |
| Liang    | 2015 | IEEE International Conference on Smart City/SocialCom/SustainCom | Both    | Model  | Temporal tracking model   |                              | The temporal research evolution model takes into account individual output, researcher profile and experiences                                                                                                                                                                                                                                                                                                                                                                                                                                                                                                                                                                                                                                                                                                                                                                                                                                         |

|            |      |                                    |            |        |                                    |                |                                                                                                                                                                                                                                                                                                                                                                                                                                                                                                                                                                                                                                                                                                                                                                                         |
|------------|------|------------------------------------|------------|--------|------------------------------------|----------------|-----------------------------------------------------------------------------------------------------------------------------------------------------------------------------------------------------------------------------------------------------------------------------------------------------------------------------------------------------------------------------------------------------------------------------------------------------------------------------------------------------------------------------------------------------------------------------------------------------------------------------------------------------------------------------------------------------------------------------------------------------------------------------------------|
| Lippi      | 2017 | Annals of Translational Medicine   | Researcher | Metric | SIF-Scientist Impact Factor        | IF             | This metric is calculated as all citations of articles published in the two years following the publication year of the articles, divided by the overall number of articles published in that year. For example, the SIF for the year 2017 would be obtained by dividing all citations in the years 2015–2016 to articles published in the year 2014, divided by the overall number of articles published in the year 2014. The total number of recent citations is normalized according to the number of recently published articles, limiting the bias emerging from publishing a large number of scarcely cited articles; and the output measure reliably reflects the recent scientific impact of the scientist, so complementing an overall career indicator, such as the h-index. |
| Markpin    | 2008 | Scientometrics                     | Other      | Metric | ACIF - Article-Count Impact Factor | IF             | This is proposed as a journal-level metric that is calculated as the total number of articles cited in the current year divided by the number of articles published in 1st and 2nd year. Note that is based on the number of articles that were cited, rather than the times cited of the cited articles. However, it could be used for individual researchers.                                                                                                                                                                                                                                                                                                                                                                                                                         |
| Matsas     | 2012 | Brazilian Journal of Physics       | Both       | Metric | NIF - Normalized Impact Factor     | IF             | Introduces a normalized impact factor that looks at the researchers influence on their scientific community by assessing the degree to which they have been influenced by their community. Looks each of an author's publications, the number of co-authors, references in the article and citations it has received. From the way it is calculated: "in a closed community of identical individuals (i.e., who publish, reference and are cited by each other at the same rate), all members have NIF = 1." Leaders in a field are then those with a NIF greater than or equal to 1 i.e., they influence their peers at least as much as they are influenced by them.                                                                                                                  |
| Maunder    | 2007 | La Revue Canadienne de Psychiatrie | Article    | Metric | Citation Ratio                     | Citation count | This metric is designed to overcome systematic differences amongst niche fields by comparing the impact of a particular paper to the average impact of a paper in its journal. A ratio above 1 indicates relatively greater success.                                                                                                                                                                                                                                                                                                                                                                                                                                                                                                                                                    |
| Mazlounian | 2011 | PLOS One                           | Article    | Metric | Boost Factor                       | Citation count | This metric calculates when a particular research gains scientific authority, that is, they publish some groundbreaking work that then leads to an upswing in citations of their earlier papers. It is able to model the trend of the "rich get richer", a cascade of citations and is too improve the "signal-to-noise" ratio in citation rates by detecting sudden changes in citations.                                                                                                                                                                                                                                                                                                                                                                                              |

1  
2  
3  
4  
5  
6  
7  
8  
9  
10  
11  
12  
13  
14  
15  
16  
17  
18  
19  
20  
21  
22  
23  
24  
25  
26  
27  
28  
29  
30  
31  
32  
33  
34  
35  
36  
37  
38  
39  
40  
41  
42  
43  
44  
45  
46

|                     |      |                                            |            |        |                                               |                                         |                                                                                                                                                                                                                                                                                                                                                                                                                                                                                                                                                                |
|---------------------|------|--------------------------------------------|------------|--------|-----------------------------------------------|-----------------------------------------|----------------------------------------------------------------------------------------------------------------------------------------------------------------------------------------------------------------------------------------------------------------------------------------------------------------------------------------------------------------------------------------------------------------------------------------------------------------------------------------------------------------------------------------------------------------|
| Milone              | 2016 | American Journal of Orthopedics            | Article    | Metric | Information not available                     | Publication count                       | A study specific measurement simply calculated by taking the mean of first and last authored publications.                                                                                                                                                                                                                                                                                                                                                                                                                                                     |
| Mooji               | 2014 | Scientometrics                             | Both       | Model  | Information not available                     | Peer-review, altmetrics, citation count | This paper proposes a comprehensive and new framework for assessing research quality assessment which utilizes intrinsic (i.e., the internal quality of a publication) and extrinsic indicators (i.e., citation counts, web-based influence). It uses peer-review ratings for the former and bibliometric and altmetric data at the individual article and author levels for the latter. One limit includes that the assessment of extrinsic factors is still biased in terms of multi-author papers. This framework builds in a quality check on peer-review. |
| Moreira             | 2015 | PLOS One                                   | Researcher | Metric | $\mu$                                         | Information not available               | Suggests accumulated citations from an author's aggregated publications follow an asymptotic number, and then use a lognormal model. Creates $\mu$ as a scale of expected citability of a researcher's publication. It is able to be used at all career stages and indicates more of quality over quantity.                                                                                                                                                                                                                                                    |
| Morel               | 2009 | PLOS Neglected Tropic Diseases             | Researcher | Metric | Information not available                     | Network Analysis                        | Co-citation networks generated using SNA of publications, to identify groups and individuals with high collaboration rates.                                                                                                                                                                                                                                                                                                                                                                                                                                    |
| Niederkroten thaler | 2011 | BMC Public Health                          | Article    | Model  | Information not available                     | Information not available               | A tool designed to measure the societal impact of research publications. It consists of three quantitative dimensions: (1) the aim of a publication, (2) the efforts of the authors to translate their research results, and, if translation was accomplished, (3) (a) the size of the area where translation was accomplished (regional, national or international), (b) its status (preliminary versus permanent) and (c) the target group of the translation (individuals, subgroup of population, total population).                                       |
| Nosek               | 2010 | Personality and Social Psychology Bulletin | Researcher | Metric | Ics-Individual researcher career-stage impact | Citation count                          | Produces career-stage metric of scientific impact based on citation counts. Its development was based on extensive data collection to produce a regression of expected growth of impact over time. It, therefore, reflects the distance from one's expected impact at a given career stage.                                                                                                                                                                                                                                                                    |
| Pagani              | 2015 | Scientometrics                             | Article    | Metric | Methodi Ordinatio                             | IF                                      | Based on IF, number of citations and year of publication in a normalized, weighted mathematical equation. It is a potential way to define scientific relevance.                                                                                                                                                                                                                                                                                                                                                                                                |

|   |          |      |                                                                                 |            |        |                                                  |                |                                                                                                                                                                                                                                                                                                                                                                                                                                                     |
|---|----------|------|---------------------------------------------------------------------------------|------------|--------|--------------------------------------------------|----------------|-----------------------------------------------------------------------------------------------------------------------------------------------------------------------------------------------------------------------------------------------------------------------------------------------------------------------------------------------------------------------------------------------------------------------------------------------------|
| 1 | Pan      | 2014 | Science Reports                                                                 | Researcher | Metric | Author Impact Factor (AIF)                       |                | Defined as the AIF of an author A in year t is the average number of citations given by papers published in year t to papers published by A in a period of $\Delta t$ years before year t. Uses a time window of years for calculation.                                                                                                                                                                                                             |
| 2 | Patel    | 2013 | Journal of the Royal Society of Medicine                                        | Researcher | Model  | sRM - statistical Regression Model               | Citation count | Used to estimate the number of high visibility (based on citation count) publications of each researcher.                                                                                                                                                                                                                                                                                                                                           |
| 3 | Pepe     | 2012 | PLOS One                                                                        | Researcher | Metric | TORI - Total Research Impact                     | Citation count | Includes non-self-citations accrued by the researcher, number of authors on cited paper, and number of bibliographic references to generate the cumulative output of a scholar by summing the impact of every external citation accrued in his/her career. This removes biases associated with citation counts.                                                                                                                                     |
| 4 | Petersen | 2013 | Journal of Informetrics                                                         | Researcher | Metric | Z                                                | h-index        | Z is aimed at correcting the h-index's penalty (which in some cases neglects 75% of an author's body of work) by including the total number of citations for their work in the metric.                                                                                                                                                                                                                                                              |
| 5 | Pöder    | 2017 | Trames-Journal of the Humanities and Social Sciences                            | Researcher | Metric | (Current or predicted) impact rate of researcher | Citation count | Based on the citations per year squared, this metric provides a means of assessing acceleration/impact and is based on time series data. This is more sensitive to productivity overtime and can go down unlike the h-index.                                                                                                                                                                                                                        |
| 6 | Prathap  | 2014 | Scientometrics                                                                  | Researcher | Metric | Z-index                                          | h-index        | Purporting to include quality, quantity and consistency, it accounts for the high-end of research performance, while compensating for the skewness of citation-publication distributions.                                                                                                                                                                                                                                                           |
| 7 | Radicchi | 2008 | Proceedings of the National Academy of Sciences of the United States of America | Article    | Metric | Relative Indicator - cf                          | Citation count | The relative indicator is used to deal with the fact that different fields have different citation patterns and allows for comparisons of the success of articles in different fields.                                                                                                                                                                                                                                                              |
| 8 | Ribas    | 2015 | Proceedings of the 24th International Conference on World Wide Web              | Both       | Metric | P-score                                          | Citation count | It associates a reputation with publication venues based on the publication patterns of reference groups, composed by researchers, in a given area of knowledge. Although the choice of reference groups can be made by using available citation data, the P-score metric itself does not depend on citation data. It uses just publication records of researchers and research groups; that is, the papers and the venues where they published in. |

|           |      |                                              |            |        |                                                        |                              |                                                                                                                                                                                                                                                                                       |
|-----------|------|----------------------------------------------|------------|--------|--------------------------------------------------------|------------------------------|---------------------------------------------------------------------------------------------------------------------------------------------------------------------------------------------------------------------------------------------------------------------------------------|
| Ricker    | 2009 | Interciencia                                 | Researcher | Model  | Rule-based peer-review                                 | Peer-review                  | Computer generated peer-review, which is positive as researchers get peer-review feedback. Can also measure evaluators select certain criteria of interest, important journals of interest based on field.                                                                            |
| Ruane     | 2009 | Scientometrics                               | Both       | Metric | h1-index                                               | h-index                      | A measure of supervision quality, it gives the supervisor h1 index calculated by the h-indexes of their PhD students.                                                                                                                                                                 |
| Sahoo     | 2017 | Omega                                        | Researcher | Model  | Composite indicator                                    | h-index, IF, citation counts | Calculated based on the relative weight of the six indicators of journal tier, total citations, author h-index, number of papers, impact factor, and journal h-index.                                                                                                                 |
| Saxena    | 2013 | Journal of Pharmacology Pharmacotherapeutics | Researcher | Metric | ORPI - Original Research Publication Index             | Citation count               | Indicates originality, productivity, and visibility, by including total number of original articles, citations, accounting for self-citations, and the total number of citable articles (i.e., including reviews and case reports). Also accounts for author order and career length. |
| Sibbald   | 2015 | Journal of the Medical Library Association   | Both       | Model  | Modified approach to citation analysis                 | Citation count               | Includes grey literature in the citation analysis search process and involves quantitative and qualitative methods of analysis to gain a better understanding of how a research paper was used. However, this is more expensive and time consuming than traditional metrics.          |
| Sittig    | 2015 | MEDINFO 2015: eHealth-enabled Health         | Researcher | Model  | The Biomedical Informatics Researchers ranking website | Information not available    | This new system was developed to overcome previous scientific productivity ranking strategies. However, it is limited to biomedical informatics.                                                                                                                                      |
| Sorenson  | 2011 | Journal of Parkinson's Disease               | Both       | Metric | "Broad impact" citations                               | Citation count               | Citations from those outside the field are used as a measure of broader impact.                                                                                                                                                                                                       |
| Suria     | 2017 | The Electronic Library                       | Researcher | Metric | Research Impact Factor                                 | IF                           | Allows a measure of scientific influence of a researcher in their relative scientific area.                                                                                                                                                                                           |
| Szymanski | 2012 | Information Sciences                         | Both       | Metric | CENTs - sScientific currENcy Tokens and the I-index    | Citation count and h-index   | An accumulation of "cents" based on the number of non-self-citations. This is also the premise behind the i-index, whereby papers are ranked according to CENTs rather than just all citations.                                                                                       |

|             |      |                                    |            |        |                                           |                                        |                                                                                                                                                                                                                                                                                      |
|-------------|------|------------------------------------|------------|--------|-------------------------------------------|----------------------------------------|--------------------------------------------------------------------------------------------------------------------------------------------------------------------------------------------------------------------------------------------------------------------------------------|
| Tan         | 2016 | The Annals of Applied Statistics   | Article    | Model  | Information not available                 | Citation count                         | Proposes to use two established models in the creation of a third. The proposed model provides a structural understanding of the field variation in citation behavior and a measure of visibility for individual articles adjusted for citation probabilities within/between topics. |
| Vieira      | 2011 | Scientometrics                     | Researcher | Metric | hnf-index                                 | h-index                                | Considers the different cultures of citation of each field and the number of authors per publication, and hence can be used to measure researcher performance.                                                                                                                       |
| Wagner      | 2012 | Research Evaluation                | Researcher | Metric | I3 - Integrated impact indicator          | Citation count                         | A framework for integrating citations and non-parametric statistics of percentiles, which allow highly cited papers to be weighted more than less-cited ones.                                                                                                                        |
| Waltman     | 2013 |                                    | Article    | Metric | HCP – Highly cited publications index     | Citation count                         | A simple model in which the number of citations of a publication depends not only on the scientific impact of the publication but also on other ‘random’ factors. Does not account for productivity.                                                                                 |
| Wang        | 2013 | Science                            | Article    | Model  | Mechanistic model for citation dynamics   | Citation count                         | Authors demonstrate a predictable course for citations of single articles over time, purporting, therefore, to create more reliable predictive index of individual impact.                                                                                                           |
| Williamson  | 2008 | Family Medicine                    | Researcher | Metric | Information not available                 | Too broad to classify                  | Quantifies activities within three domains: teaching, service and research and scholarly activity. A time intensive- process that is suitable for promotion within institutions, but not grant funding or more macro-scale assessments.                                              |
| Wootton     | 2013 | Health Research Policy and Systems | Researcher | Metric | R - Simple indicator of researcher output |                                        | Formula is $R=g+p+s$ and comprises grant income (g), publications (peer-reviewed and weighted by JIF; p) and numbers of PhD students supervised (no credit for submission after the due date of submission; s).                                                                      |
| Yaminfirooz | 2015 | The Electronic Library             | Both       | Metric | mh-index                                  | h-index                                | Use to identify differences in the impact of authors with the same h-index, and differences between the outputs of influential researchers working in a certain field and the ones publishing only a few papers during a year, can track the impact of highly cited papers.          |
| Yang        | 2013 | Journal of Informetrics            | Researcher | Metric | A-index - Axiomatic approach              | Citation count and author contribution | Allows for evaluation of individual researcher in the team context (i.e., co-authorship networks).                                                                                                                                                                                   |

1  
2  
3  
4  
5  
6  
7  
8  
9  
10  
11  
12  
13  
14  
15  
16  
17  
18  
19  
20  
21  
22  
23  
24  
25  
26  
27  
28  
29  
30  
31  
32  
33  
34  
35  
36  
37  
38  
39  
40  
41  
42  
43  
44  
45  
46

|            |      |                        |            |        |                                          |                           |                                                                                                                                                                                                                           |
|------------|------|------------------------|------------|--------|------------------------------------------|---------------------------|---------------------------------------------------------------------------------------------------------------------------------------------------------------------------------------------------------------------------|
| Zhang      | 2012 | Scientometrics         | Both       | Model  | Scientometric age pyramid                | Information not available | Accounts for the different ages of academics, different fields, co-authorship patterns and analysis of journals. The pyramid represents the number of publications on one side and number of citations on the other side. |
| Zhou       | 2012 | New Journal of Physics | Both       | Metric | AP Algorithm                             | Citation count            | Considers the prestige of the scientists citing the article but assumes equal contribution of each author to the paper.                                                                                                   |
| Zhu        | 2015 | arXiv                  | Researcher | Metric | The hip index - Influence-primed h-index | h-index                   | The hip-index weights citations by how many times a reference is mentioned, which is thought to make it a better indicator of researcher performance.                                                                     |
| Zhuo       | 2008 | Omega                  | Other      | Metric | Z factor                                 | IF                        | Uses both the number of publications and the impact factors of the journals in which they were published.                                                                                                                 |
| Zou        | 2016 | Scientometrics         | Researcher | Metric | S-ZP index                               | IF                        | Metric based on journal impact factor of publications and author order.                                                                                                                                                   |
| Zyczkowski | 2010 | Scientometrics         | Both       | Metric | C - Citation matrix                      | h-index                   | A scheme based on weighing the citation based on previous scientific achievements and authors citing the paper.                                                                                                           |



# Reporting checklist for systematic review and meta-analysis.

Based on the PRISMA guidelines.

## Instructions to authors

Complete this checklist by entering the page numbers from your manuscript where readers will find each of the items listed below.

Your article may not currently address all the items on the checklist. Please modify your text to include the missing information. If you are certain that an item does not apply, please write "n/a" and provide a short explanation.

Upload your completed checklist as an extra file when you submit to a journal.

In your methods section, say that you used the PRISMA reporting guidelines, and cite them as:

Moher D, Liberati A, Tetzlaff J, Altman DG, The PRISMA Group. Preferred Reporting Items for Systematic Reviews and Meta-Analyses: The PRISMA Statement

|                    | Reporting Item                                                                                                                                                                                             | Page Number |
|--------------------|------------------------------------------------------------------------------------------------------------------------------------------------------------------------------------------------------------|-------------|
|                    | <a href="#">#1</a> Identify the report as a systematic review, meta-analysis, or both.                                                                                                                     | Title page  |
| Structured summary | <a href="#">#2</a> Provide a structured summary including, as applicable: background; objectives; data sources; study eligibility criteria, participants, and interventions; study appraisal and synthesis | 2-3         |

|    |                      |                                                                          |                 |
|----|----------------------|--------------------------------------------------------------------------|-----------------|
| 1  |                      | methods; results; limitations; conclusions and                           |                 |
| 2  |                      | implications of key findings; systematic review                          |                 |
| 3  |                      | registration number                                                      |                 |
| 4  |                      |                                                                          |                 |
| 5  |                      |                                                                          |                 |
| 6  |                      |                                                                          |                 |
| 7  |                      |                                                                          |                 |
| 8  | Rationale            | <a href="#">#3</a> Describe the rationale for the review in the context  | 4-5             |
| 9  |                      | of what is already known.                                                |                 |
| 10 |                      |                                                                          |                 |
| 11 |                      |                                                                          |                 |
| 12 |                      |                                                                          |                 |
| 13 | Objectives           | <a href="#">#4</a> Provide an explicit statement of questions being      | 5-7             |
| 14 |                      | addressed with reference to participants,                                |                 |
| 15 |                      | interventions, comparisons, outcomes, and study                          |                 |
| 16 |                      | design (PICOS).                                                          |                 |
| 17 |                      |                                                                          |                 |
| 18 |                      |                                                                          |                 |
| 19 |                      |                                                                          |                 |
| 20 |                      |                                                                          |                 |
| 21 |                      |                                                                          |                 |
| 22 |                      |                                                                          |                 |
| 23 | Protocol and         | <a href="#">#5</a> Indicate if a review protocol exists, if and where it | Review protocol |
| 24 | registration         | can be accessed (e.g., Web address) and, if                              | exists but is   |
| 25 |                      | available, provide registration information including                    | unpublished     |
| 26 |                      | the registration number.                                                 |                 |
| 27 |                      |                                                                          |                 |
| 28 |                      |                                                                          |                 |
| 29 |                      |                                                                          |                 |
| 30 |                      |                                                                          |                 |
| 31 |                      |                                                                          |                 |
| 32 |                      |                                                                          |                 |
| 33 | Eligibility criteria | <a href="#">#6</a> Specify study characteristics (e.g., PICOS, length    | 5-7             |
| 34 |                      | of follow-up) and report characteristics (e.g., years                    |                 |
| 35 |                      | considered, language, publication status) used as                        |                 |
| 36 |                      | criteria for eligibility, giving rational                                |                 |
| 37 |                      |                                                                          |                 |
| 38 |                      |                                                                          |                 |
| 39 |                      |                                                                          |                 |
| 40 |                      |                                                                          |                 |
| 41 |                      |                                                                          |                 |
| 42 |                      |                                                                          |                 |
| 43 | Information          | <a href="#">#7</a> Describe all information sources in the search        | 5-7             |
| 44 | sources              | (e.g., databases with dates of coverage, contact                         |                 |
| 45 |                      | with study authors to identify additional studies)                       |                 |
| 46 |                      | and date last searched.                                                  |                 |
| 47 |                      |                                                                          |                 |
| 48 |                      |                                                                          |                 |
| 49 |                      |                                                                          |                 |
| 50 |                      |                                                                          |                 |
| 51 |                      |                                                                          |                 |
| 52 |                      |                                                                          |                 |
| 53 | Search               | <a href="#">#8</a> Present full electronic search strategy for at least  | 4-7, Appendix 1 |
| 54 |                      | one database, including any limits used, such that                       |                 |
| 55 |                      | it could be repeated.                                                    |                 |
| 56 |                      |                                                                          |                 |
| 57 |                      |                                                                          |                 |
| 58 |                      |                                                                          |                 |
| 59 |                      |                                                                          |                 |
| 60 |                      |                                                                          |                 |

|    |                 |                     |                                                          |                     |
|----|-----------------|---------------------|----------------------------------------------------------|---------------------|
| 1  | Study selection | <a href="#">#9</a>  | State the process for selecting studies (i.e., for       | 4-7                 |
| 2  |                 |                     | screening, for determining eligibility, for inclusion in |                     |
| 3  |                 |                     | the systematic review, and, if applicable, for           |                     |
| 4  |                 |                     | inclusion in the meta-analysis).                         |                     |
| 5  |                 |                     |                                                          |                     |
| 6  |                 |                     |                                                          |                     |
| 7  |                 |                     |                                                          |                     |
| 8  |                 |                     |                                                          |                     |
| 9  |                 |                     |                                                          |                     |
| 10 |                 |                     |                                                          |                     |
| 11 | Data collection | <a href="#">#10</a> | Describe the method of data extraction from              | 5-7 and Appendix 2  |
| 12 | process         |                     | reports (e.g., piloted forms, independently by two       |                     |
| 13 |                 |                     | reviewers) and any processes for obtaining and           |                     |
| 14 |                 |                     | confirming data from investigators.                      |                     |
| 15 |                 |                     |                                                          |                     |
| 16 |                 |                     |                                                          |                     |
| 17 |                 |                     |                                                          |                     |
| 18 |                 |                     |                                                          |                     |
| 19 |                 |                     |                                                          |                     |
| 20 |                 |                     |                                                          |                     |
| 21 | Data items      | <a href="#">#11</a> | List and define all variables for which data were        | Page 6-7 and        |
| 22 |                 |                     | sought (e.g., PICOS, funding sources), and any           | Appendix 2          |
| 23 |                 |                     | assumptions and simplifications made.                    |                     |
| 24 |                 |                     |                                                          |                     |
| 25 |                 |                     |                                                          |                     |
| 26 |                 |                     |                                                          |                     |
| 27 |                 |                     |                                                          |                     |
| 28 |                 |                     |                                                          |                     |
| 29 | Risk of bias in | <a href="#">#12</a> | Describe methods used for assessing risk of bias         | 5-7                 |
| 30 | individual      |                     | in individual studies (including specification of        |                     |
| 31 | studies         |                     | whether this was done at the study or outcome            |                     |
| 32 |                 |                     | level, or both), and how this information is to be       |                     |
| 33 |                 |                     | used in any data synthesis.                              |                     |
| 34 |                 |                     |                                                          |                     |
| 35 |                 |                     |                                                          |                     |
| 36 |                 |                     |                                                          |                     |
| 37 |                 |                     |                                                          |                     |
| 38 |                 |                     |                                                          |                     |
| 39 |                 |                     |                                                          |                     |
| 40 |                 |                     |                                                          |                     |
| 41 | Summary         | <a href="#">#13</a> | State the principal summary measures (e.g., risk         | The primary outcome |
| 42 | measures        |                     | ratio, difference in means).                             | measure was         |
| 43 |                 |                     |                                                          | methods to assess   |
| 44 |                 |                     |                                                          | research            |
| 45 |                 |                     |                                                          | achievement.        |
| 46 |                 |                     |                                                          |                     |
| 47 |                 |                     |                                                          |                     |
| 48 |                 |                     |                                                          |                     |
| 49 |                 |                     |                                                          |                     |
| 50 |                 |                     |                                                          |                     |
| 51 |                 |                     |                                                          |                     |
| 52 |                 |                     |                                                          |                     |
| 53 | Planned         | <a href="#">#14</a> | Describe the methods of handling data and                | 6-7                 |
| 54 | methods of      |                     | combining results of studies, if done, including         |                     |
| 55 | analysis        |                     |                                                          |                     |
| 56 |                 |                     |                                                          |                     |
| 57 |                 |                     |                                                          |                     |
| 58 |                 |                     |                                                          |                     |
| 59 |                 |                     |                                                          |                     |
| 60 |                 |                     |                                                          |                     |

|    |                 |                                                                        |      |
|----|-----------------|------------------------------------------------------------------------|------|
| 1  |                 | measures of consistency (e.g., I <sup>2</sup> ) for each meta-         |      |
| 2  |                 |                                                                        |      |
| 3  |                 | analysis.                                                              |      |
| 4  |                 |                                                                        |      |
| 5  |                 |                                                                        |      |
| 6  | Risk of bias    | <a href="#">#15</a> Specify any assessment of risk of bias that may    | 5-6  |
| 7  |                 |                                                                        |      |
| 8  | across studies  | affect the cumulative evidence (e.g., publication                      |      |
| 9  |                 |                                                                        |      |
| 10 |                 | bias, selective reporting within studies).                             |      |
| 11 |                 |                                                                        |      |
| 12 |                 |                                                                        |      |
| 13 | Additional      | <a href="#">#16</a> Describe methods of additional analyses (e.g.,     | 8-12 |
| 14 |                 |                                                                        |      |
| 15 | analyses        | sensitivity or subgroup analyses, meta-regression),                    |      |
| 16 |                 |                                                                        |      |
| 17 |                 | if done, indicating which were pre-specified.                          |      |
| 18 |                 |                                                                        |      |
| 19 |                 |                                                                        |      |
| 20 |                 |                                                                        |      |
| 21 | Study selection | <a href="#">#17</a> Give numbers of studies screened, assessed for     | 7-8  |
| 22 |                 |                                                                        |      |
| 23 |                 | eligibility, and included in the review, with reasons                  |      |
| 24 |                 |                                                                        |      |
| 25 |                 | for exclusions at each stage, ideally with a flow                      |      |
| 26 |                 |                                                                        |      |
| 27 |                 | diagram.                                                               |      |
| 28 |                 |                                                                        |      |
| 29 |                 |                                                                        |      |
| 30 |                 |                                                                        |      |
| 31 | Study           | <a href="#">#18</a> For each study, present characteristics for which  | 8-12 |
| 32 |                 |                                                                        |      |
| 33 | characteristics | data were extracted (e.g., study size, PICOS,                          |      |
| 34 |                 |                                                                        |      |
| 35 |                 | follow-up period) and provide the citation.                            |      |
| 36 |                 |                                                                        |      |
| 37 |                 |                                                                        |      |
| 38 |                 |                                                                        |      |
| 39 | Risk of bias    | <a href="#">#19</a> Present data on risk of bias of each study and, if | 6    |
| 40 |                 |                                                                        |      |
| 41 | within studies  | available, any outcome-level assessment (see                           |      |
| 42 |                 |                                                                        |      |
| 43 |                 | Item 12).                                                              |      |
| 44 |                 |                                                                        |      |
| 45 |                 |                                                                        |      |
| 46 | Results of      | <a href="#">#20</a> For all outcomes considered (benefits and harms),  | 7-11 |
| 47 |                 |                                                                        |      |
| 48 | individual      | present, for each study: (a) simple summary data                       |      |
| 49 |                 |                                                                        |      |
| 50 | studies         | for each intervention group and (b) effect                             |      |
| 51 |                 |                                                                        |      |
| 52 |                 | estimates and confidence intervals, ideally with a                     |      |
| 53 |                 |                                                                        |      |
| 54 |                 | forest plot.                                                           |      |
| 55 |                 |                                                                        |      |
| 56 |                 |                                                                        |      |
| 57 |                 |                                                                        |      |
| 58 |                 |                                                                        |      |
| 59 |                 |                                                                        |      |
| 60 |                 |                                                                        |      |

|                                                                      |                             |                     |                                                                                                                                                                                      |                                |
|----------------------------------------------------------------------|-----------------------------|---------------------|--------------------------------------------------------------------------------------------------------------------------------------------------------------------------------------|--------------------------------|
| 1<br>2<br>3<br>4<br>5<br>6<br>7                                      | Synthesis of results        | <a href="#">#21</a> | Present the main results of the review. If meta-analyses are done, include for each, confidence intervals and measures of consistency.                                               | Not applicable to this review. |
| 8<br>9<br>10<br>11<br>12<br>13                                       | Risk of bias across studies | <a href="#">#22</a> | Present results of any assessment of risk of bias across studies (see Item 15).                                                                                                      | 4-5                            |
| 14<br>15<br>16<br>17<br>18<br>19<br>20<br>21                         | Additional analysis         | <a href="#">#23</a> | Give results of additional analyses, if done (e.g., sensitivity or subgroup analyses, meta-regression [see Item 16]).                                                                | Not applicable to this review. |
| 22<br>23<br>24<br>25<br>26<br>27<br>28<br>29<br>30<br>31             | Summary of Evidence         | <a href="#">#24</a> | Summarize the main findings, including the strength of evidence for each main outcome; consider their relevance to key groups (e.g., health care providers, users, and policy makers | 13-17                          |
| 32<br>33<br>34<br>35<br>36<br>37<br>38<br>39<br>40<br>41             | Limitations                 | <a href="#">#25</a> | Discuss limitations at study and outcome level (e.g., risk of bias), and at review level (e.g., incomplete retrieval of identified research, reporting bias).                        | 15-16                          |
| 42<br>43<br>44<br>45<br>46<br>47<br>48                               | Conclusions                 | <a href="#">#26</a> | Provide a general interpretation of the results in the context of other evidence, and implications for future research.                                                              | 16-17                          |
| 49<br>50<br>51<br>52<br>53<br>54<br>55<br>56<br>57<br>58<br>59<br>60 | Funding                     | <a href="#">#27</a> | Describe sources of funding or other support (e.g., supply of data) for the systematic review; role of funders for the systematic review.                                            | 18                             |

1 The PRISMA checklist is distributed under the terms of the Creative Commons Attribution License  
2  
3 CC-BY. This checklist can be completed online using <https://www.goodreports.org/>, a tool made by  
4  
5 the [EQUATOR Network](#) in collaboration with [Penelope.ai](#)  
6  
7  
8  
9  
10  
11  
12  
13  
14  
15  
16  
17  
18  
19  
20  
21  
22  
23  
24  
25  
26  
27  
28  
29  
30  
31  
32  
33  
34  
35  
36  
37  
38  
39  
40  
41  
42  
43  
44  
45  
46  
47  
48  
49  
50  
51  
52  
53  
54  
55  
56  
57  
58  
59  
60

For peer review only
