# Supplementary material for: Comprehensive Researcher Achievement Model (CRAM): a framework for measuring researcher achievement, impact and influence derived from a systematic literature review of metrics and models
Source: PubMed Central journal article supplement — BMJ Open. 2019 Mar 30;9(3):e025320. doi: 10.1136/bmjopen-2018-025320 (PMC6475357; doi:10.1136/bmjopen-2018-025320), 2019-03-30
Supplement: bmjopen-2018-025320supp001.pdf [file bmjopen-2018-025320supp001.pdf]

## Appendix 1: Full Search Strategy

|                                                                 |                                                                                                                                                                                                                                                                                                                                                                                                                                                                                    |                     |
|-----------------------------------------------------------------|------------------------------------------------------------------------------------------------------------------------------------------------------------------------------------------------------------------------------------------------------------------------------------------------------------------------------------------------------------------------------------------------------------------------------------------------------------------------------------|---------------------|
| <b>Name of database</b>                                         | Web of Science Core Collection, BIOSIS Citation Index, Medline                                                                                                                                                                                                                                                                                                                                                                                                                     |                     |
| <b>Platform</b>                                                 | Web of Science [Clarivate Analytics]                                                                                                                                                                                                                                                                                                                                                                                                                                               |                     |
| <b>Database coverage</b>                                        | 2007-2017                                                                                                                                                                                                                                                                                                                                                                                                                                                                          |                     |
| <b>Date exported to Reference Management Software (EndNote)</b> | 19 <sup>th</sup> October 2017                                                                                                                                                                                                                                                                                                                                                                                                                                                      |                     |
| <b>Search strategy</b>                                          | Model OR framework OR assess* OR evaluat*OR<br>*metric*OR measur* OR criteri*OR citation*OR<br>unconscious bias OR rank*                                                                                                                                                                                                                                                                                                                                                           | Results: 13,282,151 |
|                                                                 | AND                                                                                                                                                                                                                                                                                                                                                                                                                                                                                |                     |
|                                                                 | researcher excellence OR track record OR researcher<br>funding OR researcher perform* OR relative to opportunity<br>OR researcher potential OR research* career pathway OR<br>academic career pathway OR funding system OR funding<br>body OR researcher impact OR scientific* productivity OR<br>academic productivity OR top researcher OR researcher<br>ranking OR grant application OR researcher output OR<br>h*index OR i*index OR impact factor OR individual<br>researcher | Results: 11,616     |
|                                                                 | Combined sets [Auto select language based on search<br>language]                                                                                                                                                                                                                                                                                                                                                                                                                   | Results: 7,530      |
