# Supplementary material for: Comprehensive Researcher Achievement Model (CRAM): a framework for measuring researcher achievement, impact and influence derived from a systematic literature review of metrics and models
Source: PubMed Central journal article supplement — BMJ Open. 2019 Mar 30;9(3):e025320. doi: 10.1136/bmjopen-2018-025320 (PMC6475357; doi:10.1136/bmjopen-2018-025320), 2019-03-30
Supplement: bmjopen-2018-025320supp002.pdf [file bmjopen-2018-025320supp002.pdf]

**Appendix 2: Summary table of included articles and the metrics or models they discuss**

| Publication Details |      |                                             |         | Metric or Model Assessing an Individual's Research Achievement |               |         |     |       |             |     |
|---------------------|------|---------------------------------------------|---------|----------------------------------------------------------------|---------------|---------|-----|-------|-------------|-----|
| First author        | Year | Journal name                                | Format^ | Peer-review                                                    | Simple Counts | h-index | JIF | Other | Alt-metrics | New |
| Abramo              | 2016 | Scientometrics                              | ED      |                                                                |               |         |     | Y     |             |     |
| Agarwal             | 2016 | Asian Journal of Andrology                  | ED      |                                                                | Y             | Y       | Y   | Y     | Y           |     |
| Ahmad               | 2013 | Anesthesia and Analgesia                    | EM      |                                                                | Y             |         |     |       |             |     |
| Aixela              | 2015 | Perspectives: Studies in Translatology      | ED      | Y                                                              |               | Y       | Y   | Y     |             |     |
| Akl                 | 2012 | Canadian Medical Association Journal        | EM      | Y                                                              |               |         |     |       |             |     |
| Albion              | 2012 | Australian Educational Researcher           | EM      |                                                                |               | Y       | Y   | Y     |             |     |
| Alguliyev           | 2016 | Journal of Scientometric Research           | EM      |                                                                |               |         | Y   | Y     |             |     |
| Allen               | 2010 | ScienceAsia                                 | ED      |                                                                |               | Y       | Y   |       |             |     |
| Anderson            | 2008 | Scientometrics                              | ED      |                                                                |               | Y       |     |       |             | Y   |
| Anderson            | 2017 | Applied Economics                           | EM      | Y                                                              |               | Y       | Y   |       |             |     |
| Anfossi             | 2015 | International Journal of Dermatology        | EM      |                                                                |               |         | Y   |       |             |     |
| Antunes             | 2015 | Revista do Colegio Brasileiro de Cirurgioes | EM      | Y                                                              |               | Y       |     |       |             |     |
| Aoun                | 2013 | World Neurosurgery                          | RE      | Y                                                              |               | Y       | Y   |       |             |     |
| Aragon              | 2013 | Nature Scientific Reports                   | EM      |                                                                |               |         |     |       |             | Y   |
| Armado              | 2017 | Transinformação                             | EM      |                                                                |               | Y       |     | Y     |             |     |
| Assimakis           | 2010 | Scientometrics                              | EM      |                                                                |               |         |     |       |             | Y   |
| Azer                | 2016 | Education Forum                             |         |                                                                |               | Y       | Y   | Y     |             |     |
| Babineau            | 2014 | The Western Journal of Emergency Medicine   | EM      |                                                                |               | Y       |     |       |             |     |

|                   |      |                                                   |    |   |   |   |   |   |   |
|-------------------|------|---------------------------------------------------|----|---|---|---|---|---|---|
| Baccini           | 2014 | Scientometrics                                    | EM |   |   | Y | Y | Y |   |
| Badar             | 2016 | Aslib Journal of Information Management           | EM | Y |   |   | Y |   |   |
| Bai               | 2016 | PLOS One                                          | EM |   | Y | Y | Y | Y | Y |
| Bala              | 2013 | Journal of Clinical Epidemiology                  | EM |   |   |   | Y |   |   |
| Balaban           | 2013 | Journal of General Physiology                     | ED | Y |   |   |   |   |   |
| Balandin          | 2009 | Augmentative and Alternative Communication        | ED |   |   | Y | Y |   |   |
| Barczynski        | 2009 | Journal of Human Kinetics                         | ED |   |   |   | Y | Y |   |
| Bastian           | 2017 | Journal of Bone and Joint Surgery-American Volume | EM |   |   | Y |   |   |   |
| Baum              | 2011 | SAGE                                              | EM | Y |   |   | Y |   |   |
| Beck              | 2017 | Research Evaluation                               | EM | Y |   |   |   |   |   |
| Beirlant          | 2010 | Scandinavian Journal of Statistics                | EM |   |   | Y |   |   |   |
| Belikov           | 2015 | f1000 Research                                    | EM |   |   |   | Y |   | Y |
| Bellini           | 2012 | The Lancet                                        | ED |   | Y | Y | Y |   |   |
| Belter            | 2015 | Journal of The Medical Library Association        | ED | Y |   | Y |   |   |   |
| Benchimol-Barbosa | 2011 | Arquivos Brasileiros de Cardiologia               | ED |   |   |   |   | Y |   |
| Benway            | 2009 | Urology                                           | ED | Y | Y | Y |   |   |   |
| Bertuzzi          | 2013 | Molecular Biology of the Cell                     | ED |   |   |   |   | Y |   |
| Bharathi          | 2013 | PLOS One                                          | ED |   |   |   | Y |   |   |
| Bini              | 2008 | Electronic Transactions on Numerical Analysis     | EM |   |   |   |   |   | Y |
| Birks             | 2014 | Health Services Research & Policy                 | EM | Y |   | Y |   |   |   |
| Biswal            | 2013 | PLOS One                                          | ED |   |   |   | Y |   | Y |
| Bloch             | 2016 | Research Evaluation                               | EM |   |   |   |   |   | Y |

|                 |      |                                          |    |   |   |   |   |   |   |   |
|-----------------|------|------------------------------------------|----|---|---|---|---|---|---|---|
| Bloching        | 2013 | South African Journal of Science         | EM | Y |   |   |   |   |   | Y |
| Bollen          | 2016 | Scientometrics                           | ED | Y |   |   |   |   |   | Y |
| Bolli           | 2014 | Circulation Research                     | ED |   |   |   |   |   |   |   |
| Bornmann        | 2009 | EMBO Reports                             | ED |   |   |   | Y | Y |   |   |
| Bornmann        | 2015 | Journal of Informetrics                  | EM | Y | Y | Y | Y | Y |   |   |
| Bornmann        | 2016 | EMBO Reports                             | ED |   |   | Y | Y | Y |   |   |
| Bornmann        | 2014 | Scientometrics                           | EM |   | Y | Y |   |   |   |   |
| Bornmann        | 2008 | Research Evaluation                      | EM | Y | Y | Y | Y | Y | Y |   |
| Bornmann        | 2017 | Journal of Informetrics                  | EM |   |   | Y | Y | Y | Y |   |
| Bornmann        | 2017 | Journal of Korean Medical Science        | ED |   |   |   |   | Y | Y |   |
| Bould           | 2011 | British Journal of Anaesthesia           | EM |   |   |   | Y |   |   |   |
| Bradshaw        | 2016 | PLOS One                                 | EM |   |   | Y | Y | Y | Y |   |
| Brown           | 2011 | American Journal of Occupational Therapy | ED |   |   |   | Y | Y | Y |   |
| Buela-Casal     | 2012 | Scientometrics                           | EM |   |   |   |   | Y |   |   |
| Buela-Casal     | 2010 | Revista de Psicodidáctica                | ED |   |   | Y | Y | Y | Y | Y |
| Butler          | 2017 | Clinical Spine Surgery                   | ED |   |   |   |   |   |   | Y |
| Cabazas Clavijo | 2013 | Medicina Intensiva (English edition)     | RE |   |   | Y | Y | Y |   |   |
| Cagan           | 2013 | Disease Models & Mechanisms              | ED |   |   |   |   | Y |   |   |
| Callaway        | 2016 | Nature                                   | ED |   |   |   |   | Y |   |   |
| Calver          | 2013 | Grumpy Scientists                        | ED |   |   | Y | Y | Y | Y |   |
| Calver          | 2015 | Australian Universities Review           | ED |   |   |   |   |   | Y |   |
| Caminiti        | 2015 | BMC Health Services Research             | RE |   |   |   |   |   |   | Y |

|                     |      |                                                                        |    |   |   |   |   |   |     |
|---------------------|------|------------------------------------------------------------------------|----|---|---|---|---|---|-----|
| Cantin              | 2015 | International Journal of Morphology                                    | EM |   |   | Y |   |   |     |
| Carpenter           | 2014 | Academic Emergency Medicine                                            | ED |   |   | Y | Y | Y | Y   |
| Carpenter           | 2014 | Information Service and Use                                            | ED |   |   |   | Y |   | Y   |
| Castelnuovo         | 2010 | Clinical Practice & Epidemiology in Mental Health                      | RE |   |   | Y | Y |   | Y Y |
| Castillo            | 2010 | American Journal of Neuroradiology                                     | ED |   |   | Y |   | Y |     |
| Chiari              | 2016 | Nurse Education Today                                                  | EM | Y |   |   |   |   |     |
| Choi                | 2014 | Journal of Radiation Oncology                                          | EM | Y |   | Y |   | Y | Y   |
| Choi                | 2009 | International Journal of Radiation Oncology, Biology, Physics          | EM |   | Y | Y |   |   |     |
| Chopra              | 2016 | Aesthetic Surgery Journal                                              | EM |   |   | Y |   |   |     |
| Choudhri            | 2015 | Radiographics                                                          | ED |   | Y | Y | Y |   |     |
| Chowdhury           | 2015 | PLOS One                                                               | EM | Y |   | Y |   |   |     |
| Christopher         | 2015 | Journal of Veterinary Cardiology                                       | ED |   |   |   |   | Y |     |
| Chung               | 2012 | Scientometrics                                                         | EM |   |   |   |   |   | Y   |
| Ciriminna           | 2013 | Chemistry Central Journal                                              | ED |   | Y | Y | Y | Y |     |
| Claro               | 2011 | Scientometrics                                                         | EM |   |   |   |   |   |     |
| Cleary              | 2010 | International Journal of Mental Health Nursing                         | ED |   |   | Y |   |   |     |
| Cone                | 2013 | Academic Emergency Medicine                                            | ED |   |   | Y |   |   |     |
| Cone                | 2012 | Academic Emergency Medicine                                            | ED |   |   |   |   | Y |     |
| Cordero-Villafafila | 2015 | Revista de Psiquiatría y Salud Mental (English Edition)                | ED |   |   | Y | Y | Y | Y   |
| Costas              | 2011 | Scientometrics                                                         | EM |   | Y |   |   | Y |     |
| Costas              | 2009 | Journal of the American Society for Information Science and Technology | EM |   | Y |   | Y |   |     |

|                                |      |                                                                        |    |   |   |   |   |   |   |
|--------------------------------|------|------------------------------------------------------------------------|----|---|---|---|---|---|---|
| Crespo                         | 2013 | PLOS One                                                               | EM |   | Y | Y |   |   | Y |
| Cress                          | 2014 | Aesthetic Surgery Journal                                              | ED |   |   |   | Y |   | Y |
| Crotty                         |      | European Heart Journal                                                 | ED |   |   | Y |   |   |   |
| Culley                         | 2014 | Anesthesia & Analgesia                                                 | EM |   | Y | Y |   | Y |   |
| Cynical Geographers Collective | 2011 | Antipode                                                               | ED |   | Y |   | Y |   |   |
| Czarnecki                      | 2013 | Bulletin of the Polish Academy of Sciences                             | EM |   |   | Y |   |   |   |
| da Silva                       | 2017 | Scientometrics                                                         | ED |   |   |   | Y | Y | Y |
| Danell                         | 2011 | Journal of the American Society for Information Science and Technology | EM |   | Y |   |   |   |   |
| Danielson                      | 2013 | American Journal of Pharmaceutical Education                           | EM |   | Y | Y |   | Y |   |
| de Granda-Orive                | 2014 | Archivos de Bronconeumología                                           | ED |   | Y |   |   | Y |   |
| De Gregori                     | 2016 | Journal of Pain Research                                               | EM |   |   |   |   |   | Y |
| De la Flor-Martínez M          | 2017 | Medicina Oral Patologia Oral Y Cirugia Bucal                           | EM | Y |   | Y |   |   |   |
| De Marchi                      | 2016 | Scientometrics                                                         | EM |   |   |   | Y |   |   |
| De Witte                       | 2010 | Scientometrics                                                         | EM | Y |   |   |   |   | Y |
| Delgadillo                     | 2016 | Family & Consumer Sciences research journal                            | RE |   |   | Y |   |   | Y |
| DeLuca                         | 2013 | Academic Emergency Medicine                                            | EM | Y |   | Y |   |   |   |
| Devos                          | 2011 | Clinics and Research in Hepatology and Gastroenterology                | ED |   |   | Y |   |   |   |
| Diamandis                      | 2017 | BMC Medicine                                                           | ED |   |   |   | Y |   |   |
| DiBartola                      | 2017 | Journal of Veterinary Internal Medicine                                | ED |   |   | Y | Y | Y |   |
| Diem                           | 2013 | Research in Higher Education                                           | EM |   |   |   | Y |   |   |
| Ding                           | 2011 | Information Processing and Management                                  | EM |   | Y | Y | Y | Y | Y |

|             |      |                                                                        |    |   |   |   |   |   |   |
|-------------|------|------------------------------------------------------------------------|----|---|---|---|---|---|---|
| Ding        | 2011 | Journal of the American Society for Information Science and Technology | EM |   |   | Y | Y |   | Y |
| Diniz-Filho | 2016 | Journal of Informetrics                                                | EM | Y | Y |   | Y |   |   |
| Dinsmore    | 2014 | PLOS Biology                                                           | ED |   |   |   |   |   | Y |
| Dodson      | 2012 | Biochemical and Biophysical Research Communications                    | EM | Y |   | Y | Y |   | Y |
| Donato      | 2014 | Revista Portuguesa De Pneumologia                                      | ED |   |   |   | Y |   |   |
| Doyle       | 2015 | Molecular Psychiatry                                                   | EM | Y |   |   |   |   |   |
| Duffy       | 2011 | Scientometrics                                                         | EM |   | Y | Y |   | Y |   |
| Duffy       | 2008 | Journal of Counseling Psychology                                       | EM |   | Y | Y |   | Y | Y |
| Durieux     | 2010 | Radiology                                                              | RE |   |   | Y | Y | Y | Y |
| Ebadi       | 2016 | Scientometrics                                                         | EM |   |   |   |   | Y | Y |
| Eblen       | 2016 | PLOS One                                                               | EM | Y |   |   |   |   |   |
| Efron       | 2011 | Clinical and Experimental Optometry                                    | EM |   | Y | Y |   | Y |   |
| Ekpo        | 2016 | Journal of Medical Imaging and Radiation Sciences                      | EM |   |   | Y | Y | Y | Y |
| El Emam     | 2012 | Journal of Medical Internet Research                                   | EM |   | Y | Y | Y |   |   |
| Ellson      | 2009 | Journal of Business Research                                           | ED |   |   |   |   |   |   |
| Eloy        | 2014 | Otolaryngology–Head and Neck Surgery                                   | EM | Y |   | Y | Y | Y |   |
| Eloy        | 2013 | Laryngoscope                                                           | EM |   |   | Y |   |   |   |
| Esposito    | 2010 | European Journal of Oral Implantology.                                 | ED |   |   | Y |   |   |   |
| Eyre-Walker | 2013 | PLOS Biology                                                           | EM | Y | Y |   | Y |   |   |
| Eysenbach   | 2011 | Journal of Medical Internet Research                                   | EM |   | Y | Y | Y |   | Y |
| Fabry       | 2017 | GMS Journal for Medical Education                                      | ED | Y |   |   | Y |   | Y |

|               |      |                                                                          |    |   |   |   |   |   |   |
|---------------|------|--------------------------------------------------------------------------|----|---|---|---|---|---|---|
| Fang          | 2016 | eLIFE                                                                    | EM | Y |   |   |   |   |   |
| Fazel         | 2017 | Evidence-based Mental Health                                             | EM | Y |   |   |   | Y | Y |
| Fedderke      | 2015 | Research Policy                                                          | EM |   | Y | Y |   |   |   |
| Feethman      | 2015 | Veterinary Record                                                        | ED |   |   |   | Y |   |   |
| Ferrer-Sapena | 2016 | Research Evaluation                                                      | ED |   | Y |   | Y | Y | Y |
| Filler        | 2014 | Academic Medicine                                                        | EM |   |   |   |   | Y |   |
| Finch         | 2010 | Bioessays                                                                | ED |   |   | Y | Y | Y |   |
| Flaatten      | 2016 | Acta Anaesthesiologica Scandinavica                                      | ED |   |   | Y | Y |   |   |
| Franceschet   | 2010 | Journal of Informetrics                                                  | EM |   |   |   | Y | Y |   |
| Franceschini  | 2012 | Scientometrics                                                           | EM |   |   |   |   | Y | Y |
| Franceschini  | 2012 | Scientometrics                                                           | EM |   |   | Y | Y | Y | Y |
| Franceschini  | 2012 | Scientometrics                                                           | EM |   | Y | Y |   | Y |   |
| Frittelli     | 2016 | Journal of the Association for Information Science and Technology        | EM |   |   | Y | Y |   | Y |
| Frixione      | 2016 | PLOS One                                                                 | EM | Y |   |   |   |   | Y |
| Fujita        | 2017 | IEEE 41st Annual Computer Software and Applications Conference (COMPSAC) | EM | Y | Y |   |   |   |   |
| Gambadauro    | 2007 | European Journal of Obstetrics & Gynecology and Reproductive Biology     | ED |   |   |   | Y |   |   |
| Gao           | 2016 | PLOS One                                                                 | ED |   |   | Y |   |   | Y |
| Garcia-Perez  | 2015 | Scientometrics                                                           | EM |   | Y |   |   | Y |   |
| Garcia-Perez  | 2009 | Spanish Journal of Psychology                                            | EM |   | Y | Y |   |   |   |
| Garner        | 2017 | Journal of Neurointerventional Surgery                                   | RE |   | Y | Y |   |   |   |

|                    |      |                                                       |    |   |   |   |   |   |
|--------------------|------|-------------------------------------------------------|----|---|---|---|---|---|
| Gasparyan          | 2017 | Journal of Korean Medical Science                     | ED |   |   | Y | Y | Y |
| Gast               | 2014 | Plastic and Reconstructive Surgery                    | EM |   | Y | Y |   |   |
| Gast               | 2014 | Plastic & Reconstructive Surgery                      | EM |   |   | Y |   | Y |
| Gaughan            | 2008 | Research Evaluation                                   | EM |   |   |   |   | Y |
| Gefen              | 2011 | Journal of Biomechanics                               | LE | Y |   | Y |   |   |
| Giminez-Toledo     | 2016 | Scientometrics                                        | EM |   |   |   |   | Y |
| Glänzel            | 2014 | Transinformação                                       | ED |   |   | Y |   | Y |
| Good               | 2015 | Research Evaluation                                   | ED |   |   |   |   | Y |
| Gorraiz            | 2010 | LIBER Quarterly                                       | ED |   | Y |   | Y | Y |
| Gracza             | 2008 | Library Collections Acquisitions & Technical Services | ED |   |   | Y | Y |   |
| Grisso             | 2017 | Journal of Women's Health                             | EM | Y |   |   |   |   |
| Grzybowski         | 2017 | Clinics in Dermatology                                | ED |   |   |   | Y |   |
| Gumpenberger       | 2016 | Scientometrics.                                       | ED | Y |   | Y | Y | Y |
| Haddad             | 2014 | The Bone and Joint Journal                            | ED |   |   |   | Y |   |
| Haddow             | 2015 | Research Evaluation                                   | EM |   |   |   |   |   |
| Haeffner-Cavaillon | 2009 | Archivum Immunologiae et Therapiae Experimentalis     | ED | Y |   | Y | Y | Y |
| Halbach            | 2011 | Annals of Anatomy                                     | EM |   | Y | Y |   | Y |
| Hall               | 2015 | Tourism Management                                    | ED |   |   |   | Y |   |
| Halvorson          | 2016 | Implications for Training in the Health Professions   | EM |   | Y | Y |   |   |
| Hamidreza          | 2013 | Acta Informatica Medica                               | EM |   |   | Y |   |   |
| Hammarfelt         | 2017 | Research Evaluation                                   | EM | Y |   | Y | Y |   |
| Han                | 2013 | ISSI                                                  | EM | Y |   |   | Y | Y |



|           |      |                                                                                         |    |   |   |   |   |   |   |
|-----------|------|-----------------------------------------------------------------------------------------|----|---|---|---|---|---|---|
| Han       | 2010 | Journal of Animal and Veterinary Advances                                               | EM |   |   | Y | Y |   |   |
| Haslam    | 2009 | Research Evaluation                                                                     | EM |   | Y | Y | Y |   |   |
| Haslam    | 2010 | European Journal of Social Psychology                                                   | EM |   |   | Y | Y | Y | Y |
| Healy     | 2011 | Breast Cancer Research and Treatment                                                    | EM |   |   | Y |   |   |   |
| Heinzl    | 2012 | AIP Conference Proceedings                                                              | ED |   |   | Y | Y | Y |   |
| Henrekson | 2011 | The Manchester School                                                                   | EM |   | Y | Y | Y | Y |   |
| Herteliu  | 2017 | Publications                                                                            | EM |   |   | Y |   |   |   |
| Hew       | 2017 | Telematics and Informatics                                                              | EM |   | Y | Y | Y |   |   |
| Hicks     | 2015 | Nature                                                                                  | ED |   |   | Y | Y |   |   |
| Hicks     | 2015 | Nature                                                                                  | ED |   |   | Y | Y |   |   |
| Hoffman   | 2014 | 47th Hawaii International Conference on System Sciences                                 | O  |   |   | Y | Y |   | Y |
| Holliday  | 2010 | International Journal of General Medicine                                               | EM | Y |   |   | Y |   | Y |
| Houser    | 2017 | Leukos                                                                                  | ED |   |   | Y | Y |   |   |
| Hughes    | 2015 | International Journal of Radiation Oncology Biology Physics<br>NB Conference supplement | EM |   | Y | Y |   |   |   |
| Hunt      | 2011 | Acta Neuropsychiatrica                                                                  | ED |   |   | Y | Y |   |   |
| Hutchins  | 2016 | PLOS Biology                                                                            | EM |   |   |   |   |   | Y |
| Hyman     | 2014 | Molecular Biology of the Cell                                                           | ED |   |   |   |   |   |   |
| Ibrahim   | 2015 | New Library World                                                                       | EM | Y | Y | Y |   |   | Y |
| Ioannidis | 2016 | PLOS Biology                                                                            | EM |   | Y | Y |   |   | Y |
| Ion       | 2017 | Chirurgia                                                                               | RE |   |   | Y | Y | Y |   |
| Iyendar   | 2009 | Academic Medicine                                                                       | EM |   |   |   | Y |   | Y |

|         |      |                                                                                           |    |   |   |   |     |
|---------|------|-------------------------------------------------------------------------------------------|----|---|---|---|-----|
| Jackson | 2015 | Medical Journal of Australia                                                              | ED | Y |   |   |     |
| Jackson | 2011 | PLOS One                                                                                  | EM |   |   |   | Y   |
| Jacob   | 2007 | Scientometrics                                                                            | EM |   | Y |   | Y   |
| Jacso   | 2010 | Online Information Review                                                                 | EM |   |   |   | Y Y |
| Jacso   | 2008 | Online Information Review                                                                 | ED |   |   | Y |     |
| Jalil   | 2013 | IEEE International Conference on Teaching, Assessment and Learning for Engineering (TALE) | EM |   |   |   | Y   |
| Jamjoom | 2015 | Neurosciences                                                                             | EM |   |   | Y |     |
| Jamjoom | 2016 | World Neurosurgery                                                                        | EM |   |   | Y |     |
| Jan     | 2016 | Journal of Scientometric Research                                                         | EM |   |   | Y | Y   |
| Javey   | 2012 | American Chemical Society                                                                 | ED |   |   | Y | Y   |
| Jeang   | 2008 | Retrovirology                                                                             | ED |   |   | Y | Y   |
| Jokic   | 2009 | Biochemia Medica                                                                          | ED |   | Y | Y | Y   |
| Joshi   | 2014 | The Journal of Contemporary Dental Practice                                               | ED |   |   | Y | Y   |
| Joykson | 2015 | f1000 Research                                                                            | EM |   |   |   |     |
| Kaatz   | 2015 | Academic Medicine                                                                         | EM | Y |   |   |     |
| Kaatz   | 2016 | Academic Medicine                                                                         | EM | Y |   |   |     |
| Kali    | 2015 | Indian Journal of Pharmacology                                                            | ED |   | Y |   | Y   |
| Kalra   | 2013 | Journal of Neurosurgery-Pediatrics                                                        | EM |   |   | Y | Y   |
| Kaltman | 2014 | Circulation Research                                                                      | EM |   | Y |   |     |
| Kapoor  | 2013 | The Annals of Medical and Health Sciences Research                                        | ED |   |   |   | Y   |
| Kellner | 2008 | Anais Da Academia Brasileira De Ciencias                                                  | EM |   |   | Y |     |

|             |      |                                                                        |    |   |   |   |   |     |
|-------------|------|------------------------------------------------------------------------|----|---|---|---|---|-----|
| Khan        | 2013 | World Neurology                                                        | EM |   |   | Y |   |     |
| Knudson     | 2015 | Quest                                                                  | EM |   | Y |   |   |     |
| Kosmulski   | 2012 | Research Evaluation                                                    | ED |   | Y |   | Y |     |
| Krapivin    | 2009 | Complex Sciences                                                       | EM |   | Y | Y |   | Y Y |
| Kreiman     | 2011 | Frontiers in Computational Neuroscience                                | ED | Y | Y |   | Y | Y   |
| Kreines     | 2016 | Journal of Computer and Systems Sciences International                 | EM |   |   |   |   | Y   |
| Kshetry     | 2013 | World Neurosurgery                                                     | ED |   |   | Y | Y |     |
| Kulasagareh | 2010 | European Archives of Oto-Rhino-Laryngology                             | EM |   |   | Y |   |     |
| Kulczycki   | 2017 | Journal of Informetrics                                                | ED |   |   | Y |   |     |
| Kumar       | 2009 | Iete Technical Review                                                  | ED |   | Y | Y | Y |     |
| Kuo         | 2017 | Computers in Human Behavior                                            | EM |   |   |   |   | Y   |
| Lando       | 2014 | PLOS One                                                               | EM |   | Y | Y |   | Y   |
| Lariviere   | 2010 | Journal of the American Society for Information Science and Technology | EM |   |   |   | Y |     |
| Lariviere   | 2016 | PLOS One                                                               | EM |   | Y |   |   |     |
| Lariviere   | 2011 | Journal of Informetrics                                                | EM |   |   |   |   | Y   |
| Lauer       | 2015 | The New England Journal of Medicine                                    | ED | Y |   |   |   |     |
| Law         | 2013 | Asia Pacific Journal of Tourism Research                               | EM | Y | Y |   | Y |     |
| Lee         | 2009 | Journal of neurosurgery                                                | EM |   |   | Y |   |     |
| Leff        | 2009 | International Journal of COPD                                          | ED |   |   |   | Y |     |
| Leydesdorff | 2016 | Scientometrics                                                         | ED |   |   | Y | Y | Y   |
| Li          | 2015 | Science                                                                | EM | Y |   |   |   |     |

|            |      |                                                                                                                               |    |   |   |   |   |   |
|------------|------|-------------------------------------------------------------------------------------------------------------------------------|----|---|---|---|---|---|
|            |      | In: Nah FFH, Tan CH, eds. Hci in Business, Government, and Organizations: Ecommerce and Innovation, Pt I. Vol 97512016:61-71. | EM | Y |   |   |   |   |
| Li         | 2016 |                                                                                                                               | EM | Y |   |   |   |   |
| Liang      | 2015 | IEEE International Conference on Smart City/SocialCom/SustainCom                                                              | EM |   |   |   |   | Y |
| Liao       | 2011 | Decision Support Systems                                                                                                      | EM |   | Y |   | Y |   |
| Lindner    | 2015 | PLOS One                                                                                                                      | EM | Y | Y |   |   |   |
| Lindner    | 2016 | American Journal of Evaluation                                                                                                | EM | Y |   |   |   |   |
| Lippi      | 2009 | Clinical Chemistry and Laboratory Medicine                                                                                    | ED |   |   | Y | Y |   |
| Lippi      | 2013 | Clinica Chimica Acta                                                                                                          | EM |   |   | Y | Y |   |
| Lippi      | 2017 | Annals of Translational Medicine                                                                                              | EM |   |   | Y | Y | Y |
| Lissoni    | 2011 | Industrial and Corporate Change                                                                                               | EM |   |   |   | Y |   |
| Littman    | 2017 | Medical Education Online                                                                                                      | EM |   | Y | Y | Y |   |
| Liu        | 2011 | Management Information Systems                                                                                                | EM |   | Y |   | Y | Y |
| Lopez      | 2015 | Journal of Surgical Education                                                                                                 | EM | Y |   | Y |   |   |
| Lopez      | 2015 | Journal of Hand Surgery America                                                                                               | EM |   | Y | Y |   |   |
| Lortie     | 2013 | Scientometrics                                                                                                                | EM |   | Y |   | Y |   |
| Lovegrove  | 2008 | BioScience                                                                                                                    | EM | Y |   | Y |   | Y |
| Lozano     | 2017 | Current Science                                                                                                               | ED |   | Y | Y |   | Y |
| MacMasters | 2017 | Academic Psychiatry                                                                                                           | EM |   | Y | Y |   |   |
| Maggio     | 2017 | Academic Medicine                                                                                                             | EM |   |   | Y |   | Y |
| Mali       | 2017 | Science & Public Policy                                                                                                       | EM |   |   |   |   |   |
| Markel     | 2017 | Journal of Pediatric Surgery                                                                                                  | EM |   | Y | Y |   | Y |

|             |      |                                                                        |    |   |   |   |   |   |   |
|-------------|------|------------------------------------------------------------------------|----|---|---|---|---|---|---|
| Markpin     | 2008 | Scientometrics                                                         | EM |   |   |   | Y |   | Y |
| Marsh       | 2008 | American Psychologist                                                  | EM | Y |   |   |   |   |   |
| Marshall    | 2017 | Otolaryngology—Head and Neck Surgery                                   | EM |   |   |   | Y |   |   |
| Marzolla    | 2016 | Journal of Informetrics                                                | EM | Y |   | Y |   | Y |   |
| Mas-Bleider | 2013 | Scientometrics                                                         | EM |   | Y |   |   | Y |   |
| Matsas      | 2012 | Brazilian Journal of Physics                                           | EM |   |   |   |   |   | Y |
| Maunder     | 2007 | La Revue Canadienne de Psychiatrie                                     | EM |   |   |   | Y | Y | Y |
| Maximin     | 2014 | RadioGraphics                                                          | ED | Y | Y |   | Y |   | Y |
| Mazlounian  | 2011 | PLOS One                                                               | EM |   |   |   |   |   | Y |
| Mazmanian   | 2014 | Evaluation & the Health Professions                                    | RE |   |   |   |   | Y |   |
| McAlister   | 2011 | American Heart Association Journals                                    | ED |   | Y |   | Y |   |   |
| McGovern    | 2013 | Academic Medicine                                                      | EM | Y | Y |   |   | Y |   |
| Medo        | 2016 | Physical Review                                                        | EM |   |   | Y |   | Y |   |
| Meho        | 2008 | Journal of the American Society for Information Science and Technology | EM |   | Y | Y |   |   |   |
| Mester      | 2016 | Interdisciplinary Description of Complex Systems                       | ED |   | Y | Y | Y |   |   |
| Metcalf     | 2010 | Radiologic Technology                                                  | EM |   |   |   |   |   |   |
| Milone      | 2016 | American Journal of Orthopedics                                        | EM | Y |   | Y |   |   | Y |
| Minasny     | 2013 | PeerJ                                                                  | EM |   | Y | Y |   |   |   |
| Mingers     | 2015 | European Journal of Operational Research                               | ED |   | Y | Y |   | Y |   |
| Mingers     | 2009 | Journal of the Operational Research Society                            | EM |   | Y | Y |   |   |   |
| Mingers     | 2017 | Scientometrics                                                         | EM |   | Y |   |   |   |   |

|                         |      |                                                                        |    |   |   |   |   |   |   |
|-------------------------|------|------------------------------------------------------------------------|----|---|---|---|---|---|---|
| Mirnezami               | 2016 | Science and Public Policy                                              | EM |   | Y |   |   | Y |   |
| Misteli                 | 2013 | The Journal of Cell Biology                                            | ED |   |   |   | Y |   |   |
| Moed                    | 2015 | Journal of the Association for Information Science and Technology      | RE |   |   |   |   |   | Y |
| Moed                    | 2009 | Archivum Immunologiae et Therapia Experimentalis                       | ED |   |   | Y | Y | Y |   |
| Mooij                   | 2014 | Scientometrics                                                         | EM |   |   |   |   | Y | Y |
| Moppett                 | 2011 | British Journal of Anaesthesia                                         | EM | Y | Y | Y |   | Y | Y |
| Moreira                 | 2015 | PLOS One                                                               | EM |   |   | Y | Y |   | Y |
| Morel                   | 2009 | PLOS Neglected Tropic Diseases                                         | EM |   |   | Y |   |   | Y |
| Moustafa                | 2016 | Accountability in Research-Policies and Quality Assurance              | ED |   | Y |   |   |   |   |
| Murphy                  | 2011 | Irish Journal of Medical Science                                       | EM |   | Y |   | Y |   |   |
| Murphy                  | 2017 | Nature                                                                 | ED |   |   |   |   | Y |   |
| Mutz                    | 2015 | Journal of the Association for Information Science and Technology      | EM | Y |   |   |   |   |   |
| Mutz                    | 2012 | Zeitschrift fur Psychologie                                            | EM | Y |   |   |   |   |   |
| Nah                     | 2009 | Journal of The American Society for Information Science and Technology | EM |   |   |   | Y | Y |   |
| Napolitano              | 2016 | Critical Care Medicine                                                 | ED |   | Y |   |   | Y |   |
| Nature Editorial Office | 2013 | Nature Letters                                                         | ED |   | Y |   | Y |   |   |
| Nature Editorial Office | 2017 | Nature                                                                 | ED |   |   |   | Y |   |   |
| Neufeld                 | 2011 | Research Evaluation                                                    | EM | Y |   | Y |   |   |   |
| Neylon                  | 2009 | PLOS Biology                                                           | ED |   | Y |   | Y |   |   |

|                    |      |                                                         |    |   |   |   |   |   |     |
|--------------------|------|---------------------------------------------------------|----|---|---|---|---|---|-----|
| Nicol              | 2007 | Medical Journal of Australia                            | EM | Y | Y |   | Y |   |     |
| Nicolini           | 2008 | Scientometrics                                          | EM |   |   |   | Y | Y |     |
| Niederkrotenthaler | 2011 | BMC Public Health                                       | EM |   |   |   |   |   | Y   |
| Nielsen            | 2017 | Studies in Higher Education                             | EM |   |   |   | Y | Y |     |
| Nigam              | 2012 | Indian Journal of Dermatology, Venerology and Leprology | ED |   |   |   | Y |   |     |
| Nightingale        | 2013 | Nurse Education in Practice                             | EM |   | Y | Y | Y |   | Y   |
| Nosek              | 2010 | Personality and Social Psychology Bulletin              | EM |   |   |   | Y |   | Y   |
| Nykl               | 2015 | Journal of Informetrics                                 | EM | Y |   |   | Y | Y |     |
| O'Brien            | 2012 | Oikos                                                   | ED |   |   |   |   |   |     |
| O'Connor           | 2010 | European Journal of Cancer Care                         | ED |   |   |   | Y | Y |     |
| Okhovati           | 2016 | Global Journal of Health Science                        | EM | Y | Y | Y | Y | Y |     |
| Oliveira           | 2013 | Revista Paulista de Pediatria                           | EM |   | Y | Y | Y | Y |     |
| Oliveira           | 2011 | Arquivos Brasileiros de Cardiologia                     | EM |   | Y | Y | Y |   |     |
| Oliveira           | 2013 | Scientometrics                                          | EM |   | Y | Y | Y | Y |     |
| Ophhof             | 2009 | Netherlands Heart Journal                               | EM |   |   |   | Y | Y |     |
| Orduna-Malea       | 2015 | El Profesional de la Información                        | ED | Y | Y | Y | Y |   | Y Y |
| Osterloh           | 2015 | Evaluation Review                                       | EM | Y | Y |   | Y |   |     |
| Quimet             | 2011 | Scientometrics                                          | EM |   |   |   | Y |   | Y   |
| Pagani             | 2015 | Scientometrics                                          | RE |   | Y |   | Y |   | Y   |
| Pagel              | 2011 | British Journal of Anaesthesia                          | EM |   |   |   | Y |   |     |
| Pagel              | 2011 | Anaesthesia                                             | EM |   |   |   | Y |   | Y   |
| Pagel              | 2015 | Original Investigations in Education                    | EM |   | Y | Y |   | Y |     |

|               |      |                                                      |    |   |   |   |   |   |   |
|---------------|------|------------------------------------------------------|----|---|---|---|---|---|---|
| Paik          | 2014 | Surgical Education                                   | EM |   |   | Y |   |   |   |
| Pan           | 2014 | Science Reports                                      | EM |   |   | Y | Y |   | Y |
| Pandit        | 2011 | Anaesthesia                                          | ED |   | Y | Y |   | Y |   |
| Patel         | 2013 | Journal of the Royal Society of Medicine             | EM | Y | Y | Y | Y | Y | Y |
| Patel         | 2011 | Journal of the Royal Society of Medicine             | RE |   | Y | Y | Y | Y |   |
| Patrow        | 2011 | Journal of Postgraduate Medicine                     | ED |   |   | Y |   |   |   |
| Pepe          | 2012 | PLOS One                                             | EM |   |   | Y |   |   | Y |
| Pereyra-Rojas | 2017 | Frontiers in Psychology                              | EM | Y |   | Y |   | Y |   |
| Perlin        | 2017 | Journal of Informetrics                              | EM |   | Y |   | Y |   |   |
| Persson       | 2014 | Acta Physiologica                                    | ED |   |   |   |   |   | Y |
| Peters        | 2017 | Journal of Infometrics                               | ED |   |   |   | Y |   |   |
| Petersen      | 2013 | Journal of Informetrics                              | EM |   |   |   |   |   | Y |
| Petersen      | 2010 | Physical Review                                      | EM |   |   |   |   |   |   |
| Pinnock       | 2012 | Nurse Education Today                                | ED |   | Y |   | Y |   |   |
| Pöder         | 2017 | Trames-Journal of the Humanities and Social Sciences | EM |   |   | Y |   |   | Y |
| Prabhu        | 2017 | World Neurosurgery                                   | ED |   |   | Y | Y | Y | Y |
| Prathap       | 2016 | Scientometrics                                       | EM |   | Y |   | Y |   |   |
| Prathap       | 2012 | Scientometrics                                       | EM |   |   | Y | Y | Y |   |
| Prathap       | 2014 | Scientometrics                                       | EM |   |   | Y |   |   | Y |
| Prathap       | 2017 | Current Science                                      | ED |   | Y | Y | Y |   | Y |
| Pringle       | 2008 | Learned Publishing                                   | ED |   | Y | Y | Y | Y |   |
| Pshetizky     | 2009 | Journal of the American Board of Family Medicine     | EM |   | Y |   | Y |   |   |



|                   |      |                                                                                 |    |   |   |   |   |   |   |
|-------------------|------|---------------------------------------------------------------------------------|----|---|---|---|---|---|---|
| Pugh Jr           | 2013 | Journal of General Physiology                                                   | ED |   |   |   |   | Y |   |
| Pulina            | 2007 | Italian Journal of Animal Science                                               | EM |   | Y | Y | Y | Y |   |
| Pyke              | 2015 | BioScience                                                                      | ED |   |   |   |   |   | Y |
| Qi                | 2016 | Scientometrics                                                                  | EM |   | Y |   |   |   |   |
| Quigley           | 2012 | Journal of Cancer Education                                                     | EM |   |   | Y |   |   |   |
| Rad               | 2012 | Academic Radiology                                                              | EM |   |   | Y |   |   |   |
| Radicchi          | 2008 | Proceedings of the National Academy of Sciences of the United States of America | EM |   | Y | Y |   | Y | Y |
| Radicchi          | 2012 | Journal of Informetrics                                                         | EM |   | Y |   |   | Y |   |
| Raj               | 2016 | Academic Medicine                                                               | EM |   | Y | Y |   | Y |   |
| Ramasesha         | 2011 | Current Science                                                                 | ED |   | Y | Y | Y | Y |   |
| Rana              | 2013 | Journal of Cancer Education                                                     | EM |   | Y | Y |   |   |   |
| Ravenscroft       | 2017 | PLOS One                                                                        | EM |   |   |   | Y | Y | Y |
| Rey-Rocha         | 2015 | Scientometrics                                                                  | EM |   | Y |   |   |   |   |
| Rezek             | 2011 | Academic Radiology                                                              | EM |   |   |   |   |   |   |
| Ribas             | 2015 | Proceedings of the 24th International Conference on World Wide Web              | O  | Y | Y | Y |   |   | Y |
| Ribas             | 2015 | arXiv                                                                           | ED |   |   |   |   |   | Y |
| Ricker            | 2009 | Interciencia                                                                    | ED | Y |   |   |   | Y | Y |
| Rieder            | 2010 | Langenbeck's Archives of Surgery                                                | ED |   |   | Y |   | Y |   |
| Robinson          | 2011 | Journal of School Psychology                                                    | ED |   |   |   |   | Y |   |
| Rodriguez-Navarro | 2011 | PLOS One                                                                        | EM |   |   |   |   |   | Y |
| Ronai             | 2012 | Pigment Cell and Melanoma research                                              | ED | Y | Y |   |   |   |   |

|               |      |                                                |    |   |   |   |   |   |
|---------------|------|------------------------------------------------|----|---|---|---|---|---|
| Rons          | 2009 | Research Evaluation                            | EM |   |   |   |   |   |
| Rosati        | 2016 | Journal of Cardiac Surgery                     | EM |   |   | Y |   |   |
| Ruane         | 2009 | Scientometrics                                 | EM |   | Y | Y |   | Y |
| Saad          | 2010 | Scientometrics                                 | EM |   |   | Y |   |   |
| Safdar        | 2015 | Society for Academic Emergency Medicine (SAEM) | EM | Y |   |   |   |   |
| Sahel         | 2011 | Science Translational Medicine                 | ED |   | Y | Y | Y |   |
| Sahoo         | 2017 | Omega                                          | EM |   | Y | Y | Y | Y |
| Saleem        | 2011 | Internal Archives of Medicine                  | ED |   |   | Y | Y |   |
| Sangam        | 2008 | Current Science                                | ED |   |   | Y | Y |   |
| Santangelo    | 2017 | Molecular Biology of the Cell                  | ED |   |   |   | Y | Y |
| Saraykar      | 2017 | Academic Psychiatry                            | EM |   |   | Y |   |   |
| Sarli         | 2016 | Missouri Medicine                              | ED |   |   |   | Y | Y |
| Satyanarayana | 2008 | Indian Journal of Medical Research             | ED |   |   | Y | Y |   |
| Saxena        | 2013 | Journal of Pharmacology Pharmacotherapeutics   | EM |   |   | Y | Y | Y |
| Sebire        | 2008 | Ultrasound in Obstetrics and Gynaecology       | ED |   |   | Y |   | Y |
| Selek         | 2014 | Scientometrics                                 | EM |   | Y | Y |   | Y |
| Seo           | 2017 | Management Decision                            | EM |   |   |   | Y |   |
| Shanta        | 2013 | Journal of Medical Physics                     | ED |   | Y | Y | Y |   |
| Shibayama     | 2015 | Research Policy                                | EM |   | Y |   | Y |   |
| Sibbald       | 2015 | Journal of the Medical Library Association     | ED |   |   |   |   | Y |
| Simons        | 2008 | Science                                        | ED |   |   |   | Y |   |
| Sittig        | 2015 | MEDINFO 2015: eHealth-enabled Health           | EM |   | Y | Y |   | Y |

|                  |      |                                                                                 |    |   |   |   |   |   |
|------------------|------|---------------------------------------------------------------------------------|----|---|---|---|---|---|
| Slim             | 2017 | Anaesthesia, Critical Care & Pain Medicine                                      | ED |   | Y | Y |   | Y |
| Slyder           | 2011 | Scientometrics                                                                  | EM |   | Y |   |   |   |
| Smeyers          | 2011 | Journal of Philosophy of Education                                              | ED |   | Y |   | Y |   |
| Smith            | 2008 | Bone & Joint Journal                                                            | ED |   |   |   | Y |   |
| Soares de Araujo | 2011 | Revista Brasileira de Medicina do Esporte                                       | EM |   |   | Y | Y | Y |
| Sobhy            | 2016 | Embo Reports                                                                    | ED |   |   |   | Y |   |
| Sobkowicz        | 2015 | Journal of Artificial Societies and Social Simulation                           | EM | Y |   |   |   |   |
| Solarino         | 2012 | Annals of Geophysics                                                            | RE |   | Y | Y | Y | Y |
| Sood             | 2015 | Eplasty                                                                         | EM |   |   | Y |   |   |
| Sorenson         | 2011 | Journal of Parkinson's Disease                                                  | EM |   | Y | Y |   | Y |
| Spaan            | 2009 | Medical & Biological Engineering & Computing                                    | ED |   |   | Y | Y |   |
| Spearman         | 2010 | Journal of Neurosurgery                                                         | EM |   |   | Y |   |   |
| Spreckelsen      | 2011 | BMC Medical Informatics and Decision Making                                     | EM |   |   | Y | Y | Y |
| Staller          | 2017 | Qualitative Social Work                                                         | ED |   | Y | Y |   | Y |
| Stallings        | 2013 | Proceedings of the National Academy of Sciences of the United States of America | EM |   | Y | Y |   | Y |
| Street           | 2009 | Health Research Policy and System                                               | EM | Y |   |   |   |   |
| Stroebe          | 2010 | American Psychologist                                                           | ED |   | Y |   |   | Y |
| Stroobants       | 2013 | Nature                                                                          | ED |   |   |   |   |   |
| Sturmer          | 2013 | Revista Brasileira De Fisioterapia                                              | EM |   | Y | Y |   |   |
| Suiter           | 2015 | The Journal of Academic Librarianship                                           | EM |   |   | Y | Y | Y |
| Suminski         | 2012 | The Journal of the American Osteopathic Association                             | EM |   | Y |   | Y | Y |

|                  |      |                                              |    |   |   |   |   |   |   |
|------------------|------|----------------------------------------------|----|---|---|---|---|---|---|
| Surla            | 2017 | The Electronic Library                       | ED |   | Y |   | Y |   | Y |
| Susarla          | 2015 | Plastic and Reconstructive surgery           | EM |   | Y | Y |   |   |   |
| Susarla          | 2015 | Journal of Dental Education                  | EM | Y |   | Y |   |   |   |
| Sutherland       | 2011 | PLOS One                                     | EM | Y |   |   | Y |   |   |
| Svider           | 2013 | Laryngoscope                                 | EM |   |   | Y |   |   |   |
| Svider           | 2014 | Ophthalmology                                | EM | Y |   | Y |   |   |   |
| Svider           | 2013 | Laryngoscope                                 | EM | Y |   | Y |   |   |   |
| Svider           | 2013 | Laryngoscope                                 | EM |   |   | Y |   | Y |   |
| Swanson          | 2016 | Annals of Plastic Surgery                    | EM |   |   | Y |   |   |   |
| Szklo            | 2008 | Epidemiology                                 | ED |   |   |   | Y |   |   |
| Szymanski        | 2012 | Information Sciences                         | EM |   |   | Y | Y | Y | Y |
| Taborsky         | 2007 | International Journal of Behavioural Biology | ED | Y |   |   |   |   |   |
| Tan              | 2016 | The Annals of Applied Statistics             | EM |   | Y | Y | Y |   | Y |
| Tandon           | 2015 | National Academy Science Letters-India       | ED |   |   |   | Y |   |   |
| Taylor           | 2015 | Poultry Science                              | ED |   |   | Y | Y |   | Y |
| Teixeira         | 2013 | PLOS One                                     | EM |   |   | Y |   |   |   |
| Tenreiro Machado | 2017 | Entropy                                      | EM | Y |   |   |   | Y |   |
| Thelwall         | 2017 | Aslib Journal of Information Management      | EM |   |   |   |   |   | Y |
| Therattil        | 2016 | Annals of Plastic Surgery                    | EM |   |   | Y |   |   |   |
| Thomaz           | 2011 | Arquivos Brasileiros De Cardiologia          | ED |   |   | Y | Y | Y |   |
| Thorngate        | 2014 | Advances in Social Simulation                | EM | Y |   |   |   |   |   |
| Tijdink          | 2016 | BMJ Open                                     | EM |   |   |   |   |   |   |

|                   |      |                                                                                 |    |   |   |   |   |   |
|-------------------|------|---------------------------------------------------------------------------------|----|---|---|---|---|---|
| Timothy           | 2015 | Tourism Management                                                              | ED |   |   |   | Y |   |
| Torrizi           | 2014 | Scientometrics                                                                  | EM | Y |   | Y | Y | Y |
| Tricco            | 2017 | PLOS One                                                                        | RE | Y |   |   |   |   |
| Trueger           | 2015 | Annals of Emergency Medicine                                                    | ED |   |   | Y | Y | Y |
| Tschudy           | 2016 | Journal of Pediatrics                                                           | EM |   |   | Y |   | Y |
| Tse               | 2008 | Nature                                                                          | ED |   |   | Y | Y | Y |
| Tuitt             | 2011 | Canadian Journal of Gastroenterology                                            | EM |   |   | Y | Y | Y |
| Usmani            | 2011 | Sudanese Journal of Paediatrics                                                 | ED |   |   | Y | Y |   |
| Valsangkar        | 2016 | Surgery                                                                         | EM |   | Y | Y |   | Y |
| van Arensbergen   | 2012 | Higher Education Policy                                                         | EM | Y |   |   |   |   |
| van den Besselaar | 2009 | Research Evaluation                                                             | EM | Y | Y |   |   |   |
| van Eck           | 2013 | PLOS One                                                                        | EM |   | Y |   |   |   |
| van Leeuwen       | 2008 | Research Evaluation                                                             | EM |   |   | Y |   |   |
| van Leeuwen       | 2012 | Research Evaluation                                                             | EM | Y |   |   |   |   |
| van Noorden       | 2010 | Nature                                                                          | ED |   |   | Y | Y | Y |
| van Wesel         | 2016 | Science and Engineering Ethics                                                  | EM |   |   |   |   |   |
| Vaughan           | 2017 | Scientometrics                                                                  | EM |   |   |   |   | Y |
| Verma             | 2015 | Proceedings of the National Academy of Sciences of the United States of America | ED | Y |   |   | Y |   |
| Vico              | 2015 | Prometheus                                                                      | EM | Y |   |   |   |   |
| Vieira            | 2011 | Scientometrics                                                                  | EM |   |   |   |   | Y |
| Vinkler           | 2012 | Journal of Informetrics                                                         | ED |   |   |   | Y |   |

|              |      |                                                                                                                                                  |    |   |   |   |   |   |   |
|--------------|------|--------------------------------------------------------------------------------------------------------------------------------------------------|----|---|---|---|---|---|---|
| Vinyard      | 2016 | Computers in libraries                                                                                                                           | ED |   |   | Y | Y |   | Y |
| von Bartheld | 2015 | PeerJ                                                                                                                                            | EM |   |   | Y | Y | Y |   |
| Wacogne      | 2016 | Archives of Disease in Childhood-Education and Practice Edition                                                                                  | ED |   |   | Y | Y | Y | Y |
| Wagner       | 2012 | Research Evaluation                                                                                                                              | ED |   | Y |   |   |   | Y |
| Waisbren     | 2008 | Journal of Women's Health                                                                                                                        | EM |   |   |   |   |   |   |
| Walijee      | 2015 | Plastic and Reconstructive Surgery                                                                                                               | ED |   |   |   |   |   | Y |
| Walker       | 2010 | BMC Medical Education                                                                                                                            | EM |   | Y |   | Y | Y |   |
| Wallace      | 2012 | PLOS One                                                                                                                                         | EM | Y | Y |   |   |   |   |
| Walters      | 2011 | Journal of the American Society for Information Science and Technology                                                                           | EM | Y | Y |   | Y |   |   |
| Waltman      | 2013 | In: Gorraiz J, Schiebel E, Gumpenberger C, Horlesberger M, Moed H, eds. 14th International Society of Scientometrics and Informetrics Conference | EM |   | Y | Y |   |   | Y |
| Waltman      | 2013 | Journal of Informetrics                                                                                                                          | EM |   | Y |   |   |   |   |
| Wang         | 2013 | Science                                                                                                                                          | EM |   |   | Y | Y | Y | Y |
| Ward         | 2012 | Anaesthesia                                                                                                                                      | ED |   |   |   |   |   |   |
| Watson       | 2015 | Journal of Pediatric Surgery                                                                                                                     | EM |   | Y | Y |   |   |   |
| Welk         | 2014 | Research Quarterly for Exercise and Sport                                                                                                        | ED |   |   |   | Y |   |   |
| Wieczorek    | 2016 | Financial Environment and Business Development                                                                                                   | ED |   | Y | Y | Y |   |   |
| Wildgaard    | 2014 | Scientometrics                                                                                                                                   | RE |   | Y | Y | Y | Y |   |
| Williamson   | 2008 | Family Medicine                                                                                                                                  | EM |   |   |   |   |   | Y |
| Wootton      | 2013 | Health Research Policy and Systems                                                                                                               | EM | Y |   |   | Y |   | Y |
| Würtz        | 2016 | Annals of Epidemiology                                                                                                                           | RE |   |   | Y |   |   |   |

|             |      |                                                   |    |   |   |   |   |   |
|-------------|------|---------------------------------------------------|----|---|---|---|---|---|
| Wykes       | 2013 | Journal of Mental Health                          | ED |   | Y | Y |   |   |
| Yaminfirooz | 2015 | The Electronic Library                            | EM |   | Y |   |   | Y |
| Yang        | 2013 | Journal of Informetrics                           | EM | Y | Y |   |   | Y |
| Yates       | 2015 | Source Code for Biology and Medicine              | EM | Y |   |   |   |   |
| Yu          | 2016 | Computers in Human Behaviour                      | EM |   |   |   |   | Y |
| Ze          | 2012 | International Conference on Intelligent Computing | EM |   | Y | Y |   |   |
| Zhang       | 2012 | Scientometrics                                    | EM |   |   |   |   | Y |
| Zhang       | 2017 | PLOS One                                          | EM |   | Y |   | Y |   |
| Zhang       | 2012 | Scientometrics                                    | EM |   | Y | Y |   | Y |
| Zhao        | 2014 | Scientometrics                                    | EM | Y |   |   | Y | Y |
| Zhou        | 2012 | New Journal of Physics                            | EM |   |   | Y |   | Y |
| Zhu         | 2015 | arXiv                                             | EM |   |   |   |   | Y |
| Zhuo        | 2008 | Molecular Pain                                    | EM | Y |   | Y |   | Y |
| Zima        | 2008 | Biochemia Medica                                  | ED |   |   | Y | Y |   |
| Zou         | 2016 | Scientometrics                                    | EM |   | Y | Y |   | Y |
| Zupetic     | 2017 | Academic Radiology                                | EM |   | Y |   |   |   |
| Zyczkowski  | 2010 | Scientometrics                                    | ED |   |   |   |   | Y |

<sup>^</sup>Empirical (EM); Editorial/Opinion (ED); Review (RE); Other (O).
